# Supplementary material for: Transcriptomic Profiling Reveals Predictive Markers of Response to Concurrent Chemoradiotherapy plus Immune Checkpoint Inhibition in Cervical Cancer
Source: Research Square preprint supplement (doi:10.21203/rs.3.rs-7266839/v1), 2025-08-13
Supplement: Supplementary file 1 [file 03f32fc062b0ff51441fdbe6.docx]

**Supplementary Materials**

**Supplementary Methods**

**Public data acquirement**

RNA-seq expression profiles and the relevant clinical data of TCGA-CESC and CGCI-HTMCP-CC cohorts were obtained from GDC database (https://portal.gdc.cancer.gov/). Furthermore, we extracted clinical information, which encompassed age, FIGO stage, TNM stage, histological type, vital status, days until death, and days until the last follow-up. In the initial stages, we excluded samples that had been diagnosed as endometrioid adenocarcinoma. Additionally, we excluded samples without available survival data or with follow-up period shorter than 30 days. We also removed duplicate samples and normal adjacent samples. Consequently, 268 samples from TCGA-CESC and 109 sample from CGCI-HTMCP-CC were retained for further analysis.

**Single cell RNA sequencing analysis**

The data used in this study consists of six single cell sequencing samples from tumor tissues of LACC. DoubletFinder v2.0 was used to estimate cell doublet distribution (1). Subsequent analyses were conducted using Seurat (version 4.4.0) (2). The single-cell gene expression data from all samples were integrated, and transcriptomes were filtered to include cells with 200-5,000 detected genes, 200-25,000 counted UMIs, a fraction of mitochondrial reads less than 5%, and a fraction of hemoglobin reads less than 5%. Following the filtration process, UMI counts were variance-stabilized using SCTransform with 3000 variable features, while adjusting for the number of UMIs. The RunPCA and RunUMAP functions were used for dimensionality reduction clustering. The number of principal components (PCs) is 30, which is determined by the inflection point of the ElbowPlot function. Based on the clustering results, cell types were annotated using previously reported gene markers. We used the FindAllMarkers function to analyze the key genes of each cell subpopulation (min. pct = 0.25, logfc. threshold = 0.25).

**Statistical analysis**

Data analysis and processing were conducted using R software (v.4.1.3) and its associated package. For continuous data, statistical significance was interrogated using Wilcoxon's test, which were two-tailed. Significance threshold of p-value was set as 0.05. All derivative figures were generated using the R package ‘ggplot2’. Survival analysis was conducted using the log-rank test (built into ‘ggsurvplot’ in the package ‘survminer’, which was also used to plot survival curves), with Kaplan-Meier curves created using ‘survfit’ from the package ‘survival’.

**Supplementary Figure**


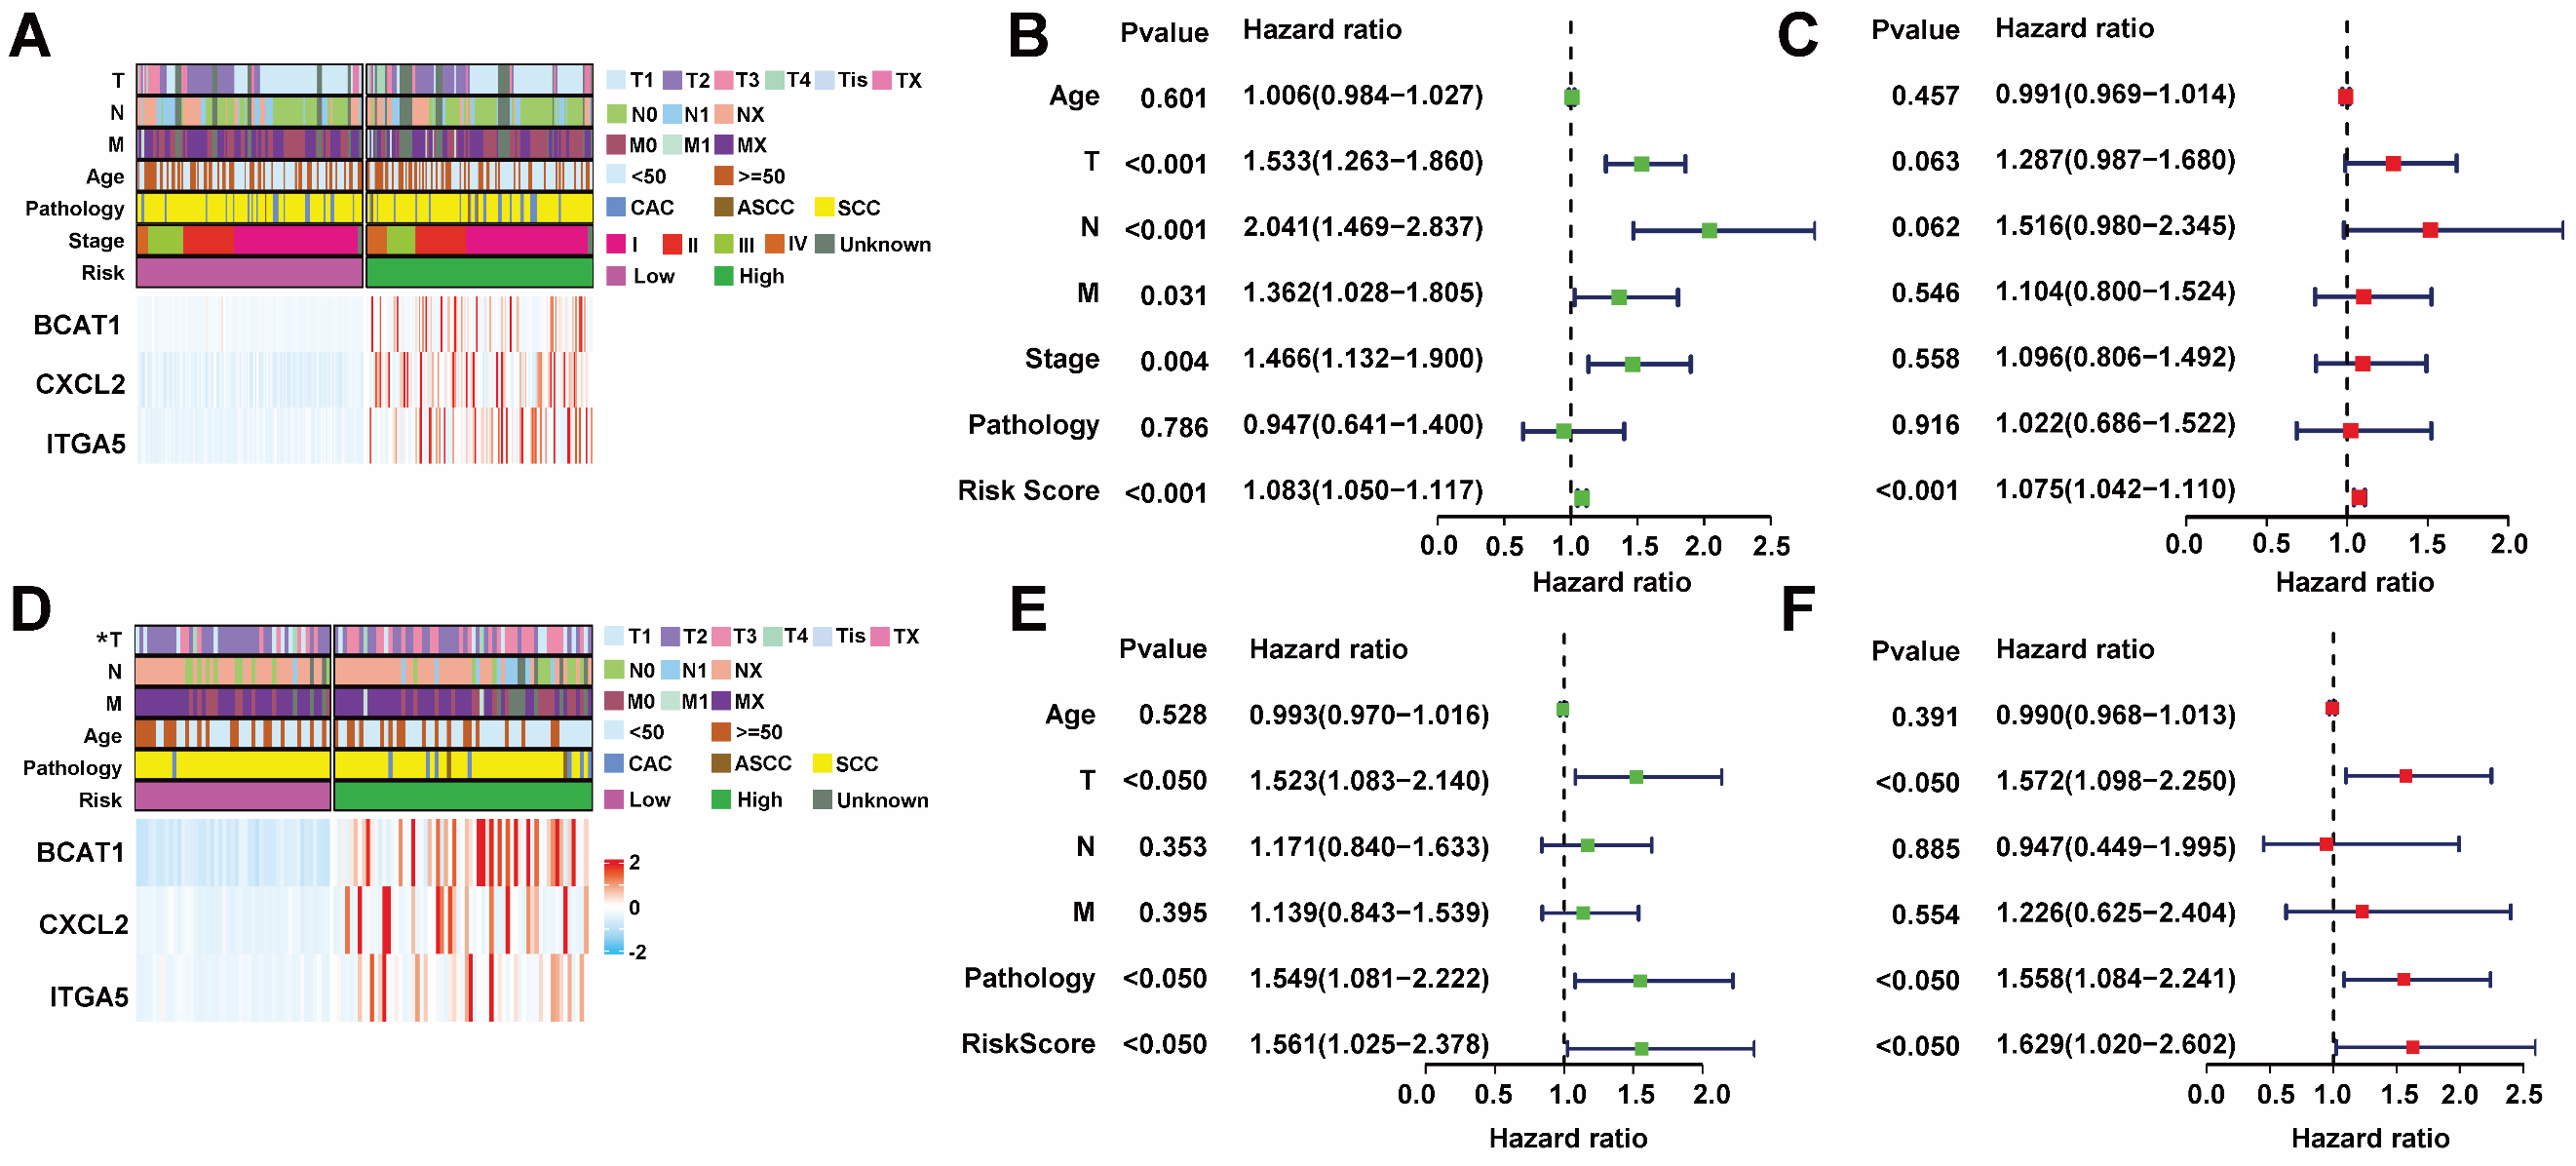


**Supplementary Figure. The characteristics of the prognostic risk model.**

**(A)** Heatmap displaying clinical features and expression of BCAT1, CXCL2 and ITGA5 corresponding to patients from TCGA-CESC grouped by risk group.

**(B)** Univariate Cox regression analyses of clinicopathological parameters using the TCGA-CESC dataset.

**(C)** Multivariate Cox regression analyses of clinicopathological parameters using the TCGA-CESC dataset.

**(D)** Heatmap displaying clinical features and expression of BCAT1, CXCL2 and ITGA5 corresponding to patients from CGCI-HTMCP-CC grouped by risk group.

**(E)** Univariate Cox regression analyses of clinicopathological parameters using the CGCI-HTMCP-CC dataset.

**(F)** Multivariate Cox regression analyses of clinicopathological parameters using the CGCI-HTMCP-CC dataset.

**Supplementary Tables**

**Supplementary Table 1.** Clinical demographic data and treatment response of the patients with cervical cancer included in this study.

**Supplementary Table 2.** Differentially expressed genes of tumor tissues from CR patients versus non-CR patients.

**Supplementary Table 3-4**. Genes sets of biological process (BP) pathways in the Gene Ontology (GO) database enriched for highly expressed genes in tumor tissues of CR (Supplementary Table 3) or non-CR patients (Supplementary Table 4).

**Supplementary Table 5-6.** Genes sets of cellular component (CC) pathways in the GO database enriched for highly expressed genes in tumor tissues of CR (Supplementary Table 5) or non-CR patients (Supplementary Table 6).

**Supplementary Table 7-8.** Genes sets of molecular function (MF) pathways in the GO database enriched for highly expressed genes in tumor tissues of CR (Supplementary Table 7) or non-CR patients (Supplementary Table 8).

**Supplementary Table 9-10.** Genes sets of Kyoto Encyclopedia of Genes and Genomes (KEGG) pathways enriched for highly expressed genes in tumor tissues of CR (Supplementary Table 9) or non-CR patients (Supplementary Table 10).

**Supplementary references**

1. McGinnis CS, Murrow LM, Gartner ZJ. DoubletFinder: Doublet Detection in Single-Cell RNA Sequencing Data Using Artificial Nearest Neighbors. Cell Systems. 2019;8(4):329-37.e4.

2. Lee MYY, Kaestner KH, Li M. Benchmarking algorithms for joint integration of unpaired and paired single-cell RNA-seq and ATAC-seq data. Genome Biology. 2023;24(1).
