# Supplementary material for: Transcriptomic Profiling Reveals Predictive Markers of Response to Concurrent Chemoradiotherapy plus Immune Checkpoint Inhibition in Cervical Cancer
Source: Research Square preprint supplement (doi:10.21203/rs.3.rs-7266839/v1), 2025-08-13
Supplement: Supplementary file 2 [file c911dad1c23e142fed27e50d.xlsx]

## Sheet: TableS1
Sample_id	Age	FIGO_Stage	HPV	Tumor_Size (cm)	Tumor_Volume (cm3)	preSCC(μg/L)	Lymph node metastasis	Immunotherapy	Duration(weeks)	Treatment Response Assessment
CC1	58.1	III	Other	7.5	139.4	>7.5	yes	yes	<=8	Complete_response
CC2	62.4	II	HPV16	5.6	77.2	>7.5	no	yes	>8	Non_complete_response
CC3	58	I	Other	6.3	38.3	<=1.5	no	yes	<=8	Non_complete_response
CC4	37.3	II	HPV16	3.1	9.2	<=7.5	no	yes	<=8	Complete_response
CC5	59.8	III	HPV16	3.3	9.6	<=7.5	no	yes	>8	Complete_response
CC6	68	II	HPV16	3.8	16	<=7.5	no	yes	<=8	Complete_response
CC7	58.4	II	HPV16	4.6	15.5	<=7.5	no	yes	>8	Complete_response
CC8	55	III	HPV16	3.8	18	<=7.5	yes	yes	>8	Non_complete_response
CC9	42.2	III	HPV16	5.4	61	>7.5	yes	yes	>8	Complete_response
CC10	55.1	II	HPV18	3.4	14.3	>7.5	no	yes	>8	Non_complete_response
CC11	57.2	III	HPV18	4.5	25.7	>7.5	yes	yes	>8	Non_complete_response
CC12	44	III	HPV16	4.1	22.4	>7.5	yes	yes	>8	Complete_response
CC13	42.3	III	HPV16	5.3	50	<=1.5	yes	yes	<=8	Complete_response
CC14	46.9	III	HPV16	5	31.8	>7.5	yes	yes	>8	Complete_response
CC15	46.9	III	Other	5.4	48.4	<=7.5	yes	yes	>8	Non_complete_response
CC16	54.1	III	HPV16	5.7	71.4	>7.5	yes	yes	>8	Complete_response
CC17	52.3	III	HPV16	5.5	46.7	>7.5	yes	yes	>8	Complete_response
CC18	60.8	III	HPV16	6.3	72.7	>7.5	yes	yes	>8	Complete_response
CC19	68.4	III	HPV16	6.9	104.1	>7.5	yes	yes	>8	Complete_response
CC20	49	III	HPV16	5.3	46.1	>7.5	yes	yes	>8	Non_complete_response
CC21	49.1	III	HPV16	5.1	47.1	<=7.5	yes	yes	>8	Non_complete_response
CC22	41	III	Other	5.6	52.9	<=7.5	yes	yes	>8	Complete_response
CC23	36.4	III	HPV16	5	44.5	>7.5	yes	yes	<=8	Complete_response
CC24	57	III	Other	4.7	40	>7.5	yes	yes	>8	Non_complete_response
CC25	51	III	HPV16	2.7	7	<=1.5	yes	yes	>8	Non_complete_response
CC26	65.9	III	Other	5.6	52.2	>7.5	yes	yes	<=8	Complete_response
CC27	57	III	HPV16	5.3	52.4	<=7.5	yes	yes	>8	Complete_response
CC28	56	III	HPV16	4.5	34.4	<=7.5	yes	yes	>8	Non_complete_response
CC29	34	III	HPV16	4.4	20.5	<=7.5	yes	yes	>7	Non_complete_response
CC30	70.9	IV	HPV16	4.7	52.5	<=7.5	no	yes	>8	Non_complete_response
CC31	55.7	II	HPV16	5.5	50.5	<=7.5	no	yes	>8	Complete_response
CC32	58.9	II	HPV16	4.7	49.5	<=7.5	no	yes	<=8	Complete_response
CC33	56.1	II	HPV16	8.5	251.4	<=7.5	no	yes	>8	Non_complete_response
CC34	70.5	II	HPV16	4.2	29.9	>7.5	no	yes	<=8	Complete_response
CC35	55.5	II	Other	5.8	64.8	<=7.5	no	yes	>8	Complete_response
CC36	68.3	II	HPV16	5.8	40.7	>7.5	no	yes	<=8	Non_complete_response
CC37	43.7	III	HPV18	5.1	55.7	>7.5	yes	yes	>8	Complete_response
CC38	39.8	III	HPV16	7.4	140.5	<=7.5	yes	yes	>8	Complete_response
CC39	62	III	HPV16	7.4	109.1	>7.5	yes	yes	<=8	Complete_response
CC40	64	III	HPV16	5.3	49.6	>7.5	yes	yes	>8	Complete_response
CC41	37.5	III	HPV16	4.8	35	>7.5	yes	yes	<=8	Complete_response
CC42	57.7	III	HPV18	5.7	83	>7.5	yes	yes	<=8	Complete_response
CC43	51.1	III	HPV16	4.6	17.8	>7.5	yes	yes	<=8	Non_complete_response
CC44	69.6	II	HPV18	4.1	29.2	<=7.5	no	yes	<=8	Complete_response
CC45	58	III	HPV18	6.1	50.7	<=7.5	yes	yes	>8	Non_complete_response
CC46	58	IV	HPV16	4.7	35.7	<=7.5	yes	yes	<=8	Non_complete_response
CC47	51	I	HPV16	5.3	49.8	>7.5	no	yes	<=8	Complete_response
CC48	63	III	Other	4.5	36.5	>7.5	no	yes	>8	Complete_response
CC49	68	I	HPV16	4.4	30.5	>7.5	no	yes	<=8	Complete_response
CC50	56	III	Negative	5	43.7	>7.5	yes	yes	<=8	Complete_response
CC51	49	III	HPV16	6	76.5	>7.5	yes	yes	>8	Non_complete_response
CC52	56	III	Other	6.5	78.5	<=1.5	yes	yes	>8	Complete_response
CC53	69.8	III	HPV16	5.4	41.3	<=1.5	yes	yes	<=8	Non_complete_response
CC54	50	III	Other	7	141.5	>7.5	yes	yes	<=8	Complete_response
CC55	59.5	I	HPV18	4.8	24.9	<=1.5	no	yes	<=8	Complete_response
CC56	34.2	III	Negative	4.1	24.6	<=7.5	yes	yes	>8	Complete_response
CC57	46.1	III	Other	6	77.2	>7.5	yes	yes	<=8	Non_complete_response
CC58	71	III	HPV16	6	74.6	>7.5	yes	yes	>8	Complete_response
CC59	50	III	HPV16	5	40	>7.5	yes	yes	<=8	Complete_response
CC60	55	III	HPV18	4.6	24.5	>7.5	yes	yes	>8	Non_complete_response
CC61	53.1	II	Other	5.9	83.6	<=1.5	no	yes	<=8	Complete_response
CC62	41	III	HPV16	5.9	67.6	>7.5	yes	yes	<=8	Complete_response
CC63	53	I	HPV16	3.9	11.7	<=7.5	no	yes	>8	Non_complete_response
CC64	62	III	Other	3.1	9.4	>7.5	yes	yes	<=8	Non_complete_response
CC65	45	III	HPV16	4.8	40	>7.5	yes	yes	>8	Complete_response
CC66	39	III	HPV16	5	50.3	>7.5	yes	yes	>8	Complete_response
CC67	52	III	HPV16	5.4	54.1	<=7.5	yes	yes	<=8	Complete_response
CC68	49	I	HPV16	5.2	31.8	<=1.5	no	yes	>8	Complete_response
CC69	48	II	Negative	3.1	9.2	>7.5	no	yes	>8	Complete_response
CC70	60	III	Other	6	73.3	>7.5	yes	yes	>8	Complete_response
CC71	58	III	HPV16	7.7	82.8	>7.5	yes	yes	<=8	Complete_response

## Sheet: TableS2
	baseMean	log2FoldChange	lfcSE	stat	pvalue	padj
ADAMTS3	31.3059	1.35546	0.414393	-3.27094	0.0010719	0.0997515
ADAMTSL4	790.352	1.35353	0.406761	-3.32759	0.000876009	0.0922785
ADGRG3	125.894	1.65556	0.47819	-3.46214	0.000535892	0.0698908
ADM	3172.49	1.28958	0.348002	-3.70566	0.000210837	0.0446831
ADRA2B	22.6712	-1.50651	0.420704	3.58092	0.000342392	0.0570144
AMIGO2	379.945	1.31132	0.379893	-3.45182	0.00055681	0.0714245
ANPEP	817.621	1.1796	0.359683	-3.27955	0.00103972	0.0987248
APLN	276.789	1.88694	0.460672	-4.09607	4.2e-05	0.0231248
AQP9	503.4	2.21137	0.590569	-3.74447	0.000180772	0.0432229
AREG	244.928	1.53043	0.414416	-3.69299	0.000221637	0.0459281
BCAT1	740.484	1.51077	0.431047	-3.50488	0.000456813	0.0645421
BCL2A1	516.236	2.10779	0.511152	-4.1236	3.73e-05	0.0231248
BPIFA1	33.1424	5.17507	1.38075	-3.748	0.000178247	0.0432229
C4orf48	292.458	1.00951	0.297215	-3.39655	0.000682403	0.0790486
C8orf88	12.0775	1.44074	0.439212	-3.28028	0.00103704	0.0987248
CATSPER1	14.8574	1.42021	0.399864	-3.55174	0.000382688	0.0598341
CCDC71L	1103.02	1.07441	0.290655	-3.69651	0.000218585	0.0458046
CCL20	905.357	1.77067	0.537881	-3.29193	0.000995022	0.0971579
CCL3L1	41.1541	1.98866	0.581917	-3.41743	0.000632159	0.076169
CCN1	1461.8	1.46032	0.369392	-3.95331	7.71e-05	0.0296515
CD300E	167.123	1.87822	0.535081	-3.51015	0.000447848	0.0637586
CEBPB	7428.92	1.16845	0.265999	-4.39271	1.12e-05	0.0115991
CPA4	708.441	1.71739	0.449039	-3.82458	0.000130995	0.0372072
CSF2	31.6015	2.32424	0.668018	-3.4793	0.000502721	0.0677238
CTSE	37.8643	2.26341	0.651604	-3.47359	0.000513544	0.0684114
CXCL2	468.848	2.19085	0.52776	-4.15123	3.31e-05	0.0221449
CXCL3	544.717	2.81481	0.576286	-4.8844	1.04e-06	0.00246295
CXCL8	11686.1	2.27904	0.577241	-3.94816	7.88e-05	0.0296515
DAPL1	393.158	-1.90475	0.574003	3.31836	0.000905467	0.0922785
DNER	17.8367	2.02383	0.592275	-3.41705	0.00063304	0.076169
DRAM1	1177.54	1.35902	0.32804	-4.14283	3.43e-05	0.0221449
DUSP1	6955.49	1.55703	0.365688	-4.2578	2.06e-05	0.017501
DUSP6	846.361	1.05777	0.278606	-3.79665	0.000146667	0.0394719
EDN1	212.41	1.04814	0.296815	-3.5313	0.00041352	0.0616972
ENSG00000205325	20.5569	3.06258	0.718852	-4.26037	2.04e-05	0.017501
ENSG00000227081	62.396	-1.06581	0.261717	4.07237	4.65e-05	0.0231248
ENSG00000232774	32.3271	1.501	0.415673	-3.61101	0.000305004	0.054282
ENSG00000250771	13.9304	2.44096	0.636672	-3.83393	0.000126111	0.0372072
ENSG00000256249	13.1023	2.4694	0.661521	-3.73292	0.000189272	0.0446825
ENSG00000259952	7.45669	1.37214	0.364318	-3.76632	0.000165673	0.041754
ENSG00000260005	8.56186	1.04406	0.306796	-3.40313	0.000666196	0.0786364
ENSG00000261159	15.5124	-1.69231	0.432296	3.91471	9.05e-05	0.0318505
ENSG00000273132	7.27894	-1.47946	0.439993	3.36245	0.000772542	0.0847524
ENSG00000274021	11.6266	1.06511	0.323857	-3.28883	0.00100606	0.0977237
ENSG00000282150	32.5402	-2.10486	0.565192	3.72415	0.000195975	0.0446831
ENSG00000285517	13.104	1.78945	0.526535	-3.39854	0.000677468	0.0789674
ENSG00000287853	22.676	2.25508	0.597226	-3.77593	0.000159413	0.0412924
ENSG00000289365	10.1112	1.4414	0.396141	-3.6386	0.000274129	0.0515219
EREG	241.526	2.04679	0.625771	-3.27083	0.00107231	0.0997515
FABP4	1980.62	3.33595	0.835312	-3.99366	6.51e-05	0.027577
FCGR2A	991.525	1.29294	0.385227	-3.35629	0.000789947	0.086155
FDCSP	171.817	4.45245	1.05943	-4.20267	2.64e-05	0.0194193
FGA	9.00292	4.85039	1.46806	-3.30394	0.000953358	0.0955921
FN1	16047.4	2.00952	0.473996	-4.23953	2.24e-05	0.0178865
FOLR3	13.5527	2.66691	0.653588	-4.08042	4.5e-05	0.0231248
FPR2	265.708	2.24205	0.620982	-3.6105	0.000305609	0.054282
FSTL3	694.446	1.23818	0.347682	-3.56124	0.000369104	0.0598341
FTH1P7	18.3311	1.53064	0.406367	-3.76664	0.000165456	0.041754
FTH1P8	20.7531	1.25654	0.351279	-3.57705	0.000347496	0.0573521
FTLP3	33.7344	1.21434	0.32724	-3.71087	0.000206546	0.0446831
G0S2	1271.17	2.37304	0.537388	-4.41588	1.01e-05	0.0110365
GALNT15	96.0319	1.65984	0.486117	-3.41449	0.000639019	0.0763955
GDF15	1286.84	1.53185	0.446008	-3.43459	0.00059346	0.0732982
GPR84	87.8341	1.84508	0.423004	-4.36185	1.29e-05	0.012026
GTSF1	20.2171	1.75372	0.49337	-3.55457	0.000378602	0.0598341
H1-5	9.67682	-1.78408	0.467005	3.82026	0.000133313	0.0372072
HAS1	23.9436	2.09615	0.609605	-3.43853	0.000584874	0.0727194
HBA1	54.8218	2.55793	0.662635	-3.86024	0.000113275	0.0370627
HBA2	970.01	2.12577	0.565339	-3.76016	0.000169804	0.0422247
HBB	4071.87	2.1137	0.620021	-3.40907	0.00065184	0.077432
HBEGF	711.741	1.18778	0.331454	-3.58354	0.000338963	0.0569518
HCAR2	1681.83	1.52395	0.459242	-3.3184	0.000905354	0.0922785
HCAR3	461.175	1.84481	0.513172	-3.59492	0.000324494	0.0561946
HLA-DRB4	23.1749	3.13738	0.772103	-4.06343	4.84e-05	0.0231248
HLA-H	142.803	1.80456	0.472448	-3.8196	0.000133667	0.0372072
IBSP	6.481	3.50213	0.870606	-4.02264	5.76e-05	0.0255551
IGF2BP1	89.2387	4.4126	0.904071	-4.88081	1.06e-06	0.00246295
IGKV3D-20	224.451	-1.9174	0.531997	3.60415	0.000313176	0.0551012
IGKV3OR2-268	5.75574	-1.78657	0.510977	3.49638	0.000471614	0.0656387
IGLC7	145.648	-2.07518	0.559727	3.70749	0.000209324	0.0446831
IGLV3-9	204.985	-2.40445	0.591326	4.0662	4.78e-05	0.0231248
IL11	206.6	2.67138	0.577975	-4.62196	3.8e-06	0.00644506
IL19	92.2356	-1.77844	0.465578	3.81985	0.000133534	0.0372072
IL1B	3311.3	3.6064	0.642936	-5.60926	2.03e-08	0.000126319
IL4I1	575.705	1.08412	0.330319	-3.28202	0.00103065	0.0987248
IL6	222.105	3.60669	0.607878	-5.93325	2.97e-09	5.54e-05
INHBA	833.973	1.4815	0.403733	-3.66949	0.00024303	0.0487367
ITGA5	2859.3	1.29629	0.356345	-3.63775	0.000275033	0.0515219
ITGAX	865.077	1.42781	0.414526	-3.44443	0.00057226	0.0717778
ITGB3	183.86	2.55209	0.491821	-5.18907	2.11e-07	0.000788315
KCNK13	32.5173	1.19089	0.321292	-3.70657	0.000210084	0.0446831
L1CAM	340.693	2.6763	0.584849	-4.57604	4.74e-06	0.00736442
LINC01088	15.5756	-1.73327	0.502296	3.4507	0.000559141	0.0714245
LINC02154	23.5086	2.39995	0.660113	-3.63567	0.000277264	0.0515219
LINC02345	15.684	1.98148	0.533406	-3.71477	0.000203388	0.0446831
LINC02487	28.7826	-2.83221	0.81427	3.47822	0.000504751	0.0677238
LONRF3	67.9767	1.43707	0.370114	-3.88277	0.000103274	0.0343939
MAGEA1	142.813	8.87974	1.87359	-4.73943	2.14e-06	0.00444115
MAGEA6	14.8819	6.26042	1.7215	-3.6366	0.000276256	0.0515219
MCEMP1	51.4271	2.11733	0.61799	-3.42616	0.000612188	0.074623
MEFV	149.495	1.68394	0.483706	-3.48133	0.000498922	0.0677238
MME	1324.52	2.13575	0.5295	-4.03352	5.49e-05	0.0249949
MMP3	988.78	2.01924	0.544173	-3.71066	0.000206717	0.0446831
NKAIN2	6.42094	-4.50608	0.80259	5.61442	1.97e-08	0.000126319
NLRP3	181.612	1.98716	0.447145	-4.44411	8.83e-06	0.0102876
NNMT	1714.38	1.70791	0.445961	-3.82974	0.000128279	0.0372072
NOG	21.3529	2.11742	0.598819	-3.53599	0.00040625	0.0611013
NOS1	32.0275	-2.48021	0.704366	3.52119	0.000429609	0.0630882
NT5E	662.721	1.63617	0.398351	-4.10736	4e-05	0.0231248
NTN4	811.185	1.06727	0.32412	-3.29283	0.000991861	0.0971579
OLR1	661.585	2.39445	0.527888	-4.53591	5.74e-06	0.00822828
OSM	865.27	3.45936	0.638434	-5.41851	6.01e-08	0.0002802
PACSIN1	32.8594	-1.43987	0.405373	3.55196	0.00038237	0.0598341
PCDHB9	122.865	1.61712	0.422127	-3.8309	0.000127677	0.0372072
PDE4B	742.273	1.69819	0.426591	-3.98084	6.87e-05	0.0284608
PHYHIPL	28.0446	1.96667	0.593545	-3.31343	0.000921587	0.0934109
PITPNA-AS1	7.62403	-1.35332	0.404975	3.34173	0.000832572	0.0887284
PIWIL2	34.7014	3.49072	0.712033	-4.90247	9.46e-07	0.00246295
PKIB	91.792	1.19445	0.314067	-3.80319	0.000142847	0.039178
PLAUR	1986.99	1.26417	0.309586	-4.08341	4.44e-05	0.0231248
PPBP	17.305	2.81757	0.811614	-3.47156	0.000517447	0.0684424
PROK2	137.097	3.22757	0.725183	-4.4507	8.56e-06	0.0102876
PTGS2	1448.96	2.20826	0.505111	-4.37183	1.23e-05	0.012026
PTPRN	44.527	2.18023	0.592409	-3.68028	0.000232979	0.0472289
PTPRR	20.705	1.96665	0.570617	-3.44654	0.000567817	0.0717778
PTX3	44.4414	2.37243	0.620849	-3.82126	0.000132771	0.0372072
RAB32	614.989	1.07624	0.296825	-3.62583	0.000288038	0.0526658
RPL41P1	1300.69	-1.04435	0.294851	3.54197	0.000397155	0.0607127
RPS9	44.4456	-1.53916	0.440955	3.49052	0.000482081	0.0665987
S100A7A	471.65	-2.23975	0.674017	3.32298	0.000890599	0.0922785
SAT1	11652.3	1.08177	0.281432	-3.84381	0.00012114	0.0372072
SEMA3B	770.012	1.59605	0.478504	-3.33549	0.000851485	0.0902284
SERPINE1	3313.37	1.96812	0.486507	-4.04542	5.22e-05	0.024352
SIGLEC12	91.029	1.57698	0.416065	-3.79023	0.00015051	0.0395354
SLC11A1	436.206	1.51893	0.405628	-3.74464	0.00018065	0.0432229
SLC22A4	63.6102	1.35425	0.342627	-3.95255	7.73e-05	0.0296515
SLC2A3	1863.32	2.09001	0.464679	-4.49776	6.87e-06	0.00914812
SLC4A4	71.3837	2.14183	0.602647	-3.55403	0.000379369	0.0598341
SLC7A2	728.697	1.9572	0.538575	-3.63404	0.00027902	0.0515219
SNAI1	149.518	1.71377	0.413757	-4.14196	3.44e-05	0.0221449
SOCS3	4745.14	1.61818	0.410584	-3.94117	8.11e-05	0.0296515
SPINK6	144.319	3.421	0.933677	-3.66401	0.000248301	0.0489699
SRGN	3146.67	1.19427	0.353582	-3.37764	0.000731096	0.082636
SYN1	35.9244	1.70178	0.511972	-3.32396	0.000887483	0.0922785
TG	60.2724	1.4079	0.415503	-3.38843	0.000702945	0.0799386
TGFB2	368.016	1.48661	0.413924	-3.59149	0.000328794	0.0562569
TGFBI	6961.43	1.42189	0.360641	-3.94268	8.06e-05	0.0296515
THBS1	3191.22	1.1052	0.325904	-3.39117	0.000695951	0.0796288
TIMP1	6046.61	1.97139	0.425257	-4.63576	3.56e-06	0.00644506
TMEM52B	49.1228	1.81362	0.472868	-3.83536	0.000125378	0.0372072
TNFAIP6	316.499	1.93274	0.487807	-3.96209	7.43e-05	0.0296515
TREM1	503.222	2.16756	0.557251	-3.88973	0.000100356	0.0343939
VTN	11.0544	2.32783	0.635994	-3.66015	0.00025207	0.0489699
ZFP36	7216.65	1.23829	0.348797	-3.55016	0.000384991	0.0598341

## Sheet: TableS3
ID	Description	GeneRatio	BgRatio	pvalue	p.adjust	qvalue	Count	geneID
GO:0015844	monoamine transport	2/11	84/18903	0.00104562	0.0846718	0.0527768	2	ADRA2B/NOS1
GO:0002028	regulation of sodium ion transport	2/11	92/18903	0.0012524	0.0846718	0.0527768	2	NKAIN2/NOS1
GO:0031058	positive regulation of histone modification	2/11	102/18903	0.00153623	0.0846718	0.0527768	2	H1-5/NOS1
GO:0051051	negative regulation of transport	3/11	479/18903	0.00229235	0.0846718	0.0527768	3	ADRA2B/NOS1/PACSIN1
GO:0035296	regulation of tube diameter	2/11	147/18903	0.00315501	0.0846718	0.0527768	2	ADRA2B/NOS1
GO:0097746	blood vessel diameter maintenance	2/11	147/18903	0.00315501	0.0846718	0.0527768	2	ADRA2B/NOS1
GO:0035150	regulation of tube size	2/11	148/18903	0.00319722	0.0846718	0.0527768	2	ADRA2B/NOS1
GO:0043271	negative regulation of ion transport	2/11	167/18903	0.00404947	0.0846718	0.0527768	2	ADRA2B/NOS1
GO:0006937	regulation of muscle contraction	2/11	174/18903	0.00438737	0.0846718	0.0527768	2	ADRA2B/NOS1
GO:0031056	regulation of histone modification	2/11	175/18903	0.00443668	0.0846718	0.0527768	2	H1-5/NOS1
GO:0008217	regulation of blood pressure	2/11	191/18903	0.0052608	0.0846718	0.0527768	2	ADRA2B/NOS1
GO:0003056	regulation of vascular associated smooth muscle contraction	1/11	10/18903	0.00580535	0.0846718	0.0527768	1	ADRA2B
GO:0048241	epinephrine transport	1/11	10/18903	0.00580535	0.0846718	0.0527768	1	ADRA2B
GO:0070472	regulation of uterine smooth muscle contraction	1/11	10/18903	0.00580535	0.0846718	0.0527768	1	ADRA2B
GO:0006527	arginine catabolic process	1/11	11/18903	0.00638419	0.0846718	0.0527768	1	NOS1
GO:0051574	positive regulation of histone H3-K9 methylation	1/11	11/18903	0.00638419	0.0846718	0.0527768	1	H1-5
GO:0051610	serotonin uptake	1/11	11/18903	0.00638419	0.0846718	0.0527768	1	NOS1
GO:0070471	uterine smooth muscle contraction	1/11	11/18903	0.00638419	0.0846718	0.0527768	1	ADRA2B
GO:0002377	immunoglobulin production	2/11	219/18903	0.0068597	0.0846718	0.0527768	2	IGKV3D-20/IGLV3-9
GO:0031284	positive regulation of guanylate cyclase activity	1/11	12/18903	0.00696273	0.0846718	0.0527768	1	NOS1
GO:0033604	negative regulation of catecholamine secretion	1/11	13/18903	0.00754097	0.0846718	0.0527768	1	ADRA2B
GO:0051481	negative regulation of cytosolic calcium ion concentration	1/11	13/18903	0.00754097	0.0846718	0.0527768	1	NOS1
GO:0014061	regulation of norepinephrine secretion	1/11	14/18903	0.00811889	0.0846718	0.0527768	1	ADRA2B
GO:0042136	neurotransmitter biosynthetic process	1/11	14/18903	0.00811889	0.0846718	0.0527768	1	NOS1
GO:0048243	norepinephrine secretion	1/11	14/18903	0.00811889	0.0846718	0.0527768	1	ADRA2B
GO:0010989	negative regulation of low-density lipoprotein particle clearance	1/11	15/18903	0.00869651	0.0846718	0.0527768	1	IL19
GO:0031282	regulation of guanylate cyclase activity	1/11	15/18903	0.00869651	0.0846718	0.0527768	1	NOS1
GO:0051589	negative regulation of neurotransmitter transport	1/11	15/18903	0.00869651	0.0846718	0.0527768	1	NOS1
GO:0006814	sodium ion transport	2/11	255/18903	0.00920059	0.0846718	0.0527768	2	NKAIN2/NOS1
GO:0090257	regulation of muscle system process	2/11	256/18903	0.00927009	0.0846718	0.0527768	2	ADRA2B/NOS1
GO:1903522	regulation of blood circulation	2/11	263/18903	0.00976328	0.0846718	0.0527768	2	ADRA2B/NOS1
GO:0017014	protein nitrosylation	1/11	17/18903	0.00985084	0.0846718	0.0527768	1	NOS1
GO:0018119	peptidyl-cysteine S-nitrosylation	1/11	17/18903	0.00985084	0.0846718	0.0527768	1	NOS1
GO:1900006	positive regulation of dendrite development	1/11	17/18903	0.00985084	0.0846718	0.0527768	1	PACSIN1
GO:1902514	regulation of calcium ion transmembrane transport via high voltage-gated calcium channel	1/11	17/18903	0.00985084	0.0846718	0.0527768	1	NOS1
GO:0003018	vascular process in circulatory system	2/11	270/18903	0.0102681	0.0846718	0.0527768	2	ADRA2B/NOS1
GO:0010522	regulation of calcium ion transport into cytosol	1/11	18/18903	0.0104275	0.0846718	0.0527768	1	NOS1
GO:0051580	regulation of neurotransmitter uptake	1/11	18/18903	0.0104275	0.0846718	0.0527768	1	NOS1
GO:0006837	serotonin transport	1/11	19/18903	0.0110039	0.0846718	0.0527768	1	NOS1
GO:0010985	negative regulation of lipoprotein particle clearance	1/11	19/18903	0.0110039	0.0846718	0.0527768	1	IL19
GO:0061577	calcium ion transmembrane transport via high voltage-gated calcium channel	1/11	19/18903	0.0110039	0.0846718	0.0527768	1	NOS1
GO:0006525	arginine metabolic process	1/11	20/18903	0.01158	0.0846718	0.0527768	1	NOS1
GO:0097320	plasma membrane tubulation	1/11	20/18903	0.01158	0.0846718	0.0527768	1	PACSIN1
GO:0015850	organic hydroxy compound transport	2/11	292/18903	0.0119294	0.0846718	0.0527768	2	ADRA2B/NOS1
GO:0006450	regulation of translational fidelity	1/11	21/18903	0.0121558	0.0846718	0.0527768	1	RPS9
GO:1902307	positive regulation of sodium ion transmembrane transport	1/11	21/18903	0.0121558	0.0846718	0.0527768	1	NOS1
GO:0010988	regulation of low-density lipoprotein particle clearance	1/11	22/18903	0.0127313	0.0846718	0.0527768	1	IL19
GO:0015874	norepinephrine transport	1/11	22/18903	0.0127313	0.0846718	0.0527768	1	ADRA2B
GO:0002026	regulation of the force of heart contraction	1/11	26/18903	0.0150302	0.0846718	0.0527768	1	NOS1
GO:0030810	positive regulation of nucleotide biosynthetic process	1/11	26/18903	0.0150302	0.0846718	0.0527768	1	NOS1
GO:0042178	xenobiotic catabolic process	1/11	26/18903	0.0150302	0.0846718	0.0527768	1	NOS1
GO:0051570	regulation of histone H3-K9 methylation	1/11	26/18903	0.0150302	0.0846718	0.0527768	1	H1-5
GO:0060314	regulation of ryanodine-sensitive calcium-release channel activity	1/11	26/18903	0.0150302	0.0846718	0.0527768	1	NOS1
GO:1900373	positive regulation of purine nucleotide biosynthetic process	1/11	26/18903	0.0150302	0.0846718	0.0527768	1	NOS1
GO:0002440	production of molecular mediator of immune response	2/11	333/18903	0.0153205	0.0846718	0.0527768	2	IGKV3D-20/IGLV3-9
GO:0009065	glutamine family amino acid catabolic process	1/11	27/18903	0.0156042	0.0846718	0.0527768	1	NOS1
GO:0014829	vascular associated smooth muscle contraction	1/11	27/18903	0.0156042	0.0846718	0.0527768	1	ADRA2B
GO:0042133	neurotransmitter metabolic process	1/11	27/18903	0.0156042	0.0846718	0.0527768	1	NOS1
GO:0051953	negative regulation of amine transport	1/11	27/18903	0.0156042	0.0846718	0.0527768	1	ADRA2B
GO:0070199	establishment of protein localization to chromosome	1/11	27/18903	0.0156042	0.0846718	0.0527768	1	H1-5
GO:0071880	adenylate cyclase-activating adrenergic receptor signaling pathway	1/11	27/18903	0.0156042	0.0846718	0.0527768	1	ADRA2B
GO:0007263	nitric oxide mediated signal transduction	1/11	29/18903	0.0167512	0.0875451	0.0545678	1	NOS1
GO:0060402	calcium ion transport into cytosol	1/11	29/18903	0.0167512	0.0875451	0.0545678	1	NOS1
GO:0006936	muscle contraction	2/11	351/18903	0.0169272	0.0875451	0.0545678	2	ADRA2B/NOS1
GO:0032148	activation of protein kinase B activity	1/11	31/18903	0.017897	0.089756	0.0559459	1	ADRA2B
GO:0045987	positive regulation of smooth muscle contraction	1/11	31/18903	0.017897	0.089756	0.0559459	1	ADRA2B
GO:0071875	adrenergic receptor signaling pathway	1/11	33/18903	0.0190415	0.091437	0.0569937	1	ADRA2B
GO:0010765	positive regulation of sodium ion transport	1/11	34/18903	0.0196134	0.091437	0.0569937	1	NOS1
GO:0010984	regulation of lipoprotein particle clearance	1/11	34/18903	0.0196134	0.091437	0.0569937	1	IL19
GO:0034383	low-density lipoprotein particle clearance	1/11	34/18903	0.0196134	0.091437	0.0569937	1	IL19
GO:0035066	positive regulation of histone acetylation	1/11	34/18903	0.0196134	0.091437	0.0569937	1	NOS1
GO:0051567	histone H3-K9 methylation	1/11	35/18903	0.0201849	0.0927945	0.0578398	1	H1-5
GO:0045777	positive regulation of blood pressure	1/11	36/18903	0.0207561	0.0928417	0.0578692	1	ADRA2B
GO:0098810	neurotransmitter reuptake	1/11	36/18903	0.0207561	0.0928417	0.0578692	1	NOS1
GO:0043267	negative regulation of potassium ion transport	1/11	40/18903	0.023038	0.0969444	0.0604265	1	NOS1
GO:2000758	positive regulation of peptidyl-lysine acetylation	1/11	40/18903	0.023038	0.0969444	0.0604265	1	NOS1
GO:0018205	peptidyl-lysine modification	2/11	414/18903	0.0230928	0.0969444	0.0604265	2	H1-5/NOS1
GO:0045454	cell redox homeostasis	1/11	41/18903	0.0236078	0.0969444	0.0604265	1	NOS1
GO:0010959	regulation of metal ion transport	2/11	423/18903	0.0240402	0.0969444	0.0604265	2	NKAIN2/NOS1
GO:1900371	regulation of purine nucleotide biosynthetic process	1/11	43/18903	0.0247463	0.0969444	0.0604265	1	NOS1
GO:0001504	neurotransmitter uptake	1/11	44/18903	0.0253151	0.0969444	0.0604265	1	NOS1
GO:0030808	regulation of nucleotide biosynthetic process	1/11	44/18903	0.0253151	0.0969444	0.0604265	1	NOS1
GO:0045910	negative regulation of DNA recombination	1/11	45/18903	0.0258836	0.0969444	0.0604265	1	H1-5
GO:2000273	positive regulation of signaling receptor activity	1/11	46/18903	0.0264518	0.0969444	0.0604265	1	ADRA2B
GO:0061647	histone H3-K9 modification	1/11	47/18903	0.0270197	0.0969444	0.0604265	1	H1-5
GO:0003012	muscle system process	2/11	455/18903	0.0275387	0.0969444	0.0604265	2	ADRA2B/NOS1
GO:0045776	negative regulation of blood pressure	1/11	48/18903	0.0275873	0.0969444	0.0604265	1	NOS1
GO:0045981	positive regulation of nucleotide metabolic process	1/11	48/18903	0.0275873	0.0969444	0.0604265	1	NOS1
GO:1900544	positive regulation of purine nucleotide metabolic process	1/11	48/18903	0.0275873	0.0969444	0.0604265	1	NOS1
GO:0030261	chromosome condensation	1/11	49/18903	0.0281546	0.0969444	0.0604265	1	H1-5
GO:0031281	positive regulation of cyclase activity	1/11	49/18903	0.0281546	0.0969444	0.0604265	1	NOS1
GO:0034198	cellular response to amino acid starvation	1/11	49/18903	0.0281546	0.0969444	0.0604265	1	DAPL1
GO:0042311	vasodilation	1/11	49/18903	0.0281546	0.0969444	0.0604265	1	NOS1
GO:0045933	positive regulation of muscle contraction	1/11	49/18903	0.0281546	0.0969444	0.0604265	1	ADRA2B
GO:0007520	myoblast fusion	1/11	50/18903	0.0287216	0.0969444	0.0604265	1	NOS1
GO:0018198	peptidyl-cysteine modification	1/11	50/18903	0.0287216	0.0969444	0.0604265	1	NOS1
GO:0051349	positive regulation of lyase activity	1/11	50/18903	0.0287216	0.0969444	0.0604265	1	NOS1
GO:0031062	positive regulation of histone methylation	1/11	51/18903	0.0292883	0.0969444	0.0604265	1	H1-5
GO:1901985	positive regulation of protein acetylation	1/11	51/18903	0.0292883	0.0969444	0.0604265	1	NOS1
GO:1990928	response to amino acid starvation	1/11	51/18903	0.0292883	0.0969444	0.0604265	1	DAPL1
GO:0016570	histone modification	2/11	474/18903	0.0297097	0.0973655	0.0606889	2	H1-5/NOS1
GO:0034381	plasma lipoprotein particle clearance	1/11	53/18903	0.0304208	0.0987186	0.0615324	1	IL19
GO:0071168	protein localization to chromatin	1/11	54/18903	0.0309867	0.0995785	0.0620683	1	H1-5
GO:0015695	organic cation transport	1/11	56/18903	0.0321174	0.100291	0.0625124	1	ADRA2B
GO:0045806	negative regulation of endocytosis	1/11	56/18903	0.0321174	0.100291	0.0625124	1	PACSIN1
GO:1903170	negative regulation of calcium ion transmembrane transport	1/11	56/18903	0.0321174	0.100291	0.0625124	1	NOS1
GO:0050433	regulation of catecholamine secretion	1/11	57/18903	0.0326823	0.101101	0.0630174	1	ADRA2B
GO:0050432	catecholamine secretion	1/11	58/18903	0.0332469	0.101895	0.0635125	1	ADRA2B
GO:2001244	positive regulation of intrinsic apoptotic signaling pathway	1/11	63/18903	0.0360654	0.107726	0.0671467	1	IL19
GO:0000768	syncytium formation by plasma membrane fusion	1/11	64/18903	0.0366282	0.107726	0.0671467	1	NOS1
GO:0019229	regulation of vasoconstriction	1/11	64/18903	0.0366282	0.107726	0.0671467	1	ADRA2B
GO:0140253	cell-cell fusion	1/11	64/18903	0.0366282	0.107726	0.0671467	1	NOS1
GO:0006940	regulation of smooth muscle contraction	1/11	65/18903	0.0371907	0.107726	0.0671467	1	ADRA2B
GO:0035065	regulation of histone acetylation	1/11	65/18903	0.0371907	0.107726	0.0671467	1	NOS1
GO:0048488	synaptic vesicle endocytosis	1/11	66/18903	0.0377529	0.107726	0.0671467	1	PACSIN1
GO:0140238	presynaptic endocytosis	1/11	66/18903	0.0377529	0.107726	0.0671467	1	PACSIN1
GO:0006949	syncytium formation	1/11	68/18903	0.0388764	0.109984	0.068554	1	NOS1
GO:1902305	regulation of sodium ion transmembrane transport	1/11	69/18903	0.0394377	0.110626	0.0689545	1	NOS1
GO:0051937	catecholamine transport	1/11	73/18903	0.04168	0.115549	0.0720227	1	ADRA2B
GO:0051926	negative regulation of calcium ion transport	1/11	74/18903	0.0422398	0.115549	0.0720227	1	NOS1
GO:2000756	regulation of peptidyl-lysine acetylation	1/11	74/18903	0.0422398	0.115549	0.0720227	1	NOS1
GO:0006809	nitric oxide biosynthetic process	1/11	76/18903	0.0433586	0.11668	0.0727282	1	NOS1
GO:0051339	regulation of lyase activity	1/11	76/18903	0.0433586	0.11668	0.0727282	1	NOS1
GO:0031279	regulation of cyclase activity	1/11	77/18903	0.0439175	0.116838	0.0728265	1	NOS1
GO:0009064	glutamine family amino acid metabolic process	1/11	78/18903	0.0444762	0.116838	0.0728265	1	NOS1
GO:0055117	regulation of cardiac muscle contraction	1/11	78/18903	0.0444762	0.116838	0.0728265	1	NOS1
GO:0036465	synaptic vesicle recycling	1/11	79/18903	0.0450345	0.117373	0.0731601	1	PACSIN1
GO:0031060	regulation of histone methylation	1/11	81/18903	0.0461503	0.117629	0.0733195	1	H1-5
GO:0033555	multicellular organismal response to stress	1/11	81/18903	0.0461503	0.117629	0.0733195	1	NOS1
GO:0046209	nitric oxide metabolic process	1/11	82/18903	0.0467078	0.117629	0.0733195	1	NOS1
GO:0051279	regulation of release of sequestered calcium ion into cytosol	1/11	82/18903	0.0467078	0.117629	0.0733195	1	NOS1
GO:0042310	vasoconstriction	1/11	83/18903	0.0472649	0.117629	0.0733195	1	ADRA2B
GO:2001057	reactive nitrogen species metabolic process	1/11	83/18903	0.0472649	0.117629	0.0733195	1	NOS1
GO:0097006	regulation of plasma lipoprotein particle levels	1/11	84/18903	0.0478218	0.118127	0.0736298	1	IL19
GO:0010507	negative regulation of autophagy	1/11	87/18903	0.0494906	0.121344	0.0756347	1	DAPL1
GO:1901983	regulation of protein acetylation	1/11	88/18903	0.0500463	0.121804	0.0759216	1	NOS1
GO:0045666	positive regulation of neuron differentiation	1/11	93/18903	0.0528202	0.127617	0.0795448	1	ADRA2B
GO:1900542	regulation of purine nucleotide metabolic process	1/11	94/18903	0.0533741	0.128021	0.0797965	1	NOS1
GO:1901606	alpha-amino acid catabolic process	1/11	95/18903	0.0539277	0.128418	0.0800442	1	NOS1
GO:0006942	regulation of striated muscle contraction	1/11	97/18903	0.0550341	0.129945	0.0809959	1	NOS1
GO:0051952	regulation of amine transport	1/11	98/18903	0.0555868	0.129945	0.0809959	1	ADRA2B
GO:0006140	regulation of nucleotide metabolic process	1/11	99/18903	0.0561392	0.129945	0.0809959	1	NOS1
GO:2001237	negative regulation of extrinsic apoptotic signaling pathway	1/11	99/18903	0.0561392	0.129945	0.0809959	1	IL19
GO:1901019	regulation of calcium ion transmembrane transporter activity	1/11	102/18903	0.0577948	0.132278	0.0824501	1	NOS1
GO:0006910	phagocytosis, recognition	1/11	103/18903	0.058346	0.132278	0.0824501	1	IGLC7
GO:0050773	regulation of dendrite development	1/11	103/18903	0.058346	0.132278	0.0824501	1	PACSIN1
GO:0051588	regulation of neurotransmitter transport	1/11	105/18903	0.0594477	0.133284	0.0830775	1	NOS1
GO:0006958	complement activation, classical pathway	1/11	106/18903	0.0599981	0.133284	0.0830775	1	IGLC7
GO:0015837	amine transport	1/11	106/18903	0.0599981	0.133284	0.0830775	1	ADRA2B
GO:0033138	positive regulation of peptidyl-serine phosphorylation	1/11	108/18903	0.0610979	0.134823	0.0840365	1	NOS1
GO:1904063	negative regulation of cation transmembrane transport	1/11	109/18903	0.0616474	0.135134	0.0842307	1	NOS1
GO:0006939	smooth muscle contraction	1/11	113/18903	0.0638425	0.136908	0.0853363	1	ADRA2B
GO:0009063	cellular amino acid catabolic process	1/11	113/18903	0.0638425	0.136908	0.0853363	1	NOS1
GO:0009408	response to heat	1/11	114/18903	0.0643906	0.136908	0.0853363	1	NOS1
GO:0043266	regulation of potassium ion transport	1/11	114/18903	0.0643906	0.136908	0.0853363	1	NOS1
GO:0034502	protein localization to chromosome	1/11	115/18903	0.0649383	0.136908	0.0853363	1	H1-5
GO:0034766	negative regulation of ion transmembrane transport	1/11	115/18903	0.0649383	0.136908	0.0853363	1	NOS1
GO:0006805	xenobiotic metabolic process	1/11	118/18903	0.0665798	0.139481	0.0869397	1	NOS1
GO:0002455	humoral immune response mediated by circulating immunoglobulin	1/11	119/18903	0.0671264	0.139741	0.0871022	1	IGLC7
GO:0006334	nucleosome assembly	1/11	121/18903	0.0682187	0.141127	0.0879663	1	H1-5
GO:0051209	release of sequestered calcium ion into cytosol	1/11	124/18903	0.069855	0.143615	0.0895167	1	NOS1
GO:0051283	negative regulation of sequestering of calcium ion	1/11	125/18903	0.0703998	0.143842	0.089658	1	NOS1
GO:0006911	phagocytosis, engulfment	1/11	127/18903	0.0714887	0.144285	0.0899344	1	IGLC7
GO:0051282	regulation of sequestering of calcium ion	1/11	127/18903	0.0714887	0.144285	0.0899344	1	NOS1
GO:0014902	myotube differentiation	1/11	129/18903	0.0725763	0.144688	0.0901855	1	NOS1
GO:0034968	histone lysine methylation	1/11	130/18903	0.0731197	0.144688	0.0901855	1	H1-5
GO:0050853	B cell receptor signaling pathway	1/11	130/18903	0.0731197	0.144688	0.0901855	1	IGLC7
GO:0051208	sequestering of calcium ion	1/11	131/18903	0.0736628	0.144688	0.0901855	1	NOS1
GO:0006956	complement activation	1/11	132/18903	0.0742056	0.144688	0.0901855	1	IGLC7
GO:0000018	regulation of DNA recombination	1/11	133/18903	0.0747481	0.144688	0.0901855	1	H1-5
GO:0030168	platelet activation	1/11	133/18903	0.0747481	0.144688	0.0901855	1	ADRA2B
GO:2001235	positive regulation of apoptotic signaling pathway	1/11	135/18903	0.0758323	0.145933	0.0909617	1	IL19
GO:0099024	plasma membrane invagination	1/11	136/18903	0.076374	0.146126	0.0910818	1	IGLC7
GO:0060048	cardiac muscle contraction	1/11	140/18903	0.0785377	0.149402	0.093124	1	NOS1
GO:0010324	membrane invagination	1/11	143/18903	0.0801575	0.149899	0.0934337	1	IGLC7
GO:0033135	regulation of peptidyl-serine phosphorylation	1/11	143/18903	0.0801575	0.149899	0.0934337	1	NOS1
GO:0045727	positive regulation of translation	1/11	143/18903	0.0801575	0.149899	0.0934337	1	RPS9
GO:0018022	peptidyl-lysine methylation	1/11	144/18903	0.0806969	0.15006	0.0935339	1	H1-5
GO:0032147	activation of protein kinase activity	1/11	148/18903	0.0828514	0.153206	0.0954947	1	ADRA2B
GO:0051053	negative regulation of DNA metabolic process	1/11	149/18903	0.0833893	0.153344	0.0955808	1	H1-5
GO:1903531	negative regulation of secretion by cell	1/11	151/18903	0.0844643	0.154377	0.0962248	1	ADRA2B
GO:0062013	positive regulation of small molecule metabolic process	1/11	152/18903	0.0850014	0.154377	0.0962248	1	NOS1
GO:0034763	negative regulation of transmembrane transport	1/11	154/18903	0.0860746	0.154377	0.0962248	1	NOS1
GO:0050871	positive regulation of B cell activation	1/11	155/18903	0.0866108	0.154377	0.0962248	1	IGLC7
GO:2001236	regulation of extrinsic apoptotic signaling pathway	1/11	155/18903	0.0866108	0.154377	0.0962248	1	IL19
GO:0034728	nucleosome organization	1/11	156/18903	0.0871467	0.154377	0.0962248	1	H1-5
GO:0007189	adenylate cyclase-activating G protein-coupled receptor signaling pathway	1/11	157/18903	0.0876824	0.154377	0.0962248	1	ADRA2B
GO:0010976	positive regulation of neuron projection development	1/11	157/18903	0.0876824	0.154377	0.0962248	1	PACSIN1
GO:0002181	cytoplasmic translation	1/11	161/18903	0.089822	0.157307	0.0980513	1	RPS9
GO:0007009	plasma membrane organization	1/11	166/18903	0.0924901	0.160368	0.0999588	1	PACSIN1
GO:0016571	histone methylation	1/11	167/18903	0.0930229	0.160368	0.0999588	1	H1-5
GO:0030307	positive regulation of cell growth	1/11	167/18903	0.0930229	0.160368	0.0999588	1	H1-5
GO:0034250	positive regulation of cellular amide metabolic process	1/11	170/18903	0.0946195	0.162275	0.101148	1	RPS9
GO:1904064	positive regulation of cation transmembrane transport	1/11	171/18903	0.0951512	0.162346	0.101192	1	NOS1
GO:2001242	regulation of intrinsic apoptotic signaling pathway	1/11	172/18903	0.0956825	0.162415	0.101235	1	IL19
GO:0009267	cellular response to starvation	1/11	175/18903	0.0972749	0.162616	0.10136	1	DAPL1
GO:0010469	regulation of signaling receptor activity	1/11	175/18903	0.0972749	0.162616	0.10136	1	ADRA2B
GO:0051048	negative regulation of secretion	1/11	175/18903	0.0972749	0.162616	0.10136	1	ADRA2B
GO:0016573	histone acetylation	1/11	180/18903	0.0999232	0.165647	0.10325	1	NOS1
GO:0006941	striated muscle contraction	1/11	181/18903	0.100452	0.165647	0.10325	1	NOS1
GO:0097553	calcium ion transmembrane import into cytosol	1/11	182/18903	0.100981	0.165647	0.10325	1	NOS1
GO:0071466	cellular response to xenobiotic stimulus	1/11	183/18903	0.101509	0.165647	0.10325	1	NOS1
GO:0035725	sodium ion transmembrane transport	1/11	184/18903	0.102037	0.165647	0.10325	1	NOS1
GO:0009266	response to temperature stimulus	1/11	186/18903	0.103092	0.165647	0.10325	1	NOS1
GO:0018393	internal peptidyl-lysine acetylation	1/11	186/18903	0.103092	0.165647	0.10325	1	NOS1
GO:0034767	positive regulation of ion transmembrane transport	1/11	186/18903	0.103092	0.165647	0.10325	1	NOS1
GO:0006475	internal protein amino acid acetylation	1/11	188/18903	0.104146	0.165732	0.103302	1	NOS1
GO:1903169	regulation of calcium ion transmembrane transport	1/11	188/18903	0.104146	0.165732	0.103302	1	NOS1
GO:0007565	female pregnancy	1/11	189/18903	0.104672	0.165773	0.103328	1	ADRA2B
GO:0099504	synaptic vesicle cycle	1/11	192/18903	0.10625	0.167471	0.104386	1	PACSIN1
GO:0045664	regulation of neuron differentiation	1/11	196/18903	0.10835	0.16919	0.105458	1	ADRA2B
GO:0018394	peptidyl-lysine acetylation	1/11	197/18903	0.108875	0.16919	0.105458	1	NOS1
GO:2001257	regulation of cation channel activity	1/11	197/18903	0.108875	0.16919	0.105458	1	NOS1
GO:0050864	regulation of B cell activation	1/11	204/18903	0.112537	0.17321	0.107964	1	IGLC7
GO:0007204	positive regulation of cytosolic calcium ion concentration	1/11	205/18903	0.113059	0.17321	0.107964	1	NOS1
GO:1901605	alpha-amino acid metabolic process	1/11	205/18903	0.113059	0.17321	0.107964	1	NOS1
GO:0006479	protein methylation	1/11	208/18903	0.114623	0.17321	0.107964	1	H1-5
GO:0008213	protein alkylation	1/11	208/18903	0.114623	0.17321	0.107964	1	H1-5
GO:0030100	regulation of endocytosis	1/11	209/18903	0.115144	0.17321	0.107964	1	PACSIN1
GO:0044703	multi-organism reproductive process	1/11	209/18903	0.115144	0.17321	0.107964	1	ADRA2B
GO:0042594	response to starvation	1/11	211/18903	0.116185	0.17321	0.107964	1	DAPL1
GO:0006836	neurotransmitter transport	1/11	212/18903	0.116706	0.17321	0.107964	1	NOS1
GO:0099003	vesicle-mediated transport in synapse	1/11	212/18903	0.116706	0.17321	0.107964	1	PACSIN1
GO:0008016	regulation of heart contraction	1/11	214/18903	0.117745	0.17321	0.107964	1	NOS1
GO:0050821	protein stabilization	1/11	214/18903	0.117745	0.17321	0.107964	1	H1-5
GO:0016064	immunoglobulin mediated immune response	1/11	215/18903	0.118264	0.17321	0.107964	1	IGLC7
GO:0019724	B cell mediated immunity	1/11	218/18903	0.11982	0.173939	0.108418	1	IGLC7
GO:0044706	multi-multicellular organism process	1/11	218/18903	0.11982	0.173939	0.108418	1	ADRA2B
GO:0001505	regulation of neurotransmitter levels	1/11	219/18903	0.120339	0.173939	0.108418	1	NOS1
GO:0097191	extrinsic apoptotic signaling pathway	1/11	224/18903	0.122925	0.176722	0.110153	1	IL19
GO:0007596	blood coagulation	1/11	225/18903	0.123442	0.176722	0.110153	1	ADRA2B
GO:0051651	maintenance of location in cell	1/11	226/18903	0.123958	0.176722	0.110153	1	NOS1
GO:0006473	protein acetylation	1/11	230/18903	0.12602	0.176722	0.110153	1	NOS1
GO:0008037	cell recognition	1/11	230/18903	0.12602	0.176722	0.110153	1	IGLC7
GO:0050817	coagulation	1/11	230/18903	0.12602	0.176722	0.110153	1	ADRA2B
GO:0007599	hemostasis	1/11	231/18903	0.126535	0.176722	0.110153	1	ADRA2B
GO:0031669	cellular response to nutrient levels	1/11	231/18903	0.126535	0.176722	0.110153	1	DAPL1
GO:2001234	negative regulation of apoptotic signaling pathway	1/11	233/18903	0.127564	0.17741	0.110582	1	IL19
GO:0072593	reactive oxygen species metabolic process	1/11	235/18903	0.128592	0.178023	0.110964	1	IL19
GO:0016358	dendrite development	1/11	237/18903	0.129618	0.178023	0.110964	1	PACSIN1
GO:0034764	positive regulation of transmembrane transport	1/11	237/18903	0.129618	0.178023	0.110964	1	NOS1
GO:0006164	purine nucleotide biosynthetic process	1/11	242/18903	0.13218	0.180004	0.112198	1	NOS1
GO:0065004	protein-DNA complex assembly	1/11	242/18903	0.13218	0.180004	0.112198	1	H1-5
GO:0046395	carboxylic acid catabolic process	1/11	243/18903	0.132692	0.180004	0.112198	1	NOS1
GO:0006813	potassium ion transport	1/11	247/18903	0.134735	0.180321	0.112396	1	NOS1
GO:0016054	organic acid catabolic process	1/11	247/18903	0.134735	0.180321	0.112396	1	NOS1
GO:0031330	negative regulation of cellular catabolic process	1/11	247/18903	0.134735	0.180321	0.112396	1	DAPL1
GO:0007188	adenylate cyclase-modulating G protein-coupled receptor signaling pathway	1/11	248/18903	0.135245	0.180321	0.112396	1	ADRA2B
GO:0060047	heart contraction	1/11	250/18903	0.136265	0.180321	0.112396	1	NOS1
GO:0072522	purine-containing compound biosynthetic process	1/11	251/18903	0.136774	0.180321	0.112396	1	NOS1
GO:0050851	antigen receptor-mediated signaling pathway	1/11	252/18903	0.137283	0.180321	0.112396	1	IGLC7
GO:0098657	import into cell	1/11	252/18903	0.137283	0.180321	0.112396	1	NOS1
GO:0003015	heart process	1/11	261/18903	0.141853	0.184788	0.11518	1	NOS1
GO:0045927	positive regulation of growth	1/11	261/18903	0.141853	0.184788	0.11518	1	H1-5
GO:0031668	cellular response to extracellular stimulus	1/11	262/18903	0.142359	0.184788	0.11518	1	DAPL1
GO:0051924	regulation of calcium ion transport	1/11	268/18903	0.145392	0.187987	0.117174	1	NOS1
GO:0043543	protein acylation	1/11	272/18903	0.147408	0.189852	0.118337	1	NOS1
GO:0071824	protein-DNA complex subunit organization	1/11	277/18903	0.149922	0.192342	0.119889	1	H1-5
GO:0032412	regulation of ion transmembrane transporter activity	1/11	281/18903	0.151929	0.194164	0.121024	1	NOS1
GO:0006874	cellular calcium ion homeostasis	1/11	284/18903	0.153431	0.195215	0.12168	1	NOS1
GO:0072659	protein localization to plasma membrane	1/11	285/18903	0.153931	0.195215	0.12168	1	PACSIN1
GO:0006520	cellular amino acid metabolic process	1/11	289/18903	0.155929	0.196245	0.122322	1	NOS1
GO:0043270	positive regulation of ion transport	1/11	289/18903	0.155929	0.196245	0.122322	1	NOS1
GO:0022898	regulation of transmembrane transporter activity	1/11	291/18903	0.156926	0.196752	0.122638	1	NOS1
GO:0051146	striated muscle cell differentiation	1/11	293/18903	0.157922	0.197254	0.12295	1	NOS1
GO:0001666	response to hypoxia	1/11	296/18903	0.159415	0.19837	0.123646	1	NOS1
GO:0097193	intrinsic apoptotic signaling pathway	1/11	298/18903	0.160408	0.198858	0.12395	1	IL19
GO:0009165	nucleotide biosynthetic process	1/11	304/18903	0.163383	0.20179	0.125778	1	NOS1
GO:1901293	nucleoside phosphate biosynthetic process	1/11	306/18903	0.164372	0.201861	0.125822	1	NOS1
GO:0036293	response to decreased oxygen levels	1/11	309/18903	0.165854	0.201861	0.125822	1	NOS1
GO:0055074	calcium ion homeostasis	1/11	309/18903	0.165854	0.201861	0.125822	1	NOS1
GO:0002429	immune response-activating cell surface receptor signaling pathway	1/11	312/18903	0.167334	0.201861	0.125822	1	IGLC7
GO:0002757	immune response-activating signal transduction	1/11	312/18903	0.167334	0.201861	0.125822	1	IGLC7
GO:0018105	peptidyl-serine phosphorylation	1/11	313/18903	0.167826	0.201861	0.125822	1	NOS1
GO:0006909	phagocytosis	1/11	314/18903	0.168319	0.201861	0.125822	1	IGLC7
GO:0019932	second-messenger-mediated signaling	1/11	314/18903	0.168319	0.201861	0.125822	1	NOS1
GO:0006959	humoral immune response	1/11	320/18903	0.171268	0.204656	0.127564	1	IGLC7
GO:0072503	cellular divalent inorganic cation homeostasis	1/11	323/18903	0.172739	0.205671	0.128197	1	NOS1
GO:0031647	regulation of protein stability	1/11	325/18903	0.173718	0.205938	0.128363	1	H1-5
GO:0032409	regulation of transporter activity	1/11	326/18903	0.174207	0.205938	0.128363	1	NOS1
GO:0071496	cellular response to external stimulus	1/11	328/18903	0.175185	0.206356	0.128624	1	DAPL1
GO:0006310	DNA recombination	1/11	332/18903	0.177137	0.206452	0.128684	1	H1-5
GO:0009895	negative regulation of catabolic process	1/11	332/18903	0.177137	0.206452	0.128684	1	DAPL1
GO:0018209	peptidyl-serine modification	1/11	332/18903	0.177137	0.206452	0.128684	1	NOS1
GO:0070482	response to oxygen levels	1/11	337/18903	0.179571	0.207499	0.129337	1	NOS1
GO:1990778	protein localization to cell periphery	1/11	337/18903	0.179571	0.207499	0.129337	1	PACSIN1
GO:0032496	response to lipopolysaccharide	1/11	339/18903	0.180543	0.207499	0.129337	1	NOS1
GO:0062012	regulation of small molecule metabolic process	1/11	339/18903	0.180543	0.207499	0.129337	1	NOS1
GO:0002768	immune response-regulating cell surface receptor signaling pathway	1/11	341/18903	0.181514	0.20773	0.12948	1	IGLC7
GO:0051235	maintenance of location	1/11	342/18903	0.181999	0.20773	0.12948	1	NOS1
GO:0010506	regulation of autophagy	1/11	344/18903	0.182969	0.207955	0.129621	1	DAPL1
GO:0070588	calcium ion transmembrane transport	1/11	345/18903	0.183453	0.207955	0.129621	1	NOS1
GO:0007517	muscle organ development	1/11	348/18903	0.184904	0.208174	0.129757	1	H1-5
GO:0043414	macromolecule methylation	1/11	348/18903	0.184904	0.208174	0.129757	1	H1-5
GO:0042113	B cell activation	1/11	350/18903	0.18587	0.208553	0.129993	1	IGLC7
GO:0031346	positive regulation of cell projection organization	1/11	352/18903	0.186835	0.208927	0.130227	1	PACSIN1
GO:0072507	divalent inorganic cation homeostasis	1/11	356/18903	0.188762	0.210372	0.131127	1	NOS1
GO:0002237	response to molecule of bacterial origin	1/11	360/18903	0.190685	0.211802	0.132018	1	NOS1
GO:0002449	lymphocyte mediated immunity	1/11	367/18903	0.194041	0.214808	0.133892	1	IGLC7
GO:0006338	chromatin remodeling	1/11	373/18903	0.196907	0.216144	0.134725	1	H1-5
GO:0051346	negative regulation of hydrolase activity	1/11	373/18903	0.196907	0.216144	0.134725	1	NOS1
GO:2001233	regulation of apoptotic signaling pathway	1/11	374/18903	0.197383	0.216144	0.134725	1	IL19
GO:0002460	adaptive immune response based on somatic recombination of immune receptors built from immunoglobulin superfamily domains	1/11	375/18903	0.19786	0.216144	0.134725	1	IGLC7
GO:0042742	defense response to bacterium	1/11	382/18903	0.201188	0.219057	0.13654	1	IGLC7
GO:0044282	small molecule catabolic process	1/11	385/18903	0.20261	0.219882	0.137055	1	NOS1
GO:0032259	methylation	1/11	390/18903	0.204976	0.221	0.137752	1	H1-5
GO:0050878	regulation of body fluid levels	1/11	390/18903	0.204976	0.221	0.137752	1	ADRA2B
GO:1904062	regulation of cation transmembrane transport	1/11	394/18903	0.206864	0.222312	0.138569	1	NOS1
GO:0002253	activation of immune response	1/11	397/18903	0.208278	0.223106	0.139065	1	IGLC7
GO:0051251	positive regulation of lymphocyte activation	1/11	400/18903	0.209689	0.223893	0.139555	1	IGLC7
GO:0042692	muscle cell differentiation	1/11	409/18903	0.213908	0.227664	0.141905	1	NOS1
GO:0006875	cellular metal ion homeostasis	1/11	420/18903	0.219037	0.231634	0.14438	1	NOS1
GO:0045860	positive regulation of protein kinase activity	1/11	420/18903	0.219037	0.231634	0.14438	1	ADRA2B
GO:0001558	regulation of cell growth	1/11	422/18903	0.219967	0.231876	0.144531	1	H1-5
GO:0009410	response to xenobiotic stimulus	1/11	432/18903	0.224598	0.236006	0.147105	1	NOS1
GO:0006816	calcium ion transport	1/11	440/18903	0.228285	0.239122	0.149047	1	NOS1
GO:0042060	wound healing	1/11	442/18903	0.229205	0.239327	0.149175	1	ADRA2B
GO:0010975	regulation of neuron projection development	1/11	446/18903	0.23104	0.240485	0.149897	1	PACSIN1
GO:0072594	establishment of protein localization to organelle	1/11	449/18903	0.232414	0.240877	0.150141	1	H1-5
GO:0002696	positive regulation of leukocyte activation	1/11	450/18903	0.232872	0.240877	0.150141	1	IGLC7
GO:0007015	actin filament organization	1/11	454/18903	0.2347	0.242011	0.150848	1	PACSIN1
GO:0002443	leukocyte mediated immunity	1/11	463/18903	0.238797	0.245472	0.153005	1	IGLC7
GO:0050867	positive regulation of cell activation	1/11	467/18903	0.240612	0.246572	0.153691	1	IGLC7
GO:0023061	signal release	1/11	470/18903	0.241971	0.247199	0.154081	1	ADRA2B
GO:0031667	response to nutrient levels	1/11	474/18903	0.243779	0.248279	0.154755	1	DAPL1
GO:0006163	purine nucleotide metabolic process	1/11	476/18903	0.244681	0.248434	0.154852	1	NOS1
GO:0006417	regulation of translation	1/11	486/18903	0.249179	0.252227	0.157216	1	RPS9
GO:0016049	cell growth	1/11	493/18903	0.252313	0.254421	0.158583	1	H1-5
GO:0033674	positive regulation of kinase activity	1/11	496/18903	0.253653	0.254421	0.158583	1	ADRA2B
GO:0043410	positive regulation of MAPK cascade	1/11	496/18903	0.253653	0.254421	0.158583	1	ADRA2B
GO:0030003	cellular cation homeostasis	1/11	499/18903	0.25499	0.25499	0.158938	1	NOS1

## Sheet: TableS4
ID	Description	GeneRatio	BgRatio	pvalue	p.adjust	qvalue	Count	geneID
GO:0030595	leukocyte chemotaxis	17/114	240/18903	8.17044e-14	1.26253e-10	8.71697e-11	17	CCL20/CCL3L1/CXCL2/CXCL3/CXCL8/DUSP1/EDN1/FPR2/IL1B/IL6/PDE4B/PPBP/SERPINE1/TGFB2/THBS1/TNFAIP6/TREM1
GO:0097529	myeloid leukocyte migration	17/114	242/18903	9.36249e-14	1.26253e-10	8.71697e-11	17	CCL20/CCL3L1/CXCL2/CXCL3/CXCL8/DUSP1/EDN1/FPR2/IL1B/IL6/PDE4B/PPBP/SERPINE1/TGFB2/THBS1/TNFAIP6/TREM1
GO:0060326	cell chemotaxis	18/114	319/18903	7.08274e-13	6.36738e-10	4.39627e-10	18	CCL20/CCL3L1/CXCL2/CXCL3/CXCL8/DUSP1/EDN1/FPR2/HBEGF/IL1B/IL6/PDE4B/PPBP/SERPINE1/TGFB2/THBS1/TNFAIP6/TREM1
GO:0071621	granulocyte chemotaxis	13/114	130/18903	1.00553e-12	6.77979e-10	4.68101e-10	13	CCL20/CCL3L1/CXCL2/CXCL3/CXCL8/EDN1/IL1B/PDE4B/PPBP/TGFB2/THBS1/TNFAIP6/TREM1
GO:0030593	neutrophil chemotaxis	12/114	106/18903	1.75424e-12	9.46237e-10	6.53316e-10	12	CCL20/CCL3L1/CXCL2/CXCL3/CXCL8/EDN1/IL1B/PDE4B/PPBP/TGFB2/TNFAIP6/TREM1
GO:0097530	granulocyte migration	13/114	158/18903	1.23605e-11	5.55606e-09	3.8361e-09	13	CCL20/CCL3L1/CXCL2/CXCL3/CXCL8/EDN1/IL1B/PDE4B/PPBP/TGFB2/THBS1/TNFAIP6/TREM1
GO:1990266	neutrophil migration	12/114	130/18903	2.03715e-11	7.84884e-09	5.41912e-09	12	CCL20/CCL3L1/CXCL2/CXCL3/CXCL8/EDN1/IL1B/PDE4B/PPBP/TGFB2/TNFAIP6/TREM1
GO:0050900	leukocyte migration	18/114	398/18903	2.85082e-11	9.61083e-09	6.63566e-09	18	CCL20/CCL3L1/CXCL2/CXCL3/CXCL8/DUSP1/EDN1/FPR2/IL1B/IL6/ITGB3/PDE4B/PPBP/SERPINE1/TGFB2/THBS1/TNFAIP6/TREM1
GO:0042060	wound healing	18/114	442/18903	1.57833e-10	4.72974e-08	3.26558e-08	18	CCN1/EDN1/EREG/FGA/FN1/HBB/HBEGF/IL6/ITGA5/ITGB3/NOG/PLAUR/SERPINE1/SLC11A1/TGFB2/THBS1/TIMP1/VTN
GO:0032496	response to lipopolysaccharide	16/114	339/18903	2.11598e-10	5.70681e-08	3.94019e-08	16	ADM/CEBPB/CSF2/CXCL2/CXCL3/CXCL8/EDN1/IL1B/IL6/NLRP3/PDE4B/PPBP/PTGS2/SERPINE1/SLC11A1/ZFP36
GO:0002237	response to molecule of bacterial origin	16/114	360/18903	5.09664e-10	1.2496e-07	8.6277e-08	16	ADM/CEBPB/CSF2/CXCL2/CXCL3/CXCL8/EDN1/IL1B/IL6/NLRP3/PDE4B/PPBP/PTGS2/SERPINE1/SLC11A1/ZFP36
GO:0071222	cellular response to lipopolysaccharide	12/114	222/18903	9.85421e-09	2.21473e-06	1.52913e-06	12	CEBPB/CSF2/CXCL2/CXCL3/CXCL8/IL1B/IL6/NLRP3/PDE4B/PPBP/SERPINE1/ZFP36
GO:0071219	cellular response to molecule of bacterial origin	12/114	234/18903	1.77294e-08	3.67818e-06	2.53955e-06	12	CEBPB/CSF2/CXCL2/CXCL3/CXCL8/IL1B/IL6/NLRP3/PDE4B/PPBP/SERPINE1/ZFP36
GO:0050727	regulation of inflammatory response	15/114	414/18903	2.87366e-08	5.53589e-06	3.82218e-06	15	CEBPB/FABP4/FPR2/IL1B/IL6/MEFV/MMP3/NLRP3/NT5E/OSM/PTGS2/SERPINE1/SOCS3/TNFAIP6/ZFP36
GO:0032102	negative regulation of response to external stimulus	15/114	436/18903	5.67297e-08	9.93924e-06	6.86241e-06	15	DUSP1/EDN1/FGA/FPR2/MEFV/NLRP3/NT5E/PLAUR/SEMA3B/SERPINE1/SOCS3/THBS1/TNFAIP6/VTN/ZFP36
GO:0071216	cellular response to biotic stimulus	12/114	261/18903	5.91634e-08	9.93924e-06	6.86241e-06	12	CEBPB/CSF2/CXCL2/CXCL3/CXCL8/IL1B/IL6/NLRP3/PDE4B/PPBP/SERPINE1/ZFP36
GO:0030198	extracellular matrix organization	13/114	318/18903	6.39515e-08	9.93924e-06	6.86241e-06	13	ADAMTS3/ADAMTSL4/CCN1/HAS1/IBSP/IL6/ITGB3/MMP3/NTN4/PTX3/TGFB2/TGFBI/VTN
GO:0043062	extracellular structure organization	13/114	319/18903	6.63353e-08	9.93924e-06	6.86241e-06	13	ADAMTS3/ADAMTSL4/CCN1/HAS1/IBSP/IL6/ITGB3/MMP3/NTN4/PTX3/TGFB2/TGFBI/VTN
GO:0045229	external encapsulating structure organization	13/114	321/18903	7.13444e-08	1.01272e-05	6.99215e-06	13	ADAMTS3/ADAMTSL4/CCN1/HAS1/IBSP/IL6/ITGB3/MMP3/NTN4/PTX3/TGFB2/TGFBI/VTN
GO:1990868	response to chemokine	8/114	98/18903	1.36839e-07	1.75741e-05	1.21338e-05	8	CCL20/CCL3L1/CXCL2/CXCL3/CXCL8/DUSP1/EDN1/PPBP
GO:1990869	cellular response to chemokine	8/114	98/18903	1.36839e-07	1.75741e-05	1.21338e-05	8	CCL20/CCL3L1/CXCL2/CXCL3/CXCL8/DUSP1/EDN1/PPBP
GO:0045785	positive regulation of cell adhesion	15/114	484/18903	2.19198e-07	2.68717e-05	1.85532e-05	15	CCN1/FGA/FN1/FSTL3/HLA-DRB4/IBSP/IL1B/IL4I1/IL6/ITGA5/ITGB3/NLRP3/PLAUR/TGFB2/VTN
GO:0050731	positive regulation of peptidyl-tyrosine phosphorylation	10/114	193/18903	2.64451e-07	3.10098e-05	2.14103e-05	10	AREG/CSF2/EREG/HBEGF/IL11/IL6/ITGA5/ITGB3/OSM/VTN
GO:0002526	acute inflammatory response	8/114	114/18903	4.41828e-07	4.96504e-05	3.42804e-05	8	CEBPB/FN1/IL1B/IL6/NLRP3/OSM/PTGS2/TREM1
GO:0042730	fibrinolysis	5/114	27/18903	5.30321e-07	5.59541e-05	3.86327e-05	5	FGA/PLAUR/SERPINE1/THBS1/VTN
GO:0030195	negative regulation of blood coagulation	6/114	50/18903	5.39416e-07	5.59541e-05	3.86327e-05	6	EDN1/FGA/PLAUR/SERPINE1/THBS1/VTN
GO:0022602	ovulation cycle process	6/114	51/18903	6.08351e-07	5.80065e-05	4.00498e-05	6	EREG/INHBA/PTPRN/PTX3/TGFB2/TNFAIP6
GO:1900047	negative regulation of hemostasis	6/114	51/18903	6.08351e-07	5.80065e-05	4.00498e-05	6	EDN1/FGA/PLAUR/SERPINE1/THBS1/VTN
GO:0050730	regulation of peptidyl-tyrosine phosphorylation	11/114	266/18903	6.23726e-07	5.80065e-05	4.00498e-05	11	AREG/CSF2/EREG/HBEGF/IL11/IL6/ITGA5/ITGB3/OSM/SOCS3/VTN
GO:0050878	regulation of body fluid levels	13/114	390/18903	6.63076e-07	5.96105e-05	4.11572e-05	13	ADM/APLN/BPIFA1/EDN1/FGA/FN1/HBB/IL6/ITGB3/PLAUR/SERPINE1/THBS1/VTN
GO:0032103	positive regulation of response to external stimulus	14/114	464/18903	7.89572e-07	6.86928e-05	4.74279e-05	14	CEBPB/CXCL8/EDN1/EREG/FABP4/FPR2/IL1B/IL6/NLRP3/OSM/PTGS2/SERPINE1/THBS1/VTN
GO:0050819	negative regulation of coagulation	6/114	54/18903	8.59706e-07	7.24571e-05	5.0027e-05	6	EDN1/FGA/PLAUR/SERPINE1/THBS1/VTN
GO:0001704	formation of primary germ layer	8/114	127/18903	1.0085e-06	7.77888e-05	5.37082e-05	8	DUSP1/FN1/INHBA/ITGA5/ITGB3/NOG/SNAI1/VTN
GO:0002688	regulation of leukocyte chemotaxis	8/114	127/18903	1.0085e-06	7.77888e-05	5.37082e-05	8	CXCL8/DUSP1/EDN1/FPR2/IL6/SERPINE1/THBS1/TNFAIP6
GO:0070371	ERK1 and ERK2 cascade	12/114	340/18903	1.00949e-06	7.77888e-05	5.37082e-05	12	CCL20/CCL3L1/CCN1/DUSP6/EDN1/FGA/FN1/FPR2/IL1B/INHBA/ITGB3/PTPRR
GO:0007596	blood coagulation	10/114	225/18903	1.08067e-06	8.09605e-05	5.5898e-05	10	EDN1/FGA/FN1/HBB/IL6/ITGB3/PLAUR/SERPINE1/THBS1/VTN
GO:0070098	chemokine-mediated signaling pathway	7/114	90/18903	1.19163e-06	8.68604e-05	5.99715e-05	7	CCL20/CCL3L1/CXCL2/CXCL3/CXCL8/EDN1/PPBP
GO:0050817	coagulation	10/114	230/18903	1.31884e-06	9.02252e-05	6.22947e-05	10	EDN1/FGA/FN1/HBB/IL6/ITGB3/PLAUR/SERPINE1/THBS1/VTN
GO:0001706	endoderm formation	6/114	58/18903	1.32117e-06	9.02252e-05	6.22947e-05	6	DUSP1/FN1/INHBA/ITGA5/NOG/VTN
GO:0002685	regulation of leukocyte migration	10/114	231/18903	1.37161e-06	9.02252e-05	6.22947e-05	10	CCL20/CXCL8/DUSP1/EDN1/FPR2/IL6/ITGB3/SERPINE1/THBS1/TNFAIP6
GO:0007599	hemostasis	10/114	231/18903	1.37161e-06	9.02252e-05	6.22947e-05	10	EDN1/FGA/FN1/HBB/IL6/ITGB3/PLAUR/SERPINE1/THBS1/VTN
GO:0043410	positive regulation of MAPK cascade	14/114	496/18903	1.73334e-06	0.000111305	7.68489e-05	14	CCL20/CCL3L1/EDN1/FGA/FPR2/GDF15/IL11/IL1B/IL6/INHBA/ITGB3/OSM/TGFB2/THBS1
GO:0048661	positive regulation of smooth muscle cell proliferation	7/114	98/18903	2.1208e-06	0.000133018	9.18406e-05	7	EDN1/EREG/HBEGF/IL6/ITGB3/PTGS2/THBS1
GO:0033002	muscle cell proliferation	10/114	247/18903	2.50515e-06	0.000153554	0.000106019	10	APLN/EDN1/EREG/HBEGF/IL6/ITGB3/NOG/PTGS2/TGFB2/THBS1
GO:0030949	positive regulation of vascular endothelial growth factor receptor signaling pathway	4/114	17/18903	2.81054e-06	0.000168445	0.000116301	4	IL1B/ITGA5/ITGB3/VTN
GO:0007369	gastrulation	9/114	196/18903	2.92486e-06	0.000171486	0.0001184	9	APLN/DUSP1/FN1/INHBA/ITGA5/ITGB3/NOG/SNAI1/VTN
GO:0002687	positive regulation of leukocyte migration	8/114	148/18903	3.19127e-06	0.000181873	0.000125572	8	CCL20/CXCL8/EDN1/FPR2/IL6/ITGB3/SERPINE1/THBS1
GO:0070372	regulation of ERK1 and ERK2 cascade	11/114	315/18903	3.23689e-06	0.000181873	0.000125572	11	CCL20/CCL3L1/CCN1/DUSP6/FGA/FN1/FPR2/IL1B/INHBA/ITGB3/PTPRR
GO:0001890	placenta development	8/114	150/18903	3.52699e-06	0.000190205	0.000131324	8	ADM/CCN1/CEBPB/CSF2/MME/PTGS2/SNAI1/SOCS3
GO:0038128	ERBB2 signaling pathway	4/114	18/18903	3.59676e-06	0.000190205	0.000131324	4	AREG/EREG/HBEGF/PTPRR
GO:0051917	regulation of fibrinolysis	4/114	18/18903	3.59676e-06	0.000190205	0.000131324	4	PLAUR/SERPINE1/THBS1/VTN
GO:0030193	regulation of blood coagulation	6/114	70/18903	4.03569e-06	0.000209313	0.000144517	6	EDN1/FGA/PLAUR/SERPINE1/THBS1/VTN
GO:0050729	positive regulation of inflammatory response	8/114	154/18903	4.28901e-06	0.000218254	0.00015069	8	CEBPB/FABP4/IL1B/IL6/NLRP3/OSM/PTGS2/SERPINE1
GO:0002548	monocyte chemotaxis	6/114	71/18903	4.38671e-06	0.000219092	0.000151269	6	CCL20/CCL3L1/DUSP1/FPR2/IL6/SERPINE1
GO:0042698	ovulation cycle	6/114	72/18903	4.76215e-06	0.000229348	0.00015835	6	EREG/INHBA/PTPRN/PTX3/TGFB2/TNFAIP6
GO:1900046	regulation of hemostasis	6/114	72/18903	4.76215e-06	0.000229348	0.00015835	6	EDN1/FGA/PLAUR/SERPINE1/THBS1/VTN
GO:0071347	cellular response to interleukin-1	7/114	111/18903	4.88211e-06	0.000231001	0.000159491	7	CCL20/CCL3L1/CEBPB/CXCL8/EDN1/IL1B/IL6
GO:0045429	positive regulation of nitric oxide biosynthetic process	5/114	42/18903	5.19953e-06	0.000241778	0.000166932	5	EDN1/HBB/IL1B/PTGS2/PTX3
GO:0050818	regulation of coagulation	6/114	75/18903	6.04802e-06	0.000276466	0.000190882	6	EDN1/FGA/PLAUR/SERPINE1/THBS1/VTN
GO:0090287	regulation of cellular response to growth factor stimulus	11/114	338/18903	6.33701e-06	0.000284849	0.00019667	11	ADAMTS3/APLN/CCN1/FSTL3/IL1B/ITGA5/ITGB3/NOG/THBS1/TNFAIP6/VTN
GO:1904407	positive regulation of nitric oxide metabolic process	5/114	44/18903	6.57456e-06	0.000290682	0.000200697	5	EDN1/HBB/IL1B/PTGS2/PTX3
GO:0001819	positive regulation of cytokine production	13/114	486/18903	7.45169e-06	0.000324149	0.000223804	13	CEBPB/CSF2/EREG/IL1B/IL6/MEFV/NLRP3/OSM/PDE4B/PTGS2/SERPINE1/SLC11A1/THBS1
GO:0061045	negative regulation of wound healing	6/114	78/18903	7.60243e-06	0.000325456	0.000224707	6	EDN1/FGA/PLAUR/SERPINE1/THBS1/VTN
GO:0030728	ovulation	4/114	22/18903	8.43948e-06	0.000355645	0.00024555	4	EREG/INHBA/PTGS2/TNFAIP6
GO:0097191	extrinsic apoptotic signaling pathway	9/114	224/18903	8.65774e-06	0.000359229	0.000248025	9	BCL2A1/CSF2/FGA/G0S2/IL1B/INHBA/SERPINE1/TGFB2/THBS1
GO:0002673	regulation of acute inflammatory response	5/114	48/18903	1.0169e-05	0.000405863	0.000280222	5	IL1B/IL6/NLRP3/OSM/PTGS2
GO:0006953	acute-phase response	5/114	48/18903	1.0169e-05	0.000405863	0.000280222	5	CEBPB/FN1/IL1B/IL6/PTGS2
GO:0046879	hormone secretion	10/114	291/18903	1.0645e-05	0.000405863	0.000280222	10	ADM/EDN1/FGA/HCAR2/IL11/IL1B/IL6/INHBA/OSM/PTPRN
GO:0019730	antimicrobial humoral response	7/114	125/18903	1.06954e-05	0.000405863	0.000280222	7	BPIFA1/CXCL2/CXCL3/CXCL8/FGA/PPBP/SLC11A1
GO:0050920	regulation of chemotaxis	9/114	230/18903	1.0704e-05	0.000405863	0.000280222	9	CXCL8/DUSP1/EDN1/FPR2/IL6/SEMA3B/SERPINE1/THBS1/TNFAIP6
GO:0007492	endoderm development	6/114	83/18903	1.09021e-05	0.000405863	0.000280222	6	DUSP1/FN1/INHBA/ITGA5/NOG/VTN
GO:0001503	ossification	12/114	429/18903	1.09525e-05	0.000405863	0.000280222	12	AREG/CCN1/CEBPB/FSTL3/IBSP/IL6/NOG/PTGS2/SNAI1/SRGN/TGFB2/TNFAIP6
GO:0048660	regulation of smooth muscle cell proliferation	8/114	175/18903	1.09855e-05	0.000405863	0.000280222	8	APLN/EDN1/EREG/HBEGF/IL6/ITGB3/PTGS2/THBS1
GO:2001234	negative regulation of apoptotic signaling pathway	9/114	233/18903	1.18735e-05	0.000432739	0.000298779	9	CSF2/FGA/IL1B/NOG/PLAUR/PTGS2/SERPINE1/SNAI1/THBS1
GO:0048659	smooth muscle cell proliferation	8/114	179/18903	1.29505e-05	0.000465699	0.000321535	8	APLN/EDN1/EREG/HBEGF/IL6/ITGB3/PTGS2/THBS1
GO:0009914	hormone transport	10/114	300/18903	1.38635e-05	0.000486736	0.00033606	10	ADM/EDN1/FGA/HCAR2/IL11/IL1B/IL6/INHBA/OSM/PTPRN
GO:0007160	cell-matrix adhesion	9/114	238/18903	1.40651e-05	0.000486736	0.00033606	9	FGA/FN1/ITGA5/ITGAX/ITGB3/L1CAM/SERPINE1/THBS1/VTN
GO:0001892	embryonic placenta development	6/114	87/18903	1.43034e-05	0.000486736	0.00033606	6	ADM/CCN1/CEBPB/CSF2/SNAI1/SOCS3
GO:0019755	one-carbon compound transport	4/114	25/18903	1.43923e-05	0.000486736	0.00033606	4	AQP9/HBA1/HBA2/HBB
GO:0031589	cell-substrate adhesion	11/114	369/18903	1.44379e-05	0.000486736	0.00033606	11	CCN1/FGA/FN1/ITGA5/ITGAX/ITGB3/L1CAM/NTN4/SERPINE1/THBS1/VTN
GO:0033627	cell adhesion mediated by integrin	6/114	88/18903	1.52752e-05	0.000508607	0.000351161	6	ITGA5/ITGAX/ITGB3/SERPINE1/TGFB2/VTN
GO:2001233	regulation of apoptotic signaling pathway	11/114	374/18903	1.63595e-05	0.000538069	0.000371502	11	CSF2/FGA/G0S2/IL1B/INHBA/NOG/PLAUR/PTGS2/SERPINE1/SNAI1/THBS1
GO:0031349	positive regulation of defense response	10/114	307/18903	1.69163e-05	0.000549679	0.000379518	10	CEBPB/EREG/FABP4/FPR2/IL1B/IL6/NLRP3/OSM/PTGS2/SERPINE1
GO:0045766	positive regulation of angiogenesis	8/114	187/18903	1.77777e-05	0.000564077	0.000389459	8	ADM/CXCL8/IL1B/ITGA5/ITGAX/ITGB3/SERPINE1/THBS1
GO:1904018	positive regulation of vasculature development	8/114	187/18903	1.77777e-05	0.000564077	0.000389459	8	ADM/CXCL8/IL1B/ITGA5/ITGAX/ITGB3/SERPINE1/THBS1
GO:0018108	peptidyl-tyrosine phosphorylation	11/114	380/18903	1.89556e-05	0.000594456	0.000410434	11	AREG/CSF2/EREG/HBEGF/IL11/IL6/ITGA5/ITGB3/OSM/SOCS3/VTN
GO:0061041	regulation of wound healing	7/114	137/18903	1.94408e-05	0.000596244	0.000411668	7	EDN1/FGA/HBEGF/PLAUR/SERPINE1/THBS1/VTN
GO:0031639	plasminogen activation	4/114	27/18903	1.97822e-05	0.000596244	0.000411668	4	FGA/PLAUR/SERPINE1/THBS1
GO:0018212	peptidyl-tyrosine modification	11/114	382/18903	1.98969e-05	0.000596244	0.000411668	11	AREG/CSF2/EREG/HBEGF/IL11/IL6/ITGA5/ITGB3/OSM/SOCS3/VTN
GO:0042742	defense response to bacterium	11/114	382/18903	1.98969e-05	0.000596244	0.000411668	11	BPIFA1/CCL20/CEBPB/FGA/FPR2/IL1B/IL6/PPBP/SERPINE1/SLC11A1/TREM1
GO:1903035	negative regulation of response to wounding	6/114	94/18903	2.2287e-05	0.000660529	0.000456053	6	EDN1/FGA/PLAUR/SERPINE1/THBS1/VTN
GO:0002675	positive regulation of acute inflammatory response	4/114	28/18903	2.29722e-05	0.000673434	0.000464963	4	IL1B/IL6/OSM/PTGS2
GO:0070555	response to interleukin-1	7/114	141/18903	2.3419e-05	0.00067915	0.00046891	7	CCL20/CCL3L1/CEBPB/CXCL8/EDN1/IL1B/IL6
GO:0034109	homotypic cell-cell adhesion	6/114	95/18903	2.36736e-05	0.000679232	0.000468966	6	FGA/FN1/HBB/IL6/ITGB3/PLAUR
GO:0006959	humoral immune response	10/114	320/18903	2.41398e-05	0.000685316	0.000473167	10	BPIFA1/CXCL2/CXCL3/CXCL8/FGA/IL1B/IL6/PPBP/SLC11A1/TREM1
GO:0001547	antral ovarian follicle growth	3/114	10/18903	2.4857e-05	0.000691128	0.000477179	3	EREG/PTX3/TNFAIP6
GO:0061626	pharyngeal arch artery morphogenesis	3/114	10/18903	2.4857e-05	0.000691128	0.000477179	3	EDN1/NOG/TGFB2
GO:0001541	ovarian follicle development	5/114	58/18903	2.59379e-05	0.00071382	0.000492847	5	CEBPB/EREG/INHBA/PTX3/TNFAIP6
GO:0002690	positive regulation of leukocyte chemotaxis	6/114	97/18903	2.66552e-05	0.000726152	0.000501362	6	CXCL8/EDN1/FPR2/IL6/SERPINE1/THBS1
GO:0023061	signal release	12/114	470/18903	2.70165e-05	0.000728634	0.000503075	12	ADM/EDN1/FGA/HCAR2/IL11/IL1B/IL6/INHBA/OSM/PTGS2/PTPRN/SYN1
GO:0034113	heterotypic cell-cell adhesion	5/114	61/18903	3.31954e-05	0.000886417	0.000612014	5	FGA/IL1B/ITGA5/ITGAX/ITGB3
GO:0050673	epithelial cell proliferation	12/114	481/18903	3.38529e-05	0.000891008	0.000615184	12	APLN/AREG/CEBPB/EREG/IL6/ITGB3/NOG/PROK2/PTPRN/TGFB2/THBS1/ZFP36
GO:0071492	cellular response to UV-A	3/114	11/18903	3.40281e-05	0.000891008	0.000615184	3	MME/MMP3/TIMP1
GO:0071674	mononuclear cell migration	8/114	206/18903	3.55755e-05	0.000914301	0.000631266	8	CCL20/CCL3L1/DUSP1/FPR2/IL6/ITGB3/SERPINE1/THBS1
GO:0045428	regulation of nitric oxide biosynthetic process	5/114	62/18903	3.59347e-05	0.000914301	0.000631266	5	EDN1/HBB/IL1B/PTGS2/PTX3
GO:0046888	negative regulation of hormone secretion	5/114	62/18903	3.59347e-05	0.000914301	0.000631266	5	EDN1/IL11/IL1B/INHBA/OSM
GO:0008585	female gonad development	6/114	105/18903	4.17481e-05	0.00105229	0.000726535	6	CEBPB/EREG/INHBA/PTPRN/PTX3/TNFAIP6
GO:0001667	ameboidal-type cell migration	12/114	492/18903	4.21474e-05	0.00105251	0.000726694	12	EDN1/FN1/HAS1/HBEGF/ITGB3/PTGS2/PTPRR/SEMA3B/SNAI1/TGFB2/THBS1/TIMP1
GO:2001236	regulation of extrinsic apoptotic signaling pathway	7/114	155/18903	4.2987e-05	0.00106363	0.00073437	7	CSF2/FGA/G0S2/IL1B/INHBA/SERPINE1/THBS1
GO:0030947	regulation of vascular endothelial growth factor receptor signaling pathway	4/114	33/18903	4.48559e-05	0.00108772	0.000750997	4	IL1B/ITGA5/ITGB3/VTN
GO:0031100	animal organ regeneration	5/114	65/18903	4.52142e-05	0.00108772	0.000750997	5	ADM/CEBPB/IL6/NNMT/VTN
GO:0080164	regulation of nitric oxide metabolic process	5/114	65/18903	4.52142e-05	0.00108772	0.000750997	5	EDN1/HBB/IL1B/PTGS2/PTX3
GO:0019221	cytokine-mediated signaling pathway	12/114	496/18903	4.55735e-05	0.00108772	0.000750997	12	CCL20/CCL3L1/CSF2/CXCL2/CXCL3/CXCL8/EDN1/EREG/IL1B/IL6/OSM/PPBP
GO:0043434	response to peptide hormone	11/114	421/18903	4.83037e-05	0.00114276	0.000789005	11	ADM/AREG/EDN1/EREG/GDF15/IL1B/INHBA/ITGB3/PTGS2/SOCS3/TIMP1
GO:0019882	antigen processing and presentation	6/114	108/18903	4.89181e-05	0.00114724	0.000792093	6	CTSE/HLA-DRB4/HLA-H/RAB32/SLC11A1/THBS1
GO:0045765	regulation of angiogenesis	10/114	349/18903	5.02894e-05	0.00116529	0.000804558	10	ADM/CXCL8/IL1B/IL6/ITGA5/ITGAX/ITGB3/SERPINE1/TGFB2/THBS1
GO:0007292	female gamete generation	7/114	159/18903	5.05521e-05	0.00116529	0.000804558	7	EDN1/EREG/INHBA/PIWIL2/PTGS2/PTX3/TNFAIP6
GO:0046545	development of primary female sexual characteristics	6/114	109/18903	5.15158e-05	0.00117744	0.000812947	6	CEBPB/EREG/INHBA/PTPRN/PTX3/TNFAIP6
GO:1901342	regulation of vasculature development	10/114	355/18903	5.7996e-05	0.00130314	0.000899732	10	ADM/CXCL8/IL1B/IL6/ITGA5/ITGAX/ITGB3/SERPINE1/TGFB2/THBS1
GO:0045741	positive regulation of epidermal growth factor-activated receptor activity	3/114	13/18903	5.84648e-05	0.00130314	0.000899732	3	AREG/EREG/HBEGF
GO:0051918	negative regulation of fibrinolysis	3/114	13/18903	5.84648e-05	0.00130314	0.000899732	3	SERPINE1/THBS1/VTN
GO:0010810	regulation of cell-substrate adhesion	8/114	222/18903	6.03689e-05	0.00133455	0.00092142	8	CCN1/FGA/FN1/ITGA5/ITGB3/SERPINE1/THBS1/VTN
GO:0070527	platelet aggregation	5/114	71/18903	6.92517e-05	0.00151847	0.00104841	5	FGA/FN1/HBB/IL6/ITGB3
GO:0015670	carbon dioxide transport	3/114	14/18903	7.40828e-05	0.00159841	0.0011036	3	HBA1/HBA2/HBB
GO:0070141	response to UV-A	3/114	14/18903	7.40828e-05	0.00159841	0.0011036	3	MME/MMP3/TIMP1
GO:0045742	positive regulation of epidermal growth factor receptor signaling pathway	4/114	38/18903	7.90574e-05	0.00169221	0.00116836	4	AREG/EREG/HBEGF/PLAUR
GO:1903034	regulation of response to wounding	7/114	172/18903	8.30311e-05	0.00176234	0.00121678	7	EDN1/FGA/HBEGF/PLAUR/SERPINE1/THBS1/VTN
GO:0001818	negative regulation of cytokine production	10/114	371/18903	8.36407e-05	0.00176234	0.00121678	10	FN1/IL6/INHBA/MEFV/NLRP3/SLC11A1/SRGN/TGFB2/THBS1/ZFP36
GO:0046883	regulation of hormone secretion	8/114	234/18903	8.72296e-05	0.00181912	0.00125598	8	EDN1/FGA/HCAR2/IL11/IL1B/IL6/INHBA/OSM
GO:0071634	regulation of transforming growth factor beta production	4/114	39/18903	8.76845e-05	0.00181912	0.00125598	4	FN1/PTGS2/TGFB2/THBS1
GO:0072593	reactive oxygen species metabolic process	8/114	235/18903	8.98558e-05	0.00183874	0.00126953	8	CCN1/EDN1/FPR2/HBA1/HBA2/HBB/MMP3/THBS1
GO:0048511	rhythmic process	9/114	302/18903	8.99942e-05	0.00183874	0.00126953	9	CSF2/EREG/INHBA/PIWIL2/PROK2/PTPRN/PTX3/TGFB2/TNFAIP6
GO:0006809	nitric oxide biosynthetic process	5/114	76/18903	9.59425e-05	0.00193737	0.00133763	5	EDN1/HBB/IL1B/PTGS2/PTX3
GO:0045823	positive regulation of heart contraction	4/114	40/18903	9.69761e-05	0.00193737	0.00133763	4	ADM/APLN/EDN1/TGFB2
GO:1901186	positive regulation of ERBB signaling pathway	4/114	40/18903	9.69761e-05	0.00193737	0.00133763	4	AREG/EREG/HBEGF/PLAUR
GO:0022612	gland morphogenesis	6/114	123/18903	0.000100968	0.00198768	0.00137236	6	AREG/CEBPB/IL6/NOG/NTN4/TGFB2
GO:0071675	regulation of mononuclear cell migration	6/114	123/18903	0.000100968	0.00198768	0.00137236	6	CCL20/DUSP1/FPR2/ITGB3/SERPINE1/THBS1
GO:0052547	regulation of peptidase activity	11/114	459/18903	0.000104392	0.00204018	0.00140862	11	CCN1/FN1/MEFV/NLRP3/PLAUR/PTGS2/SERPINE1/SPINK6/THBS1/TIMP1/VTN
GO:0046660	female sex differentiation	6/114	124/18903	0.000105587	0.00204594	0.00141259	6	CEBPB/EREG/INHBA/PTPRN/PTX3/TNFAIP6
GO:0150077	regulation of neuroinflammatory response	4/114	41/18903	0.000106962	0.00204594	0.00141259	4	IL1B/IL6/MMP3/PTGS2
GO:1903524	positive regulation of blood circulation	4/114	41/18903	0.000106962	0.00204594	0.00141259	4	ADM/APLN/EDN1/TGFB2
GO:0010811	positive regulation of cell-substrate adhesion	6/114	125/18903	0.000110371	0.00209627	0.00144734	6	CCN1/FGA/FN1/ITGA5/ITGB3/VTN
GO:0015671	oxygen transport	3/114	16/18903	0.000112975	0.00213072	0.00147112	3	HBA1/HBA2/HBB
GO:0071604	transforming growth factor beta production	4/114	42/18903	0.000117674	0.00220394	0.00152168	4	FN1/PTGS2/TGFB2/THBS1
GO:0001649	osteoblast differentiation	8/114	246/18903	0.000123337	0.00229406	0.0015839	8	AREG/CCN1/CEBPB/IBSP/IL6/NOG/SNAI1/TNFAIP6
GO:0050728	negative regulation of inflammatory response	7/114	184/18903	0.000126503	0.00233683	0.00161343	7	FPR2/MEFV/NLRP3/NT5E/SOCS3/TNFAIP6/ZFP36
GO:0061844	antimicrobial humoral immune response mediated by antimicrobial peptide	5/114	81/18903	0.000129912	0.00238349	0.00164565	5	BPIFA1/CXCL2/CXCL3/CXCL8/PPBP
GO:0001701	in utero embryonic development	10/114	393/18903	0.00013418	0.00244516	0.00168823	10	ADAMTS3/ADM/CCN1/CEBPB/CSF2/EDN1/NOG/PTPRR/SNAI1/SOCS3
GO:0003198	epithelial to mesenchymal transition involved in endocardial cushion formation	3/114	17/18903	0.000136581	0.00244534	0.00168835	3	NOG/SNAI1/TGFB2
GO:0042542	response to hydrogen peroxide	6/114	130/18903	0.000136942	0.00244534	0.00168835	6	AREG/EDN1/HBA1/HBA2/HBB/IL6
GO:0046209	nitric oxide metabolic process	5/114	82/18903	0.000137688	0.00244534	0.00168835	5	EDN1/HBB/IL1B/PTGS2/PTX3
GO:0016485	protein processing	8/114	250/18903	0.000137817	0.00244534	0.00168835	8	ADAMTS3/CTSE/FGA/MME/PLAUR/SERPINE1/SRGN/THBS1
GO:0048762	mesenchymal cell differentiation	8/114	252/18903	0.000145567	0.00255366	0.00176314	8	EDN1/FN1/IL1B/IL6/NOG/SEMA3B/SNAI1/TGFB2
GO:2001057	reactive nitrogen species metabolic process	5/114	83/18903	0.000145815	0.00255366	0.00176314	5	EDN1/HBB/IL1B/PTGS2/PTX3
GO:0015849	organic acid transport	9/114	324/18903	0.000153068	0.00265678	0.00183433	9	AQP9/EDN1/FABP4/FOLR3/IL1B/SLC11A1/SLC22A4/SLC7A2/THBS1
GO:0034612	response to tumor necrosis factor	8/114	254/18903	0.000153673	0.00265678	0.00183433	8	CCL20/CCL3L1/CXCL8/EDN1/FABP4/PTGS2/THBS1/ZFP36
GO:0010755	regulation of plasminogen activation	3/114	18/18903	0.000163178	0.00278539	0.00192313	3	PLAUR/SERPINE1/THBS1
GO:0032310	prostaglandin secretion	3/114	18/18903	0.000163178	0.00278539	0.00192313	3	EDN1/IL1B/PTGS2
GO:2000273	positive regulation of signaling receptor activity	4/114	46/18903	0.000168406	0.00285655	0.00197226	4	AREG/EDN1/EREG/HBEGF
GO:0140353	lipid export from cell	4/114	47/18903	0.00018322	0.0030884	0.00213234	4	EDN1/IL1B/INHBA/PTGS2
GO:0035743	CD4-positive, alpha-beta T cell cytokine production	3/114	19/18903	0.000192924	0.00323177	0.00223133	3	IL1B/IL6/NLRP3
GO:1903522	regulation of blood circulation	8/114	263/18903	0.000194904	0.00324479	0.00224032	8	ADM/APLN/EDN1/FGA/HBEGF/PDE4B/PTGS2/TGFB2
GO:0008277	regulation of G protein-coupled receptor signaling pathway	6/114	139/18903	0.000197363	0.00326556	0.00225466	6	ADM/APLN/CXCL8/EDN1/ITGB3/PDE4B
GO:0051604	protein maturation	9/114	336/18903	0.000200793	0.00330207	0.00227987	9	ADAMTS3/CTSE/FGA/FN1/MME/PLAUR/SERPINE1/SRGN/THBS1
GO:0002709	regulation of T cell mediated immunity	5/114	89/18903	0.000202565	0.00331102	0.00228604	5	HLA-H/IL1B/IL4I1/IL6/NLRP3
GO:0045667	regulation of osteoblast differentiation	6/114	141/18903	0.000213277	0.00346511	0.00239244	6	AREG/CCN1/CEBPB/IL6/NOG/TNFAIP6
GO:0035987	endodermal cell differentiation	4/114	49/18903	0.000215635	0.00348244	0.0024044	4	FN1/INHBA/ITGA5/VTN
GO:0051384	response to glucocorticoid	6/114	142/18903	0.000221605	0.00355755	0.00245626	6	ADM/AREG/EDN1/IL6/PTGS2/ZFP36
GO:0001780	neutrophil homeostasis	3/114	20/18903	0.000225973	0.00356404	0.00246074	3	HCAR2/IL6/PDE4B
GO:0007171	activation of transmembrane receptor protein tyrosine kinase activity	3/114	20/18903	0.000225973	0.00356404	0.00246074	3	AREG/EREG/HBEGF
GO:0015732	prostaglandin transport	3/114	20/18903	0.000225973	0.00356404	0.00246074	3	EDN1/IL1B/PTGS2
GO:0045860	positive regulation of protein kinase activity	10/114	420/18903	0.000229465	0.00359806	0.00248423	10	AREG/CCN1/EDN1/EREG/HBEGF/IL1B/ITGB3/SLC11A1/TGFB2/THBS1
GO:0003018	vascular process in circulatory system	8/114	270/18903	0.000232918	0.0036311	0.00250704	8	ADM/EDN1/FGA/HBB/PTGS2/SLC2A3/SLC4A4/SLC7A2
GO:0000302	response to reactive oxygen species	7/114	204/18903	0.000238748	0.00368378	0.00254341	7	AREG/EDN1/HBA1/HBA2/HBB/IL6/PTPRN
GO:0050921	positive regulation of chemotaxis	6/114	144/18903	0.000239029	0.00368378	0.00254341	6	CXCL8/EDN1/FPR2/IL6/SERPINE1/THBS1
GO:0051781	positive regulation of cell division	5/114	93/18903	0.000248829	0.00381302	0.00263265	5	EREG/IL1B/OSM/PPBP/TGFB2
GO:0052548	regulation of endopeptidase activity	10/114	428/18903	0.000266765	0.00406477	0.00280646	10	CCN1/MEFV/NLRP3/PLAUR/PTGS2/SERPINE1/SPINK6/THBS1/TIMP1/VTN
GO:0044703	multi-organism reproductive process	7/114	209/18903	0.00027666	0.00417518	0.00288269	7	ADM/EDN1/IL1B/ITGA5/ITGB3/PTGS2/TIMP1
GO:0032147	activation of protein kinase activity	6/114	148/18903	0.000277107	0.00417518	0.00288269	6	AREG/EREG/HBEGF/ITGB3/SLC11A1/TGFB2
GO:0009410	response to xenobiotic stimulus	10/114	432/18903	0.000287244	0.00430387	0.00297154	10	DUSP6/EDN1/IL1B/INHBA/ITGB3/NNMT/PDE4B/PTGS2/TGFB2/THBS1
GO:0071622	regulation of granulocyte chemotaxis	4/114	53/18903	0.000292548	0.00435912	0.00300969	4	CXCL8/EDN1/THBS1/TNFAIP6
GO:0015669	gas transport	3/114	22/18903	0.000302591	0.0044595	0.00307899	3	HBA1/HBA2/HBB
GO:0060713	labyrinthine layer morphogenesis	3/114	22/18903	0.000302591	0.0044595	0.00307899	3	ADM/CCN1/SOCS3
GO:0045744	negative regulation of G protein-coupled receptor signaling pathway	4/114	54/18903	0.000314492	0.00460969	0.0031827	4	ADM/APLN/CXCL8/PDE4B
GO:2001237	negative regulation of extrinsic apoptotic signaling pathway	5/114	99/18903	0.00033277	0.00485124	0.00334947	5	CSF2/FGA/IL1B/SERPINE1/THBS1
GO:0042743	hydrogen peroxide metabolic process	4/114	55/18903	0.000337591	0.00487738	0.00336751	4	HBA1/HBA2/HBB/MMP3
GO:0048732	gland development	10/114	441/18903	0.000338179	0.00487738	0.00336751	10	APLN/AREG/CEBPB/EDN1/IL6/NOG/NTN4/TG/TGFB2/VTN
GO:0044706	multi-multicellular organism process	7/114	218/18903	0.000357033	0.0051219	0.00353634	7	ADM/EDN1/IL1B/ITGA5/ITGB3/PTGS2/TIMP1
GO:0010718	positive regulation of epithelial to mesenchymal transition	4/114	56/18903	0.00036188	0.00516397	0.00356539	4	IL1B/IL6/SNAI1/TGFB2
GO:0090092	regulation of transmembrane receptor protein serine/threonine kinase signaling pathway	8/114	290/18903	0.000376275	0.00534112	0.0036877	8	CCN1/FSTL3/GDF15/INHBA/NOG/TGFB2/THBS1/TNFAIP6
GO:0048568	embryonic organ development	10/114	449/18903	0.000389596	0.00550126	0.00379827	10	ADM/CCN1/CEBPB/CSF2/CXCL8/EDN1/NOG/SNAI1/SOCS3/TGFB2
GO:0048477	oogenesis	5/114	103/18903	0.000399595	0.00561307	0.00387546	5	EDN1/EREG/PIWIL2/PTX3/TNFAIP6
GO:0048010	vascular endothelial growth factor receptor signaling pathway	4/114	58/18903	0.000414169	0.00578763	0.00399599	4	IL1B/ITGA5/ITGB3/VTN
GO:0015711	organic anion transport	9/114	372/18903	0.000423726	0.00589067	0.00406713	9	AQP9/EDN1/FOLR3/IL1B/PTGS2/SLC11A1/SLC2A3/SLC4A4/SLC7A2
GO:0051346	negative regulation of hydrolase activity	9/114	373/18903	0.000432041	0.00597546	0.00412567	9	PLAUR/PTGS2/PTX3/SERPINE1/SPINK6/TGFB2/THBS1/TIMP1/VTN
GO:0051960	regulation of nervous system development	10/114	456/18903	0.00043979	0.00602383	0.00415907	10	AMIGO2/FN1/IL1B/IL6/ITGAX/L1CAM/MME/NOG/SEMA3B/TG
GO:0007566	embryo implantation	4/114	59/18903	0.000442239	0.00602383	0.00415907	4	IL1B/ITGB3/PTGS2/TIMP1
GO:0051785	positive regulation of nuclear division	4/114	59/18903	0.000442239	0.00602383	0.00415907	4	EDN1/EREG/IL1B/PIWIL2
GO:0002711	positive regulation of T cell mediated immunity	4/114	60/18903	0.00047164	0.00639203	0.00441328	4	HLA-H/IL1B/IL6/NLRP3
GO:0010717	regulation of epithelial to mesenchymal transition	5/114	107/18903	0.000476091	0.00642009	0.00443266	5	IL1B/IL6/NOG/SNAI1/TGFB2
GO:0031960	response to corticosteroid	6/114	165/18903	0.000495136	0.00664369	0.00458704	6	ADM/AREG/EDN1/IL6/PTGS2/ZFP36
GO:0002726	positive regulation of T cell cytokine production	3/114	26/18903	0.000501973	0.00666907	0.00460456	3	IL1B/IL6/NLRP3
GO:0060669	embryonic placenta morphogenesis	3/114	26/18903	0.000501973	0.00666907	0.00460456	3	ADM/CCN1/SOCS3
GO:0030509	BMP signaling pathway	6/114	167/18903	0.000527695	0.00696074	0.00480594	6	CCN1/FSTL3/GDF15/NOG/TGFB2/TNFAIP6
GO:0008406	gonad development	7/114	233/18903	0.000531727	0.00696074	0.00480594	7	CEBPB/EREG/INHBA/PTPRN/PTX3/TGFB2/TNFAIP6
GO:0060393	regulation of pathway-restricted SMAD protein phosphorylation	4/114	62/18903	0.000534579	0.00696074	0.00480594	4	GDF15/INHBA/NOG/TGFB2
GO:0090303	positive regulation of wound healing	4/114	62/18903	0.000534579	0.00696074	0.00480594	4	HBEGF/SERPINE1/THBS1/VTN
GO:0048608	reproductive structure development	8/114	306/18903	0.000536831	0.00696074	0.00480594	8	CEBPB/EREG/INHBA/NOG/PTPRN/PTX3/TGFB2/TNFAIP6
GO:1904035	regulation of epithelial cell apoptotic process	5/114	110/18903	0.000540333	0.00697262	0.00481415	5	FGA/IL6/SERPINE1/THBS1/ZFP36
GO:0071356	cellular response to tumor necrosis factor	7/114	234/18903	0.000545434	0.00700493	0.00483645	7	CCL20/CCL3L1/CXCL8/EDN1/FABP4/THBS1/ZFP36
GO:0044403	biological process involved in symbiotic interaction	8/114	307/18903	0.000548466	0.00701049	0.0048403	8	ANPEP/BPIFA1/CXCL8/FN1/ITGA5/ITGB3/PTX3/TREM1
GO:0001837	epithelial to mesenchymal transition	6/114	169/18903	0.000561896	0.00711471	0.00491225	6	EDN1/IL1B/IL6/NOG/SNAI1/TGFB2
GO:0007568	aging	6/114	169/18903	0.000561896	0.00711471	0.00491225	6	ADM/EDN1/INHBA/MME/PTGS2/TIMP1
GO:0010573	vascular endothelial growth factor production	4/114	63/18903	0.000568188	0.00716076	0.00494404	4	ADAMTS3/IL1B/IL6/PTGS2
GO:0061458	reproductive system development	8/114	310/18903	0.000584605	0.0073334	0.00506324	8	CEBPB/EREG/INHBA/NOG/PTPRN/PTX3/TGFB2/TNFAIP6
GO:0045137	development of primary sexual characteristics	7/114	238/18903	0.000603104	0.00746341	0.005153	7	CEBPB/EREG/INHBA/PTPRN/PTX3/TGFB2/TNFAIP6
GO:0019229	regulation of vasoconstriction	4/114	64/18903	0.000603271	0.00746341	0.005153	4	ADM/EDN1/FGA/PTGS2
GO:0048002	antigen processing and presentation of peptide antigen	4/114	64/18903	0.000603271	0.00746341	0.005153	4	CTSE/HLA-DRB4/HLA-H/SLC11A1
GO:0002456	T cell mediated immunity	5/114	113/18903	0.000610883	0.00748887	0.00517058	5	HLA-H/IL1B/IL4I1/IL6/NLRP3
GO:0007229	integrin-mediated signaling pathway	5/114	113/18903	0.000610883	0.00748887	0.00517058	5	FN1/ITGA5/ITGAX/ITGB3/TIMP1
GO:0060485	mesenchyme development	8/114	313/18903	0.000622649	0.0075487	0.00521189	8	EDN1/FN1/IL1B/IL6/NOG/SEMA3B/SNAI1/TGFB2
GO:0003272	endocardial cushion formation	3/114	28/18903	0.000626959	0.0075487	0.00521189	3	NOG/SNAI1/TGFB2
GO:0030194	positive regulation of blood coagulation	3/114	28/18903	0.000626959	0.0075487	0.00521189	3	SERPINE1/THBS1/VTN
GO:1900048	positive regulation of hemostasis	3/114	28/18903	0.000626959	0.0075487	0.00521189	3	SERPINE1/THBS1/VTN
GO:0002824	positive regulation of adaptive immune response based on somatic recombination of immune receptors built from immunoglobulin superfamily domains	5/114	114/18903	0.000635868	0.00758821	0.00523917	5	HLA-H/IL1B/IL6/NLRP3/SLC11A1
GO:0044344	cellular response to fibroblast growth factor stimulus	5/114	114/18903	0.000635868	0.00758821	0.00523917	5	APLN/CXCL8/NOG/THBS1/ZFP36
GO:0010469	regulation of signaling receptor activity	6/114	175/18903	0.000674931	0.00801753	0.00553559	6	AREG/EDN1/EREG/HBEGF/NOG/SERPINE1
GO:0060389	pathway-restricted SMAD protein phosphorylation	4/114	66/18903	0.000678006	0.00801753	0.00553559	4	GDF15/INHBA/NOG/TGFB2
GO:0010634	positive regulation of epithelial cell migration	6/114	176/18903	0.000695367	0.00801753	0.00553559	6	EDN1/HBEGF/ITGB3/PTGS2/TGFB2/THBS1
GO:0003209	cardiac atrium morphogenesis	3/114	29/18903	0.00069624	0.00801753	0.00553559	3	CCN1/NOG/TGFB2
GO:0010575	positive regulation of vascular endothelial growth factor production	3/114	29/18903	0.00069624	0.00801753	0.00553559	3	IL1B/IL6/PTGS2
GO:0060037	pharyngeal system development	3/114	29/18903	0.00069624	0.00801753	0.00553559	3	EDN1/NOG/TGFB2
GO:0090025	regulation of monocyte chemotaxis	3/114	29/18903	0.00069624	0.00801753	0.00553559	3	DUSP1/FPR2/SERPINE1
GO:0097421	liver regeneration	3/114	29/18903	0.00069624	0.00801753	0.00553559	3	CEBPB/IL6/VTN
GO:0045444	fat cell differentiation	7/114	244/18903	0.000698599	0.00801753	0.00553559	7	CCDC71L/CEBPB/FABP4/IL11/IL6/PTGS2/ZFP36
GO:0031638	zymogen activation	4/114	67/18903	0.000717729	0.00820218	0.00566308	4	FGA/PLAUR/SERPINE1/THBS1
GO:0071772	response to BMP	6/114	178/18903	0.000737677	0.0083593	0.00577156	6	CCN1/FSTL3/GDF15/NOG/TGFB2/TNFAIP6
GO:0071773	cellular response to BMP stimulus	6/114	178/18903	0.000737677	0.0083593	0.00577156	6	CCN1/FSTL3/GDF15/NOG/TGFB2/TNFAIP6
GO:0022409	positive regulation of cell-cell adhesion	8/114	322/18903	0.000748954	0.00845158	0.00583528	8	FGA/FSTL3/HLA-DRB4/IL1B/IL4I1/IL6/NLRP3/PLAUR
GO:0038034	signal transduction in absence of ligand	4/114	68/18903	0.000759072	0.00847866	0.00585397	4	BCL2A1/CSF2/IL1B/INHBA
GO:0097192	extrinsic apoptotic signaling pathway in absence of ligand	4/114	68/18903	0.000759072	0.00847866	0.00585397	4	BCL2A1/CSF2/IL1B/INHBA
GO:0048863	stem cell differentiation	7/114	248/18903	0.00076866	0.00847866	0.00585397	7	EDN1/FN1/NOG/OSM/SEMA3B/TGFB2/ZFP36
GO:0007176	regulation of epidermal growth factor-activated receptor activity	3/114	30/18903	0.000770216	0.00847866	0.00585397	3	AREG/EREG/HBEGF
GO:0042744	hydrogen peroxide catabolic process	3/114	30/18903	0.000770216	0.00847866	0.00585397	3	HBA1/HBA2/HBB
GO:0050820	positive regulation of coagulation	3/114	30/18903	0.000770216	0.00847866	0.00585397	3	SERPINE1/THBS1/VTN
GO:0050922	negative regulation of chemotaxis	4/114	69/18903	0.00080207	0.00864808	0.00597095	4	DUSP1/SEMA3B/THBS1/TNFAIP6
GO:0002367	cytokine production involved in immune response	5/114	120/18903	0.000802218	0.00864808	0.00597095	5	IL1B/IL6/NLRP3/TGFB2/TREM1
GO:0002821	positive regulation of adaptive immune response	5/114	120/18903	0.000802218	0.00864808	0.00597095	5	HLA-H/IL1B/IL6/NLRP3/SLC11A1
GO:0071774	response to fibroblast growth factor	5/114	120/18903	0.000802218	0.00864808	0.00597095	5	APLN/CXCL8/NOG/THBS1/ZFP36
GO:0090288	negative regulation of cellular response to growth factor stimulus	5/114	120/18903	0.000802218	0.00864808	0.00597095	5	APLN/FSTL3/NOG/THBS1/TNFAIP6
GO:0110148	biomineralization	6/114	181/18903	0.000804846	0.00864808	0.00597095	6	CCN1/CEBPB/IBSP/NT5E/PTGS2/SRGN
GO:0002822	regulation of adaptive immune response based on somatic recombination of immune receptors built from immunoglobulin superfamily domains	6/114	182/18903	0.000828254	0.00886429	0.00612022	6	HLA-H/IL1B/IL4I1/IL6/NLRP3/SLC11A1
GO:0090100	positive regulation of transmembrane receptor protein serine/threonine kinase signaling pathway	5/114	121/18903	0.000832821	0.00887794	0.00612965	5	CCN1/GDF15/INHBA/TGFB2/THBS1
GO:0033674	positive regulation of kinase activity	10/114	496/18903	0.000841209	0.00892838	0.00616447	10	AREG/CCN1/EDN1/EREG/HBEGF/IL1B/ITGB3/SLC11A1/TGFB2/THBS1
GO:0010951	negative regulation of endopeptidase activity	7/114	252/18903	0.000844174	0.00892838	0.00616447	7	PLAUR/PTGS2/SERPINE1/SPINK6/THBS1/TIMP1/VTN
GO:0045987	positive regulation of smooth muscle contraction	3/114	31/18903	0.000849009	0.00894444	0.00617556	3	EDN1/PROK2/PTGS2
GO:0007159	leukocyte cell-cell adhesion	9/114	414/18903	0.000908925	0.00950144	0.00656013	9	CEBPB/HLA-DRB4/IL1B/IL4I1/IL6/ITGA5/NLRP3/NT5E/OLR1
GO:0050678	regulation of epithelial cell proliferation	9/114	414/18903	0.000908925	0.00950144	0.00656013	9	APLN/AREG/EREG/ITGB3/NOG/PTPRN/TGFB2/THBS1/ZFP36
GO:0001516	prostaglandin biosynthetic process	3/114	32/18903	0.00093274	0.00963832	0.00665464	3	EDN1/IL1B/PTGS2
GO:0033198	response to ATP	3/114	32/18903	0.00093274	0.00963832	0.00665464	3	IL1B/NT5E/PTGS2
GO:0046457	prostanoid biosynthetic process	3/114	32/18903	0.00093274	0.00963832	0.00665464	3	EDN1/IL1B/PTGS2
GO:0045600	positive regulation of fat cell differentiation	4/114	72/18903	0.000941362	0.00969028	0.00669051	4	CCDC71L/CEBPB/PTGS2/ZFP36
GO:0061138	morphogenesis of a branching epithelium	6/114	188/18903	0.000979953	0.0100492	0.00693831	6	ADM/AREG/EDN1/NOG/NTN4/SOCS3
GO:0040013	negative regulation of locomotion	9/114	419/18903	0.000988739	0.0100514	0.00693981	9	DUSP1/HAS1/NOG/PTPRR/SEMA3B/SERPINE1/THBS1/TIMP1/TNFAIP6
GO:0071677	positive regulation of mononuclear cell migration	4/114	73/18903	0.000991346	0.0100514	0.00693981	4	CCL20/FPR2/ITGB3/SERPINE1
GO:0150076	neuroinflammatory response	4/114	73/18903	0.000991346	0.0100514	0.00693981	4	IL1B/IL6/MMP3/PTGS2
GO:0038127	ERBB signaling pathway	5/114	126/18903	0.000999084	0.0100919	0.00696779	5	AREG/EREG/HBEGF/PLAUR/PTPRR
GO:0007565	female pregnancy	6/114	189/18903	0.00100719	0.0101357	0.00699808	6	ADM/IL1B/ITGA5/ITGB3/PTGS2/TIMP1
GO:2000191	regulation of fatty acid transport	3/114	33/18903	0.00102153	0.0102419	0.00707135	3	EDN1/IL1B/THBS1
GO:0001707	mesoderm formation	4/114	74/18903	0.00104317	0.0103098	0.00711828	4	INHBA/ITGB3/NOG/SNAI1
GO:0042058	regulation of epidermal growth factor receptor signaling pathway	4/114	74/18903	0.00104317	0.0103098	0.00711828	4	AREG/EREG/HBEGF/PLAUR
GO:0050766	positive regulation of phagocytosis	4/114	74/18903	0.00104317	0.0103098	0.00711828	4	FPR2/IL1B/PTX3/SLC11A1
GO:0048545	response to steroid hormone	8/114	339/18903	0.0010436	0.0103098	0.00711828	8	ADM/AREG/EDN1/IL6/PTGS2/TGFB2/THBS1/ZFP36
GO:0008217	regulation of blood pressure	6/114	191/18903	0.00106339	0.0104671	0.00722684	6	ADM/ANPEP/APLN/EDN1/HBB/PTGS2
GO:0046683	response to organophosphorus	5/114	128/18903	0.00107206	0.010514	0.00725922	5	AQP9/AREG/IL1B/NT5E/PTGS2
GO:0010466	negative regulation of peptidase activity	7/114	263/18903	0.0010824	0.0105769	0.00730268	7	PLAUR/PTGS2/SERPINE1/SPINK6/THBS1/TIMP1/VTN
GO:0035335	peptidyl-tyrosine dephosphorylation	3/114	34/18903	0.00111549	0.0107446	0.00741843	3	DUSP1/DUSP6/PTPRR
GO:0042044	fluid transport	3/114	34/18903	0.00111549	0.0107446	0.00741843	3	AQP9/CSF2/EDN1
GO:0060317	cardiac epithelial to mesenchymal transition	3/114	34/18903	0.00111549	0.0107446	0.00741843	3	NOG/SNAI1/TGFB2
GO:0090022	regulation of neutrophil chemotaxis	3/114	34/18903	0.00111549	0.0107446	0.00741843	3	CXCL8/EDN1/TNFAIP6
GO:0048332	mesoderm morphogenesis	4/114	76/18903	0.00115247	0.0110613	0.00763709	4	INHBA/ITGB3/NOG/SNAI1
GO:0034329	cell junction assembly	9/114	430/18903	0.00118447	0.0113281	0.00782132	9	AMIGO2/DNER/FN1/IL1B/ITGA5/ITGB3/PCDHB9/SNAI1/THBS1
GO:1903036	positive regulation of response to wounding	4/114	77/18903	0.00121002	0.0115316	0.00796181	4	HBEGF/SERPINE1/THBS1/VTN
GO:0030212	hyaluronan metabolic process	3/114	35/18903	0.00121474	0.0115357	0.00796467	3	HAS1/IL1B/TNFAIP6
GO:0034219	carbohydrate transmembrane transport	5/114	132/18903	0.00122978	0.0116376	0.00803504	5	AQP9/EDN1/IL1B/PPBP/SLC2A3
GO:0006979	response to oxidative stress	9/114	434/18903	0.00126299	0.01191	0.00822312	9	AREG/EDN1/HBA1/HBA2/HBB/IL6/MMP3/PTGS2/PTPRN
GO:0030168	platelet activation	5/114	133/18903	0.00127176	0.011951	0.0082514	5	FGA/FN1/HBB/IL6/ITGB3
GO:0002819	regulation of adaptive immune response	6/114	198/18903	0.00127931	0.0119802	0.00827157	6	HLA-H/IL1B/IL4I1/IL6/NLRP3/SLC11A1
GO:0031348	negative regulation of defense response	7/114	272/18903	0.00131418	0.0122641	0.00846759	7	FPR2/MEFV/NLRP3/NT5E/SOCS3/TNFAIP6/ZFP36
GO:0002504	antigen processing and presentation of peptide or polysaccharide antigen via MHC class II	3/114	36/18903	0.00131938	0.0122702	0.00847179	3	CTSE/HLA-DRB4/THBS1
GO:0042476	odontogenesis	5/114	135/18903	0.00135888	0.0125942	0.00869546	5	ADM/EDN1/INHBA/SERPINE1/TGFB2
GO:0061448	connective tissue development	7/114	274/18903	0.0013706	0.0126593	0.0087404	7	CCN1/EDN1/ITGB3/NOG/SNAI1/TGFBI/TIMP1
GO:0051216	cartilage development	6/114	201/18903	0.00138149	0.0127163	0.00877979	6	CCN1/EDN1/NOG/SNAI1/TGFBI/TIMP1
GO:0045936	negative regulation of phosphate metabolic process	9/114	440/18903	0.0013886	0.0127383	0.00879498	9	DUSP1/DUSP6/FABP4/IL1B/INHBA/NOG/PKIB/SOCS3/TGFB2
GO:1901184	regulation of ERBB signaling pathway	4/114	80/18903	0.00139473	0.0127512	0.00880385	4	AREG/EREG/HBEGF/PLAUR
GO:0010563	negative regulation of phosphorus metabolic process	9/114	441/18903	0.00141049	0.0128516	0.00887322	9	DUSP1/DUSP6/FABP4/IL1B/INHBA/NOG/PKIB/SOCS3/TGFB2
GO:0003230	cardiac atrium development	3/114	37/18903	0.00142952	0.0128944	0.00890275	3	CCN1/NOG/TGFB2
GO:0044319	wound healing, spreading of cells	3/114	37/18903	0.00142952	0.0128944	0.00890275	3	CCN1/HBEGF/ITGA5
GO:0090505	epiboly involved in wound healing	3/114	37/18903	0.00142952	0.0128944	0.00890275	3	CCN1/HBEGF/ITGA5
GO:1904019	epithelial cell apoptotic process	5/114	137/18903	0.00145033	0.0129759	0.00895904	5	FGA/IL6/SERPINE1/THBS1/ZFP36
GO:0001763	morphogenesis of a branching structure	6/114	203/18903	0.001453	0.0129759	0.00895904	6	ADM/AREG/EDN1/NOG/NTN4/SOCS3
GO:0051701	biological process involved in interaction with host	6/114	203/18903	0.001453	0.0129759	0.00895904	6	ANPEP/BPIFA1/CXCL8/ITGA5/ITGB3/PTX3
GO:0042509	regulation of tyrosine phosphorylation of STAT protein	4/114	82/18903	0.00152827	0.0135312	0.00934243	4	CSF2/IL6/OSM/SOCS3
GO:0002369	T cell cytokine production	3/114	38/18903	0.00154528	0.0135312	0.00934243	3	IL1B/IL6/NLRP3
GO:0002724	regulation of T cell cytokine production	3/114	38/18903	0.00154528	0.0135312	0.00934243	3	IL1B/IL6/NLRP3
GO:0003203	endocardial cushion morphogenesis	3/114	38/18903	0.00154528	0.0135312	0.00934243	3	NOG/SNAI1/TGFB2
GO:0040036	regulation of fibroblast growth factor receptor signaling pathway	3/114	38/18903	0.00154528	0.0135312	0.00934243	3	APLN/NOG/THBS1
GO:0090504	epiboly	3/114	38/18903	0.00154528	0.0135312	0.00934243	3	CCN1/HBEGF/ITGA5
GO:2000241	regulation of reproductive process	6/114	206/18903	0.00156551	0.0135879	0.0093816	6	DUSP1/INHBA/ITGB3/PIWIL2/SNAI1/TIMP1
GO:0001821	histamine secretion	2/114	10/18903	0.00157191	0.0135879	0.0093816	2	CSF2/EDN1
GO:0042045	epithelial fluid transport	2/114	10/18903	0.00157191	0.0135879	0.0093816	2	CSF2/EDN1
GO:0062042	regulation of cardiac epithelial to mesenchymal transition	2/114	10/18903	0.00157191	0.0135879	0.0093816	2	NOG/TGFB2
GO:0034341	response to interferon-gamma	5/114	140/18903	0.00159591	0.0137278	0.00947816	5	CCL20/CCL3L1/EDN1/MEFV/SLC11A1
GO:0042310	vasoconstriction	4/114	83/18903	0.00159827	0.0137278	0.00947816	4	ADM/EDN1/FGA/PTGS2
GO:0042401	cellular biogenic amine biosynthetic process	3/114	39/18903	0.00166674	0.0142705	0.00985286	3	NNMT/SAT1/TGFB2
GO:0010631	epithelial cell migration	8/114	366/18903	0.00169589	0.0144528	0.00997874	8	EDN1/HBEGF/ITGB3/PTGS2/PTPRR/SNAI1/TGFB2/THBS1
GO:0014074	response to purine-containing compound	5/114	142/18903	0.00169876	0.0144528	0.00997874	5	AQP9/AREG/IL1B/NT5E/PTGS2
GO:0030336	negative regulation of cell migration	8/114	368/18903	0.00175476	0.0148823	0.0102753	8	DUSP1/HAS1/NOG/PTPRR/SERPINE1/THBS1/TIMP1/TNFAIP6
GO:0090132	epithelium migration	8/114	369/18903	0.00178479	0.0150731	0.010407	8	EDN1/HBEGF/ITGB3/PTGS2/PTPRR/SNAI1/TGFB2/THBS1
GO:0009309	amine biosynthetic process	3/114	40/18903	0.00179402	0.0150731	0.010407	3	NNMT/SAT1/TGFB2
GO:0010762	regulation of fibroblast migration	3/114	40/18903	0.00179402	0.0150731	0.010407	3	HAS1/ITGB3/THBS1
GO:0007548	sex differentiation	7/114	288/18903	0.00182061	0.0152101	0.0105016	7	CEBPB/EREG/INHBA/PTPRN/PTX3/TGFB2/TNFAIP6
GO:0007260	tyrosine phosphorylation of STAT protein	4/114	86/18903	0.00182161	0.0152101	0.0105016	4	CSF2/IL6/OSM/SOCS3
GO:0051783	regulation of nuclear division	5/114	145/18903	0.00186204	0.0154997	0.0107016	5	DUSP1/EDN1/EREG/IL1B/PIWIL2
GO:0046942	carboxylic acid transport	7/114	290/18903	0.00189329	0.0156873	0.0108311	7	AQP9/EDN1/FOLR3/IL1B/PTGS2/SLC11A1/SLC7A2
GO:0008016	regulation of heart contraction	6/114	214/18903	0.00189809	0.0156873	0.0108311	6	ADM/APLN/EDN1/HBEGF/PDE4B/TGFB2
GO:0001660	fever generation	2/114	11/18903	0.00191366	0.0156873	0.0108311	2	IL1B/PTGS2
GO:0002604	regulation of dendritic cell antigen processing and presentation	2/114	11/18903	0.00191366	0.0156873	0.0108311	2	SLC11A1/THBS1
GO:1903826	L-arginine transmembrane transport	2/114	11/18903	0.00191366	0.0156873	0.0108311	2	SLC11A1/SLC7A2
GO:0090130	tissue migration	8/114	374/18903	0.00194111	0.0158641	0.0109532	8	EDN1/HBEGF/ITGB3/PTGS2/PTPRR/SNAI1/TGFB2/THBS1
GO:0010632	regulation of epithelial cell migration	7/114	292/18903	0.00196821	0.0159564	0.0110169	7	EDN1/HBEGF/ITGB3/PTGS2/PTPRR/TGFB2/THBS1
GO:0035296	regulation of tube diameter	5/114	147/18903	0.0019771	0.0159564	0.0110169	5	ADM/EDN1/FGA/HBB/PTGS2
GO:0045598	regulation of fat cell differentiation	5/114	147/18903	0.0019771	0.0159564	0.0110169	5	CCDC71L/CEBPB/IL6/PTGS2/ZFP36
GO:0097746	blood vessel diameter maintenance	5/114	147/18903	0.0019771	0.0159564	0.0110169	5	ADM/EDN1/FGA/HBB/PTGS2
GO:0046889	positive regulation of lipid biosynthetic process	4/114	88/18903	0.00198198	0.0159564	0.0110169	4	ADM/CCN1/IL1B/PTGS2
GO:0035150	regulation of tube size	5/114	148/18903	0.00203654	0.0163469	0.0112865	5	ADM/EDN1/FGA/HBB/PTGS2
GO:0034644	cellular response to UV	4/114	89/18903	0.00206572	0.0164829	0.0113804	4	MME/MMP3/PTGS2/TIMP1
GO:0050829	defense response to Gram-negative bacterium	4/114	89/18903	0.00206572	0.0164829	0.0113804	4	IL6/SERPINE1/SLC11A1/TREM1
GO:0042886	amide transport	7/114	296/18903	0.00212493	0.0169054	0.0116721	7	AQP9/EDN1/FGA/FOLR3/IL1B/IL6/PTPRN
GO:0042326	negative regulation of phosphorylation	8/114	381/18903	0.00217792	0.0172761	0.011928	8	DUSP1/DUSP6/FABP4/IL1B/INHBA/NOG/PKIB/SOCS3
GO:1903531	negative regulation of secretion by cell	5/114	151/18903	0.0022227	0.0175795	0.0121375	5	EDN1/IL11/IL1B/INHBA/OSM
GO:2000146	negative regulation of cell motility	8/114	383/18903	0.0022496	0.0177276	0.0122397	8	DUSP1/HAS1/NOG/PTPRR/SERPINE1/THBS1/TIMP1/TNFAIP6
GO:1903131	mononuclear cell differentiation	9/114	473/18903	0.0022719	0.0177276	0.0122397	9	ADGRG3/CEBPB/CSF2/IL11/IL1B/IL4I1/IL6/INHBA/NLRP3
GO:0001553	luteinization	2/114	12/18903	0.00228736	0.0177276	0.0122397	2	INHBA/PTPRN
GO:0031650	regulation of heat generation	2/114	12/18903	0.00228736	0.0177276	0.0122397	2	IL1B/PTGS2
GO:0071372	cellular response to follicle-stimulating hormone stimulus	2/114	12/18903	0.00228736	0.0177276	0.0122397	2	EDN1/INHBA
GO:0030183	B cell differentiation	5/114	152/18903	0.00228743	0.0177276	0.0122397	5	ADGRG3/IL11/IL4I1/IL6/INHBA
GO:0062013	positive regulation of small molecule metabolic process	5/114	152/18903	0.00228743	0.0177276	0.0122397	5	ADM/IL1B/NNMT/PTGS2/SLC4A4
GO:0070374	positive regulation of ERK1 and ERK2 cascade	6/114	223/18903	0.00233346	0.0180325	0.0124503	6	CCL20/CCL3L1/FGA/FPR2/INHBA/ITGB3
GO:0045840	positive regulation of mitotic nuclear division	3/114	44/18903	0.00236318	0.01821	0.0125729	3	EDN1/EREG/IL1B
GO:0050886	endocrine process	4/114	93/18903	0.00242516	0.0186344	0.0128658	4	EDN1/HCAR2/IL1B/INHBA
GO:0007178	transmembrane receptor protein serine/threonine kinase signaling pathway	8/114	390/18903	0.00251522	0.0192715	0.0133057	8	CCN1/FSTL3/GDF15/INHBA/NOG/TGFB2/THBS1/TNFAIP6
GO:0008643	carbohydrate transport	5/114	156/18903	0.00256012	0.0195599	0.0135049	5	AQP9/EDN1/IL1B/PPBP/SLC2A3
GO:0010720	positive regulation of cell development	7/114	307/18903	0.00260604	0.0197936	0.0136662	7	FGA/FN1/IL1B/IL6/ITGB3/L1CAM/MME
GO:0010876	lipid localization	9/114	483/18903	0.00261361	0.0197936	0.0136662	9	AQP9/EDN1/FABP4/IL1B/IL6/INHBA/ITGB3/PTGS2/THBS1
GO:0007044	cell-substrate junction assembly	4/114	95/18903	0.00262007	0.0197936	0.0136662	4	FN1/ITGA5/ITGB3/THBS1
GO:0045638	negative regulation of myeloid cell differentiation	4/114	95/18903	0.00262007	0.0197936	0.0136662	4	FSTL3/INHBA/TNFAIP6/ZFP36
GO:2001239	regulation of extrinsic apoptotic signaling pathway in absence of ligand	3/114	46/18903	0.00268508	0.0199505	0.0137745	3	CSF2/IL1B/INHBA
GO:0031392	regulation of prostaglandin biosynthetic process	2/114	13/18903	0.00269261	0.0199505	0.0137745	2	IL1B/PTGS2
GO:0033690	positive regulation of osteoblast proliferation	2/114	13/18903	0.00269261	0.0199505	0.0137745	2	CCN1/ITGB3
GO:0035745	T-helper 2 cell cytokine production	2/114	13/18903	0.00269261	0.0199505	0.0137745	2	IL6/NLRP3
GO:0051608	histamine transport	2/114	13/18903	0.00269261	0.0199505	0.0137745	2	CSF2/EDN1
GO:0060670	branching involved in labyrinthine layer morphogenesis	2/114	13/18903	0.00269261	0.0199505	0.0137745	2	ADM/SOCS3
GO:2000551	regulation of T-helper 2 cell cytokine production	2/114	13/18903	0.00269261	0.0199505	0.0137745	2	IL6/NLRP3
GO:0044409	entry into host	5/114	158/18903	0.00270498	0.0199872	0.0137999	5	ANPEP/CXCL8/ITGA5/ITGB3/PTX3
GO:0061097	regulation of protein tyrosine kinase activity	4/114	96/18903	0.00272144	0.0200539	0.0138459	4	AREG/EREG/HBEGF/ITGB3
GO:0042063	gliogenesis	7/114	310/18903	0.00275077	0.0202148	0.013957	7	AREG/DNER/IL1B/IL6/NOG/TGFB2/VTN
GO:0006576	cellular biogenic amine metabolic process	4/114	97/18903	0.00282547	0.0207073	0.0142971	4	IL4I1/NNMT/SAT1/TGFB2
GO:0060711	labyrinthine layer development	3/114	47/18903	0.00285566	0.0208155	0.0143717	3	ADM/CCN1/SOCS3
GO:1902622	regulation of neutrophil migration	3/114	47/18903	0.00285566	0.0208155	0.0143717	3	CXCL8/EDN1/TNFAIP6
GO:0022407	regulation of cell-cell adhesion	9/114	490/18903	0.00287623	0.0209089	0.0144362	9	CEBPB/FGA/FSTL3/HLA-DRB4/IL1B/IL4I1/IL6/NLRP3/PLAUR
GO:2000116	regulation of cysteine-type endopeptidase activity	6/114	235/18903	0.00302623	0.02187	0.0150999	6	CCN1/MEFV/NLRP3/PLAUR/PTGS2/THBS1
GO:0003197	endocardial cushion development	3/114	48/18903	0.00303278	0.02187	0.0150999	3	NOG/SNAI1/TGFB2
GO:0032309	icosanoid secretion	3/114	48/18903	0.00303278	0.02187	0.0150999	3	EDN1/IL1B/PTGS2
GO:0032602	chemokine production	4/114	99/18903	0.00304165	0.0218755	0.0151036	4	IL1B/IL6/MEFV/TREM1
GO:0006596	polyamine biosynthetic process	2/114	14/18903	0.00312903	0.0222665	0.0153736	2	NNMT/SAT1
GO:0030213	hyaluronan biosynthetic process	2/114	14/18903	0.00312903	0.0222665	0.0153736	2	HAS1/IL1B
GO:0032306	regulation of prostaglandin secretion	2/114	14/18903	0.00312903	0.0222665	0.0153736	2	EDN1/IL1B
GO:0032308	positive regulation of prostaglandin secretion	2/114	14/18903	0.00312903	0.0222665	0.0153736	2	EDN1/IL1B
GO:0098869	cellular oxidant detoxification	4/114	100/18903	0.00315386	0.0223348	0.0154208	4	HBA1/HBA2/HBB/PTGS2
GO:0002274	myeloid leukocyte activation	6/114	237/18903	0.0031552	0.0223348	0.0154208	6	CSF2/CXCL8/FN1/IL6/SLC11A1/THBS1
GO:0010862	positive regulation of pathway-restricted SMAD protein phosphorylation	3/114	49/18903	0.0032165	0.0225909	0.0155976	3	GDF15/INHBA/TGFB2
GO:0033628	regulation of cell adhesion mediated by integrin	3/114	49/18903	0.0032165	0.0225909	0.0155976	3	ITGB3/SERPINE1/TGFB2
GO:0045933	positive regulation of muscle contraction	3/114	49/18903	0.0032165	0.0225909	0.0155976	3	EDN1/PROK2/PTGS2
GO:0015908	fatty acid transport	4/114	101/18903	0.00326886	0.0228397	0.0157693	4	EDN1/FABP4/IL1B/THBS1
GO:0150115	cell-substrate junction organization	4/114	101/18903	0.00326886	0.0228397	0.0157693	4	FN1/ITGA5/ITGB3/THBS1
GO:0060419	heart growth	4/114	102/18903	0.00338669	0.02344	0.0161838	4	DUSP6/EDN1/NOG/TGFB2
GO:0006692	prostanoid metabolic process	3/114	50/18903	0.00340692	0.02344	0.0161838	3	EDN1/IL1B/PTGS2
GO:0006693	prostaglandin metabolic process	3/114	50/18903	0.00340692	0.02344	0.0161838	3	EDN1/IL1B/PTGS2
GO:0032964	collagen biosynthetic process	3/114	50/18903	0.00340692	0.02344	0.0161838	3	ADAMTS3/IL6/INHBA
GO:1902041	regulation of extrinsic apoptotic signaling pathway via death domain receptors	3/114	50/18903	0.00340692	0.02344	0.0161838	3	FGA/SERPINE1/THBS1
GO:2001238	positive regulation of extrinsic apoptotic signaling pathway	3/114	50/18903	0.00340692	0.02344	0.0161838	3	G0S2/INHBA/THBS1
GO:0030307	positive regulation of cell growth	5/114	167/18903	0.00343125	0.0235473	0.0162579	5	EDN1/FN1/HBEGF/L1CAM/TGFB2
GO:0019233	sensory perception of pain	4/114	103/18903	0.00350738	0.0239479	0.0165345	4	EDN1/MME/PROK2/PTGS2
GO:0050764	regulation of phagocytosis	4/114	103/18903	0.00350738	0.0239479	0.0165345	4	FPR2/IL1B/PTX3/SLC11A1
GO:0002031	G protein-coupled receptor internalization	2/114	15/18903	0.00359624	0.0240398	0.0165979	2	ADM/APLN
GO:0002468	dendritic cell antigen processing and presentation	2/114	15/18903	0.00359624	0.0240398	0.0165979	2	SLC11A1/THBS1
GO:0034116	positive regulation of heterotypic cell-cell adhesion	2/114	15/18903	0.00359624	0.0240398	0.0165979	2	FGA/IL1B
GO:0060413	atrial septum morphogenesis	2/114	15/18903	0.00359624	0.0240398	0.0165979	2	CCN1/TGFB2
GO:0097396	response to interleukin-17	2/114	15/18903	0.00359624	0.0240398	0.0165979	2	IL1B/SOCS3
GO:0097398	cellular response to interleukin-17	2/114	15/18903	0.00359624	0.0240398	0.0165979	2	IL1B/SOCS3
GO:2001279	regulation of unsaturated fatty acid biosynthetic process	2/114	15/18903	0.00359624	0.0240398	0.0165979	2	IL1B/PTGS2
GO:0050873	brown fat cell differentiation	3/114	51/18903	0.0036041	0.0240398	0.0165979	3	CEBPB/FABP4/PTGS2
GO:1903793	positive regulation of anion transport	3/114	51/18903	0.0036041	0.0240398	0.0165979	3	CEBPB/EDN1/IL1B
GO:0002262	myeloid cell homeostasis	5/114	169/18903	0.00360998	0.0240398	0.0165979	5	HCAR2/IL6/INHBA/PDE4B/ZFP36
GO:0034250	positive regulation of cellular amide metabolic process	5/114	170/18903	0.00370181	0.0245906	0.0169782	5	CCN1/IGF2BP1/IL6/PIWIL2/THBS1
GO:0002762	negative regulation of myeloid leukocyte differentiation	3/114	52/18903	0.00380813	0.0251728	0.0173802	3	FSTL3/INHBA/TNFAIP6
GO:0006636	unsaturated fatty acid biosynthetic process	3/114	52/18903	0.00380813	0.0251728	0.0173802	3	EDN1/IL1B/PTGS2
GO:0007188	adenylate cyclase-modulating G protein-coupled receptor signaling pathway	6/114	248/18903	0.00393929	0.0259762	0.0179349	6	ADGRG3/ADM/EDN1/FPR2/ITGB3/PDE4B
GO:0009895	negative regulation of catabolic process	7/114	332/18903	0.00400963	0.0261844	0.0180786	7	HCAR2/IGF2BP1/IL1B/MAGEA6/SLC11A1/TIMP1/ZFP36
GO:0048638	regulation of developmental growth	7/114	332/18903	0.00400963	0.0261844	0.0180786	7	DUSP6/EDN1/FN1/GDF15/L1CAM/NOG/SEMA3B
GO:0048146	positive regulation of fibroblast proliferation	3/114	53/18903	0.00401906	0.0261844	0.0180786	3	EREG/FN1/ITGB3
GO:0048260	positive regulation of receptor-mediated endocytosis	3/114	53/18903	0.00401906	0.0261844	0.0180786	3	APLN/SERPINE1/VTN
GO:0032963	collagen metabolic process	4/114	107/18903	0.00401941	0.0261844	0.0180786	4	ADAMTS3/IL6/INHBA/MMP3
GO:0031214	biomineral tissue development	5/114	174/18903	0.00408595	0.026492	0.018291	5	CCN1/CEBPB/IBSP/PTGS2/SRGN
GO:0034112	positive regulation of homotypic cell-cell adhesion	2/114	16/18903	0.00409384	0.026492	0.018291	2	IL6/PLAUR
GO:0060047	heart contraction	6/114	250/18903	0.0040961	0.026492	0.018291	6	ADM/APLN/EDN1/HBEGF/PDE4B/TGFB2
GO:0033138	positive regulation of peptidyl-serine phosphorylation	4/114	108/18903	0.00415489	0.026744	0.018465	4	IL11/IL6/OSM/PTGS2
GO:0044106	cellular amine metabolic process	4/114	108/18903	0.00415489	0.026744	0.018465	4	IL4I1/NNMT/SAT1/TGFB2
GO:0051048	negative regulation of secretion	5/114	175/18903	0.00418627	0.0268818	0.0185602	5	EDN1/IL11/IL1B/INHBA/OSM
GO:0071214	cellular response to abiotic stimulus	7/114	335/18903	0.00421046	0.026909	0.0185789	7	IL1B/ITGB3/MME/MMP3/NLRP3/PTGS2/TIMP1
GO:0104004	cellular response to environmental stimulus	7/114	335/18903	0.00421046	0.026909	0.0185789	7	IL1B/ITGB3/MME/MMP3/NLRP3/PTGS2/TIMP1
GO:0014009	glial cell proliferation	3/114	54/18903	0.00423698	0.0270145	0.0186518	3	AREG/IL1B/IL6
GO:0042116	macrophage activation	4/114	109/18903	0.00429343	0.0273098	0.0188557	4	CSF2/IL6/SLC11A1/THBS1
GO:0001933	negative regulation of protein phosphorylation	7/114	338/18903	0.00441883	0.0279208	0.0192775	7	DUSP1/DUSP6/FABP4/IL1B/NOG/PKIB/SOCS3
GO:0007173	epidermal growth factor receptor signaling pathway	4/114	110/18903	0.00443505	0.0279208	0.0192775	4	AREG/EREG/HBEGF/PLAUR
GO:0003179	heart valve morphogenesis	3/114	55/18903	0.00446194	0.0279208	0.0192775	3	CCN1/SNAI1/TGFB2
GO:0010761	fibroblast migration	3/114	55/18903	0.00446194	0.0279208	0.0192775	3	HAS1/ITGB3/THBS1
GO:0043616	keratinocyte proliferation	3/114	55/18903	0.00446194	0.0279208	0.0192775	3	AREG/EREG/ZFP36
GO:0045668	negative regulation of osteoblast differentiation	3/114	55/18903	0.00446194	0.0279208	0.0192775	3	AREG/NOG/TNFAIP6
GO:0072132	mesenchyme morphogenesis	3/114	55/18903	0.00446194	0.0279208	0.0192775	3	NOG/SNAI1/TGFB2
GO:0001659	temperature homeostasis	5/114	178/18903	0.0044978	0.02808	0.0193875	5	CEBPB/FABP4/G0S2/IL1B/PTGS2
GO:0030510	regulation of BMP signaling pathway	4/114	111/18903	0.0045798	0.0281357	0.0194259	4	CCN1/FSTL3/NOG/TNFAIP6
GO:0034446	substrate adhesion-dependent cell spreading	4/114	111/18903	0.0045798	0.0281357	0.0194259	4	FGA/FN1/ITGB3/NTN4
GO:1901222	regulation of NIK/NF-kappaB signaling	4/114	111/18903	0.0045798	0.0281357	0.0194259	4	ADGRG3/EDN1/IL1B/NLRP3
GO:0002706	regulation of lymphocyte mediated immunity	5/114	179/18903	0.00460522	0.0281357	0.0194259	5	HLA-H/IL1B/IL4I1/IL6/NLRP3
GO:0010763	positive regulation of fibroblast migration	2/114	17/18903	0.00462148	0.0281357	0.0194259	2	ITGB3/THBS1
GO:0031649	heat generation	2/114	17/18903	0.00462148	0.0281357	0.0194259	2	IL1B/PTGS2
GO:0072378	blood coagulation, fibrin clot formation	2/114	17/18903	0.00462148	0.0281357	0.0194259	2	FGA/FN1
GO:0090399	replicative senescence	2/114	17/18903	0.00462148	0.0281357	0.0194259	2	MME/SERPINE1
GO:1901163	regulation of trophoblast cell migration	2/114	17/18903	0.00462148	0.0281357	0.0194259	2	ITGB3/TIMP1
GO:1902036	regulation of hematopoietic stem cell differentiation	2/114	17/18903	0.00462148	0.0281357	0.0194259	2	OSM/ZFP36
GO:1990822	basic amino acid transmembrane transport	2/114	17/18903	0.00462148	0.0281357	0.0194259	2	SLC11A1/SLC7A2
GO:0006898	receptor-mediated endocytosis	6/114	257/18903	0.0046815	0.0283851	0.0195981	6	ADM/APLN/CXCL8/ITGB3/SERPINE1/VTN
GO:0060986	endocrine hormone secretion	3/114	56/18903	0.00469402	0.0283851	0.0195981	3	HCAR2/IL1B/INHBA
GO:0071715	icosanoid transport	3/114	56/18903	0.00469402	0.0283851	0.0195981	3	EDN1/IL1B/PTGS2
GO:0048259	regulation of receptor-mediated endocytosis	4/114	112/18903	0.00472769	0.0284747	0.01966	4	APLN/ITGB3/SERPINE1/VTN
GO:0006869	lipid transport	8/114	433/18903	0.00472995	0.0284747	0.01966	8	AQP9/EDN1/FABP4/IL1B/INHBA/ITGB3/PTGS2/THBS1
GO:1904659	glucose transmembrane transport	4/114	113/18903	0.00487877	0.0293052	0.0202334	4	EDN1/IL1B/PPBP/SLC2A3
GO:0038066	p38MAPK cascade	3/114	57/18903	0.00493328	0.0295321	0.02039	3	DUSP1/IL1B/ZFP36
GO:0046890	regulation of lipid biosynthetic process	5/114	182/18903	0.00493845	0.0295321	0.02039	5	ADM/CCN1/IL1B/PTGS2/SNAI1
GO:0003015	heart process	6/114	261/18903	0.00504253	0.0300851	0.0207718	6	ADM/APLN/EDN1/HBEGF/PDE4B/TGFB2
GO:0044000	movement in host	5/114	183/18903	0.00505323	0.0300851	0.0207718	5	ANPEP/CXCL8/ITGA5/ITGB3/PTX3
GO:0002827	positive regulation of T-helper 1 type immune response	2/114	18/18903	0.00517877	0.0301703	0.0208306	2	IL1B/SLC11A1
GO:0002830	positive regulation of type 2 immune response	2/114	18/18903	0.00517877	0.0301703	0.0208306	2	IL6/NLRP3
GO:0006595	polyamine metabolic process	2/114	18/18903	0.00517877	0.0301703	0.0208306	2	NNMT/SAT1
GO:0015802	basic amino acid transport	2/114	18/18903	0.00517877	0.0301703	0.0208306	2	SLC11A1/SLC7A2
GO:0032354	response to follicle-stimulating hormone	2/114	18/18903	0.00517877	0.0301703	0.0208306	2	EDN1/INHBA
GO:0061450	trophoblast cell migration	2/114	18/18903	0.00517877	0.0301703	0.0208306	2	ITGB3/TIMP1
GO:0086103	G protein-coupled receptor signaling pathway involved in heart process	2/114	18/18903	0.00517877	0.0301703	0.0208306	2	EDN1/PDE4B
GO:0150078	positive regulation of neuroinflammatory response	2/114	18/18903	0.00517877	0.0301703	0.0208306	2	IL1B/IL6
GO:0042303	molting cycle	4/114	115/18903	0.00519059	0.0301703	0.0208306	4	INHBA/PTGS2/SNAI1/TGFB2
GO:0042633	hair cycle	4/114	115/18903	0.00519059	0.0301703	0.0208306	4	INHBA/PTGS2/SNAI1/TGFB2
GO:1990748	cellular detoxification	4/114	115/18903	0.00519059	0.0301703	0.0208306	4	HBA1/HBA2/HBB/PTGS2
GO:1905952	regulation of lipid localization	5/114	185/18903	0.00528846	0.030673	0.0211778	5	EDN1/IL1B/IL6/ITGB3/THBS1
GO:0008645	hexose transmembrane transport	4/114	116/18903	0.00535139	0.0309714	0.0213838	4	EDN1/IL1B/PPBP/SLC2A3
GO:0001755	neural crest cell migration	3/114	59/18903	0.00543357	0.0311794	0.0215274	3	EDN1/FN1/SEMA3B
GO:0010574	regulation of vascular endothelial growth factor production	3/114	59/18903	0.00543357	0.0311794	0.0215274	3	IL1B/IL6/PTGS2
GO:0043903	regulation of biological process involved in symbiotic interaction	3/114	59/18903	0.00543357	0.0311794	0.0215274	3	BPIFA1/CXCL8/PTX3
GO:0061098	positive regulation of protein tyrosine kinase activity	3/114	59/18903	0.00543357	0.0311794	0.0215274	3	AREG/EREG/HBEGF
GO:0045861	negative regulation of proteolysis	7/114	352/18903	0.00549624	0.0314721	0.0217294	7	PLAUR/PTGS2/SERPINE1/SPINK6/THBS1/TIMP1/VTN
GO:0009308	amine metabolic process	4/114	117/18903	0.00551549	0.0315154	0.0217594	4	IL4I1/NNMT/SAT1/TGFB2
GO:0002718	regulation of cytokine production involved in immune response	4/114	118/18903	0.00568293	0.0322661	0.0222777	4	IL1B/IL6/NLRP3/TGFB2
GO:0007088	regulation of mitotic nuclear division	4/114	118/18903	0.00568293	0.0322661	0.0222777	4	DUSP1/EDN1/EREG/IL1B
GO:0002011	morphogenesis of an epithelial sheet	3/114	60/18903	0.00569473	0.0322661	0.0222777	3	CCN1/HBEGF/ITGA5
GO:2000351	regulation of endothelial cell apoptotic process	3/114	60/18903	0.00569473	0.0322661	0.0222777	3	FGA/SERPINE1/THBS1
GO:0032695	negative regulation of interleukin-12 production	2/114	19/18903	0.00576534	0.0325977	0.0225066	2	MEFV/THBS1
GO:0002708	positive regulation of lymphocyte mediated immunity	4/114	119/18903	0.00585373	0.0327037	0.0225798	4	HLA-H/IL1B/IL6/NLRP3
GO:0015718	monocarboxylic acid transport	4/114	119/18903	0.00585373	0.0327037	0.0225798	4	AQP9/EDN1/IL1B/PTGS2
GO:0015749	monosaccharide transmembrane transport	4/114	119/18903	0.00585373	0.0327037	0.0225798	4	EDN1/IL1B/PPBP/SLC2A3
GO:0032609	interferon-gamma production	4/114	119/18903	0.00585373	0.0327037	0.0225798	4	IL1B/INHBA/PDE4B/SLC11A1
GO:0032649	regulation of interferon-gamma production	4/114	119/18903	0.00585373	0.0327037	0.0225798	4	IL1B/INHBA/PDE4B/SLC11A1
GO:0002683	negative regulation of immune system process	8/114	449/18903	0.00585684	0.0327037	0.0225798	8	CEBPB/DUSP1/FSTL3/IL4I1/INHBA/TGFB2/THBS1/TNFAIP6
GO:0051302	regulation of cell division	5/114	190/18903	0.00591031	0.0329341	0.0227389	5	EREG/IL1B/OSM/PPBP/TGFB2
GO:0046456	icosanoid biosynthetic process	3/114	61/18903	0.00596329	0.0330246	0.0228014	3	EDN1/IL1B/PTGS2
GO:0048255	mRNA stabilization	3/114	61/18903	0.00596329	0.0330246	0.0228014	3	IGF2BP1/SLC11A1/ZFP36
GO:0090497	mesenchymal cell migration	3/114	61/18903	0.00596329	0.0330246	0.0228014	3	EDN1/FN1/SEMA3B
GO:0051897	positive regulation of protein kinase B signaling	4/114	120/18903	0.00602792	0.0333141	0.0230013	4	GDF15/HBEGF/OSM/THBS1
GO:0031099	regeneration	5/114	192/18903	0.00617291	0.0340457	0.0235064	5	ADM/CEBPB/IL6/NNMT/VTN
GO:0031623	receptor internalization	4/114	121/18903	0.00620553	0.0341557	0.0235823	4	ADM/APLN/CXCL8/ITGB3
GO:0002577	regulation of antigen processing and presentation	2/114	20/18903	0.00638082	0.0347271	0.0239768	2	SLC11A1/THBS1
GO:0042474	middle ear morphogenesis	2/114	20/18903	0.00638082	0.0347271	0.0239768	2	EDN1/NOG
GO:0071371	cellular response to gonadotropin stimulus	2/114	20/18903	0.00638082	0.0347271	0.0239768	2	EDN1/INHBA
GO:0072376	protein activation cascade	2/114	20/18903	0.00638082	0.0347271	0.0239768	2	FGA/FN1
GO:0002761	regulation of myeloid leukocyte differentiation	4/114	122/18903	0.00638659	0.0347271	0.0239768	4	CEBPB/FSTL3/INHBA/TNFAIP6
GO:0048675	axon extension	4/114	122/18903	0.00638659	0.0347271	0.0239768	4	EDN1/FN1/L1CAM/SEMA3B
GO:0030514	negative regulation of BMP signaling pathway	3/114	63/18903	0.00652289	0.0350937	0.02423	3	FSTL3/NOG/TNFAIP6
GO:0032623	interleukin-2 production	3/114	63/18903	0.00652289	0.0350937	0.02423	3	IL1B/PDE4B/ZFP36
GO:0032663	regulation of interleukin-2 production	3/114	63/18903	0.00652289	0.0350937	0.02423	3	IL1B/PDE4B/ZFP36
GO:0032731	positive regulation of interleukin-1 beta production	3/114	63/18903	0.00652289	0.0350937	0.02423	3	IL6/MEFV/NLRP3
GO:0032757	positive regulation of interleukin-8 production	3/114	63/18903	0.00652289	0.0350937	0.02423	3	IL1B/IL6/SERPINE1
GO:0030282	bone mineralization	4/114	123/18903	0.00657113	0.0350937	0.02423	4	CCN1/IBSP/PTGS2/SRGN
GO:0046887	positive regulation of hormone secretion	4/114	123/18903	0.00657113	0.0350937	0.02423	4	EDN1/FGA/HCAR2/INHBA
GO:0071482	cellular response to light stimulus	4/114	123/18903	0.00657113	0.0350937	0.02423	4	MME/MMP3/PTGS2/TIMP1
GO:0097237	cellular response to toxic substance	4/114	123/18903	0.00657113	0.0350937	0.02423	4	HBA1/HBA2/HBB/PTGS2
GO:1903532	positive regulation of secretion by cell	6/114	278/18903	0.00680865	0.0362904	0.0250562	6	EDN1/FGA/HCAR2/IL1B/INHBA/TGFB2
GO:0051962	positive regulation of nervous system development	6/114	279/18903	0.00692489	0.0368371	0.0254337	6	AMIGO2/FN1/IL1B/IL6/L1CAM/MME
GO:0002029	desensitization of G protein-coupled receptor signaling pathway	2/114	21/18903	0.00702486	0.03686	0.0254495	2	ADM/APLN
GO:0022401	negative adaptation of signaling pathway	2/114	21/18903	0.00702486	0.03686	0.0254495	2	ADM/APLN
GO:0032305	positive regulation of icosanoid secretion	2/114	21/18903	0.00702486	0.03686	0.0254495	2	EDN1/IL1B
GO:0060252	positive regulation of glial cell proliferation	2/114	21/18903	0.00702486	0.03686	0.0254495	2	IL1B/IL6
GO:0060353	regulation of cell adhesion molecule production	2/114	21/18903	0.00702486	0.03686	0.0254495	2	CXCL8/IL1B
GO:0071636	positive regulation of transforming growth factor beta production	2/114	21/18903	0.00702486	0.03686	0.0254495	2	PTGS2/THBS1
GO:0090026	positive regulation of monocyte chemotaxis	2/114	21/18903	0.00702486	0.03686	0.0254495	2	FPR2/SERPINE1
GO:0003170	heart valve development	3/114	65/18903	0.00711276	0.0370331	0.025569	3	CCN1/SNAI1/TGFB2
GO:0006940	regulation of smooth muscle contraction	3/114	65/18903	0.00711276	0.0370331	0.025569	3	EDN1/PROK2/PTGS2
GO:1905330	regulation of morphogenesis of an epithelium	3/114	65/18903	0.00711276	0.0370331	0.025569	3	ITGAX/NOG/NTN4
GO:1905953	negative regulation of lipid localization	3/114	65/18903	0.00711276	0.0370331	0.025569	3	IL6/ITGB3/THBS1
GO:0072577	endothelial cell apoptotic process	3/114	66/18903	0.00741918	0.038554	0.0266191	3	FGA/SERPINE1/THBS1
GO:1901653	cellular response to peptide	7/114	373/18903	0.0074678	0.038732	0.026742	7	EDN1/FPR2/GDF15/IL1B/INHBA/ITGB3/SOCS3
GO:0002460	adaptive immune response based on somatic recombination of immune receptors built from immunoglobulin superfamily domains	7/114	375/18903	0.00767973	0.039242	0.0270941	7	HLA-DRB4/HLA-H/IL1B/IL4I1/IL6/NLRP3/SLC11A1
GO:0010888	negative regulation of lipid storage	2/114	22/18903	0.00769708	0.039242	0.0270941	2	IL6/ITGB3
GO:0032303	regulation of icosanoid secretion	2/114	22/18903	0.00769708	0.039242	0.0270941	2	EDN1/IL1B
GO:0033630	positive regulation of cell adhesion mediated by integrin	2/114	22/18903	0.00769708	0.039242	0.0270941	2	ITGB3/TGFB2
GO:0035313	wound healing, spreading of epidermal cells	2/114	22/18903	0.00769708	0.039242	0.0270941	2	HBEGF/ITGA5
GO:0035809	regulation of urine volume	2/114	22/18903	0.00769708	0.039242	0.0270941	2	ADM/EDN1
GO:0044546	NLRP3 inflammasome complex assembly	2/114	22/18903	0.00769708	0.039242	0.0270941	2	MEFV/NLRP3
GO:0072574	hepatocyte proliferation	2/114	22/18903	0.00769708	0.039242	0.0270941	2	CEBPB/IL6
GO:0072575	epithelial cell proliferation involved in liver morphogenesis	2/114	22/18903	0.00769708	0.039242	0.0270941	2	CEBPB/IL6
GO:0042531	positive regulation of tyrosine phosphorylation of STAT protein	3/114	67/18903	0.00773331	0.0392782	0.0271191	3	CSF2/IL6/OSM
GO:0070613	regulation of protein processing	3/114	67/18903	0.00773331	0.0392782	0.0271191	3	PLAUR/SERPINE1/THBS1
GO:0050767	regulation of neurogenesis	7/114	377/18903	0.00789608	0.0400296	0.0276378	7	FN1/IL1B/IL6/L1CAM/MME/NOG/SEMA3B
GO:0045670	regulation of osteoclast differentiation	3/114	68/18903	0.0080552	0.0407596	0.0281419	3	CEBPB/FSTL3/TNFAIP6
GO:0043281	regulation of cysteine-type endopeptidase activity involved in apoptotic process	5/114	205/18903	0.00808318	0.0408246	0.0281868	5	CCN1/NLRP3/PLAUR/PTGS2/THBS1
GO:0010595	positive regulation of endothelial cell migration	4/114	131/18903	0.00817592	0.0412158	0.0284569	4	EDN1/ITGB3/PTGS2/THBS1
GO:0002689	negative regulation of leukocyte chemotaxis	2/114	23/18903	0.00839714	0.0418615	0.0289027	2	DUSP1/TNFAIP6
GO:0003283	atrial septum development	2/114	23/18903	0.00839714	0.0418615	0.0289027	2	CCN1/TGFB2
GO:0023058	adaptation of signaling pathway	2/114	23/18903	0.00839714	0.0418615	0.0289027	2	ADM/APLN
GO:0045723	positive regulation of fatty acid biosynthetic process	2/114	23/18903	0.00839714	0.0418615	0.0289027	2	IL1B/PTGS2
GO:0048143	astrocyte activation	2/114	23/18903	0.00839714	0.0418615	0.0289027	2	IL1B/IL6
GO:0072576	liver morphogenesis	2/114	23/18903	0.00839714	0.0418615	0.0289027	2	CEBPB/IL6
GO:0051051	negative regulation of transport	8/114	479/18903	0.00850953	0.0423435	0.0292355	8	EDN1/IL11/IL1B/INHBA/ITGB3/OSM/PTGS2/THBS1
GO:0002244	hematopoietic progenitor cell differentiation	4/114	133/18903	0.0086138	0.0427835	0.0295392	4	FSTL3/INHBA/OSM/ZFP36
GO:0014823	response to activity	3/114	70/18903	0.00872242	0.0430849	0.0297474	3	EDN1/IL6/ITGB3
GO:0043489	RNA stabilization	3/114	70/18903	0.00872242	0.0430849	0.0297474	3	IGF2BP1/SLC11A1/ZFP36
GO:1902373	negative regulation of mRNA catabolic process	3/114	70/18903	0.00872242	0.0430849	0.0297474	3	IGF2BP1/SLC11A1/ZFP36
GO:0035270	endocrine system development	4/114	135/18903	0.00906677	0.0441818	0.0305047	4	EDN1/IL6/NOG/TG
GO:0009612	response to mechanical stimulus	5/114	211/18903	0.00908997	0.0441818	0.0305047	5	EDN1/IL1B/ITGB3/PTGS2/THBS1
GO:0003181	atrioventricular valve morphogenesis	2/114	24/18903	0.00912468	0.0441818	0.0305047	2	CCN1/TGFB2
GO:0006925	inflammatory cell apoptotic process	2/114	24/18903	0.00912468	0.0441818	0.0305047	2	HCAR2/IL6
GO:0010226	response to lithium ion	2/114	24/18903	0.00912468	0.0441818	0.0305047	2	FABP4/PTGS2
GO:0036120	cellular response to platelet-derived growth factor stimulus	2/114	24/18903	0.00912468	0.0441818	0.0305047	2	HAS1/ITGB3
GO:0040037	negative regulation of fibroblast growth factor receptor signaling pathway	2/114	24/18903	0.00912468	0.0441818	0.0305047	2	APLN/THBS1
GO:0051043	regulation of membrane protein ectodomain proteolysis	2/114	24/18903	0.00912468	0.0441818	0.0305047	2	IL1B/TIMP1
GO:0060352	cell adhesion molecule production	2/114	24/18903	0.00912468	0.0441818	0.0305047	2	CXCL8/IL1B
GO:0140632	inflammasome complex assembly	2/114	24/18903	0.00912468	0.0441818	0.0305047	2	MEFV/NLRP3
GO:2000637	positive regulation of miRNA-mediated gene silencing	2/114	24/18903	0.00912468	0.0441818	0.0305047	2	IL6/ZFP36
GO:0042098	T cell proliferation	5/114	212/18903	0.00926581	0.0447847	0.030921	5	CEBPB/IL1B/IL4I1/IL6/SLC11A1
GO:0007498	mesoderm development	4/114	136/18903	0.00929897	0.0448646	0.0309762	4	INHBA/ITGB3/NOG/SNAI1
GO:0060411	cardiac septum morphogenesis	3/114	72/18903	0.00942115	0.045292	0.0312712	3	CCN1/NOG/TGFB2
GO:1903317	regulation of protein maturation	3/114	72/18903	0.00942115	0.045292	0.0312712	3	PLAUR/SERPINE1/THBS1
GO:0045637	regulation of myeloid cell differentiation	5/114	214/18903	0.00962451	0.0461874	0.0318894	5	CEBPB/FSTL3/INHBA/TNFAIP6/ZFP36
GO:0071260	cellular response to mechanical stimulus	3/114	73/18903	0.00978243	0.0468618	0.0323551	3	IL1B/ITGB3/PTGS2
GO:0034114	regulation of heterotypic cell-cell adhesion	2/114	25/18903	0.00987935	0.0469095	0.032388	2	FGA/IL1B
GO:0060148	positive regulation of post-transcriptional gene silencing	2/114	25/18903	0.00987935	0.0469095	0.032388	2	IL6/ZFP36
GO:0090023	positive regulation of neutrophil chemotaxis	2/114	25/18903	0.00987935	0.0469095	0.032388	2	CXCL8/EDN1
GO:1900370	positive regulation of post-transcriptional gene silencing by RNA	2/114	25/18903	0.00987935	0.0469095	0.032388	2	IL6/ZFP36
GO:2000193	positive regulation of fatty acid transport	2/114	25/18903	0.00987935	0.0469095	0.032388	2	EDN1/IL1B
GO:0003281	ventricular septum development	3/114	74/18903	0.0101517	0.0480335	0.0331641	3	CCN1/NOG/TGFB2
GO:0032732	positive regulation of interleukin-1 production	3/114	74/18903	0.0101517	0.0480335	0.0331641	3	IL6/MEFV/NLRP3
GO:0002705	positive regulation of leukocyte mediated immunity	4/114	140/18903	0.0102665	0.0484916	0.0334803	4	HLA-H/IL1B/IL6/NLRP3
GO:0021700	developmental maturation	6/114	304/18903	0.0103226	0.0485864	0.0335458	6	EDN1/EREG/NTN4/PTPRN/RAB32/TGFB2
GO:0051047	positive regulation of secretion	6/114	304/18903	0.0103226	0.0485864	0.0335458	6	EDN1/FGA/HCAR2/IL1B/INHBA/TGFB2
GO:0002573	myeloid leukocyte differentiation	5/114	218/18903	0.0103704	0.0486417	0.033584	5	CEBPB/CSF2/FSTL3/INHBA/TNFAIP6
GO:0043491	protein kinase B signaling	5/114	218/18903	0.0103704	0.0486417	0.033584	5	GDF15/HBEGF/IL1B/OSM/THBS1
GO:0032890	regulation of organic acid transport	3/114	75/18903	0.010529	0.0491291	0.0339205	3	EDN1/IL1B/THBS1
GO:0045669	positive regulation of osteoblast differentiation	3/114	75/18903	0.010529	0.0491291	0.0339205	3	CCN1/CEBPB/IL6
GO:2000242	negative regulation of reproductive process	3/114	75/18903	0.010529	0.0491291	0.0339205	3	DUSP1/SNAI1/TIMP1
GO:0071375	cellular response to peptide hormone stimulus	6/114	306/18903	0.0106377	0.049149	0.0339342	6	EDN1/GDF15/IL1B/INHBA/ITGB3/SOCS3
GO:0010259	multicellular organism aging	2/114	26/18903	0.0106608	0.049149	0.0339342	2	EDN1/INHBA
GO:0033598	mammary gland epithelial cell proliferation	2/114	26/18903	0.0106608	0.049149	0.0339342	2	AREG/CEBPB
GO:0036119	response to platelet-derived growth factor	2/114	26/18903	0.0106608	0.049149	0.0339342	2	HAS1/ITGB3
GO:0050995	negative regulation of lipid catabolic process	2/114	26/18903	0.0106608	0.049149	0.0339342	2	HCAR2/IL1B
GO:0060561	apoptotic process involved in morphogenesis	2/114	26/18903	0.0106608	0.049149	0.0339342	2	CCN1/TGFB2
GO:1900151	regulation of nuclear-transcribed mRNA catabolic process, deadenylation-dependent decay	2/114	26/18903	0.0106608	0.049149	0.0339342	2	IGF2BP1/ZFP36
GO:0038061	NIK/NF-kappaB signaling	4/114	142/18903	0.0107738	0.0495852	0.0342354	4	ADGRG3/EDN1/IL1B/NLRP3
GO:0060420	regulation of heart growth	3/114	76/18903	0.0109143	0.0501463	0.0346228	3	DUSP6/EDN1/NOG
GO:0007162	negative regulation of cell adhesion	6/114	308/18903	0.0109596	0.0502688	0.0347074	6	CEBPB/DUSP1/IL4I1/SERPINE1/TGFBI/THBS1
GO:0033135	regulation of peptidyl-serine phosphorylation	4/114	143/18903	0.0110334	0.0504358	0.0348227	4	IL11/IL6/OSM/PTGS2
GO:0045727	positive regulation of translation	4/114	143/18903	0.0110334	0.0504358	0.0348227	4	IGF2BP1/IL6/PIWIL2/THBS1
GO:0032729	positive regulation of interferon-gamma production	3/114	77/18903	0.0113077	0.0516023	0.0356281	3	IL1B/PDE4B/SLC11A1
GO:0003171	atrioventricular valve development	2/114	27/18903	0.0114687	0.0518108	0.035772	2	CCN1/TGFB2
GO:0010460	positive regulation of heart rate	2/114	27/18903	0.0114687	0.0518108	0.035772	2	ADM/EDN1
GO:0032682	negative regulation of chemokine production	2/114	27/18903	0.0114687	0.0518108	0.035772	2	IL6/MEFV
GO:0032740	positive regulation of interleukin-17 production	2/114	27/18903	0.0114687	0.0518108	0.035772	2	IL6/OSM
GO:0032753	positive regulation of interleukin-4 production	2/114	27/18903	0.0114687	0.0518108	0.035772	2	CEBPB/NLRP3
GO:0070269	pyroptosis	2/114	27/18903	0.0114687	0.0518108	0.035772	2	MEFV/NLRP3
GO:0050679	positive regulation of epithelial cell proliferation	5/114	224/18903	0.0115622	0.0520701	0.0359511	5	APLN/AREG/ITGB3/NOG/PTPRN
GO:0014065	phosphatidylinositol 3-kinase signaling	4/114	145/18903	0.0115647	0.0520701	0.0359511	4	EDN1/FN1/OSM/TGFB2
GO:0043154	negative regulation of cysteine-type endopeptidase activity involved in apoptotic process	3/114	78/18903	0.0117093	0.0525457	0.0362795	3	PLAUR/PTGS2/THBS1
GO:0030099	myeloid cell differentiation	7/114	407/18903	0.0117093	0.0525457	0.0362795	7	CEBPB/CSF2/FSTL3/IL11/INHBA/TNFAIP6/ZFP36
GO:0030072	peptide hormone secretion	5/114	225/18903	0.0117696	0.0527284	0.0364056	5	EDN1/FGA/IL1B/IL6/PTPRN
GO:0050768	negative regulation of neurogenesis	4/114	146/18903	0.0118364	0.05294	0.0365517	4	IL1B/IL6/NOG/SEMA3B
GO:0006909	phagocytosis	6/114	314/18903	0.0119668	0.0533461	0.0368321	6	FPR2/IL1B/ITGB3/PTX3/SLC11A1/THBS1
GO:0019932	second-messenger-mediated signaling	6/114	314/18903	0.0119668	0.0533461	0.0368321	6	ADM/CCL20/CXCL8/EDN1/FPR2/THBS1
GO:0002720	positive regulation of cytokine production involved in immune response	3/114	79/18903	0.0121189	0.0537578	0.0371163	3	IL1B/IL6/NLRP3
GO:0007193	adenylate cyclase-inhibiting G protein-coupled receptor signaling pathway	3/114	79/18903	0.0121189	0.0537578	0.0371163	3	EDN1/FPR2/ITGB3
GO:0048844	artery morphogenesis	3/114	79/18903	0.0121189	0.0537578	0.0371163	3	EDN1/NOG/TGFB2
GO:0010001	glial cell differentiation	5/114	227/18903	0.0121918	0.0539922	0.0372782	5	DNER/IL1B/IL6/NOG/VTN
GO:0030878	thyroid gland development	2/114	28/18903	0.0123027	0.0542161	0.0374328	2	EDN1/TG
GO:0071624	positive regulation of granulocyte chemotaxis	2/114	28/18903	0.0123027	0.0542161	0.0374328	2	CXCL8/EDN1
GO:1903019	negative regulation of glycoprotein metabolic process	2/114	28/18903	0.0123027	0.0542161	0.0374328	2	HBEGF/PTX3
GO:1902105	regulation of leukocyte differentiation	6/114	317/18903	0.0124941	0.0549701	0.0379533	6	CEBPB/FSTL3/IL4I1/INHBA/NLRP3/TNFAIP6
GO:0003151	outflow tract morphogenesis	3/114	80/18903	0.0125367	0.0549782	0.0379589	3	EDN1/NOG/TGFB2
GO:0014068	positive regulation of phosphatidylinositol 3-kinase signaling	3/114	80/18903	0.0125367	0.0549782	0.0379589	3	FN1/OSM/TGFB2
GO:1903706	regulation of hemopoiesis	7/114	413/18903	0.0126089	0.0552047	0.0381153	7	CEBPB/FSTL3/IL4I1/INHBA/NLRP3/TNFAIP6/ZFP36
GO:0009411	response to UV	4/114	149/18903	0.0126761	0.055409	0.0382564	4	MME/MMP3/PTGS2/TIMP1
GO:0002790	peptide secretion	5/114	230/18903	0.0128443	0.0560535	0.0387013	5	EDN1/FGA/IL1B/IL6/PTPRN
GO:0050769	positive regulation of neurogenesis	5/114	231/18903	0.0130669	0.056933	0.0393086	5	FN1/IL1B/IL6/L1CAM/MME
GO:0010955	negative regulation of protein processing	2/114	29/18903	0.0131624	0.0570723	0.0394048	2	SERPINE1/THBS1
GO:0034698	response to gonadotropin	2/114	29/18903	0.0131624	0.0570723	0.0394048	2	EDN1/INHBA
GO:1903318	negative regulation of protein maturation	2/114	29/18903	0.0131624	0.0570723	0.0394048	2	SERPINE1/THBS1
GO:0046718	viral entry into host cell	4/114	151/18903	0.0132565	0.0572961	0.0395593	4	ANPEP/ITGA5/ITGB3/PTX3
GO:0051961	negative regulation of nervous system development	4/114	151/18903	0.0132565	0.0572961	0.0395593	4	IL1B/IL6/NOG/SEMA3B
GO:0048708	astrocyte differentiation	3/114	82/18903	0.013397	0.0575345	0.0397238	3	IL1B/IL6/NOG
GO:0060395	SMAD protein signal transduction	3/114	82/18903	0.013397	0.0575345	0.0397238	3	GDF15/INHBA/TGFB2
GO:1902369	negative regulation of RNA catabolic process	3/114	82/18903	0.013397	0.0575345	0.0397238	3	IGF2BP1/SLC11A1/ZFP36
GO:2000736	regulation of stem cell differentiation	3/114	82/18903	0.013397	0.0575345	0.0397238	3	OSM/TGFB2/ZFP36
GO:0060560	developmental growth involved in morphogenesis	5/114	233/18903	0.0135201	0.0579708	0.0400251	5	AREG/EDN1/FN1/L1CAM/SEMA3B
GO:0030098	lymphocyte differentiation	7/114	419/18903	0.0135573	0.0580383	0.0400718	7	ADGRG3/IL11/IL1B/IL4I1/IL6/INHBA/NLRP3
GO:0014032	neural crest cell development	3/114	83/18903	0.0138394	0.059152	0.0408407	3	EDN1/FN1/SEMA3B
GO:0001556	oocyte maturation	2/114	30/18903	0.0140476	0.059488	0.0410727	2	EDN1/EREG
GO:0002825	regulation of T-helper 1 type immune response	2/114	30/18903	0.0140476	0.059488	0.0410727	2	IL1B/SLC11A1
GO:0019886	antigen processing and presentation of exogenous peptide antigen via MHC class II	2/114	30/18903	0.0140476	0.059488	0.0410727	2	CTSE/HLA-DRB4
GO:0070293	renal absorption	2/114	30/18903	0.0140476	0.059488	0.0410727	2	EDN1/HBB
GO:0070498	interleukin-1-mediated signaling pathway	2/114	30/18903	0.0140476	0.059488	0.0410727	2	IL1B/IL6
GO:0001558	regulation of cell growth	7/114	422/18903	0.0140504	0.059488	0.0410727	7	EDN1/FN1/HBEGF/INHBA/L1CAM/SEMA3B/TGFB2
GO:0045834	positive regulation of lipid metabolic process	4/114	154/18903	0.0141585	0.0597581	0.0412591	4	ADM/CCN1/IL1B/PTGS2
GO:0098754	detoxification	4/114	154/18903	0.0141585	0.0597581	0.0412591	4	HBA1/HBA2/HBB/PTGS2
GO:0032368	regulation of lipid transport	4/114	155/18903	0.0144676	0.0608722	0.0420283	4	EDN1/IL1B/ITGB3/THBS1
GO:1905039	carboxylic acid transmembrane transport	4/114	155/18903	0.0144676	0.0608722	0.0420283	4	SLC11A1/SLC22A4/SLC7A2/THBS1
GO:0008625	extrinsic apoptotic signaling pathway via death domain receptors	3/114	85/18903	0.0147491	0.06196	0.0427794	3	FGA/SERPINE1/THBS1
GO:1903825	organic acid transmembrane transport	4/114	156/18903	0.0147809	0.0619972	0.0428051	4	SLC11A1/SLC22A4/SLC7A2/THBS1
GO:0031069	hair follicle morphogenesis	2/114	31/18903	0.0149578	0.0622549	0.042983	2	SNAI1/TGFB2
GO:0033688	regulation of osteoblast proliferation	2/114	31/18903	0.0149578	0.0622549	0.042983	2	CCN1/ITGB3
GO:0060055	angiogenesis involved in wound healing	2/114	31/18903	0.0149578	0.0622549	0.042983	2	ITGB3/SERPINE1
GO:0061311	cell surface receptor signaling pathway involved in heart development	2/114	31/18903	0.0149578	0.0622549	0.042983	2	NOG/SNAI1
GO:1902042	negative regulation of extrinsic apoptotic signaling pathway via death domain receptors	2/114	31/18903	0.0149578	0.0622549	0.042983	2	FGA/SERPINE1
GO:0022412	cellular process involved in reproduction in multicellular organism	7/114	430/18903	0.015428	0.0640586	0.0442284	7	EDN1/EREG/FOLR3/INHBA/PIWIL2/PTX3/TNFAIP6
GO:0002703	regulation of leukocyte mediated immunity	5/114	241/18903	0.0154387	0.0640586	0.0442284	5	HLA-H/IL1B/IL4I1/IL6/NLRP3
GO:0002440	production of molecular mediator of immune response	6/114	333/18903	0.0155857	0.0644157	0.0444749	6	HLA-DRB4/IL1B/IL6/NLRP3/TGFB2/TREM1
GO:0008543	fibroblast growth factor receptor signaling pathway	3/114	87/18903	0.0156919	0.0644157	0.0444749	3	APLN/NOG/THBS1
GO:0010232	vascular transport	3/114	87/18903	0.0156919	0.0644157	0.0444749	3	SLC2A3/SLC4A4/SLC7A2
GO:0014910	regulation of smooth muscle cell migration	3/114	87/18903	0.0156919	0.0644157	0.0444749	3	ITGB3/SERPINE1/VTN
GO:0019915	lipid storage	3/114	87/18903	0.0156919	0.0644157	0.0444749	3	IL1B/IL6/ITGB3
GO:0048145	regulation of fibroblast proliferation	3/114	87/18903	0.0156919	0.0644157	0.0444749	3	EREG/FN1/ITGB3
GO:0150104	transport across blood-brain barrier	3/114	87/18903	0.0156919	0.0644157	0.0444749	3	SLC2A3/SLC4A4/SLC7A2
GO:0007435	salivary gland morphogenesis	2/114	32/18903	0.0158928	0.0644555	0.0445024	2	NTN4/TGFB2
GO:0010743	regulation of macrophage derived foam cell differentiation	2/114	32/18903	0.0158928	0.0644555	0.0445024	2	CSF2/ITGB3
GO:0045671	negative regulation of osteoclast differentiation	2/114	32/18903	0.0158928	0.0644555	0.0445024	2	FSTL3/TNFAIP6
GO:0048710	regulation of astrocyte differentiation	2/114	32/18903	0.0158928	0.0644555	0.0445024	2	IL6/NOG
GO:0060674	placenta blood vessel development	2/114	32/18903	0.0158928	0.0644555	0.0445024	2	CCN1/SOCS3
GO:0061384	heart trabecula morphogenesis	2/114	32/18903	0.0158928	0.0644555	0.0445024	2	NOG/TGFB2
GO:1901889	negative regulation of cell junction assembly	2/114	32/18903	0.0158928	0.0644555	0.0445024	2	IL1B/THBS1
GO:1990776	response to angiotensin	2/114	32/18903	0.0158928	0.0644555	0.0445024	2	INHBA/PTGS2
GO:0060562	epithelial tube morphogenesis	6/114	335/18903	0.0160063	0.0648183	0.0447529	6	ADM/AREG/EDN1/ITGAX/NOG/TGFB2
GO:0048864	stem cell development	3/114	89/18903	0.016668	0.0673968	0.0465331	3	EDN1/FN1/SEMA3B
GO:0002828	regulation of type 2 immune response	2/114	33/18903	0.0168522	0.0675091	0.0466107	2	IL6/NLRP3
GO:0043171	peptide catabolic process	2/114	33/18903	0.0168522	0.0675091	0.0466107	2	ANPEP/MME
GO:0045577	regulation of B cell differentiation	2/114	33/18903	0.0168522	0.0675091	0.0466107	2	IL4I1/INHBA
GO:0045907	positive regulation of vasoconstriction	2/114	33/18903	0.0168522	0.0675091	0.0466107	2	FGA/PTGS2
GO:0048566	embryonic digestive tract development	2/114	33/18903	0.0168522	0.0675091	0.0466107	2	CXCL8/TGFB2
GO:0070633	transepithelial transport	2/114	33/18903	0.0168522	0.0675091	0.0466107	2	CSF2/EDN1
GO:0062012	regulation of small molecule metabolic process	6/114	339/18903	0.016871	0.0675091	0.0466107	6	ADM/IL1B/NNMT/PTGS2/SLC4A4/SNAI1
GO:0031330	negative regulation of cellular catabolic process	5/114	247/18903	0.0169918	0.0678916	0.0468748	5	IGF2BP1/MAGEA6/SLC11A1/TIMP1/ZFP36
GO:0030856	regulation of epithelial cell differentiation	4/114	164/18903	0.0174429	0.0695911	0.0480482	4	CEBPB/IL1B/SERPINE1/ZFP36
GO:0045926	negative regulation of growth	5/114	249/18903	0.0175317	0.069842	0.0482214	5	GDF15/INHBA/NOG/SEMA3B/TGFB2
GO:0001942	hair follicle development	3/114	91/18903	0.0176775	0.0700191	0.0483437	3	INHBA/SNAI1/TGFB2
GO:0060021	roof of mouth development	3/114	91/18903	0.0176775	0.0700191	0.0483437	3	INHBA/SNAI1/TGFB2
GO:2000117	negative regulation of cysteine-type endopeptidase activity	3/114	91/18903	0.0176775	0.0700191	0.0483437	3	PLAUR/PTGS2/THBS1
GO:0002495	antigen processing and presentation of peptide antigen via MHC class II	2/114	34/18903	0.0178358	0.0700191	0.0483437	2	CTSE/HLA-DRB4
GO:0007431	salivary gland development	2/114	34/18903	0.0178358	0.0700191	0.0483437	2	NTN4/TGFB2
GO:0032743	positive regulation of interleukin-2 production	2/114	34/18903	0.0178358	0.0700191	0.0483437	2	IL1B/PDE4B
GO:0034405	response to fluid shear stress	2/114	34/18903	0.0178358	0.0700191	0.0483437	2	CSF2/PTGS2
GO:0048333	mesodermal cell differentiation	2/114	34/18903	0.0178358	0.0700191	0.0483437	2	INHBA/ITGB3
GO:0060563	neuroepithelial cell differentiation	2/114	34/18903	0.0178358	0.0700191	0.0483437	2	CEBPB/SERPINE1
GO:1902624	positive regulation of neutrophil migration	2/114	34/18903	0.0178358	0.0700191	0.0483437	2	CXCL8/EDN1
GO:0050870	positive regulation of T cell activation	5/114	251/18903	0.0180829	0.0708862	0.0489423	5	HLA-DRB4/IL1B/IL4I1/IL6/NLRP3
GO:0001843	neural tube closure	3/114	92/18903	0.0181948	0.071221	0.0491735	3	ADM/NOG/TGFB2
GO:0098657	import into cell	5/114	252/18903	0.0183628	0.0717746	0.0495558	5	ITGB3/SLC22A4/SLC2A3/SLC7A2/THBS1
GO:0019216	regulation of lipid metabolic process	6/114	347/18903	0.0186963	0.072085	0.04977	6	ADM/CCN1/HCAR2/IL1B/PTGS2/SNAI1
GO:0030516	regulation of axon extension	3/114	93/18903	0.0187204	0.072085	0.04977	3	FN1/L1CAM/SEMA3B
GO:0044070	regulation of anion transport	3/114	93/18903	0.0187204	0.072085	0.04977	3	CEBPB/EDN1/IL1B
GO:0055017	cardiac muscle tissue growth	3/114	93/18903	0.0187204	0.072085	0.04977	3	EDN1/NOG/TGFB2
GO:0060606	tube closure	3/114	93/18903	0.0187204	0.072085	0.04977	3	ADM/NOG/TGFB2
GO:0002446	neutrophil mediated immunity	2/114	35/18903	0.0188431	0.072085	0.04977	2	IL6/TREM1
GO:0032633	interleukin-4 production	2/114	35/18903	0.0188431	0.072085	0.04977	2	CEBPB/NLRP3
GO:0032673	regulation of interleukin-4 production	2/114	35/18903	0.0188431	0.072085	0.04977	2	CEBPB/NLRP3
GO:0035633	maintenance of blood-brain barrier	2/114	35/18903	0.0188431	0.072085	0.04977	2	IL6/PTGS2
GO:0048730	epidermis morphogenesis	2/114	35/18903	0.0188431	0.072085	0.04977	2	SNAI1/TGFB2
GO:0060218	hematopoietic stem cell differentiation	2/114	35/18903	0.0188431	0.072085	0.04977	2	OSM/ZFP36
GO:1901099	negative regulation of signal transduction in absence of ligand	2/114	35/18903	0.0188431	0.072085	0.04977	2	CSF2/IL1B
GO:2000352	negative regulation of endothelial cell apoptotic process	2/114	35/18903	0.0188431	0.072085	0.04977	2	FGA/SERPINE1
GO:2000406	positive regulation of T cell migration	2/114	35/18903	0.0188431	0.072085	0.04977	2	CCL20/ITGB3
GO:2001240	negative regulation of extrinsic apoptotic signaling pathway in absence of ligand	2/114	35/18903	0.0188431	0.072085	0.04977	2	CSF2/IL1B
GO:0015833	peptide transport	5/114	254/18903	0.0189311	0.072226	0.0498674	5	EDN1/FGA/IL1B/IL6/PTPRN
GO:0070661	leukocyte proliferation	6/114	348/18903	0.0189336	0.072226	0.0498674	6	CEBPB/CSF2/IL1B/IL4I1/IL6/SLC11A1
GO:0022404	molting cycle process	3/114	94/18903	0.0192545	0.0731398	0.0504983	3	INHBA/SNAI1/TGFB2
GO:0022405	hair cycle process	3/114	94/18903	0.0192545	0.0731398	0.0504983	3	INHBA/SNAI1/TGFB2
GO:1903312	negative regulation of mRNA metabolic process	3/114	94/18903	0.0192545	0.0731398	0.0504983	3	IGF2BP1/SLC11A1/ZFP36
GO:0014909	smooth muscle cell migration	3/114	95/18903	0.0197969	0.0747559	0.0516142	3	ITGB3/SERPINE1/VTN
GO:0098773	skin epidermis development	3/114	95/18903	0.0197969	0.0747559	0.0516142	3	INHBA/SNAI1/TGFB2
GO:1903510	mucopolysaccharide metabolic process	3/114	95/18903	0.0197969	0.0747559	0.0516142	3	HAS1/IL1B/TNFAIP6
GO:0050708	regulation of protein secretion	5/114	257/18903	0.0198051	0.0747559	0.0516142	5	FGA/HCAR2/IL1B/IL6/TGFB2
GO:0018149	peptide cross-linking	2/114	36/18903	0.0198739	0.0747559	0.0516142	2	FN1/THBS1
GO:0033687	osteoblast proliferation	2/114	36/18903	0.0198739	0.0747559	0.0516142	2	CCN1/ITGB3
GO:1905332	positive regulation of morphogenesis of an epithelium	2/114	36/18903	0.0198739	0.0747559	0.0516142	2	ITGAX/NOG
GO:0003007	heart morphogenesis	5/114	258/18903	0.0201023	0.0755095	0.0521345	5	CCN1/EDN1/NOG/SNAI1/TGFB2
GO:0014033	neural crest cell differentiation	3/114	96/18903	0.0203477	0.0761534	0.0525791	3	EDN1/FN1/SEMA3B
GO:0045807	positive regulation of endocytosis	3/114	96/18903	0.0203477	0.0761534	0.0525791	3	APLN/SERPINE1/VTN
GO:0007259	receptor signaling pathway via JAK-STAT	4/114	172/18903	0.0203866	0.0761534	0.0525791	4	CSF2/IL6/OSM/SOCS3
GO:1990138	neuron projection extension	4/114	172/18903	0.0203866	0.0761534	0.0525791	4	EDN1/FN1/L1CAM/SEMA3B
GO:0034110	regulation of homotypic cell-cell adhesion	2/114	37/18903	0.0209279	0.0779593	0.0538259	2	IL6/PLAUR
GO:0050931	pigment cell differentiation	2/114	37/18903	0.0209279	0.0779593	0.0538259	2	ADAMTSL4/RAB32
GO:0045927	positive regulation of growth	5/114	261/18903	0.0210112	0.0781617	0.0539657	5	EDN1/FN1/HBEGF/L1CAM/TGFB2
GO:0006937	regulation of muscle contraction	4/114	174/18903	0.0211675	0.0786345	0.0542921	4	EDN1/PDE4B/PROK2/PTGS2
GO:0014020	primary neural tube formation	3/114	98/18903	0.0214745	0.079447	0.054853	3	ADM/NOG/TGFB2
GO:0032642	regulation of chemokine production	3/114	98/18903	0.0214745	0.079447	0.054853	3	IL1B/IL6/MEFV
GO:0120162	positive regulation of cold-induced thermogenesis	3/114	98/18903	0.0214745	0.079447	0.054853	3	CEBPB/FABP4/G0S2
GO:0009306	protein secretion	6/114	359/18903	0.0216813	0.0801021	0.0553054	6	FGA/HCAR2/IL1B/IL6/PTPRN/TGFB2
GO:0035592	establishment of protein localization to extracellular region	6/114	360/18903	0.0219438	0.0804741	0.0555622	6	FGA/HCAR2/IL1B/IL6/PTPRN/TGFB2
GO:0032635	interleukin-6 production	4/114	176/18903	0.0219665	0.0804741	0.0555622	4	CEBPB/EREG/IL1B/IL6
GO:0032675	regulation of interleukin-6 production	4/114	176/18903	0.0219665	0.0804741	0.0555622	4	CEBPB/EREG/IL1B/IL6
GO:0010742	macrophage derived foam cell differentiation	2/114	38/18903	0.0220047	0.0804741	0.0555622	2	CSF2/ITGB3
GO:0042092	type 2 immune response	2/114	38/18903	0.0220047	0.0804741	0.0555622	2	IL6/NLRP3
GO:0045773	positive regulation of axon extension	2/114	38/18903	0.0220047	0.0804741	0.0555622	2	FN1/L1CAM
GO:0072337	modified amino acid transport	2/114	38/18903	0.0220047	0.0804741	0.0555622	2	FOLR3/SLC22A4
GO:0006885	regulation of pH	3/114	99/18903	0.0220506	0.0804741	0.0555622	3	EDN1/SLC11A1/SLC4A4
GO:0032755	positive regulation of interleukin-6 production	3/114	99/18903	0.0220506	0.0804741	0.0555622	3	EREG/IL1B/IL6
GO:0002443	leukocyte mediated immunity	7/114	463/18903	0.0221368	0.0806796	0.0557041	7	HLA-DRB4/HLA-H/IL1B/IL4I1/IL6/NLRP3/TREM1
GO:0001776	leukocyte homeostasis	3/114	100/18903	0.022635	0.0821623	0.0567278	3	HCAR2/IL6/PDE4B
GO:0002532	production of molecular mediator involved in inflammatory response	3/114	100/18903	0.022635	0.0821623	0.0567278	3	IL6/MEFV/SERPINE1
GO:0030316	osteoclast differentiation	3/114	100/18903	0.022635	0.0821623	0.0567278	3	CEBPB/FSTL3/TNFAIP6
GO:0048015	phosphatidylinositol-mediated signaling	4/114	178/18903	0.0227837	0.082591	0.0570238	4	EDN1/FN1/OSM/TGFB2
GO:0032570	response to progesterone	2/114	39/18903	0.0231041	0.0833043	0.0575163	2	TGFB2/THBS1
GO:0033028	myeloid cell apoptotic process	2/114	39/18903	0.0231041	0.0833043	0.0575163	2	HCAR2/IL6
GO:0060251	regulation of glial cell proliferation	2/114	39/18903	0.0231041	0.0833043	0.0575163	2	IL1B/IL6
GO:0090077	foam cell differentiation	2/114	39/18903	0.0231041	0.0833043	0.0575163	2	CSF2/ITGB3
GO:2001243	negative regulation of intrinsic apoptotic signaling pathway	3/114	101/18903	0.0232278	0.0836388	0.0577472	3	PLAUR/PTGS2/SNAI1
GO:0046700	heterocycle catabolic process	7/114	468/18903	0.0233059	0.0838081	0.0578641	7	IGF2BP1/IL4I1/IL6/NT5E/PDE4B/SLC11A1/ZFP36
GO:0070663	regulation of leukocyte proliferation	5/114	269/18903	0.0235653	0.0846281	0.0584303	5	CEBPB/CSF2/IL1B/IL4I1/IL6
GO:0035265	organ growth	4/114	180/18903	0.0236193	0.0847093	0.0584863	4	DUSP6/EDN1/NOG/TGFB2
GO:0002449	lymphocyte mediated immunity	6/114	367/18903	0.0238418	0.0853934	0.0589586	6	HLA-DRB4/HLA-H/IL1B/IL4I1/IL6/NLRP3
GO:0043409	negative regulation of MAPK cascade	4/114	181/18903	0.0240441	0.0858562	0.0592782	4	DUSP1/DUSP6/IL1B/PTPRR
GO:0071692	protein localization to extracellular region	6/114	368/18903	0.0241216	0.0858562	0.0592782	6	FGA/HCAR2/IL1B/IL6/PTPRN/TGFB2
GO:0001953	negative regulation of cell-matrix adhesion	2/114	40/18903	0.0242256	0.0858562	0.0592782	2	SERPINE1/THBS1
GO:0002478	antigen processing and presentation of exogenous peptide antigen	2/114	40/18903	0.0242256	0.0858562	0.0592782	2	CTSE/HLA-DRB4
GO:0032965	regulation of collagen biosynthetic process	2/114	40/18903	0.0242256	0.0858562	0.0592782	2	IL6/INHBA
GO:0045923	positive regulation of fatty acid metabolic process	2/114	40/18903	0.0242256	0.0858562	0.0592782	2	IL1B/PTGS2
GO:0046627	negative regulation of insulin receptor signaling pathway	2/114	40/18903	0.0242256	0.0858562	0.0592782	2	IL1B/SOCS3
GO:1901532	regulation of hematopoietic progenitor cell differentiation	2/114	40/18903	0.0242256	0.0858562	0.0592782	2	OSM/ZFP36
GO:0032677	regulation of interleukin-8 production	3/114	103/18903	0.0244387	0.0860558	0.059416	3	IL1B/IL6/SERPINE1
GO:0046620	regulation of organ growth	3/114	103/18903	0.0244387	0.0860558	0.059416	3	DUSP6/EDN1/NOG
GO:0048144	fibroblast proliferation	3/114	103/18903	0.0244387	0.0860558	0.059416	3	EREG/FN1/ITGB3
GO:0070167	regulation of biomineral tissue development	3/114	103/18903	0.0244387	0.0860558	0.059416	3	CCN1/CEBPB/SRGN
GO:0042129	regulation of T cell proliferation	4/114	182/18903	0.0244734	0.0860558	0.059416	4	CEBPB/IL1B/IL4I1/IL6
GO:0048017	inositol lipid-mediated signaling	4/114	182/18903	0.0244734	0.0860558	0.059416	4	EDN1/FN1/OSM/TGFB2
GO:0044270	cellular nitrogen compound catabolic process	7/114	474/18903	0.0247645	0.086927	0.0600175	7	IGF2BP1/IL4I1/IL6/NT5E/PDE4B/SLC11A1/ZFP36
GO:0007219	Notch signaling pathway	4/114	183/18903	0.0249074	0.086927	0.0600175	4	DNER/MAGEA1/SNAI1/TGFB2
GO:0008361	regulation of cell size	4/114	183/18903	0.0249074	0.086927	0.0600175	4	EDN1/FN1/L1CAM/SEMA3B
GO:0071466	cellular response to xenobiotic stimulus	4/114	183/18903	0.0249074	0.086927	0.0600175	4	EDN1/IL1B/ITGB3/PDE4B
GO:0097696	receptor signaling pathway via STAT	4/114	183/18903	0.0249074	0.086927	0.0600175	4	CSF2/IL6/OSM/SOCS3
GO:0007611	learning or memory	5/114	273/18903	0.0249146	0.086927	0.0600175	5	CEBPB/ITGA5/MME/NOG/PTGS2
GO:0003333	amino acid transmembrane transport	3/114	104/18903	0.0250568	0.0871976	0.0602044	3	SLC11A1/SLC22A4/SLC7A2
GO:0032637	interleukin-8 production	3/114	104/18903	0.0250568	0.0871976	0.0602044	3	IL1B/IL6/SERPINE1
GO:0010719	negative regulation of epithelial to mesenchymal transition	2/114	41/18903	0.0253691	0.0877187	0.0605641	2	NOG/TGFB2
GO:0045124	regulation of bone resorption	2/114	41/18903	0.0253691	0.0877187	0.0605641	2	IL6/ITGB3
GO:1901223	negative regulation of NIK/NF-kappaB signaling	2/114	41/18903	0.0253691	0.0877187	0.0605641	2	ADGRG3/NLRP3
GO:1902742	apoptotic process involved in development	2/114	41/18903	0.0253691	0.0877187	0.0605641	2	CCN1/TGFB2
GO:1905314	semi-lunar valve development	2/114	41/18903	0.0253691	0.0877187	0.0605641	2	SNAI1/TGFB2
GO:1903039	positive regulation of leukocyte cell-cell adhesion	5/114	275/18903	0.0256075	0.0884294	0.0610548	5	HLA-DRB4/IL1B/IL4I1/IL6/NLRP3
GO:0110149	regulation of biomineralization	3/114	105/18903	0.0256832	0.0885776	0.0611572	3	CCN1/CEBPB/SRGN
GO:0051348	negative regulation of transferase activity	5/114	276/18903	0.0259585	0.0894127	0.0617337	5	DUSP1/FABP4/IL1B/PKIB/ZFP36
GO:0015698	inorganic anion transport	4/114	186/18903	0.0262372	0.0901422	0.0622374	4	CEBPB/SLC11A1/SLC4A4/TG
GO:0043405	regulation of MAP kinase activity	4/114	186/18903	0.0262372	0.0901422	0.0622374	4	DUSP1/EDN1/IL1B/THBS1
GO:0001841	neural tube formation	3/114	106/18903	0.0263181	0.0903052	0.0623499	3	ADM/NOG/TGFB2
GO:0050863	regulation of T cell activation	6/114	376/18903	0.0264403	0.090586	0.0625438	6	CEBPB/HLA-DRB4/IL1B/IL4I1/IL6/NLRP3
GO:0014002	astrocyte development	2/114	42/18903	0.0265343	0.090586	0.0625438	2	IL1B/IL6
GO:1900077	negative regulation of cellular response to insulin stimulus	2/114	42/18903	0.0265343	0.090586	0.0625438	2	IL1B/SOCS3
GO:2000403	positive regulation of lymphocyte migration	2/114	42/18903	0.0265343	0.090586	0.0625438	2	CCL20/ITGB3
GO:0002700	regulation of production of molecular mediator of immune response	4/114	187/18903	0.0266898	0.0910016	0.0628308	4	IL1B/IL6/NLRP3/TGFB2
GO:1903037	regulation of leukocyte cell-cell adhesion	6/114	377/18903	0.0267402	0.0910584	0.06287	6	CEBPB/HLA-DRB4/IL1B/IL4I1/IL6/NLRP3
GO:0003279	cardiac septum development	3/114	107/18903	0.0269613	0.091465	0.0631507	3	CCN1/NOG/TGFB2
GO:0014013	regulation of gliogenesis	3/114	107/18903	0.0269613	0.091465	0.0631507	3	IL1B/IL6/NOG
GO:0060840	artery development	3/114	107/18903	0.0269613	0.091465	0.0631507	3	EDN1/NOG/TGFB2
GO:0010721	negative regulation of cell development	4/114	188/18903	0.027147	0.0919793	0.0635058	4	IL1B/IL6/NOG/SEMA3B
GO:0002697	regulation of immune effector process	6/114	379/18903	0.0273468	0.0925283	0.0638849	6	HLA-H/IL1B/IL4I1/IL6/NLRP3/TGFB2
GO:0051896	regulation of protein kinase B signaling	4/114	189/18903	0.027609	0.0925283	0.0638849	4	GDF15/HBEGF/OSM/THBS1
GO:0071478	cellular response to radiation	4/114	189/18903	0.027609	0.0925283	0.0638849	4	MME/MMP3/PTGS2/TIMP1
GO:0014812	muscle cell migration	3/114	108/18903	0.0276129	0.0925283	0.0638849	3	ITGB3/SERPINE1/VTN
GO:0061387	regulation of extent of cell growth	3/114	108/18903	0.0276129	0.0925283	0.0638849	3	FN1/L1CAM/SEMA3B
GO:1902106	negative regulation of leukocyte differentiation	3/114	108/18903	0.0276129	0.0925283	0.0638849	3	FSTL3/INHBA/TNFAIP6
GO:0009154	purine ribonucleotide catabolic process	2/114	43/18903	0.0277208	0.0925283	0.0638849	2	NT5E/PDE4B
GO:0032691	negative regulation of interleukin-1 beta production	2/114	43/18903	0.0277208	0.0925283	0.0638849	2	MEFV/NLRP3
GO:0033574	response to testosterone	2/114	43/18903	0.0277208	0.0925283	0.0638849	2	EDN1/THBS1
GO:0042554	superoxide anion generation	2/114	43/18903	0.0277208	0.0925283	0.0638849	2	EDN1/FPR2
GO:0060412	ventricular septum morphogenesis	2/114	43/18903	0.0277208	0.0925283	0.0638849	2	NOG/TGFB2
GO:1904037	positive regulation of epithelial cell apoptotic process	2/114	43/18903	0.0277208	0.0925283	0.0638849	2	IL6/THBS1
GO:0098742	cell-cell adhesion via plasma-membrane adhesion molecules	5/114	282/18903	0.0281298	0.0937774	0.0647473	5	AMIGO2/ITGA5/L1CAM/PCDHB9/TGFB2
GO:0019439	aromatic compound catabolic process	7/114	489/18903	0.0286838	0.0955065	0.0659411	7	IGF2BP1/IL4I1/IL6/NT5E/PDE4B/SLC11A1/ZFP36
GO:0006509	membrane protein ectodomain proteolysis	2/114	44/18903	0.0289283	0.0956552	0.0660437	2	IL1B/TIMP1
GO:0014911	positive regulation of smooth muscle cell migration	2/114	44/18903	0.0289283	0.0956552	0.0660437	2	ITGB3/VTN
GO:0071526	semaphorin-plexin signaling pathway	2/114	44/18903	0.0289283	0.0956552	0.0660437	2	EDN1/SEMA3B
GO:1900026	positive regulation of substrate adhesion-dependent cell spreading	2/114	44/18903	0.0289283	0.0956552	0.0660437	2	FGA/ITGB3
GO:0006766	vitamin metabolic process	3/114	110/18903	0.0289413	0.0956552	0.0660437	3	NNMT/SLC2A3/SNAI1
GO:0045833	negative regulation of lipid metabolic process	3/114	110/18903	0.0289413	0.0956552	0.0660437	3	HCAR2/IL1B/SNAI1
GO:0014066	regulation of phosphatidylinositol 3-kinase signaling	3/114	111/18903	0.029618	0.0975332	0.0673404	3	FN1/OSM/TGFB2
GO:0032611	interleukin-1 beta production	3/114	111/18903	0.029618	0.0975332	0.0673404	3	IL6/MEFV/NLRP3
GO:0032651	regulation of interleukin-1 beta production	3/114	111/18903	0.029618	0.0975332	0.0673404	3	IL6/MEFV/NLRP3
GO:0016049	cell growth	7/114	493/18903	0.0297963	0.0980007	0.0676632	7	EDN1/FN1/HBEGF/INHBA/L1CAM/SEMA3B/TGFB2
GO:0010952	positive regulation of peptidase activity	4/114	194/18903	0.0299892	0.0985151	0.0680184	4	CCN1/FN1/MEFV/NLRP3
GO:0010712	regulation of collagen metabolic process	2/114	45/18903	0.0301565	0.0985843	0.0680662	2	IL6/INHBA
GO:0030574	collagen catabolic process	2/114	45/18903	0.0301565	0.0985843	0.0680662	2	ADAMTS3/MMP3
GO:0060964	regulation of miRNA-mediated gene silencing	2/114	45/18903	0.0301565	0.0985843	0.0680662	2	IL6/ZFP36
GO:1900744	regulation of p38MAPK cascade	2/114	45/18903	0.0301565	0.0985843	0.0680662	2	DUSP1/IL1B
GO:0006939	smooth muscle contraction	3/114	113/18903	0.0309964	0.101207	0.0698772	3	EDN1/PROK2/PTGS2
GO:0010837	regulation of keratinocyte proliferation	2/114	46/18903	0.0314052	0.101925	0.0703728	2	AREG/ZFP36
GO:0035272	exocrine system development	2/114	46/18903	0.0314052	0.101925	0.0703728	2	NTN4/TGFB2
GO:0042088	T-helper 1 type immune response	2/114	46/18903	0.0314052	0.101925	0.0703728	2	IL1B/SLC11A1
GO:0055010	ventricular cardiac muscle tissue morphogenesis	2/114	46/18903	0.0314052	0.101925	0.0703728	2	NOG/TGFB2
GO:0085029	extracellular matrix assembly	2/114	46/18903	0.0314052	0.101925	0.0703728	2	HAS1/NTN4
GO:1903707	negative regulation of hemopoiesis	3/114	114/18903	0.0316981	0.102752	0.0709438	3	FSTL3/INHBA/TNFAIP6
GO:0033559	unsaturated fatty acid metabolic process	3/114	115/18903	0.0324082	0.10441	0.0720883	3	EDN1/IL1B/PTGS2
GO:0048640	negative regulation of developmental growth	3/114	115/18903	0.0324082	0.10441	0.0720883	3	GDF15/NOG/SEMA3B
GO:0001935	endothelial cell proliferation	4/114	199/18903	0.0324876	0.10441	0.0720883	4	APLN/ITGB3/PROK2/THBS1
GO:0032369	negative regulation of lipid transport	2/114	47/18903	0.0326741	0.10441	0.0720883	2	ITGB3/THBS1
GO:0045646	regulation of erythrocyte differentiation	2/114	47/18903	0.0326741	0.10441	0.0720883	2	INHBA/ZFP36
GO:0050919	negative chemotaxis	2/114	47/18903	0.0326741	0.10441	0.0720883	2	ITGB3/SEMA3B
GO:0051180	vitamin transport	2/114	47/18903	0.0326741	0.10441	0.0720883	2	FOLR3/SLC2A3
GO:0061383	trabecula morphogenesis	2/114	47/18903	0.0326741	0.10441	0.0720883	2	NOG/TGFB2
GO:0071470	cellular response to osmotic stress	2/114	47/18903	0.0326741	0.10441	0.0720883	2	NLRP3/PTGS2
GO:0097028	dendritic cell differentiation	2/114	47/18903	0.0326741	0.10441	0.0720883	2	CEBPB/CSF2
GO:1900368	regulation of post-transcriptional gene silencing by RNA	2/114	47/18903	0.0326741	0.10441	0.0720883	2	IL6/ZFP36
GO:1902895	positive regulation of miRNA transcription	2/114	47/18903	0.0326741	0.10441	0.0720883	2	APLN/TGFB2
GO:0051222	positive regulation of protein transport	5/114	294/18903	0.032811	0.104723	0.0723048	5	FGA/HCAR2/IL1B/PTGS2/TGFB2
GO:0051702	biological process involved in interaction with symbiont	3/114	116/18903	0.0331265	0.105605	0.0729137	3	FN1/PTX3/TREM1
GO:0001666	response to hypoxia	5/114	296/18903	0.0336357	0.106882	0.073795	5	ADM/EDN1/PTGS2/TGFB2/THBS1
GO:0048872	homeostasis of number of cells	5/114	296/18903	0.0336357	0.106882	0.073795	5	HCAR2/IL6/INHBA/PDE4B/ZFP36
GO:0043406	positive regulation of MAP kinase activity	3/114	117/18903	0.0338531	0.106882	0.073795	3	EDN1/IL1B/THBS1
GO:0006195	purine nucleotide catabolic process	2/114	48/18903	0.0339628	0.106882	0.073795	2	NT5E/PDE4B
GO:0031641	regulation of myelination	2/114	48/18903	0.0339628	0.106882	0.073795	2	ITGAX/TG
GO:0032620	interleukin-17 production	2/114	48/18903	0.0339628	0.106882	0.073795	2	IL6/OSM
GO:0032660	regulation of interleukin-17 production	2/114	48/18903	0.0339628	0.106882	0.073795	2	IL6/OSM
GO:0032892	positive regulation of organic acid transport	2/114	48/18903	0.0339628	0.106882	0.073795	2	EDN1/IL1B
GO:0032924	activin receptor signaling pathway	2/114	48/18903	0.0339628	0.106882	0.073795	2	FSTL3/INHBA
GO:0046850	regulation of bone remodeling	2/114	48/18903	0.0339628	0.106882	0.073795	2	IL6/ITGB3
GO:0060147	regulation of post-transcriptional gene silencing	2/114	48/18903	0.0339628	0.106882	0.073795	2	IL6/ZFP36
GO:0098739	import across plasma membrane	4/114	202/18903	0.0340436	0.107011	0.0738844	4	SLC22A4/SLC2A3/SLC7A2/THBS1
GO:0097193	intrinsic apoptotic signaling pathway	5/114	298/18903	0.0344733	0.108236	0.0747299	5	BCL2A1/CEBPB/PLAUR/PTGS2/SNAI1
GO:0002286	T cell activation involved in immune response	3/114	118/18903	0.034588	0.108343	0.0748042	3	IL6/NLRP3/SLC11A1
GO:0071346	cellular response to interferon-gamma	3/114	118/18903	0.034588	0.108343	0.0748042	3	CCL20/CCL3L1/EDN1
GO:1901888	regulation of cell junction assembly	4/114	204/18903	0.0351048	0.109835	0.0758339	4	AMIGO2/IL1B/SNAI1/THBS1
GO:0009261	ribonucleotide catabolic process	2/114	49/18903	0.0352712	0.109846	0.0758414	2	NT5E/PDE4B
GO:0019884	antigen processing and presentation of exogenous antigen	2/114	49/18903	0.0352712	0.109846	0.0758414	2	CTSE/HLA-DRB4
GO:0048066	developmental pigmentation	2/114	49/18903	0.0352712	0.109846	0.0758414	2	ADAMTSL4/RAB32
GO:2000404	regulation of T cell migration	2/114	49/18903	0.0352712	0.109846	0.0758414	2	CCL20/ITGB3
GO:0007204	positive regulation of cytosolic calcium ion concentration	4/114	205/18903	0.0356425	0.110874	0.0765515	4	ADM/EDN1/FPR2/PROK2
GO:0007613	memory	3/114	120/18903	0.0360824	0.112113	0.077407	3	CEBPB/ITGA5/PTGS2
GO:0043588	skin development	5/114	302/18903	0.0361872	0.11231	0.0775425	5	EREG/INHBA/SNAI1/TGFB2/ZFP36
GO:0042304	regulation of fatty acid biosynthetic process	2/114	50/18903	0.0365989	0.113196	0.0781547	2	IL1B/PTGS2
GO:0060966	regulation of gene silencing by RNA	2/114	50/18903	0.0365989	0.113196	0.0781547	2	IL6/ZFP36
GO:0089718	amino acid import across plasma membrane	2/114	50/18903	0.0365989	0.113196	0.0781547	2	SLC22A4/SLC7A2
GO:0019722	calcium-mediated signaling	4/114	208/18903	0.0372844	0.115185	0.0795275	4	CCL20/CXCL8/EDN1/FPR2
GO:0046651	lymphocyte proliferation	5/114	305/18903	0.0375067	0.115739	0.0799101	5	CEBPB/IL1B/IL4I1/IL6/SLC11A1
GO:0030278	regulation of ossification	3/114	122/18903	0.0376098	0.115792	0.0799468	3	CCN1/SRGN/TGFB2
GO:0071901	negative regulation of protein serine/threonine kinase activity	3/114	122/18903	0.0376098	0.115792	0.0799468	3	DUSP1/IL1B/PKIB
GO:0030100	regulation of endocytosis	4/114	209/18903	0.0378413	0.116031	0.0801119	4	APLN/ITGB3/SERPINE1/VTN
GO:0007157	heterophilic cell-cell adhesion via plasma membrane cell adhesion molecules	2/114	51/18903	0.0379456	0.116031	0.0801119	2	AMIGO2/ITGA5
GO:0030225	macrophage differentiation	2/114	51/18903	0.0379456	0.116031	0.0801119	2	CSF2/INHBA
GO:0032692	negative regulation of interleukin-1 production	2/114	51/18903	0.0379456	0.116031	0.0801119	2	MEFV/NLRP3
GO:0043277	apoptotic cell clearance	2/114	51/18903	0.0379456	0.116031	0.0801119	2	ITGB3/THBS1
GO:0060688	regulation of morphogenesis of a branching structure	2/114	51/18903	0.0379456	0.116031	0.0801119	2	NOG/NTN4
GO:0030203	glycosaminoglycan metabolic process	3/114	123/18903	0.0383858	0.117244	0.0809494	3	HAS1/IL1B/TNFAIP6
GO:0072676	lymphocyte migration	3/114	124/18903	0.0391699	0.119504	0.0825096	3	CCL20/CCL3L1/ITGB3
GO:0036293	response to decreased oxygen levels	5/114	309/18903	0.0393116	0.1198	0.0827145	5	ADM/EDN1/PTGS2/TGFB2/THBS1
GO:1904951	positive regulation of establishment of protein localization	5/114	310/18903	0.039771	0.121064	0.0835867	5	FGA/HCAR2/IL1B/PTGS2/TGFB2
GO:0001952	regulation of cell-matrix adhesion	3/114	125/18903	0.0399622	0.121372	0.0837993	3	ITGB3/SERPINE1/THBS1
GO:0003014	renal system process	3/114	125/18903	0.0399622	0.121372	0.0837993	3	ADM/EDN1/HBB
GO:0052372	modulation by symbiont of entry into host	2/114	53/18903	0.0406951	0.123109	0.0849991	2	CXCL8/PTX3
GO:0032943	mononuclear cell proliferation	5/114	312/18903	0.0406996	0.123109	0.0849991	5	CEBPB/IL1B/IL4I1/IL6/SLC11A1
GO:0003206	cardiac chamber morphogenesis	3/114	126/18903	0.0407626	0.123109	0.0849991	3	CCN1/NOG/TGFB2
GO:0003231	cardiac ventricle development	3/114	126/18903	0.0407626	0.123109	0.0849991	3	CCN1/NOG/TGFB2
GO:0006690	icosanoid metabolic process	3/114	126/18903	0.0407626	0.123109	0.0849991	3	EDN1/IL1B/PTGS2
GO:0001838	embryonic epithelial tube formation	3/114	127/18903	0.0415711	0.125411	0.0865881	3	ADM/NOG/TGFB2
GO:0050890	cognition	5/114	314/18903	0.0416414	0.125483	0.0866376	5	CEBPB/ITGA5/MME/NOG/PTGS2
GO:0006469	negative regulation of protein kinase activity	4/114	216/18903	0.0418734	0.126041	0.0870231	4	DUSP1/FABP4/IL1B/PKIB
GO:0010883	regulation of lipid storage	2/114	54/18903	0.0420973	0.126152	0.0870996	2	IL6/ITGB3
GO:0045778	positive regulation of ossification	2/114	54/18903	0.0420973	0.126152	0.0870996	2	CCN1/TGFB2
GO:0061900	glial cell activation	2/114	54/18903	0.0420973	0.126152	0.0870996	2	IL1B/IL6
GO:0072523	purine-containing compound catabolic process	2/114	54/18903	0.0420973	0.126152	0.0870996	2	NT5E/PDE4B
GO:0016032	viral process	6/114	421/18903	0.04225	0.126469	0.0873184	6	ANPEP/CXCL8/ITGA5/ITGB3/PTX3/ZFP36
GO:0007281	germ cell development	5/114	316/18903	0.0425963	0.127364	0.0879366	5	EDN1/EREG/PIWIL2/PTX3/TNFAIP6
GO:0050714	positive regulation of protein secretion	3/114	129/18903	0.0432123	0.12892	0.0890109	3	FGA/HCAR2/TGFB2
GO:2000027	regulation of animal organ morphogenesis	3/114	129/18903	0.0432123	0.12892	0.0890109	3	EDN1/NOG/NTN4
GO:0002686	negative regulation of leukocyte migration	2/114	55/18903	0.0435175	0.129116	0.0891465	2	DUSP1/TNFAIP6
GO:0003229	ventricular cardiac muscle tissue development	2/114	55/18903	0.0435175	0.129116	0.0891465	2	NOG/TGFB2
GO:0070169	positive regulation of biomineral tissue development	2/114	55/18903	0.0435175	0.129116	0.0891465	2	CCN1/CEBPB
GO:0071385	cellular response to glucocorticoid stimulus	2/114	55/18903	0.0435175	0.129116	0.0891465	2	EDN1/ZFP36
GO:1904645	response to amyloid-beta	2/114	55/18903	0.0435175	0.129116	0.0891465	2	FPR2/MMP3
GO:0032612	interleukin-1 production	3/114	130/18903	0.044045	0.130276	0.0899475	3	IL6/MEFV/NLRP3
GO:0032652	regulation of interleukin-1 production	3/114	130/18903	0.044045	0.130276	0.0899475	3	IL6/MEFV/NLRP3
GO:0019058	viral life cycle	5/114	319/18903	0.0440534	0.130276	0.0899475	5	ANPEP/CXCL8/ITGA5/ITGB3/PTX3
GO:0110151	positive regulation of biomineralization	2/114	56/18903	0.0449554	0.132653	0.0915883	2	CCN1/CEBPB
GO:2000630	positive regulation of miRNA metabolic process	2/114	56/18903	0.0449554	0.132653	0.0915883	2	APLN/TGFB2
GO:0009416	response to light stimulus	5/114	321/18903	0.0450414	0.132761	0.0916632	5	MME/MMP3/NOG/PTGS2/TIMP1
GO:0034655	nucleobase-containing compound catabolic process	6/114	428/18903	0.0451491	0.132933	0.091782	6	IGF2BP1/IL6/NT5E/PDE4B/SLC11A1/ZFP36
GO:0031331	positive regulation of cellular catabolic process	6/114	429/18903	0.0455732	0.134036	0.0925431	6	IGF2BP1/IL1B/IL6/MEFV/SLC4A4/ZFP36
GO:1903053	regulation of extracellular matrix organization	2/114	57/18903	0.0464108	0.136351	0.0941413	2	IL6/ITGB3
GO:0002702	positive regulation of production of molecular mediator of immune response	3/114	133/18903	0.0465909	0.136731	0.094404	3	IL1B/IL6/NLRP3
GO:0006022	aminoglycan metabolic process	3/114	134/18903	0.0474555	0.139117	0.0960512	3	HAS1/IL1B/TNFAIP6
GO:0033619	membrane protein proteolysis	2/114	58/18903	0.0478833	0.140066	0.0967069	2	IL1B/TIMP1
GO:0048599	oocyte development	2/114	58/18903	0.0478833	0.140066	0.0967069	2	EDN1/EREG
GO:2001235	positive regulation of apoptotic signaling pathway	3/114	135/18903	0.048328	0.141214	0.0974992	3	G0S2/INHBA/THBS1
GO:0010565	regulation of cellular ketone metabolic process	3/114	136/18903	0.0492083	0.143631	0.0991678	3	ADM/IL1B/PTGS2
GO:0002090	regulation of receptor internalization	2/114	59/18903	0.0493728	0.1438	0.0992843	2	APLN/ITGB3
GO:0033363	secretory granule organization	2/114	59/18903	0.0493728	0.1438	0.0992843	2	PTPRN/SRGN
GO:0048588	developmental cell growth	4/114	229/18903	0.049984	0.145266	0.100297	4	EDN1/FN1/L1CAM/SEMA3B
GO:0071241	cellular response to inorganic substance	4/114	229/18903	0.049984	0.145266	0.100297	4	EDN1/FABP4/MMP3/PTGS2
GO:0010594	regulation of endothelial cell migration	4/114	230/18903	0.0506414	0.147018	0.101506	4	EDN1/ITGB3/PTGS2/THBS1
GO:0043407	negative regulation of MAP kinase activity	2/114	60/18903	0.0508789	0.147074	0.101545	2	DUSP1/IL1B
GO:0051353	positive regulation of oxidoreductase activity	2/114	60/18903	0.0508789	0.147074	0.101545	2	EDN1/IL1B
GO:0055008	cardiac muscle tissue morphogenesis	2/114	60/18903	0.0508789	0.147074	0.101545	2	NOG/TGFB2
GO:1903670	regulation of sprouting angiogenesis	2/114	60/18903	0.0508789	0.147074	0.101545	2	ITGA5/THBS1
GO:0030879	mammary gland development	3/114	138/18903	0.0509926	0.147245	0.101663	3	APLN/AREG/CEBPB
GO:0072175	epithelial tube formation	3/114	139/18903	0.0518964	0.149695	0.103355	3	ADM/NOG/TGFB2
GO:1900024	regulation of substrate adhesion-dependent cell spreading	2/114	61/18903	0.0524015	0.150829	0.104138	2	FGA/ITGB3
GO:1902893	regulation of miRNA transcription	2/114	61/18903	0.0524015	0.150829	0.104138	2	APLN/TGFB2
GO:0009743	response to carbohydrate	4/114	234/18903	0.0533183	0.153295	0.10584	4	IL1B/PTGS2/PTPRN/THBS1
GO:0070482	response to oxygen levels	5/114	337/18903	0.0534227	0.153295	0.10584	5	ADM/EDN1/PTGS2/TGFB2/THBS1
GO:0001889	liver development	3/114	141/18903	0.0537274	0.153295	0.10584	3	CEBPB/IL6/VTN
GO:0006767	water-soluble vitamin metabolic process	2/114	62/18903	0.0539402	0.153295	0.10584	2	NNMT/SLC2A3
GO:0009994	oocyte differentiation	2/114	62/18903	0.0539402	0.153295	0.10584	2	EDN1/EREG
GO:0022617	extracellular matrix disassembly	2/114	62/18903	0.0539402	0.153295	0.10584	2	IL6/MMP3
GO:0043030	regulation of macrophage activation	2/114	62/18903	0.0539402	0.153295	0.10584	2	IL6/THBS1
GO:0046824	positive regulation of nucleocytoplasmic transport	2/114	62/18903	0.0539402	0.153295	0.10584	2	IL1B/PTGS2
GO:0060038	cardiac muscle cell proliferation	2/114	62/18903	0.0539402	0.153295	0.10584	2	NOG/TGFB2
GO:0061614	miRNA transcription	2/114	62/18903	0.0539402	0.153295	0.10584	2	APLN/TGFB2
GO:1903018	regulation of glycoprotein metabolic process	2/114	62/18903	0.0539402	0.153295	0.10584	2	HBEGF/PTX3
GO:1904036	negative regulation of epithelial cell apoptotic process	2/114	62/18903	0.0539402	0.153295	0.10584	2	FGA/SERPINE1
GO:0050804	modulation of chemical synaptic transmission	6/114	448/18903	0.0541073	0.153608	0.106056	6	EDN1/IL1B/MME/NOG/PTGS2/SYN1
GO:0099177	regulation of trans-synaptic signaling	6/114	449/18903	0.0545817	0.154792	0.106874	6	EDN1/IL1B/MME/NOG/PTGS2/SYN1
GO:0007411	axon guidance	4/114	236/18903	0.0546853	0.154923	0.106964	4	EDN1/L1CAM/NOG/SEMA3B
GO:0002696	positive regulation of leukocyte activation	6/114	450/18903	0.0550586	0.155816	0.107581	6	HLA-DRB4/IL1B/IL4I1/IL6/NLRP3/THBS1
GO:0097485	neuron projection guidance	4/114	237/18903	0.0553759	0.155846	0.107602	4	EDN1/L1CAM/NOG/SEMA3B
GO:0019731	antibacterial humoral response	2/114	63/18903	0.0554949	0.155846	0.107602	2	BPIFA1/FGA
GO:0032615	interleukin-12 production	2/114	63/18903	0.0554949	0.155846	0.107602	2	MEFV/THBS1
GO:0032655	regulation of interleukin-12 production	2/114	63/18903	0.0554949	0.155846	0.107602	2	MEFV/THBS1
GO:0045453	bone resorption	2/114	63/18903	0.0554949	0.155846	0.107602	2	IL6/ITGB3
GO:0050994	regulation of lipid catabolic process	2/114	63/18903	0.0554949	0.155846	0.107602	2	HCAR2/IL1B
GO:0070542	response to fatty acid	2/114	63/18903	0.0554949	0.155846	0.107602	2	EDN1/PTGS2
GO:1903829	positive regulation of protein localization	6/114	451/18903	0.055538	0.155846	0.107602	6	FGA/HCAR2/IL1B/PTGS2/TGFB2/TNFAIP6
GO:2001056	positive regulation of cysteine-type endopeptidase activity	3/114	143/18903	0.0555891	0.155846	0.107602	3	CCN1/MEFV/NLRP3
GO:0009314	response to radiation	6/114	452/18903	0.05602	0.156775	0.108243	6	ITGB3/MME/MMP3/NOG/PTGS2/TIMP1
GO:0061008	hepaticobiliary system development	3/114	144/18903	0.0565315	0.156775	0.108243	3	CEBPB/IL6/VTN
GO:0050670	regulation of lymphocyte proliferation	4/114	239/18903	0.0567713	0.156775	0.108243	4	CEBPB/IL1B/IL4I1/IL6
GO:0051403	stress-activated MAPK cascade	4/114	239/18903	0.0567713	0.156775	0.108243	4	DUSP1/IL1B/TGFB2/ZFP36
GO:0030199	collagen fibril organization	2/114	64/18903	0.0570652	0.156775	0.108243	2	ADAMTS3/TGFB2
GO:0050918	positive chemotaxis	2/114	64/18903	0.0570652	0.156775	0.108243	2	CXCL8/FPR2
GO:0051445	regulation of meiotic cell cycle	2/114	64/18903	0.0570652	0.156775	0.108243	2	DUSP1/PIWIL2
GO:0071384	cellular response to corticosteroid stimulus	2/114	64/18903	0.0570652	0.156775	0.108243	2	EDN1/ZFP36
GO:0033673	negative regulation of kinase activity	4/114	240/18903	0.0574761	0.156775	0.108243	4	DUSP1/FABP4/IL1B/PKIB
GO:0062197	cellular response to chemical stress	5/114	345/18903	0.0579329	0.156775	0.108243	5	EDN1/IL6/MMP3/NLRP3/PTGS2
GO:0042445	hormone metabolic process	4/114	241/18903	0.0581855	0.156775	0.108243	4	ADM/IL4I1/MME/TG
GO:0048247	lymphocyte chemotaxis	2/114	65/18903	0.058651	0.156775	0.108243	2	CCL20/CCL3L1
GO:0003253	cardiac neural crest cell migration involved in outflow tract morphogenesis	1/114	10/18903	0.0587109	0.156775	0.108243	1	EDN1
GO:0009128	purine nucleoside monophosphate catabolic process	1/114	10/18903	0.0587109	0.156775	0.108243	1	NT5E
GO:0009169	purine ribonucleoside monophosphate catabolic process	1/114	10/18903	0.0587109	0.156775	0.108243	1	NT5E
GO:0010764	negative regulation of fibroblast migration	1/114	10/18903	0.0587109	0.156775	0.108243	1	HAS1
GO:0014824	artery smooth muscle contraction	1/114	10/18903	0.0587109	0.156775	0.108243	1	EDN1
GO:0015838	amino-acid betaine transport	1/114	10/18903	0.0587109	0.156775	0.108243	1	SLC22A4
GO:0015851	nucleobase transport	1/114	10/18903	0.0587109	0.156775	0.108243	1	AQP9
GO:0015911	long-chain fatty acid import across plasma membrane	1/114	10/18903	0.0587109	0.156775	0.108243	1	THBS1
GO:0030223	neutrophil differentiation	1/114	10/18903	0.0587109	0.156775	0.108243	1	CSF2
GO:0033034	positive regulation of myeloid cell apoptotic process	1/114	10/18903	0.0587109	0.156775	0.108243	1	HCAR2
GO:0034356	NAD biosynthesis via nicotinamide riboside salvage pathway	1/114	10/18903	0.0587109	0.156775	0.108243	1	NNMT
GO:0035646	endosome to melanosome transport	1/114	10/18903	0.0587109	0.156775	0.108243	1	RAB32
GO:0035860	glial cell-derived neurotrophic factor receptor signaling pathway	1/114	10/18903	0.0587109	0.156775	0.108243	1	GDF15
GO:0042368	vitamin D biosynthetic process	1/114	10/18903	0.0587109	0.156775	0.108243	1	SNAI1
GO:0043485	endosome to pigment granule transport	1/114	10/18903	0.0587109	0.156775	0.108243	1	RAB32
GO:0044341	sodium-dependent phosphate transport	1/114	10/18903	0.0587109	0.156775	0.108243	1	CEBPB
GO:0046085	adenosine metabolic process	1/114	10/18903	0.0587109	0.156775	0.108243	1	NT5E
GO:0046886	positive regulation of hormone biosynthetic process	1/114	10/18903	0.0587109	0.156775	0.108243	1	ADM
GO:0048757	pigment granule maturation	1/114	10/18903	0.0587109	0.156775	0.108243	1	RAB32
GO:0048865	stem cell fate commitment	1/114	10/18903	0.0587109	0.156775	0.108243	1	EDN1
GO:0051409	response to nitrosative stress	1/114	10/18903	0.0587109	0.156775	0.108243	1	DUSP6
GO:0060296	regulation of cilium beat frequency involved in ciliary motility	1/114	10/18903	0.0587109	0.156775	0.108243	1	CATSPER1
GO:0060536	cartilage morphogenesis	1/114	10/18903	0.0587109	0.156775	0.108243	1	SNAI1
GO:0070091	glucagon secretion	1/114	10/18903	0.0587109	0.156775	0.108243	1	IL6
GO:0070092	regulation of glucagon secretion	1/114	10/18903	0.0587109	0.156775	0.108243	1	IL6
GO:0070099	regulation of chemokine-mediated signaling pathway	1/114	10/18903	0.0587109	0.156775	0.108243	1	EDN1
GO:0070294	renal sodium ion absorption	1/114	10/18903	0.0587109	0.156775	0.108243	1	EDN1
GO:0071421	manganese ion transmembrane transport	1/114	10/18903	0.0587109	0.156775	0.108243	1	SLC11A1
GO:0071918	urea transmembrane transport	1/114	10/18903	0.0587109	0.156775	0.108243	1	AQP9
GO:0072172	mesonephric tubule formation	1/114	10/18903	0.0587109	0.156775	0.108243	1	NOG
GO:0097050	type B pancreatic cell apoptotic process	1/114	10/18903	0.0587109	0.156775	0.108243	1	IL6
GO:0140059	dendrite arborization	1/114	10/18903	0.0587109	0.156775	0.108243	1	IGF2BP1
GO:1900003	regulation of serine-type endopeptidase activity	1/114	10/18903	0.0587109	0.156775	0.108243	1	SPINK6
GO:1902571	regulation of serine-type peptidase activity	1/114	10/18903	0.0587109	0.156775	0.108243	1	SPINK6
GO:1903596	regulation of gap junction assembly	1/114	10/18903	0.0587109	0.156775	0.108243	1	IL1B
GO:2000659	regulation of interleukin-1-mediated signaling pathway	1/114	10/18903	0.0587109	0.156775	0.108243	1	IL6
GO:0006865	amino acid transport	3/114	147/18903	0.0594043	0.158001	0.10909	3	SLC11A1/SLC22A4/SLC7A2
GO:0051592	response to calcium ion	3/114	147/18903	0.0594043	0.158001	0.10909	3	EDN1/FGA/THBS1
GO:0106106	cold-induced thermogenesis	3/114	147/18903	0.0594043	0.158001	0.10909	3	CEBPB/FABP4/G0S2
GO:0120161	regulation of cold-induced thermogenesis	3/114	147/18903	0.0594043	0.158001	0.10909	3	CEBPB/FABP4/G0S2
GO:0032944	regulation of mononuclear cell proliferation	4/114	243/18903	0.0596186	0.158415	0.109376	4	CEBPB/IL1B/IL4I1/IL6
GO:0010812	negative regulation of cell-substrate adhesion	2/114	66/18903	0.060252	0.159783	0.11032	2	SERPINE1/THBS1
GO:0034605	cellular response to heat	2/114	66/18903	0.060252	0.159783	0.11032	2	PTGS2/THBS1
GO:0042113	B cell activation	5/114	350/18903	0.0608601	0.161237	0.111324	5	ADGRG3/IL11/IL4I1/IL6/INHBA
GO:0016525	negative regulation of angiogenesis	3/114	149/18903	0.0613571	0.162235	0.112013	3	SERPINE1/TGFB2/THBS1
GO:2000377	regulation of reactive oxygen species metabolic process	3/114	149/18903	0.0613571	0.162235	0.112013	3	FPR2/MMP3/THBS1
GO:0031098	stress-activated protein kinase signaling cascade	4/114	246/18903	0.0618035	0.163106	0.112615	4	DUSP1/IL1B/TGFB2/ZFP36
GO:0015909	long-chain fatty acid transport	2/114	67/18903	0.061868	0.163106	0.112615	2	FABP4/THBS1
GO:1901224	positive regulation of NIK/NF-kappaB signaling	2/114	67/18903	0.061868	0.163106	0.112615	2	EDN1/IL1B
GO:2000181	negative regulation of blood vessel morphogenesis	3/114	151/18903	0.0633397	0.164141	0.113329	3	SERPINE1/TGFB2/THBS1
GO:0000288	nuclear-transcribed mRNA catabolic process, deadenylation-dependent decay	2/114	68/18903	0.0634987	0.164141	0.113329	2	IGF2BP1/ZFP36
GO:0042093	T-helper cell differentiation	2/114	68/18903	0.0634987	0.164141	0.113329	2	IL6/NLRP3
GO:0042446	hormone biosynthetic process	2/114	68/18903	0.0634987	0.164141	0.113329	2	ADM/TG
GO:0050867	positive regulation of cell activation	6/114	467/18903	0.0635551	0.164141	0.113329	6	HLA-DRB4/IL1B/IL4I1/IL6/NLRP3/THBS1
GO:1901343	negative regulation of vasculature development	3/114	152/18903	0.0643421	0.164141	0.113329	3	SERPINE1/TGFB2/THBS1
GO:0003357	noradrenergic neuron differentiation	1/114	11/18903	0.0643906	0.164141	0.113329	1	EDN1
GO:0006568	tryptophan metabolic process	1/114	11/18903	0.0643906	0.164141	0.113329	1	IL4I1
GO:0014820	tonic smooth muscle contraction	1/114	11/18903	0.0643906	0.164141	0.113329	1	EDN1
GO:0015840	urea transport	1/114	11/18903	0.0643906	0.164141	0.113329	1	AQP9
GO:0032276	regulation of gonadotropin secretion	1/114	11/18903	0.0643906	0.164141	0.113329	1	INHBA
GO:0038003	G protein-coupled opioid receptor signaling pathway	1/114	11/18903	0.0643906	0.164141	0.113329	1	ITGB3
GO:0042451	purine nucleoside biosynthetic process	1/114	11/18903	0.0643906	0.164141	0.113329	1	NT5E
GO:0042455	ribonucleoside biosynthetic process	1/114	11/18903	0.0643906	0.164141	0.113329	1	NT5E
GO:0044848	biological phase	1/114	11/18903	0.0643906	0.164141	0.113329	1	TGFB2
GO:0045628	regulation of T-helper 2 cell differentiation	1/114	11/18903	0.0643906	0.164141	0.113329	1	NLRP3
GO:0045793	positive regulation of cell size	1/114	11/18903	0.0643906	0.164141	0.113329	1	EDN1
GO:0046129	purine ribonucleoside biosynthetic process	1/114	11/18903	0.0643906	0.164141	0.113329	1	NT5E
GO:0051610	serotonin uptake	1/114	11/18903	0.0643906	0.164141	0.113329	1	ITGB3
GO:0060272	embryonic skeletal joint morphogenesis	1/114	11/18903	0.0643906	0.164141	0.113329	1	NOG
GO:0060601	lateral sprouting from an epithelium	1/114	11/18903	0.0643906	0.164141	0.113329	1	NOG
GO:0061314	Notch signaling involved in heart development	1/114	11/18903	0.0643906	0.164141	0.113329	1	SNAI1
GO:0070934	CRD-mediated mRNA stabilization	1/114	11/18903	0.0643906	0.164141	0.113329	1	IGF2BP1
GO:0070944	neutrophil-mediated killing of bacterium	1/114	11/18903	0.0643906	0.164141	0.113329	1	TREM1
GO:0071803	positive regulation of podosome assembly	1/114	11/18903	0.0643906	0.164141	0.113329	1	CSF2
GO:0071872	cellular response to epinephrine stimulus	1/114	11/18903	0.0643906	0.164141	0.113329	1	PDE4B
GO:0072124	regulation of glomerular mesangial cell proliferation	1/114	11/18903	0.0643906	0.164141	0.113329	1	ITGB3
GO:0086100	endothelin receptor signaling pathway	1/114	11/18903	0.0643906	0.164141	0.113329	1	EDN1
GO:0090184	positive regulation of kidney development	1/114	11/18903	0.0643906	0.164141	0.113329	1	NOG
GO:0106049	regulation of cellular response to osmotic stress	1/114	11/18903	0.0643906	0.164141	0.113329	1	PTGS2
GO:1901731	positive regulation of platelet aggregation	1/114	11/18903	0.0643906	0.164141	0.113329	1	IL6
GO:1902510	regulation of apoptotic DNA fragmentation	1/114	11/18903	0.0643906	0.164141	0.113329	1	IL6
GO:1990440	positive regulation of transcription from RNA polymerase II promoter in response to endoplasmic reticulum stress	1/114	11/18903	0.0643906	0.164141	0.113329	1	CEBPB
GO:2000480	negative regulation of cAMP-dependent protein kinase activity	1/114	11/18903	0.0643906	0.164141	0.113329	1	PKIB
GO:2001241	positive regulation of extrinsic apoptotic signaling pathway in absence of ligand	1/114	11/18903	0.0643906	0.164141	0.113329	1	INHBA
GO:0072507	divalent inorganic cation homeostasis	5/114	356/18903	0.0644824	0.16422	0.113383	5	ADM/EDN1/ITGB3/NT5E/SLC11A1
GO:0009636	response to toxic substance	4/114	250/18903	0.064782	0.164672	0.113696	4	HBA1/HBA2/HBB/PTGS2
GO:0071695	anatomical structure maturation	4/114	250/18903	0.064782	0.164672	0.113696	4	EDN1/EREG/NTN4/TGFB2
GO:0014015	positive regulation of gliogenesis	2/114	69/18903	0.0651439	0.164815	0.113794	2	IL1B/IL6
GO:0032835	glomerulus development	2/114	69/18903	0.0651439	0.164815	0.113794	2	ITGB3/NOG
GO:0055021	regulation of cardiac muscle tissue growth	2/114	69/18903	0.0651439	0.164815	0.113794	2	EDN1/NOG
GO:0061180	mammary gland epithelium development	2/114	69/18903	0.0651439	0.164815	0.113794	2	AREG/CEBPB
GO:2000401	regulation of lymphocyte migration	2/114	69/18903	0.0651439	0.164815	0.113794	2	CCL20/ITGB3
GO:0016331	morphogenesis of embryonic epithelium	3/114	153/18903	0.0653519	0.165187	0.114051	3	ADM/NOG/TGFB2
GO:0002294	CD4-positive, alpha-beta T cell differentiation involved in immune response	2/114	70/18903	0.0668033	0.168382	0.116257	2	IL6/NLRP3
GO:0032722	positive regulation of chemokine production	2/114	70/18903	0.0668033	0.168382	0.116257	2	IL1B/IL6
GO:0042130	negative regulation of T cell proliferation	2/114	70/18903	0.0668033	0.168382	0.116257	2	CEBPB/IL4I1
GO:0010038	response to metal ion	5/114	360/18903	0.0669636	0.168628	0.116427	5	EDN1/FABP4/FGA/PTGS2/THBS1
GO:0035148	tube formation	3/114	155/18903	0.0673934	0.16865	0.116442	3	ADM/NOG/TGFB2
GO:0008544	epidermis development	5/114	362/18903	0.0682241	0.16865	0.116442	5	EREG/INHBA/SNAI1/TGFB2/ZFP36
GO:0045787	positive regulation of cell cycle	5/114	362/18903	0.0682241	0.16865	0.116442	5	EDN1/EREG/IL1B/PIWIL2/TGFB2
GO:0050770	regulation of axonogenesis	3/114	156/18903	0.068425	0.16865	0.116442	3	FN1/L1CAM/SEMA3B
GO:0002287	alpha-beta T cell activation involved in immune response	2/114	71/18903	0.0684768	0.16865	0.116442	2	IL6/NLRP3
GO:0002293	alpha-beta T cell differentiation involved in immune response	2/114	71/18903	0.0684768	0.16865	0.116442	2	IL6/NLRP3
GO:0003208	cardiac ventricle morphogenesis	2/114	71/18903	0.0684768	0.16865	0.116442	2	NOG/TGFB2
GO:2000379	positive regulation of reactive oxygen species metabolic process	2/114	71/18903	0.0684768	0.16865	0.116442	2	FPR2/THBS1
GO:0006814	sodium ion transport	4/114	255/18903	0.0686096	0.16865	0.116442	4	BPIFA1/EDN1/SLC22A4/SLC4A4
GO:0090257	regulation of muscle system process	4/114	256/18903	0.0693889	0.16865	0.116442	4	EDN1/PDE4B/PROK2/PTGS2
GO:0007189	adenylate cyclase-activating G protein-coupled receptor signaling pathway	3/114	157/18903	0.0694638	0.16865	0.116442	3	ADGRG3/ADM/PDE4B
GO:0048754	branching morphogenesis of an epithelial tube	3/114	157/18903	0.0694638	0.16865	0.116442	3	AREG/EDN1/NOG
GO:0002424	T cell mediated immune response to tumor cell	1/114	12/18903	0.0700363	0.16865	0.116442	1	IL4I1
GO:0002674	negative regulation of acute inflammatory response	1/114	12/18903	0.0700363	0.16865	0.116442	1	NLRP3
GO:0008298	intracellular mRNA localization	1/114	12/18903	0.0700363	0.16865	0.116442	1	ZFP36
GO:0009134	nucleoside diphosphate catabolic process	1/114	12/18903	0.0700363	0.16865	0.116442	1	NT5E
GO:0010749	regulation of nitric oxide mediated signal transduction	1/114	12/18903	0.0700363	0.16865	0.116442	1	THBS1
GO:0010936	negative regulation of macrophage cytokine production	1/114	12/18903	0.0700363	0.16865	0.116442	1	TGFB2
GO:0015791	polyol transmembrane transport	1/114	12/18903	0.0700363	0.16865	0.116442	1	AQP9
GO:0030656	regulation of vitamin metabolic process	1/114	12/18903	0.0700363	0.16865	0.116442	1	SNAI1
GO:0032908	regulation of transforming growth factor beta1 production	1/114	12/18903	0.0700363	0.16865	0.116442	1	THBS1
GO:0032926	negative regulation of activin receptor signaling pathway	1/114	12/18903	0.0700363	0.16865	0.116442	1	FSTL3
GO:0032966	negative regulation of collagen biosynthetic process	1/114	12/18903	0.0700363	0.16865	0.116442	1	IL6
GO:0033083	regulation of immature T cell proliferation	1/114	12/18903	0.0700363	0.16865	0.116442	1	IL1B
GO:0033084	regulation of immature T cell proliferation in thymus	1/114	12/18903	0.0700363	0.16865	0.116442	1	IL1B
GO:0033629	negative regulation of cell adhesion mediated by integrin	1/114	12/18903	0.0700363	0.16865	0.116442	1	SERPINE1
GO:0035815	positive regulation of renal sodium excretion	1/114	12/18903	0.0700363	0.16865	0.116442	1	EDN1
GO:0040015	negative regulation of multicellular organism growth	1/114	12/18903	0.0700363	0.16865	0.116442	1	GDF15
GO:0042416	dopamine biosynthetic process	1/114	12/18903	0.0700363	0.16865	0.116442	1	TGFB2
GO:0042447	hormone catabolic process	1/114	12/18903	0.0700363	0.16865	0.116442	1	MME
GO:0042756	drinking behavior	1/114	12/18903	0.0700363	0.16865	0.116442	1	APLN
GO:0043476	pigment accumulation	1/114	12/18903	0.0700363	0.16865	0.116442	1	RAB32
GO:0043482	cellular pigment accumulation	1/114	12/18903	0.0700363	0.16865	0.116442	1	RAB32
GO:0048103	somatic stem cell division	1/114	12/18903	0.0700363	0.16865	0.116442	1	TGFB2
GO:0051549	positive regulation of keratinocyte migration	1/114	12/18903	0.0700363	0.16865	0.116442	1	HBEGF
GO:0051798	positive regulation of hair follicle development	1/114	12/18903	0.0700363	0.16865	0.116442	1	TGFB2
GO:0060394	negative regulation of pathway-restricted SMAD protein phosphorylation	1/114	12/18903	0.0700363	0.16865	0.116442	1	NOG
GO:0061309	cardiac neural crest cell development involved in outflow tract morphogenesis	1/114	12/18903	0.0700363	0.16865	0.116442	1	EDN1
GO:0070943	neutrophil-mediated killing of symbiont cell	1/114	12/18903	0.0700363	0.16865	0.116442	1	TREM1
GO:0071635	negative regulation of transforming growth factor beta production	1/114	12/18903	0.0700363	0.16865	0.116442	1	FN1
GO:0072110	glomerular mesangial cell proliferation	1/114	12/18903	0.0700363	0.16865	0.116442	1	ITGB3
GO:0097084	vascular associated smooth muscle cell development	1/114	12/18903	0.0700363	0.16865	0.116442	1	ADM
GO:0099149	regulation of postsynaptic neurotransmitter receptor internalization	1/114	12/18903	0.0700363	0.16865	0.116442	1	ITGB3
GO:0106072	negative regulation of adenylate cyclase-activating G protein-coupled receptor signaling pathway	1/114	12/18903	0.0700363	0.16865	0.116442	1	PDE4B
GO:1900152	negative regulation of nuclear-transcribed mRNA catabolic process, deadenylation-dependent decay	1/114	12/18903	0.0700363	0.16865	0.116442	1	IGF2BP1
GO:1902337	regulation of apoptotic process involved in morphogenesis	1/114	12/18903	0.0700363	0.16865	0.116442	1	TGFB2
GO:1903800	positive regulation of miRNA maturation	1/114	12/18903	0.0700363	0.16865	0.116442	1	IL6
GO:2000303	regulation of ceramide biosynthetic process	1/114	12/18903	0.0700363	0.16865	0.116442	1	CCN1
GO:2001214	positive regulation of vasculogenesis	1/114	12/18903	0.0700363	0.16865	0.116442	1	ADM
GO:0046626	regulation of insulin receptor signaling pathway	2/114	72/18903	0.0701641	0.168657	0.116446	2	IL1B/SOCS3
GO:1900076	regulation of cellular response to insulin stimulus	2/114	72/18903	0.0701641	0.168657	0.116446	2	IL1B/SOCS3
GO:0090101	negative regulation of transmembrane receptor protein serine/threonine kinase signaling pathway	3/114	158/18903	0.0705098	0.169337	0.116916	3	FSTL3/NOG/TNFAIP6
GO:0035051	cardiocyte differentiation	3/114	159/18903	0.071563	0.171674	0.11853	3	EDN1/INHBA/TGFB2
GO:0050805	negative regulation of synaptic transmission	2/114	73/18903	0.071865	0.171674	0.11853	2	IL1B/PTGS2
GO:0060415	muscle tissue morphogenesis	2/114	73/18903	0.071865	0.171674	0.11853	2	NOG/TGFB2
GO:0061035	regulation of cartilage development	2/114	73/18903	0.071865	0.171674	0.11853	2	CCN1/NOG
GO:0072678	T cell migration	2/114	73/18903	0.071865	0.171674	0.11853	2	CCL20/ITGB3
GO:1904888	cranial skeletal system development	2/114	73/18903	0.071865	0.171674	0.11853	2	NOG/TGFB2
GO:0090068	positive regulation of cell cycle process	4/114	260/18903	0.0725521	0.173162	0.119557	4	EDN1/EREG/IL1B/PIWIL2
GO:1990845	adaptive thermogenesis	3/114	160/18903	0.0726232	0.173178	0.119569	3	CEBPB/FABP4/G0S2
GO:0002699	positive regulation of immune effector process	4/114	261/18903	0.0733543	0.174767	0.120666	4	HLA-H/IL1B/IL6/NLRP3
GO:0006801	superoxide metabolic process	2/114	74/18903	0.0735793	0.174827	0.120707	2	EDN1/FPR2
GO:0051145	smooth muscle cell differentiation	2/114	74/18903	0.0735793	0.174827	0.120707	2	ADM/EREG
GO:2000628	regulation of miRNA metabolic process	2/114	74/18903	0.0735793	0.174827	0.120707	2	APLN/TGFB2
GO:0006417	regulation of translation	6/114	486/18903	0.0739226	0.174827	0.120707	6	C8orf88/IGF2BP1/IL6/PIWIL2/THBS1/ZFP36
GO:0045862	positive regulation of proteolysis	5/114	372/18903	0.0747242	0.174827	0.120707	5	CCN1/FN1/IL1B/MEFV/NLRP3
GO:0050792	regulation of viral process	3/114	162/18903	0.0747648	0.174827	0.120707	3	CXCL8/PTX3/ZFP36
GO:0043536	positive regulation of blood vessel endothelial cell migration	2/114	75/18903	0.0753067	0.174827	0.120707	2	PTGS2/THBS1
GO:0050810	regulation of steroid biosynthetic process	2/114	75/18903	0.0753067	0.174827	0.120707	2	ADM/SNAI1
GO:0002430	complement receptor mediated signaling pathway	1/114	13/18903	0.0756483	0.174827	0.120707	1	FPR2
GO:0003096	renal sodium ion transport	1/114	13/18903	0.0756483	0.174827	0.120707	1	EDN1
GO:0006586	indolalkylamine metabolic process	1/114	13/18903	0.0756483	0.174827	0.120707	1	IL4I1
GO:0009214	cyclic nucleotide catabolic process	1/114	13/18903	0.0756483	0.174827	0.120707	1	PDE4B
GO:0009437	carnitine metabolic process	1/114	13/18903	0.0756483	0.174827	0.120707	1	SLC22A4
GO:0010713	negative regulation of collagen metabolic process	1/114	13/18903	0.0756483	0.174827	0.120707	1	IL6
GO:0010745	negative regulation of macrophage derived foam cell differentiation	1/114	13/18903	0.0756483	0.174827	0.120707	1	ITGB3
GO:0032494	response to peptidoglycan	1/114	13/18903	0.0756483	0.174827	0.120707	1	IL6
GO:0033079	immature T cell proliferation	1/114	13/18903	0.0756483	0.174827	0.120707	1	IL1B
GO:0033080	immature T cell proliferation in thymus	1/114	13/18903	0.0756483	0.174827	0.120707	1	IL1B
GO:0035810	positive regulation of urine volume	1/114	13/18903	0.0756483	0.174827	0.120707	1	EDN1
GO:0042362	fat-soluble vitamin biosynthetic process	1/114	13/18903	0.0756483	0.174827	0.120707	1	SNAI1
GO:0042541	hemoglobin biosynthetic process	1/114	13/18903	0.0756483	0.174827	0.120707	1	INHBA
GO:0060213	positive regulation of nuclear-transcribed mRNA poly(A) tail shortening	1/114	13/18903	0.0756483	0.174827	0.120707	1	ZFP36
GO:0060707	trophoblast giant cell differentiation	1/114	13/18903	0.0756483	0.174827	0.120707	1	SNAI1
GO:0061029	eyelid development in camera-type eye	1/114	13/18903	0.0756483	0.174827	0.120707	1	INHBA
GO:0070486	leukocyte aggregation	1/114	13/18903	0.0756483	0.174827	0.120707	1	IL1B
GO:0071285	cellular response to lithium ion	1/114	13/18903	0.0756483	0.174827	0.120707	1	FABP4
GO:0071389	cellular response to mineralocorticoid stimulus	1/114	13/18903	0.0756483	0.174827	0.120707	1	EDN1
GO:0090153	regulation of sphingolipid biosynthetic process	1/114	13/18903	0.0756483	0.174827	0.120707	1	CCN1
GO:1900121	negative regulation of receptor binding	1/114	13/18903	0.0756483	0.174827	0.120707	1	NOG
GO:1903624	regulation of DNA catabolic process	1/114	13/18903	0.0756483	0.174827	0.120707	1	IL6
GO:1903909	regulation of receptor clustering	1/114	13/18903	0.0756483	0.174827	0.120707	1	TNFAIP6
GO:1904748	regulation of apoptotic process involved in development	1/114	13/18903	0.0756483	0.174827	0.120707	1	TGFB2
GO:1905038	regulation of membrane lipid metabolic process	1/114	13/18903	0.0756483	0.174827	0.120707	1	CCN1
GO:2000615	regulation of histone H3-K9 acetylation	1/114	13/18903	0.0756483	0.174827	0.120707	1	PIWIL2
GO:2001198	regulation of dendritic cell differentiation	1/114	13/18903	0.0756483	0.174827	0.120707	1	CEBPB
GO:0006633	fatty acid biosynthetic process	3/114	164/18903	0.0769344	0.177149	0.12231	3	EDN1/IL1B/PTGS2
GO:0021915	neural tube development	3/114	164/18903	0.0769344	0.177149	0.12231	3	ADM/NOG/TGFB2
GO:0055067	monovalent inorganic cation homeostasis	3/114	164/18903	0.0769344	0.177149	0.12231	3	EDN1/SLC11A1/SLC4A4
GO:0009166	nucleotide catabolic process	2/114	76/18903	0.077047	0.177149	0.12231	2	NT5E/PDE4B
GO:0015807	L-amino acid transport	2/114	76/18903	0.077047	0.177149	0.12231	2	SLC11A1/SLC7A2
GO:0045685	regulation of glial cell differentiation	2/114	76/18903	0.077047	0.177149	0.12231	2	IL6/NOG
GO:0051091	positive regulation of DNA-binding transcription factor activity	4/114	266/18903	0.0774331	0.177885	0.122818	4	EDN1/IL1B/IL6/NLRP3
GO:0002534	cytokine production involved in inflammatory response	2/114	77/18903	0.0788	0.180411	0.124562	2	IL6/MEFV
GO:0006024	glycosaminoglycan biosynthetic process	2/114	77/18903	0.0788	0.180411	0.124562	2	HAS1/IL1B
GO:0010827	regulation of glucose transmembrane transport	2/114	77/18903	0.0788	0.180411	0.124562	2	EDN1/IL1B
GO:1900015	regulation of cytokine production involved in inflammatory response	2/114	77/18903	0.0788	0.180411	0.124562	2	IL6/MEFV
GO:0051250	negative regulation of lymphocyte activation	3/114	166/18903	0.0791316	0.18075	0.124796	3	CEBPB/IL4I1/INHBA
GO:0003205	cardiac chamber development	3/114	167/18903	0.0802405	0.18075	0.124796	3	CCN1/NOG/TGFB2
GO:0070665	positive regulation of leukocyte proliferation	3/114	167/18903	0.0802405	0.18075	0.124796	3	CSF2/IL1B/IL6
GO:0045913	positive regulation of carbohydrate metabolic process	2/114	78/18903	0.0805656	0.18075	0.124796	2	NNMT/SLC4A4
GO:0050772	positive regulation of axonogenesis	2/114	78/18903	0.0805656	0.18075	0.124796	2	FN1/L1CAM
GO:0070373	negative regulation of ERK1 and ERK2 cascade	2/114	78/18903	0.0805656	0.18075	0.124796	2	DUSP6/PTPRR
GO:0090049	regulation of cell migration involved in sprouting angiogenesis	2/114	78/18903	0.0805656	0.18075	0.124796	2	PTGS2/THBS1
GO:1902475	L-alpha-amino acid transmembrane transport	2/114	78/18903	0.0805656	0.18075	0.124796	2	SLC11A1/SLC7A2
GO:0002475	antigen processing and presentation via MHC class Ib	1/114	14/18903	0.0812267	0.18075	0.124796	1	HLA-H
GO:0003222	ventricular trabecula myocardium morphogenesis	1/114	14/18903	0.0812267	0.18075	0.124796	1	TGFB2
GO:0009158	ribonucleoside monophosphate catabolic process	1/114	14/18903	0.0812267	0.18075	0.124796	1	NT5E
GO:0010752	regulation of cGMP-mediated signaling	1/114	14/18903	0.0812267	0.18075	0.124796	1	THBS1
GO:0015697	quaternary ammonium group transport	1/114	14/18903	0.0812267	0.18075	0.124796	1	SLC22A4
GO:0016322	neuron remodeling	1/114	14/18903	0.0812267	0.18075	0.124796	1	NTN4
GO:0042117	monocyte activation	1/114	14/18903	0.0812267	0.18075	0.124796	1	FN1
GO:0042754	negative regulation of circadian rhythm	1/114	14/18903	0.0812267	0.18075	0.124796	1	PIWIL2
GO:0044793	negative regulation by host of viral process	1/114	14/18903	0.0812267	0.18075	0.124796	1	PTX3
GO:0047484	regulation of response to osmotic stress	1/114	14/18903	0.0812267	0.18075	0.124796	1	PTGS2
GO:0050930	induction of positive chemotaxis	1/114	14/18903	0.0812267	0.18075	0.124796	1	CXCL8
GO:0051547	regulation of keratinocyte migration	1/114	14/18903	0.0812267	0.18075	0.124796	1	HBEGF
GO:0061043	regulation of vascular wound healing	1/114	14/18903	0.0812267	0.18075	0.124796	1	SERPINE1
GO:0070942	neutrophil mediated cytotoxicity	1/114	14/18903	0.0812267	0.18075	0.124796	1	TREM1
GO:0071801	regulation of podosome assembly	1/114	14/18903	0.0812267	0.18075	0.124796	1	CSF2
GO:0071871	response to epinephrine	1/114	14/18903	0.0812267	0.18075	0.124796	1	PDE4B
GO:0072531	pyrimidine-containing compound transmembrane transport	1/114	14/18903	0.0812267	0.18075	0.124796	1	AQP9
GO:0072540	T-helper 17 cell lineage commitment	1/114	14/18903	0.0812267	0.18075	0.124796	1	IL6
GO:0097091	synaptic vesicle clustering	1/114	14/18903	0.0812267	0.18075	0.124796	1	SYN1
GO:0099171	presynaptic modulation of chemical synaptic transmission	1/114	14/18903	0.0812267	0.18075	0.124796	1	NOG
GO:1901077	regulation of relaxation of muscle	1/114	14/18903	0.0812267	0.18075	0.124796	1	PDE4B
GO:1901533	negative regulation of hematopoietic progenitor cell differentiation	1/114	14/18903	0.0812267	0.18075	0.124796	1	ZFP36
GO:1901841	regulation of high voltage-gated calcium channel activity	1/114	14/18903	0.0812267	0.18075	0.124796	1	PDE4B
GO:1902043	positive regulation of extrinsic apoptotic signaling pathway via death domain receptors	1/114	14/18903	0.0812267	0.18075	0.124796	1	THBS1
GO:1902287	semaphorin-plexin signaling pathway involved in axon guidance	1/114	14/18903	0.0812267	0.18075	0.124796	1	EDN1
GO:1905049	negative regulation of metallopeptidase activity	1/114	14/18903	0.0812267	0.18075	0.124796	1	TIMP1
GO:0048639	positive regulation of developmental growth	3/114	168/18903	0.0813561	0.180888	0.124892	3	EDN1/FN1/L1CAM
GO:0071560	cellular response to transforming growth factor beta stimulus	4/114	271/18903	0.0816241	0.181335	0.1252	4	EDN1/GDF15/TGFB2/THBS1
GO:0002292	T cell differentiation involved in immune response	2/114	79/18903	0.0823434	0.182782	0.126199	2	IL6/NLRP3
GO:0007156	homophilic cell adhesion via plasma membrane adhesion molecules	3/114	170/18903	0.0836077	0.185283	0.127926	3	AMIGO2/L1CAM/PCDHB9
GO:0050806	positive regulation of synaptic transmission	3/114	170/18903	0.0836077	0.185283	0.127926	3	MME/NOG/PTGS2
GO:0048644	muscle organ morphogenesis	2/114	80/18903	0.0841333	0.186295	0.128625	2	NOG/TGFB2
GO:2001242	regulation of intrinsic apoptotic signaling pathway	3/114	172/18903	0.0858859	0.186829	0.128994	3	PLAUR/PTGS2/SNAI1
GO:0006023	aminoglycan biosynthetic process	2/114	81/18903	0.0859351	0.186829	0.128994	2	HAS1/IL1B
GO:0014855	striated muscle cell proliferation	2/114	81/18903	0.0859351	0.186829	0.128994	2	NOG/TGFB2
GO:0006570	tyrosine metabolic process	1/114	15/18903	0.0867718	0.186829	0.128994	1	IL4I1
GO:0007567	parturition	1/114	15/18903	0.0867718	0.186829	0.128994	1	EDN1
GO:0009163	nucleoside biosynthetic process	1/114	15/18903	0.0867718	0.186829	0.128994	1	NT5E
GO:0010838	positive regulation of keratinocyte proliferation	1/114	15/18903	0.0867718	0.186829	0.128994	1	AREG
GO:0014029	neural crest formation	1/114	15/18903	0.0867718	0.186829	0.128994	1	EDN1
GO:0032352	positive regulation of hormone metabolic process	1/114	15/18903	0.0867718	0.186829	0.128994	1	ADM
GO:0032725	positive regulation of granulocyte macrophage colony-stimulating factor production	1/114	15/18903	0.0867718	0.186829	0.128994	1	IL1B
GO:0032897	negative regulation of viral transcription	1/114	15/18903	0.0867718	0.186829	0.128994	1	ZFP36
GO:0032905	transforming growth factor beta1 production	1/114	15/18903	0.0867718	0.186829	0.128994	1	THBS1
GO:0034392	negative regulation of smooth muscle cell apoptotic process	1/114	15/18903	0.0867718	0.186829	0.128994	1	EDN1
GO:0034404	nucleobase-containing small molecule biosynthetic process	1/114	15/18903	0.0867718	0.186829	0.128994	1	NT5E
GO:0042532	negative regulation of tyrosine phosphorylation of STAT protein	1/114	15/18903	0.0867718	0.186829	0.128994	1	SOCS3
GO:0043518	negative regulation of DNA damage response, signal transduction by p53 class mediator	1/114	15/18903	0.0867718	0.186829	0.128994	1	SNAI1
GO:0043970	histone H3-K9 acetylation	1/114	15/18903	0.0867718	0.186829	0.128994	1	PIWIL2
GO:0045064	T-helper 2 cell differentiation	1/114	15/18903	0.0867718	0.186829	0.128994	1	NLRP3
GO:0048712	negative regulation of astrocyte differentiation	1/114	15/18903	0.0867718	0.186829	0.128994	1	NOG
GO:0048820	hair follicle maturation	1/114	15/18903	0.0867718	0.186829	0.128994	1	TGFB2
GO:0060211	regulation of nuclear-transcribed mRNA poly(A) tail shortening	1/114	15/18903	0.0867718	0.186829	0.128994	1	ZFP36
GO:0060354	negative regulation of cell adhesion molecule production	1/114	15/18903	0.0867718	0.186829	0.128994	1	CXCL8
GO:0060572	morphogenesis of an epithelial bud	1/114	15/18903	0.0867718	0.186829	0.128994	1	NOG
GO:0061307	cardiac neural crest cell differentiation involved in heart development	1/114	15/18903	0.0867718	0.186829	0.128994	1	EDN1
GO:0061308	cardiac neural crest cell development involved in heart development	1/114	15/18903	0.0867718	0.186829	0.128994	1	EDN1
GO:0070262	peptidyl-serine dephosphorylation	1/114	15/18903	0.0867718	0.186829	0.128994	1	DUSP1
GO:0070831	basement membrane assembly	1/114	15/18903	0.0867718	0.186829	0.128994	1	NTN4
GO:0071639	positive regulation of monocyte chemotactic protein-1 production	1/114	15/18903	0.0867718	0.186829	0.128994	1	IL1B
GO:0072498	embryonic skeletal joint development	1/114	15/18903	0.0867718	0.186829	0.128994	1	NOG
GO:0106070	regulation of adenylate cyclase-activating G protein-coupled receptor signaling pathway	1/114	15/18903	0.0867718	0.186829	0.128994	1	PDE4B
GO:0110156	methylguanosine-cap decapping	1/114	15/18903	0.0867718	0.186829	0.128994	1	ZFP36
GO:1900153	positive regulation of nuclear-transcribed mRNA catabolic process, deadenylation-dependent decay	1/114	15/18903	0.0867718	0.186829	0.128994	1	ZFP36
GO:1901722	regulation of cell proliferation involved in kidney development	1/114	15/18903	0.0867718	0.186829	0.128994	1	ITGB3
GO:2000767	positive regulation of cytoplasmic translation	1/114	15/18903	0.0867718	0.186829	0.128994	1	IGF2BP1
GO:0071559	response to transforming growth factor beta	4/114	277/18903	0.0867991	0.186829	0.128994	4	EDN1/GDF15/TGFB2/THBS1
GO:0010770	positive regulation of cell morphogenesis involved in differentiation	2/114	82/18903	0.0877486	0.188722	0.130301	2	FGA/ITGB3
GO:0010950	positive regulation of endopeptidase activity	3/114	174/18903	0.0881905	0.189522	0.130853	3	CCN1/MEFV/NLRP3
GO:0043488	regulation of mRNA stability	3/114	175/18903	0.0893526	0.191866	0.132471	3	IGF2BP1/SLC11A1/ZFP36
GO:0030500	regulation of bone mineralization	2/114	83/18903	0.0895735	0.192188	0.132693	2	CCN1/SRGN
GO:0043542	endothelial cell migration	4/114	281/18903	0.0903363	0.193387	0.133521	4	EDN1/ITGB3/PTGS2/THBS1
GO:0050680	negative regulation of epithelial cell proliferation	3/114	176/18903	0.0905211	0.193387	0.133521	3	EREG/TGFB2/THBS1
GO:0071900	regulation of protein serine/threonine kinase activity	5/114	395/18903	0.0909095	0.193387	0.133521	5	DUSP1/EDN1/IL1B/PKIB/THBS1
GO:0019827	stem cell population maintenance	3/114	177/18903	0.0916961	0.193387	0.133521	3	IGF2BP1/NOG/PIWIL2
GO:2000113	negative regulation of cellular macromolecule biosynthetic process	4/114	283/18903	0.0921307	0.193387	0.133521	4	C8orf88/HBEGF/IGF2BP1/ZFP36
GO:0002399	MHC class II protein complex assembly	1/114	16/18903	0.0922836	0.193387	0.133521	1	HLA-DRB4
GO:0002503	peptide antigen assembly with MHC class II protein complex	1/114	16/18903	0.0922836	0.193387	0.133521	1	HLA-DRB4
GO:0006828	manganese ion transport	1/114	16/18903	0.0922836	0.193387	0.133521	1	SLC11A1
GO:0009074	aromatic amino acid family catabolic process	1/114	16/18903	0.0922836	0.193387	0.133521	1	IL4I1
GO:0010715	regulation of extracellular matrix disassembly	1/114	16/18903	0.0922836	0.193387	0.133521	1	IL6
GO:0023035	CD40 signaling pathway	1/114	16/18903	0.0922836	0.193387	0.133521	1	ITGA5
GO:0031053	primary miRNA processing	1/114	16/18903	0.0922836	0.193387	0.133521	1	IL6
GO:0036376	sodium ion export across plasma membrane	1/114	16/18903	0.0922836	0.193387	0.133521	1	SLC4A4
GO:0042448	progesterone metabolic process	1/114	16/18903	0.0922836	0.193387	0.133521	1	ADM
GO:0044406	adhesion of symbiont to host	1/114	16/18903	0.0922836	0.193387	0.133521	1	BPIFA1
GO:0045187	regulation of circadian sleep/wake cycle, sleep	1/114	16/18903	0.0922836	0.193387	0.133521	1	CSF2
GO:0045779	negative regulation of bone resorption	1/114	16/18903	0.0922836	0.193387	0.133521	1	IL6
GO:0045836	positive regulation of meiotic nuclear division	1/114	16/18903	0.0922836	0.193387	0.133521	1	PIWIL2
GO:0045986	negative regulation of smooth muscle contraction	1/114	16/18903	0.0922836	0.193387	0.133521	1	PTGS2
GO:0048266	behavioral response to pain	1/114	16/18903	0.0922836	0.193387	0.133521	1	THBS1
GO:0050872	white fat cell differentiation	1/114	16/18903	0.0922836	0.193387	0.133521	1	FABP4
GO:0051044	positive regulation of membrane protein ectodomain proteolysis	1/114	16/18903	0.0922836	0.193387	0.133521	1	IL1B
GO:0051447	negative regulation of meiotic cell cycle	1/114	16/18903	0.0922836	0.193387	0.133521	1	DUSP1
GO:0061469	regulation of type B pancreatic cell proliferation	1/114	16/18903	0.0922836	0.193387	0.133521	1	PTPRN
GO:0090336	positive regulation of brown fat cell differentiation	1/114	16/18903	0.0922836	0.193387	0.133521	1	PTGS2
GO:0097154	GABAergic neuron differentiation	1/114	16/18903	0.0922836	0.193387	0.133521	1	INHBA
GO:1901741	positive regulation of myoblast fusion	1/114	16/18903	0.0922836	0.193387	0.133521	1	GDF15
GO:1902285	semaphorin-plexin signaling pathway involved in neuron projection guidance	1/114	16/18903	0.0922836	0.193387	0.133521	1	EDN1
GO:1903799	negative regulation of miRNA maturation	1/114	16/18903	0.0922836	0.193387	0.133521	1	IL6
GO:2001212	regulation of vasculogenesis	1/114	16/18903	0.0922836	0.193387	0.133521	1	ADM
GO:0034103	regulation of tissue remodeling	2/114	85/18903	0.0932569	0.194972	0.134616	2	IL6/ITGB3
GO:0051453	regulation of intracellular pH	2/114	85/18903	0.0932569	0.194972	0.134616	2	SLC11A1/SLC4A4
GO:1901292	nucleoside phosphate catabolic process	2/114	85/18903	0.0932569	0.194972	0.134616	2	NT5E/PDE4B
GO:0051321	meiotic cell cycle	4/114	285/18903	0.0939421	0.196205	0.135467	4	DUSP1/EDN1/EREG/PIWIL2
GO:0048771	tissue remodeling	3/114	179/18903	0.0940651	0.196205	0.135467	3	IL6/ITGB3/TIMP1
GO:0090276	regulation of peptide hormone secretion	3/114	179/18903	0.0940651	0.196205	0.135467	3	FGA/IL1B/IL6
GO:0051251	positive regulation of lymphocyte activation	5/114	400/18903	0.0946517	0.197276	0.136207	5	HLA-DRB4/IL1B/IL4I1/IL6/NLRP3
GO:0006970	response to osmotic stress	2/114	86/18903	0.095115	0.197936	0.136662	2	NLRP3/PTGS2
GO:0019935	cyclic-nucleotide-mediated signaling	2/114	86/18903	0.095115	0.197936	0.136662	2	ADM/THBS1
GO:0098727	maintenance of cell number	3/114	181/18903	0.0964594	0.199143	0.137496	3	IGF2BP1/NOG/PIWIL2
GO:0050672	negative regulation of lymphocyte proliferation	2/114	87/18903	0.0969838	0.199143	0.137496	2	CEBPB/IL4I1
GO:2000243	positive regulation of reproductive process	2/114	87/18903	0.0969838	0.199143	0.137496	2	INHBA/PIWIL2
GO:0002791	regulation of peptide secretion	3/114	182/18903	0.0976658	0.199143	0.137496	3	FGA/IL1B/IL6
GO:0003184	pulmonary valve morphogenesis	1/114	17/18903	0.0977625	0.199143	0.137496	1	TGFB2
GO:0003356	regulation of cilium beat frequency	1/114	17/18903	0.0977625	0.199143	0.137496	1	CATSPER1
GO:0006577	amino-acid betaine metabolic process	1/114	17/18903	0.0977625	0.199143	0.137496	1	SLC22A4
GO:0008228	opsonization	1/114	17/18903	0.0977625	0.199143	0.137496	1	PTX3
GO:0010224	response to UV-B	1/114	17/18903	0.0977625	0.199143	0.137496	1	MME
GO:0010566	regulation of ketone biosynthetic process	1/114	17/18903	0.0977625	0.199143	0.137496	1	ADM
GO:0019885	antigen processing and presentation of endogenous peptide antigen via MHC class I	1/114	17/18903	0.0977625	0.199143	0.137496	1	HLA-H
GO:0020027	hemoglobin metabolic process	1/114	17/18903	0.0977625	0.199143	0.137496	1	INHBA
GO:0030322	stabilization of membrane potential	1/114	17/18903	0.0977625	0.199143	0.137496	1	KCNK13
GO:0032274	gonadotropin secretion	1/114	17/18903	0.0977625	0.199143	0.137496	1	INHBA
GO:0033631	cell-cell adhesion mediated by integrin	1/114	17/18903	0.0977625	0.199143	0.137496	1	ITGA5
GO:0042481	regulation of odontogenesis	1/114	17/18903	0.0977625	0.199143	0.137496	1	EDN1
GO:0044539	long-chain fatty acid import into cell	1/114	17/18903	0.0977625	0.199143	0.137496	1	THBS1
GO:0051895	negative regulation of focal adhesion assembly	1/114	17/18903	0.0977625	0.199143	0.137496	1	THBS1
GO:0055119	relaxation of cardiac muscle	1/114	17/18903	0.0977625	0.199143	0.137496	1	PDE4B
GO:0061158	3'-UTR-mediated mRNA destabilization	1/114	17/18903	0.0977625	0.199143	0.137496	1	ZFP36
GO:0071732	cellular response to nitric oxide	1/114	17/18903	0.0977625	0.199143	0.137496	1	MMP3
GO:0072109	glomerular mesangium development	1/114	17/18903	0.0977625	0.199143	0.137496	1	ITGB3
GO:0090594	inflammatory response to wounding	1/114	17/18903	0.0977625	0.199143	0.137496	1	TIMP1
GO:0150118	negative regulation of cell-substrate junction organization	1/114	17/18903	0.0977625	0.199143	0.137496	1	THBS1
GO:1901550	regulation of endothelial cell development	1/114	17/18903	0.0977625	0.199143	0.137496	1	IL1B
GO:1903140	regulation of establishment of endothelial barrier	1/114	17/18903	0.0977625	0.199143	0.137496	1	IL1B
GO:1904355	positive regulation of telomere capping	1/114	17/18903	0.0977625	0.199143	0.137496	1	PKIB
GO:2001267	regulation of cysteine-type endopeptidase activity involved in apoptotic signaling pathway	1/114	17/18903	0.0977625	0.199143	0.137496	1	PLAUR
GO:0032370	positive regulation of lipid transport	2/114	88/18903	0.0988631	0.200659	0.138542	2	EDN1/IL1B
GO:0032945	negative regulation of mononuclear cell proliferation	2/114	88/18903	0.0988631	0.200659	0.138542	2	CEBPB/IL4I1
GO:0043367	CD4-positive, alpha-beta T cell differentiation	2/114	88/18903	0.0988631	0.200659	0.138542	2	IL6/NLRP3
GO:0001936	regulation of endothelial cell proliferation	3/114	183/18903	0.0988785	0.200659	0.138542	3	APLN/ITGB3/THBS1
GO:0030073	insulin secretion	3/114	183/18903	0.0988785	0.200659	0.138542	3	IL1B/IL6/PTPRN
GO:0007416	synapse assembly	3/114	184/18903	0.100097	0.202522	0.139829	3	AMIGO2/DNER/PCDHB9
GO:0032640	tumor necrosis factor production	3/114	184/18903	0.100097	0.202522	0.139829	3	IL6/THBS1/ZFP36
GO:0032680	regulation of tumor necrosis factor production	3/114	184/18903	0.100097	0.202522	0.139829	3	IL6/THBS1/ZFP36
GO:0090087	regulation of peptide transport	3/114	184/18903	0.100097	0.202522	0.139829	3	FGA/IL1B/IL6
GO:0007589	body fluid secretion	2/114	89/18903	0.100753	0.202586	0.139873	2	APLN/EDN1
GO:0046849	bone remodeling	2/114	89/18903	0.100753	0.202586	0.139873	2	IL6/ITGB3
GO:0002040	sprouting angiogenesis	3/114	185/18903	0.101322	0.202586	0.139873	3	ITGA5/PTGS2/THBS1
GO:0009615	response to virus	5/114	409/18903	0.101584	0.202586	0.139873	5	BPIFA1/IL1B/IL6/ITGAX/NLRP3
GO:0042692	muscle cell differentiation	5/114	409/18903	0.101584	0.202586	0.139873	5	ADM/DNER/EDN1/EREG/GDF15
GO:0009266	response to temperature stimulus	3/114	186/18903	0.102553	0.202586	0.139873	3	ADM/PTGS2/THBS1
GO:0010586	miRNA metabolic process	2/114	90/18903	0.102652	0.202586	0.139873	2	APLN/TGFB2
GO:0030641	regulation of cellular pH	2/114	90/18903	0.102652	0.202586	0.139873	2	SLC11A1/SLC4A4
GO:0051591	response to cAMP	2/114	90/18903	0.102652	0.202586	0.139873	2	AQP9/AREG
GO:0055006	cardiac cell development	2/114	90/18903	0.102652	0.202586	0.139873	2	EDN1/INHBA
GO:0002295	T-helper cell lineage commitment	1/114	18/18903	0.103209	0.202586	0.139873	1	IL6
GO:0003159	morphogenesis of an endothelium	1/114	18/18903	0.103209	0.202586	0.139873	1	ITGAX
GO:0006309	apoptotic DNA fragmentation	1/114	18/18903	0.103209	0.202586	0.139873	1	IL6
GO:0009125	nucleoside monophosphate catabolic process	1/114	18/18903	0.103209	0.202586	0.139873	1	NT5E
GO:0016264	gap junction assembly	1/114	18/18903	0.103209	0.202586	0.139873	1	IL1B
GO:0030730	sequestering of triglyceride	1/114	18/18903	0.103209	0.202586	0.139873	1	IL1B
GO:0030903	notochord development	1/114	18/18903	0.103209	0.202586	0.139873	1	NOG
GO:0031643	positive regulation of myelination	1/114	18/18903	0.103209	0.202586	0.139873	1	ITGAX
GO:0032604	granulocyte macrophage colony-stimulating factor production	1/114	18/18903	0.103209	0.202586	0.139873	1	IL1B
GO:0032645	regulation of granulocyte macrophage colony-stimulating factor production	1/114	18/18903	0.103209	0.202586	0.139873	1	IL1B
GO:0035234	ectopic germ cell programmed cell death	1/114	18/18903	0.103209	0.202586	0.139873	1	IL1B
GO:0035970	peptidyl-threonine dephosphorylation	1/114	18/18903	0.103209	0.202586	0.139873	1	DUSP1
GO:0042402	cellular biogenic amine catabolic process	1/114	18/18903	0.103209	0.202586	0.139873	1	SAT1
GO:0043116	negative regulation of vascular permeability	1/114	18/18903	0.103209	0.202586	0.139873	1	ADM
GO:0045722	positive regulation of gluconeogenesis	1/114	18/18903	0.103209	0.202586	0.139873	1	NNMT
GO:0045780	positive regulation of bone resorption	1/114	18/18903	0.103209	0.202586	0.139873	1	ITGB3
GO:0045945	positive regulation of transcription by RNA polymerase III	1/114	18/18903	0.103209	0.202586	0.139873	1	INHBA
GO:0046827	positive regulation of protein export from nucleus	1/114	18/18903	0.103209	0.202586	0.139873	1	IL1B
GO:0046851	negative regulation of bone remodeling	1/114	18/18903	0.103209	0.202586	0.139873	1	IL6
GO:0050746	regulation of lipoprotein metabolic process	1/114	18/18903	0.103209	0.202586	0.139873	1	ITGB3
GO:0050802	circadian sleep/wake cycle, sleep	1/114	18/18903	0.103209	0.202586	0.139873	1	CSF2
GO:0051580	regulation of neurotransmitter uptake	1/114	18/18903	0.103209	0.202586	0.139873	1	ITGB3
GO:0060602	branch elongation of an epithelium	1/114	18/18903	0.103209	0.202586	0.139873	1	AREG
GO:0060644	mammary gland epithelial cell differentiation	1/114	18/18903	0.103209	0.202586	0.139873	1	CEBPB
GO:0061154	endothelial tube morphogenesis	1/114	18/18903	0.103209	0.202586	0.139873	1	ITGAX
GO:0071318	cellular response to ATP	1/114	18/18903	0.103209	0.202586	0.139873	1	PTGS2
GO:0071397	cellular response to cholesterol	1/114	18/18903	0.103209	0.202586	0.139873	1	INHBA
GO:0090190	positive regulation of branching involved in ureteric bud morphogenesis	1/114	18/18903	0.103209	0.202586	0.139873	1	NOG
GO:0110154	RNA decapping	1/114	18/18903	0.103209	0.202586	0.139873	1	ZFP36
GO:1902001	fatty acid transmembrane transport	1/114	18/18903	0.103209	0.202586	0.139873	1	THBS1
GO:2000811	negative regulation of anoikis	1/114	18/18903	0.103209	0.202586	0.139873	1	ITGA5
GO:0043487	regulation of RNA stability	3/114	187/18903	0.10379	0.203431	0.140456	3	IGF2BP1/SLC11A1/ZFP36
GO:0048469	cell maturation	3/114	187/18903	0.10379	0.203431	0.140456	3	EDN1/EREG/NTN4
GO:0030217	T cell differentiation	4/114	296/18903	0.104205	0.204096	0.140915	4	IL1B/IL4I1/IL6/NLRP3
GO:0042475	odontogenesis of dentin-containing tooth	2/114	91/18903	0.104562	0.204498	0.141193	2	ADM/SERPINE1
GO:0048525	negative regulation of viral process	2/114	91/18903	0.104562	0.204498	0.141193	2	PTX3/ZFP36
GO:0030308	negative regulation of cell growth	3/114	188/18903	0.105033	0.205271	0.141726	3	INHBA/SEMA3B/TGFB2
GO:0071706	tumor necrosis factor superfamily cytokine production	3/114	189/18903	0.106282	0.207411	0.143204	3	IL6/THBS1/ZFP36
GO:1903555	regulation of tumor necrosis factor superfamily cytokine production	3/114	189/18903	0.106282	0.207411	0.143204	3	IL6/THBS1/ZFP36
GO:0046031	ADP metabolic process	2/114	92/18903	0.106481	0.20765	0.143369	2	NT5E/SLC4A4
GO:0061013	regulation of mRNA catabolic process	3/114	190/18903	0.107536	0.208212	0.143757	3	IGF2BP1/SLC11A1/ZFP36
GO:0070301	cellular response to hydrogen peroxide	2/114	93/18903	0.10841	0.208212	0.143757	2	EDN1/IL6
GO:1904705	regulation of vascular associated smooth muscle cell proliferation	2/114	93/18903	0.10841	0.208212	0.143757	2	APLN/EDN1
GO:0002483	antigen processing and presentation of endogenous peptide antigen	1/114	19/18903	0.108622	0.208212	0.143757	1	HLA-H
GO:0002544	chronic inflammatory response	1/114	19/18903	0.108622	0.208212	0.143757	1	THBS1
GO:0006837	serotonin transport	1/114	19/18903	0.108622	0.208212	0.143757	1	ITGB3
GO:0010744	positive regulation of macrophage derived foam cell differentiation	1/114	19/18903	0.108622	0.208212	0.143757	1	CSF2
GO:0010759	positive regulation of macrophage chemotaxis	1/114	19/18903	0.108622	0.208212	0.143757	1	THBS1
GO:0032026	response to magnesium ion	1/114	19/18903	0.108622	0.208212	0.143757	1	THBS1
GO:0032930	positive regulation of superoxide anion generation	1/114	19/18903	0.108622	0.208212	0.143757	1	FPR2
GO:0035813	regulation of renal sodium excretion	1/114	19/18903	0.108622	0.208212	0.143757	1	EDN1
GO:0036003	positive regulation of transcription from RNA polymerase II promoter in response to stress	1/114	19/18903	0.108622	0.208212	0.143757	1	CEBPB
GO:0043652	engulfment of apoptotic cell	1/114	19/18903	0.108622	0.208212	0.143757	1	THBS1
GO:0045091	regulation of single stranded viral RNA replication via double stranded DNA intermediate	1/114	19/18903	0.108622	0.208212	0.143757	1	CXCL8
GO:0045947	negative regulation of translational initiation	1/114	19/18903	0.108622	0.208212	0.143757	1	C8orf88
GO:0046782	regulation of viral transcription	1/114	19/18903	0.108622	0.208212	0.143757	1	ZFP36
GO:0051797	regulation of hair follicle development	1/114	19/18903	0.108622	0.208212	0.143757	1	TGFB2
GO:0060044	negative regulation of cardiac muscle cell proliferation	1/114	19/18903	0.108622	0.208212	0.143757	1	NOG
GO:0071800	podosome assembly	1/114	19/18903	0.108622	0.208212	0.143757	1	CSF2
GO:0098884	postsynaptic neurotransmitter receptor internalization	1/114	19/18903	0.108622	0.208212	0.143757	1	ITGB3
GO:0140239	postsynaptic endocytosis	1/114	19/18903	0.108622	0.208212	0.143757	1	ITGB3
GO:0140354	lipid import into cell	1/114	19/18903	0.108622	0.208212	0.143757	1	THBS1
GO:1901659	glycosyl compound biosynthetic process	1/114	19/18903	0.108622	0.208212	0.143757	1	NT5E
GO:1902170	cellular response to reactive nitrogen species	1/114	19/18903	0.108622	0.208212	0.143757	1	MMP3
GO:0055001	muscle cell development	3/114	191/18903	0.108797	0.208398	0.143886	3	ADM/DNER/EDN1
GO:0002042	cell migration involved in sprouting angiogenesis	2/114	94/18903	0.110348	0.21107	0.14573	2	PTGS2/THBS1
GO:0009953	dorsal/ventral pattern formation	2/114	94/18903	0.110348	0.21107	0.14573	2	EDN1/NOG
GO:0051607	defense response to virus	4/114	304/18903	0.111979	0.213519	0.147421	4	BPIFA1/IL1B/IL6/ITGAX
GO:1990874	vascular associated smooth muscle cell proliferation	2/114	95/18903	0.112295	0.213519	0.147421	2	APLN/EDN1
GO:0140546	defense response to symbiont	4/114	305/18903	0.112969	0.213519	0.147421	4	BPIFA1/IL1B/IL6/ITGAX
GO:0032872	regulation of stress-activated MAPK cascade	3/114	195/18903	0.113896	0.213519	0.147421	3	DUSP1/IL1B/TGFB2
GO:0002396	MHC protein complex assembly	1/114	20/18903	0.114003	0.213519	0.147421	1	HLA-DRB4
GO:0002501	peptide antigen assembly with MHC protein complex	1/114	20/18903	0.114003	0.213519	0.147421	1	HLA-DRB4
GO:0002837	regulation of immune response to tumor cell	1/114	20/18903	0.114003	0.213519	0.147421	1	IL4I1
GO:0003215	cardiac right ventricle morphogenesis	1/114	20/18903	0.114003	0.213519	0.147421	1	TGFB2
GO:0006700	C21-steroid hormone biosynthetic process	1/114	20/18903	0.114003	0.213519	0.147421	1	ADM
GO:0009110	vitamin biosynthetic process	1/114	20/18903	0.114003	0.213519	0.147421	1	SNAI1
GO:0009310	amine catabolic process	1/114	20/18903	0.114003	0.213519	0.147421	1	SAT1
GO:0010288	response to lead ion	1/114	20/18903	0.114003	0.213519	0.147421	1	PTGS2
GO:0010310	regulation of hydrogen peroxide metabolic process	1/114	20/18903	0.114003	0.213519	0.147421	1	MMP3
GO:0039692	single stranded viral RNA replication via double stranded DNA intermediate	1/114	20/18903	0.114003	0.213519	0.147421	1	CXCL8
GO:0042359	vitamin D metabolic process	1/114	20/18903	0.114003	0.213519	0.147421	1	SNAI1
GO:0042749	regulation of circadian sleep/wake cycle	1/114	20/18903	0.114003	0.213519	0.147421	1	CSF2
GO:0043011	myeloid dendritic cell differentiation	1/114	20/18903	0.114003	0.213519	0.147421	1	CSF2
GO:0043046	DNA methylation involved in gamete generation	1/114	20/18903	0.114003	0.213519	0.147421	1	PIWIL2
GO:0045342	MHC class II biosynthetic process	1/114	20/18903	0.114003	0.213519	0.147421	1	SLC11A1
GO:0051546	keratinocyte migration	1/114	20/18903	0.114003	0.213519	0.147421	1	HBEGF
GO:0060716	labyrinthine layer blood vessel development	1/114	20/18903	0.114003	0.213519	0.147421	1	CCN1
GO:0060749	mammary gland alveolus development	1/114	20/18903	0.114003	0.213519	0.147421	1	AREG
GO:0061377	mammary gland lobule development	1/114	20/18903	0.114003	0.213519	0.147421	1	AREG
GO:0072079	nephron tubule formation	1/114	20/18903	0.114003	0.213519	0.147421	1	NOG
GO:0097709	connective tissue replacement	1/114	20/18903	0.114003	0.213519	0.147421	1	TIMP1
GO:1900225	regulation of NLRP3 inflammasome complex assembly	1/114	20/18903	0.114003	0.213519	0.147421	1	MEFV
GO:1903232	melanosome assembly	1/114	20/18903	0.114003	0.213519	0.147421	1	RAB32
GO:1903978	regulation of microglial cell activation	1/114	20/18903	0.114003	0.213519	0.147421	1	IL6
GO:1905209	positive regulation of cardiocyte differentiation	1/114	20/18903	0.114003	0.213519	0.147421	1	TGFB2
GO:2000479	regulation of cAMP-dependent protein kinase activity	1/114	20/18903	0.114003	0.213519	0.147421	1	PKIB
GO:0003073	regulation of systemic arterial blood pressure	2/114	96/18903	0.114252	0.213539	0.147435	2	ADM/EDN1
GO:0019217	regulation of fatty acid metabolic process	2/114	96/18903	0.114252	0.213539	0.147435	2	IL1B/PTGS2
GO:0070664	negative regulation of leukocyte proliferation	2/114	96/18903	0.114252	0.213539	0.147435	2	CEBPB/IL4I1
GO:0008593	regulation of Notch signaling pathway	2/114	97/18903	0.116217	0.217062	0.149867	2	MAGEA1/TGFB2
GO:0001822	kidney development	4/114	309/18903	0.116966	0.218159	0.150625	4	ITGB3/MME/NOG/TGFB2
GO:0055074	calcium ion homeostasis	4/114	309/18903	0.116966	0.218159	0.150625	4	ADM/EDN1/ITGB3/NT5E
GO:0002695	negative regulation of leukocyte activation	3/114	198/18903	0.117779	0.21838	0.150778	3	CEBPB/IL4I1/INHBA
GO:0070302	regulation of stress-activated protein kinase signaling cascade	3/114	198/18903	0.117779	0.21838	0.150778	3	DUSP1/IL1B/TGFB2
GO:0071248	cellular response to metal ion	3/114	198/18903	0.117779	0.21838	0.150778	3	EDN1/FABP4/PTGS2
GO:0009746	response to hexose	3/114	199/18903	0.119085	0.21838	0.150778	3	PTGS2/PTPRN/THBS1
GO:0002834	regulation of response to tumor cell	1/114	21/18903	0.119352	0.21838	0.150778	1	IL4I1
GO:0003177	pulmonary valve development	1/114	21/18903	0.119352	0.21838	0.150778	1	TGFB2
GO:0006590	thyroid hormone generation	1/114	21/18903	0.119352	0.21838	0.150778	1	TG
GO:0010002	cardioblast differentiation	1/114	21/18903	0.119352	0.21838	0.150778	1	TGFB2
GO:0010829	negative regulation of glucose transmembrane transport	1/114	21/18903	0.119352	0.21838	0.150778	1	IL1B
GO:0021756	striatum development	1/114	21/18903	0.119352	0.21838	0.150778	1	INHBA
GO:0022410	circadian sleep/wake cycle process	1/114	21/18903	0.119352	0.21838	0.150778	1	CSF2
GO:0030502	negative regulation of bone mineralization	1/114	21/18903	0.119352	0.21838	0.150778	1	SRGN
GO:0034755	iron ion transmembrane transport	1/114	21/18903	0.119352	0.21838	0.150778	1	SLC11A1
GO:0035812	renal sodium excretion	1/114	21/18903	0.119352	0.21838	0.150778	1	EDN1
GO:0043373	CD4-positive, alpha-beta T cell lineage commitment	1/114	21/18903	0.119352	0.21838	0.150778	1	IL6
GO:0045821	positive regulation of glycolytic process	1/114	21/18903	0.119352	0.21838	0.150778	1	SLC4A4
GO:0060445	branching involved in salivary gland morphogenesis	1/114	21/18903	0.119352	0.21838	0.150778	1	NTN4
GO:0060973	cell migration involved in heart development	1/114	21/18903	0.119352	0.21838	0.150778	1	EDN1
GO:0061050	regulation of cell growth involved in cardiac muscle cell development	1/114	21/18903	0.119352	0.21838	0.150778	1	EDN1
GO:0071498	cellular response to fluid shear stress	1/114	21/18903	0.119352	0.21838	0.150778	1	PTGS2
GO:0071605	monocyte chemotactic protein-1 production	1/114	21/18903	0.119352	0.21838	0.150778	1	IL1B
GO:0071637	regulation of monocyte chemotactic protein-1 production	1/114	21/18903	0.119352	0.21838	0.150778	1	IL1B
GO:0071731	response to nitric oxide	1/114	21/18903	0.119352	0.21838	0.150778	1	MMP3
GO:0090189	regulation of branching involved in ureteric bud morphogenesis	1/114	21/18903	0.119352	0.21838	0.150778	1	NOG
GO:0090231	regulation of spindle checkpoint	1/114	21/18903	0.119352	0.21838	0.150778	1	DUSP1
GO:0090266	regulation of mitotic cell cycle spindle assembly checkpoint	1/114	21/18903	0.119352	0.21838	0.150778	1	DUSP1
GO:1901739	regulation of myoblast fusion	1/114	21/18903	0.119352	0.21838	0.150778	1	GDF15
GO:1903504	regulation of mitotic spindle checkpoint	1/114	21/18903	0.119352	0.21838	0.150778	1	DUSP1
GO:0050808	synapse organization	5/114	432/18903	0.120419	0.220182	0.152022	5	AMIGO2/DNER/L1CAM/PCDHB9/SYN1
GO:0018105	peptidyl-serine phosphorylation	4/114	313/18903	0.121026	0.221143	0.152685	4	IL11/IL6/OSM/PTGS2
GO:0010769	regulation of cell morphogenesis involved in differentiation	2/114	100/18903	0.122163	0.22307	0.154016	2	FGA/ITGB3
GO:0003228	atrial cardiac muscle tissue development	1/114	22/18903	0.124669	0.223708	0.154456	1	NOG
GO:0007342	fusion of sperm to egg plasma membrane involved in single fertilization	1/114	22/18903	0.124669	0.223708	0.154456	1	FOLR3
GO:0009713	catechol-containing compound biosynthetic process	1/114	22/18903	0.124669	0.223708	0.154456	1	TGFB2
GO:0010042	response to manganese ion	1/114	22/18903	0.124669	0.223708	0.154456	1	PTGS2
GO:0021533	cell differentiation in hindbrain	1/114	22/18903	0.124669	0.223708	0.154456	1	NOG
GO:0030449	regulation of complement activation	1/114	22/18903	0.124669	0.223708	0.154456	1	IL1B
GO:0032891	negative regulation of organic acid transport	1/114	22/18903	0.124669	0.223708	0.154456	1	THBS1
GO:0032928	regulation of superoxide anion generation	1/114	22/18903	0.124669	0.223708	0.154456	1	FPR2
GO:0034104	negative regulation of tissue remodeling	1/114	22/18903	0.124669	0.223708	0.154456	1	IL6
GO:0035584	calcium-mediated signaling using intracellular calcium source	1/114	22/18903	0.124669	0.223708	0.154456	1	CCL20
GO:0042423	catecholamine biosynthetic process	1/114	22/18903	0.124669	0.223708	0.154456	1	TGFB2
GO:0044062	regulation of excretion	1/114	22/18903	0.124669	0.223708	0.154456	1	EDN1
GO:0044154	histone H3-K14 acetylation	1/114	22/18903	0.124669	0.223708	0.154456	1	PIWIL2
GO:0044321	response to leptin	1/114	22/18903	0.124669	0.223708	0.154456	1	EDN1
GO:0046128	purine ribonucleoside metabolic process	1/114	22/18903	0.124669	0.223708	0.154456	1	NT5E
GO:0046597	negative regulation of viral entry into host cell	1/114	22/18903	0.124669	0.223708	0.154456	1	PTX3
GO:0051151	negative regulation of smooth muscle cell differentiation	1/114	22/18903	0.124669	0.223708	0.154456	1	EREG
GO:0051767	nitric-oxide synthase biosynthetic process	1/114	22/18903	0.124669	0.223708	0.154456	1	EDN1
GO:0051769	regulation of nitric-oxide synthase biosynthetic process	1/114	22/18903	0.124669	0.223708	0.154456	1	EDN1
GO:0060065	uterus development	1/114	22/18903	0.124669	0.223708	0.154456	1	TGFB2
GO:0061042	vascular wound healing	1/114	22/18903	0.124669	0.223708	0.154456	1	SERPINE1
GO:0072111	cell proliferation involved in kidney development	1/114	22/18903	0.124669	0.223708	0.154456	1	ITGB3
GO:0098743	cell aggregation	1/114	22/18903	0.124669	0.223708	0.154456	1	BPIFA1
GO:1903209	positive regulation of oxidative stress-induced cell death	1/114	22/18903	0.124669	0.223708	0.154456	1	MMP3
GO:2000810	regulation of bicellular tight junction assembly	1/114	22/18903	0.124669	0.223708	0.154456	1	SNAI1
GO:2001044	regulation of integrin-mediated signaling pathway	1/114	22/18903	0.124669	0.223708	0.154456	1	TIMP1
GO:0007409	axonogenesis	5/114	438/18903	0.125587	0.225205	0.15549	5	EDN1/FN1/L1CAM/NOG/SEMA3B
GO:0050864	regulation of B cell activation	3/114	204/18903	0.125693	0.225245	0.155517	3	IL4I1/IL6/INHBA
GO:0008630	intrinsic apoptotic signaling pathway in response to DNA damage	2/114	102/18903	0.126169	0.225677	0.155815	2	BCL2A1/SNAI1
GO:0019218	regulation of steroid metabolic process	2/114	102/18903	0.126169	0.225677	0.155815	2	ADM/SNAI1
GO:0072001	renal system development	4/114	318/18903	0.126185	0.225677	0.155815	4	ITGB3/MME/NOG/TGFB2
GO:1901654	response to ketone	3/114	205/18903	0.12703	0.227038	0.156755	3	EDN1/TGFB2/THBS1
GO:0006816	calcium ion transport	5/114	440/18903	0.127333	0.227428	0.157024	5	CATSPER1/EDN1/ITGB3/PDE4B/PTGS2
GO:0061157	mRNA destabilization	2/114	103/18903	0.128183	0.228796	0.157969	2	IGF2BP1/ZFP36
GO:0002285	lymphocyte activation involved in immune response	3/114	207/18903	0.12972	0.22907	0.158158	3	IL6/NLRP3/SLC11A1
GO:0034284	response to monosaccharide	3/114	207/18903	0.12972	0.22907	0.158158	3	PTGS2/PTPRN/THBS1
GO:0048167	regulation of synaptic plasticity	3/114	207/18903	0.12972	0.22907	0.158158	3	MME/NOG/PTGS2
GO:0000966	RNA 5'-end processing	1/114	23/18903	0.129954	0.22907	0.158158	1	PIWIL2
GO:0002363	alpha-beta T cell lineage commitment	1/114	23/18903	0.129954	0.22907	0.158158	1	IL6
GO:0010893	positive regulation of steroid biosynthetic process	1/114	23/18903	0.129954	0.22907	0.158158	1	ADM
GO:0014821	phasic smooth muscle contraction	1/114	23/18903	0.129954	0.22907	0.158158	1	EDN1
GO:0021846	cell proliferation in forebrain	1/114	23/18903	0.129954	0.22907	0.158158	1	IGF2BP1
GO:0036315	cellular response to sterol	1/114	23/18903	0.129954	0.22907	0.158158	1	INHBA
GO:0045591	positive regulation of regulatory T cell differentiation	1/114	23/18903	0.129954	0.22907	0.158158	1	IL4I1
GO:0045624	positive regulation of T-helper cell differentiation	1/114	23/18903	0.129954	0.22907	0.158158	1	NLRP3
GO:0046058	cAMP metabolic process	1/114	23/18903	0.129954	0.22907	0.158158	1	PDE4B
GO:0060444	branching involved in mammary gland duct morphogenesis	1/114	23/18903	0.129954	0.22907	0.158158	1	AREG
GO:0060965	negative regulation of miRNA-mediated gene silencing	1/114	23/18903	0.129954	0.22907	0.158158	1	IL6
GO:0090335	regulation of brown fat cell differentiation	1/114	23/18903	0.129954	0.22907	0.158158	1	PTGS2
GO:0097150	neuronal stem cell population maintenance	1/114	23/18903	0.129954	0.22907	0.158158	1	IGF2BP1
GO:1900120	regulation of receptor binding	1/114	23/18903	0.129954	0.22907	0.158158	1	NOG
GO:1900273	positive regulation of long-term synaptic potentiation	1/114	23/18903	0.129954	0.22907	0.158158	1	MME
GO:0009135	purine nucleoside diphosphate metabolic process	2/114	104/18903	0.130205	0.22907	0.158158	2	NT5E/SLC4A4
GO:0009179	purine ribonucleoside diphosphate metabolic process	2/114	104/18903	0.130205	0.22907	0.158158	2	NT5E/SLC4A4
GO:0046425	regulation of receptor signaling pathway via JAK-STAT	2/114	104/18903	0.130205	0.22907	0.158158	2	IL6/SOCS3
GO:0060291	long-term synaptic potentiation	2/114	104/18903	0.130205	0.22907	0.158158	2	MME/NOG
GO:0045216	cell-cell junction organization	3/114	208/18903	0.131073	0.230446	0.159108	3	IL1B/SNAI1/TGFB2
GO:0007200	phospholipase C-activating G protein-coupled receptor signaling pathway	2/114	105/18903	0.132235	0.232035	0.160205	2	EDN1/FPR2
GO:0032760	positive regulation of tumor necrosis factor production	2/114	105/18903	0.132235	0.232035	0.160205	2	IL6/THBS1
GO:0051588	regulation of neurotransmitter transport	2/114	105/18903	0.132235	0.232035	0.160205	2	ITGB3/SYN1
GO:0140014	mitotic nuclear division	4/114	325/18903	0.133562	0.233454	0.161185	4	DUSP1/EDN1/EREG/IL1B
GO:0007623	circadian rhythm	3/114	210/18903	0.133794	0.233454	0.161185	3	CSF2/PIWIL2/PROK2
GO:0045619	regulation of lymphocyte differentiation	3/114	210/18903	0.133794	0.233454	0.161185	3	IL4I1/INHBA/NLRP3
GO:0042102	positive regulation of T cell proliferation	2/114	106/18903	0.134272	0.233454	0.161185	2	IL1B/IL6
GO:0046394	carboxylic acid biosynthetic process	4/114	326/18903	0.13463	0.233454	0.161185	4	BCAT1/EDN1/IL1B/PTGS2
GO:0002922	positive regulation of humoral immune response	1/114	24/18903	0.135208	0.233454	0.161185	1	IL1B
GO:0010623	programmed cell death involved in cell development	1/114	24/18903	0.135208	0.233454	0.161185	1	IL1B
GO:0034587	piRNA metabolic process	1/114	24/18903	0.135208	0.233454	0.161185	1	PIWIL2
GO:0042430	indole-containing compound metabolic process	1/114	24/18903	0.135208	0.233454	0.161185	1	IL4I1
GO:0042745	circadian sleep/wake cycle	1/114	24/18903	0.135208	0.233454	0.161185	1	CSF2
GO:0043369	CD4-positive or CD8-positive, alpha-beta T cell lineage commitment	1/114	24/18903	0.135208	0.233454	0.161185	1	IL6
GO:0060143	positive regulation of syncytium formation by plasma membrane fusion	1/114	24/18903	0.135208	0.233454	0.161185	1	GDF15
GO:0060149	negative regulation of post-transcriptional gene silencing	1/114	24/18903	0.135208	0.233454	0.161185	1	IL6
GO:0060571	morphogenesis of an epithelial fold	1/114	24/18903	0.135208	0.233454	0.161185	1	NOG
GO:0060706	cell differentiation involved in embryonic placenta development	1/114	24/18903	0.135208	0.233454	0.161185	1	SNAI1
GO:0060967	negative regulation of gene silencing by RNA	1/114	24/18903	0.135208	0.233454	0.161185	1	IL6
GO:0060972	left/right pattern formation	1/114	24/18903	0.135208	0.233454	0.161185	1	SNAI1
GO:0070935	3'-UTR-mediated mRNA stabilization	1/114	24/18903	0.135208	0.233454	0.161185	1	ZFP36
GO:0071676	negative regulation of mononuclear cell migration	1/114	24/18903	0.135208	0.233454	0.161185	1	DUSP1
GO:0120255	olefinic compound biosynthetic process	1/114	24/18903	0.135208	0.233454	0.161185	1	ADM
GO:1900369	negative regulation of post-transcriptional gene silencing by RNA	1/114	24/18903	0.135208	0.233454	0.161185	1	IL6
GO:1902074	response to salt	1/114	24/18903	0.135208	0.233454	0.161185	1	EDN1
GO:2000353	positive regulation of endothelial cell apoptotic process	1/114	24/18903	0.135208	0.233454	0.161185	1	THBS1
GO:2000738	positive regulation of stem cell differentiation	1/114	24/18903	0.135208	0.233454	0.161185	1	TGFB2
GO:2001026	regulation of endothelial cell chemotaxis	1/114	24/18903	0.135208	0.233454	0.161185	1	THBS1
GO:0002027	regulation of heart rate	2/114	107/18903	0.136316	0.234766	0.162091	2	ADM/EDN1
GO:0002444	myeloid leukocyte mediated immunity	2/114	107/18903	0.136316	0.234766	0.162091	2	IL6/TREM1
GO:0050779	RNA destabilization	2/114	107/18903	0.136316	0.234766	0.162091	2	IGF2BP1/ZFP36
GO:0061014	positive regulation of mRNA catabolic process	2/114	107/18903	0.136316	0.234766	0.162091	2	IGF2BP1/ZFP36
GO:1903046	meiotic cell cycle process	3/114	212/18903	0.136534	0.234991	0.162246	3	EDN1/EREG/PIWIL2
GO:0016053	organic acid biosynthetic process	4/114	328/18903	0.136777	0.23526	0.162432	4	BCAT1/EDN1/IL1B/PTGS2
GO:0007631	feeding behavior	2/114	108/18903	0.138367	0.237691	0.164111	2	APLN/GDF15
GO:0051341	regulation of oxidoreductase activity	2/114	108/18903	0.138367	0.237691	0.164111	2	EDN1/IL1B
GO:0051090	regulation of DNA-binding transcription factor activity	5/114	454/18903	0.139862	0.2385	0.164669	5	ADGRG3/EDN1/IL1B/IL6/NLRP3
GO:0046822	regulation of nucleocytoplasmic transport	2/114	109/18903	0.140425	0.2385	0.164669	2	IL1B/PTGS2
GO:1903557	positive regulation of tumor necrosis factor superfamily cytokine production	2/114	109/18903	0.140425	0.2385	0.164669	2	IL6/THBS1
GO:0003148	outflow tract septum morphogenesis	1/114	25/18903	0.14043	0.2385	0.164669	1	TGFB2
GO:0006833	water transport	1/114	25/18903	0.14043	0.2385	0.164669	1	AQP9
GO:0010561	negative regulation of glycoprotein biosynthetic process	1/114	25/18903	0.14043	0.2385	0.164669	1	HBEGF
GO:0045649	regulation of macrophage differentiation	1/114	25/18903	0.14043	0.2385	0.164669	1	INHBA
GO:0045932	negative regulation of muscle contraction	1/114	25/18903	0.14043	0.2385	0.164669	1	PTGS2
GO:0046033	AMP metabolic process	1/114	25/18903	0.14043	0.2385	0.164669	1	NT5E
GO:0046697	decidualization	1/114	25/18903	0.14043	0.2385	0.164669	1	PTGS2
GO:0046885	regulation of hormone biosynthetic process	1/114	25/18903	0.14043	0.2385	0.164669	1	ADM
GO:0050927	positive regulation of positive chemotaxis	1/114	25/18903	0.14043	0.2385	0.164669	1	CXCL8
GO:0051446	positive regulation of meiotic cell cycle	1/114	25/18903	0.14043	0.2385	0.164669	1	PIWIL2
GO:0060396	growth hormone receptor signaling pathway	1/114	25/18903	0.14043	0.2385	0.164669	1	GDF15
GO:0071378	cellular response to growth hormone stimulus	1/114	25/18903	0.14043	0.2385	0.164669	1	GDF15
GO:0072530	purine-containing compound transmembrane transport	1/114	25/18903	0.14043	0.2385	0.164669	1	AQP9
GO:1904996	positive regulation of leukocyte adhesion to vascular endothelial cell	1/114	25/18903	0.14043	0.2385	0.164669	1	IL6
GO:2000209	regulation of anoikis	1/114	25/18903	0.14043	0.2385	0.164669	1	ITGA5
GO:0003012	muscle system process	5/114	455/18903	0.140777	0.238941	0.164973	5	EDN1/IL1B/PDE4B/PROK2/PTGS2
GO:0018209	peptidyl-serine modification	4/114	332/18903	0.141113	0.239359	0.165262	4	IL11/IL6/OSM/PTGS2
GO:0007179	transforming growth factor beta receptor signaling pathway	3/114	216/18903	0.142072	0.240835	0.166281	3	GDF15/TGFB2/THBS1
GO:0007218	neuropeptide signaling pathway	2/114	110/18903	0.142489	0.24139	0.166664	2	GPR84/PROK2
GO:0018958	phenol-containing compound metabolic process	2/114	111/18903	0.14456	0.242881	0.167694	2	TG/TGFB2
GO:0042180	cellular ketone metabolic process	3/114	218/18903	0.144869	0.242881	0.167694	3	ADM/IL1B/PTGS2
GO:0072330	monocarboxylic acid biosynthetic process	3/114	218/18903	0.144869	0.242881	0.167694	3	EDN1/IL1B/PTGS2
GO:0000737	DNA catabolic process, endonucleolytic	1/114	26/18903	0.14562	0.242881	0.167694	1	IL6
GO:0002026	regulation of the force of heart contraction	1/114	26/18903	0.14562	0.242881	0.167694	1	ADM
GO:0006929	substrate-dependent cell migration	1/114	26/18903	0.14562	0.242881	0.167694	1	FN1
GO:0009435	NAD biosynthetic process	1/114	26/18903	0.14562	0.242881	0.167694	1	NNMT
GO:0019883	antigen processing and presentation of endogenous antigen	1/114	26/18903	0.14562	0.242881	0.167694	1	HLA-H
GO:0032925	regulation of activin receptor signaling pathway	1/114	26/18903	0.14562	0.242881	0.167694	1	FSTL3
GO:0033622	integrin activation	1/114	26/18903	0.14562	0.242881	0.167694	1	FN1
GO:0035994	response to muscle stretch	1/114	26/18903	0.14562	0.242881	0.167694	1	EDN1
GO:0045026	plasma membrane fusion	1/114	26/18903	0.14562	0.242881	0.167694	1	FOLR3
GO:0046426	negative regulation of receptor signaling pathway via JAK-STAT	1/114	26/18903	0.14562	0.242881	0.167694	1	SOCS3
GO:0050926	regulation of positive chemotaxis	1/114	26/18903	0.14562	0.242881	0.167694	1	CXCL8
GO:0060384	innervation	1/114	26/18903	0.14562	0.242881	0.167694	1	EDN1
GO:0060740	prostate gland epithelium morphogenesis	1/114	26/18903	0.14562	0.242881	0.167694	1	NOG
GO:0062009	secondary palate development	1/114	26/18903	0.14562	0.242881	0.167694	1	TGFB2
GO:0070102	interleukin-6-mediated signaling pathway	1/114	26/18903	0.14562	0.242881	0.167694	1	IL6
GO:0099590	neurotransmitter receptor internalization	1/114	26/18903	0.14562	0.242881	0.167694	1	ITGB3
GO:1903588	negative regulation of blood vessel endothelial cell proliferation involved in sprouting angiogenesis	1/114	26/18903	0.14562	0.242881	0.167694	1	THBS1
GO:1903798	regulation of miRNA maturation	1/114	26/18903	0.14562	0.242881	0.167694	1	IL6
GO:1903901	negative regulation of viral life cycle	1/114	26/18903	0.14562	0.242881	0.167694	1	PTX3
GO:1904353	regulation of telomere capping	1/114	26/18903	0.14562	0.242881	0.167694	1	PKIB
GO:1905048	regulation of metallopeptidase activity	1/114	26/18903	0.14562	0.242881	0.167694	1	TIMP1
GO:1905523	positive regulation of macrophage migration	1/114	26/18903	0.14562	0.242881	0.167694	1	THBS1
GO:0043473	pigmentation	2/114	112/18903	0.146638	0.244426	0.168761	2	ADAMTSL4/RAB32
GO:0010633	negative regulation of epithelial cell migration	2/114	113/18903	0.148721	0.246209	0.169991	2	PTPRR/THBS1
GO:1905954	positive regulation of lipid localization	2/114	113/18903	0.148721	0.246209	0.169991	2	EDN1/IL1B
GO:0043583	ear development	3/114	221/18903	0.149099	0.246209	0.169991	3	EDN1/NOG/TGFB2
GO:0050866	negative regulation of cell activation	3/114	221/18903	0.149099	0.246209	0.169991	3	CEBPB/IL4I1/INHBA
GO:0001963	synaptic transmission, dopaminergic	1/114	27/18903	0.15078	0.246209	0.169991	1	PTGS2
GO:0002092	positive regulation of receptor internalization	1/114	27/18903	0.15078	0.246209	0.169991	1	APLN
GO:0002418	immune response to tumor cell	1/114	27/18903	0.15078	0.246209	0.169991	1	IL4I1
GO:0002710	negative regulation of T cell mediated immunity	1/114	27/18903	0.15078	0.246209	0.169991	1	IL4I1
GO:0003401	axis elongation	1/114	27/18903	0.15078	0.246209	0.169991	1	AREG
GO:0006817	phosphate ion transport	1/114	27/18903	0.15078	0.246209	0.169991	1	CEBPB
GO:0007205	protein kinase C-activating G protein-coupled receptor signaling pathway	1/114	27/18903	0.15078	0.246209	0.169991	1	EDN1
GO:0009081	branched-chain amino acid metabolic process	1/114	27/18903	0.15078	0.246209	0.169991	1	BCAT1
GO:0014829	vascular associated smooth muscle contraction	1/114	27/18903	0.15078	0.246209	0.169991	1	EDN1
GO:0016540	protein autoprocessing	1/114	27/18903	0.15078	0.246209	0.169991	1	CTSE
GO:0021544	subpallium development	1/114	27/18903	0.15078	0.246209	0.169991	1	INHBA
GO:0030262	apoptotic nuclear changes	1/114	27/18903	0.15078	0.246209	0.169991	1	IL6
GO:0032967	positive regulation of collagen biosynthetic process	1/114	27/18903	0.15078	0.246209	0.169991	1	INHBA
GO:0035929	steroid hormone secretion	1/114	27/18903	0.15078	0.246209	0.169991	1	INHBA
GO:0042278	purine nucleoside metabolic process	1/114	27/18903	0.15078	0.246209	0.169991	1	NT5E
GO:0042403	thyroid hormone metabolic process	1/114	27/18903	0.15078	0.246209	0.169991	1	TG
GO:0042832	defense response to protozoan	1/114	27/18903	0.15078	0.246209	0.169991	1	SLC11A1
GO:0044342	type B pancreatic cell proliferation	1/114	27/18903	0.15078	0.246209	0.169991	1	PTPRN
GO:0045686	negative regulation of glial cell differentiation	1/114	27/18903	0.15078	0.246209	0.169991	1	NOG
GO:0045745	positive regulation of G protein-coupled receptor signaling pathway	1/114	27/18903	0.15078	0.246209	0.169991	1	ITGB3
GO:0048843	negative regulation of axon extension involved in axon guidance	1/114	27/18903	0.15078	0.246209	0.169991	1	SEMA3B
GO:0071880	adenylate cyclase-activating adrenergic receptor signaling pathway	1/114	27/18903	0.15078	0.246209	0.169991	1	PDE4B
GO:0090200	positive regulation of release of cytochrome c from mitochondria	1/114	27/18903	0.15078	0.246209	0.169991	1	PLAUR
GO:1900746	regulation of vascular endothelial growth factor signaling pathway	1/114	27/18903	0.15078	0.246209	0.169991	1	ADAMTS3
GO:1903055	positive regulation of extracellular matrix organization	1/114	27/18903	0.15078	0.246209	0.169991	1	IL6
GO:1905564	positive regulation of vascular endothelial cell proliferation	1/114	27/18903	0.15078	0.246209	0.169991	1	APLN
GO:2000737	negative regulation of stem cell differentiation	1/114	27/18903	0.15078	0.246209	0.169991	1	ZFP36
GO:0009185	ribonucleoside diphosphate metabolic process	2/114	114/18903	0.150811	0.246209	0.169991	2	NT5E/SLC4A4
GO:0009408	response to heat	2/114	114/18903	0.150811	0.246209	0.169991	2	PTGS2/THBS1
GO:0030004	cellular monovalent inorganic cation homeostasis	2/114	114/18903	0.150811	0.246209	0.169991	2	SLC11A1/SLC4A4
GO:0051235	maintenance of location	4/114	342/18903	0.15219	0.248309	0.171442	4	IL1B/IL6/ITGB3/SRGN
GO:0001938	positive regulation of endothelial cell proliferation	2/114	115/18903	0.152907	0.249027	0.171937	2	APLN/ITGB3
GO:0035710	CD4-positive, alpha-beta T cell activation	2/114	115/18903	0.152907	0.249027	0.171937	2	IL6/NLRP3
GO:1904892	regulation of receptor signaling pathway via STAT	2/114	115/18903	0.152907	0.249027	0.171937	2	IL6/SOCS3
GO:0002065	columnar/cuboidal epithelial cell differentiation	2/114	116/18903	0.155008	0.250737	0.173118	2	CEBPB/SERPINE1
GO:0098586	cellular response to virus	2/114	116/18903	0.155008	0.250737	0.173118	2	IL6/NLRP3
GO:0070588	calcium ion transmembrane transport	4/114	345/18903	0.155576	0.250737	0.173118	4	CATSPER1/EDN1/ITGB3/PDE4B
GO:0001562	response to protozoan	1/114	28/18903	0.155909	0.250737	0.173118	1	SLC11A1
GO:0010714	positive regulation of collagen metabolic process	1/114	28/18903	0.155909	0.250737	0.173118	1	INHBA
GO:0010758	regulation of macrophage chemotaxis	1/114	28/18903	0.155909	0.250737	0.173118	1	THBS1
GO:0010894	negative regulation of steroid biosynthetic process	1/114	28/18903	0.155909	0.250737	0.173118	1	SNAI1
GO:0019359	nicotinamide nucleotide biosynthetic process	1/114	28/18903	0.155909	0.250737	0.173118	1	NNMT
GO:0019363	pyridine nucleotide biosynthetic process	1/114	28/18903	0.155909	0.250737	0.173118	1	NNMT
GO:0032703	negative regulation of interleukin-2 production	1/114	28/18903	0.155909	0.250737	0.173118	1	ZFP36
GO:0035640	exploration behavior	1/114	28/18903	0.155909	0.250737	0.173118	1	NOG
GO:0042634	regulation of hair cycle	1/114	28/18903	0.155909	0.250737	0.173118	1	TGFB2
GO:0050996	positive regulation of lipid catabolic process	1/114	28/18903	0.155909	0.250737	0.173118	1	IL1B
GO:0060512	prostate gland morphogenesis	1/114	28/18903	0.155909	0.250737	0.173118	1	NOG
GO:0070723	response to cholesterol	1/114	28/18903	0.155909	0.250737	0.173118	1	INHBA
GO:0070920	regulation of production of small RNA involved in gene silencing by RNA	1/114	28/18903	0.155909	0.250737	0.173118	1	IL6
GO:0090382	phagosome maturation	1/114	28/18903	0.155909	0.250737	0.173118	1	RAB32
GO:1900017	positive regulation of cytokine production involved in inflammatory response	1/114	28/18903	0.155909	0.250737	0.173118	1	IL6
GO:1903671	negative regulation of sprouting angiogenesis	1/114	28/18903	0.155909	0.250737	0.173118	1	THBS1
GO:1903672	positive regulation of sprouting angiogenesis	1/114	28/18903	0.155909	0.250737	0.173118	1	ITGA5
GO:1904385	cellular response to angiotensin	1/114	28/18903	0.155909	0.250737	0.173118	1	INHBA
GO:0021782	glial cell development	2/114	117/18903	0.157115	0.252076	0.174042	2	IL1B/IL6
GO:0045582	positive regulation of T cell differentiation	2/114	117/18903	0.157115	0.252076	0.174042	2	IL4I1/NLRP3
GO:0046632	alpha-beta T cell differentiation	2/114	117/18903	0.157115	0.252076	0.174042	2	IL6/NLRP3
GO:0071887	leukocyte apoptotic process	2/114	117/18903	0.157115	0.252076	0.174042	2	HCAR2/IL6
GO:0007517	muscle organ development	4/114	348/18903	0.158991	0.254707	0.175859	4	DNER/HBEGF/NOG/TGFB2
GO:0030326	embryonic limb morphogenesis	2/114	118/18903	0.159228	0.254707	0.175859	2	NOG/TGFB2
GO:0035113	embryonic appendage morphogenesis	2/114	118/18903	0.159228	0.254707	0.175859	2	NOG/TGFB2
GO:0043200	response to amino acid	2/114	118/18903	0.159228	0.254707	0.175859	2	CEBPB/EDN1
GO:0050830	defense response to Gram-positive bacterium	2/114	118/18903	0.159228	0.254707	0.175859	2	IL1B/IL6
GO:0071902	positive regulation of protein serine/threonine kinase activity	3/114	229/18903	0.160571	0.255133	0.176153	3	EDN1/IL1B/THBS1
GO:0001773	myeloid dendritic cell activation	1/114	29/18903	0.161007	0.255133	0.176153	1	CSF2
GO:0006359	regulation of transcription by RNA polymerase III	1/114	29/18903	0.161007	0.255133	0.176153	1	INHBA
GO:0006921	cellular component disassembly involved in execution phase of apoptosis	1/114	29/18903	0.161007	0.255133	0.176153	1	IL6
GO:0007263	nitric oxide mediated signal transduction	1/114	29/18903	0.161007	0.255133	0.176153	1	THBS1
GO:0010528	regulation of transposition	1/114	29/18903	0.161007	0.255133	0.176153	1	PIWIL2
GO:0010529	negative regulation of transposition	1/114	29/18903	0.161007	0.255133	0.176153	1	PIWIL2
GO:0015701	bicarbonate transport	1/114	29/18903	0.161007	0.255133	0.176153	1	SLC4A4
GO:0030431	sleep	1/114	29/18903	0.161007	0.255133	0.176153	1	CSF2
GO:0048265	response to pain	1/114	29/18903	0.161007	0.255133	0.176153	1	THBS1
GO:0051873	killing by host of symbiont cells	1/114	29/18903	0.161007	0.255133	0.176153	1	TREM1
GO:0072012	glomerulus vasculature development	1/114	29/18903	0.161007	0.255133	0.176153	1	ITGB3
GO:0090312	positive regulation of protein deacetylation	1/114	29/18903	0.161007	0.255133	0.176153	1	NNMT
GO:0097254	renal tubular secretion	1/114	29/18903	0.161007	0.255133	0.176153	1	EDN1
GO:1902547	regulation of cellular response to vascular endothelial growth factor stimulus	1/114	29/18903	0.161007	0.255133	0.176153	1	ADAMTS3
GO:2000765	regulation of cytoplasmic translation	1/114	29/18903	0.161007	0.255133	0.176153	1	IGF2BP1
GO:0006936	muscle contraction	4/114	351/18903	0.162434	0.257244	0.17761	4	EDN1/PDE4B/PROK2/PTGS2
GO:0042752	regulation of circadian rhythm	2/114	120/18903	0.163469	0.258729	0.178636	2	CSF2/PIWIL2
GO:0000280	nuclear division	5/114	481/18903	0.165479	0.259804	0.179378	5	DUSP1/EDN1/EREG/IL1B/PIWIL2
GO:0032355	response to estradiol	2/114	121/18903	0.165597	0.259804	0.179378	2	AREG/PTGS2
GO:0001975	response to amphetamine	1/114	30/18903	0.166074	0.259804	0.179378	1	EDN1
GO:0002360	T cell lineage commitment	1/114	30/18903	0.166074	0.259804	0.179378	1	IL6
GO:0002474	antigen processing and presentation of peptide antigen via MHC class I	1/114	30/18903	0.166074	0.259804	0.179378	1	HLA-H
GO:0008045	motor neuron axon guidance	1/114	30/18903	0.166074	0.259804	0.179378	1	NOG
GO:0008209	androgen metabolic process	1/114	30/18903	0.166074	0.259804	0.179378	1	ADM
GO:0009072	aromatic amino acid family metabolic process	1/114	30/18903	0.166074	0.259804	0.179378	1	IL4I1
GO:0039694	viral RNA genome replication	1/114	30/18903	0.166074	0.259804	0.179378	1	CXCL8
GO:0043032	positive regulation of macrophage activation	1/114	30/18903	0.166074	0.259804	0.179378	1	THBS1
GO:0045940	positive regulation of steroid metabolic process	1/114	30/18903	0.166074	0.259804	0.179378	1	ADM
GO:0060142	regulation of syncytium formation by plasma membrane fusion	1/114	30/18903	0.166074	0.259804	0.179378	1	GDF15
GO:0060295	regulation of cilium movement involved in cell motility	1/114	30/18903	0.166074	0.259804	0.179378	1	CATSPER1
GO:0060325	face morphogenesis	1/114	30/18903	0.166074	0.259804	0.179378	1	NOG
GO:0070168	negative regulation of biomineral tissue development	1/114	30/18903	0.166074	0.259804	0.179378	1	SRGN
GO:0072539	T-helper 17 cell differentiation	1/114	30/18903	0.166074	0.259804	0.179378	1	IL6
GO:0090330	regulation of platelet aggregation	1/114	30/18903	0.166074	0.259804	0.179378	1	IL6
GO:1902019	regulation of cilium-dependent cell motility	1/114	30/18903	0.166074	0.259804	0.179378	1	CATSPER1
GO:1902230	negative regulation of intrinsic apoptotic signaling pathway in response to DNA damage	1/114	30/18903	0.166074	0.259804	0.179378	1	SNAI1
GO:2000108	positive regulation of leukocyte apoptotic process	1/114	30/18903	0.166074	0.259804	0.179378	1	HCAR2
GO:0002698	negative regulation of immune effector process	2/114	122/18903	0.16773	0.261938	0.180852	2	IL4I1/TGFB2
GO:0008286	insulin receptor signaling pathway	2/114	122/18903	0.16773	0.261938	0.180852	2	IL1B/SOCS3
GO:0043500	muscle adaptation	2/114	122/18903	0.16773	0.261938	0.180852	2	EDN1/IL1B
GO:0016311	dephosphorylation	4/114	357/18903	0.169402	0.26416	0.182386	4	DUSP1/DUSP6/PTPRR/TGFB2
GO:0001916	positive regulation of T cell mediated cytotoxicity	1/114	31/18903	0.171112	0.26416	0.182386	1	HLA-H
GO:0002313	mature B cell differentiation involved in immune response	1/114	31/18903	0.171112	0.26416	0.182386	1	IL6
GO:0003298	physiological muscle hypertrophy	1/114	31/18903	0.171112	0.26416	0.182386	1	EDN1
GO:0003301	physiological cardiac muscle hypertrophy	1/114	31/18903	0.171112	0.26416	0.182386	1	EDN1
GO:0015721	bile acid and bile salt transport	1/114	31/18903	0.171112	0.26416	0.182386	1	AQP9
GO:0017145	stem cell division	1/114	31/18903	0.171112	0.26416	0.182386	1	TGFB2
GO:0034694	response to prostaglandin	1/114	31/18903	0.171112	0.26416	0.182386	1	EDN1
GO:0035767	endothelial cell chemotaxis	1/114	31/18903	0.171112	0.26416	0.182386	1	THBS1
GO:0045939	negative regulation of steroid metabolic process	1/114	31/18903	0.171112	0.26416	0.182386	1	SNAI1
GO:0055022	negative regulation of cardiac muscle tissue growth	1/114	31/18903	0.171112	0.26416	0.182386	1	NOG
GO:0060603	mammary gland duct morphogenesis	1/114	31/18903	0.171112	0.26416	0.182386	1	AREG
GO:0061049	cell growth involved in cardiac muscle cell development	1/114	31/18903	0.171112	0.26416	0.182386	1	EDN1
GO:0061117	negative regulation of heart growth	1/114	31/18903	0.171112	0.26416	0.182386	1	NOG
GO:0061437	renal system vasculature development	1/114	31/18903	0.171112	0.26416	0.182386	1	ITGB3
GO:0061440	kidney vasculature development	1/114	31/18903	0.171112	0.26416	0.182386	1	ITGB3
GO:0072525	pyridine-containing compound biosynthetic process	1/114	31/18903	0.171112	0.26416	0.182386	1	NNMT
GO:0110150	negative regulation of biomineralization	1/114	31/18903	0.171112	0.26416	0.182386	1	SRGN
GO:0140058	neuron projection arborization	1/114	31/18903	0.171112	0.26416	0.182386	1	IGF2BP1
GO:1900745	positive regulation of p38MAPK cascade	1/114	31/18903	0.171112	0.26416	0.182386	1	IL1B
GO:0042471	ear morphogenesis	2/114	124/18903	0.17201	0.265396	0.183239	2	EDN1/NOG
GO:0001655	urogenital system development	4/114	360/18903	0.172926	0.266655	0.184108	4	ITGB3/MME/NOG/TGFB2
GO:0002831	regulation of response to biotic stimulus	4/114	361/18903	0.174106	0.268095	0.185102	4	EREG/FPR2/IL1B/IL4I1
GO:0000956	nuclear-transcribed mRNA catabolic process	2/114	125/18903	0.174157	0.268095	0.185102	2	IGF2BP1/ZFP36
GO:0043280	positive regulation of cysteine-type endopeptidase activity involved in apoptotic process	2/114	125/18903	0.174157	0.268095	0.185102	2	CCN1/NLRP3
GO:0061564	axon development	5/114	490/18903	0.174414	0.268337	0.185269	5	EDN1/FN1/L1CAM/NOG/SEMA3B
GO:0003180	aortic valve morphogenesis	1/114	32/18903	0.176119	0.269423	0.186019	1	SNAI1
GO:0006308	DNA catabolic process	1/114	32/18903	0.176119	0.269423	0.186019	1	IL6
GO:0032770	positive regulation of monooxygenase activity	1/114	32/18903	0.176119	0.269423	0.186019	1	IL1B
GO:0034390	smooth muscle cell apoptotic process	1/114	32/18903	0.176119	0.269423	0.186019	1	EDN1
GO:0034391	regulation of smooth muscle cell apoptotic process	1/114	32/18903	0.176119	0.269423	0.186019	1	EDN1
GO:0040020	regulation of meiotic nuclear division	1/114	32/18903	0.176119	0.269423	0.186019	1	PIWIL2
GO:0046825	regulation of protein export from nucleus	1/114	32/18903	0.176119	0.269423	0.186019	1	IL1B
GO:0051482	positive regulation of cytosolic calcium ion concentration involved in phospholipase C-activating G protein-coupled signaling pathway	1/114	32/18903	0.176119	0.269423	0.186019	1	EDN1
GO:0061036	positive regulation of cartilage development	1/114	32/18903	0.176119	0.269423	0.186019	1	CCN1
GO:0061037	negative regulation of cartilage development	1/114	32/18903	0.176119	0.269423	0.186019	1	NOG
GO:0048738	cardiac muscle tissue development	3/114	241/18903	0.178261	0.272546	0.188175	3	EDN1/NOG/TGFB2
GO:0030218	erythrocyte differentiation	2/114	128/18903	0.180625	0.274545	0.189556	2	INHBA/ZFP36
GO:0050868	negative regulation of T cell activation	2/114	128/18903	0.180625	0.274545	0.189556	2	CEBPB/IL4I1
GO:0007035	vacuolar acidification	1/114	33/18903	0.181096	0.274545	0.189556	1	SLC11A1
GO:0007143	female meiotic nuclear division	1/114	33/18903	0.181096	0.274545	0.189556	1	EREG
GO:0030511	positive regulation of transforming growth factor beta receptor signaling pathway	1/114	33/18903	0.181096	0.274545	0.189556	1	THBS1
GO:0032196	transposition	1/114	33/18903	0.181096	0.274545	0.189556	1	PIWIL2
GO:0033032	regulation of myeloid cell apoptotic process	1/114	33/18903	0.181096	0.274545	0.189556	1	HCAR2
GO:0036314	response to sterol	1/114	33/18903	0.181096	0.274545	0.189556	1	INHBA
GO:0048841	regulation of axon extension involved in axon guidance	1/114	33/18903	0.181096	0.274545	0.189556	1	SEMA3B
GO:0051968	positive regulation of synaptic transmission, glutamatergic	1/114	33/18903	0.181096	0.274545	0.189556	1	PTGS2
GO:0071875	adrenergic receptor signaling pathway	1/114	33/18903	0.181096	0.274545	0.189556	1	PDE4B
GO:0090183	regulation of kidney development	1/114	33/18903	0.181096	0.274545	0.189556	1	NOG
GO:0098801	regulation of renal system process	1/114	33/18903	0.181096	0.274545	0.189556	1	EDN1
GO:1903846	positive regulation of cellular response to transforming growth factor beta stimulus	1/114	33/18903	0.181096	0.274545	0.189556	1	THBS1
GO:1904893	negative regulation of receptor signaling pathway via STAT	1/114	33/18903	0.181096	0.274545	0.189556	1	SOCS3
GO:0032535	regulation of cellular component size	4/114	367/18903	0.181246	0.274618	0.189606	4	EDN1/FN1/L1CAM/SEMA3B
GO:0014902	myotube differentiation	2/114	129/18903	0.182789	0.2768	0.191113	2	DNER/GDF15
GO:0032874	positive regulation of stress-activated MAPK cascade	2/114	130/18903	0.184957	0.279375	0.192891	2	IL1B/TGFB2
GO:0045621	positive regulation of lymphocyte differentiation	2/114	130/18903	0.184957	0.279375	0.192891	2	IL4I1/NLRP3
GO:0051028	mRNA transport	2/114	130/18903	0.184957	0.279375	0.192891	2	IGF2BP1/ZFP36
GO:0000289	nuclear-transcribed mRNA poly(A) tail shortening	1/114	34/18903	0.186043	0.279375	0.192891	1	ZFP36
GO:0002021	response to dietary excess	1/114	34/18903	0.186043	0.279375	0.192891	1	GDF15
GO:0032212	positive regulation of telomere maintenance via telomerase	1/114	34/18903	0.186043	0.279375	0.192891	1	PKIB
GO:0033238	regulation of cellular amine metabolic process	1/114	34/18903	0.186043	0.279375	0.192891	1	NNMT
GO:0035066	positive regulation of histone acetylation	1/114	34/18903	0.186043	0.279375	0.192891	1	PIWIL2
GO:0045648	positive regulation of erythrocyte differentiation	1/114	34/18903	0.186043	0.279375	0.192891	1	INHBA
GO:0051973	positive regulation of telomerase activity	1/114	34/18903	0.186043	0.279375	0.192891	1	PKIB
GO:0086004	regulation of cardiac muscle cell contraction	1/114	34/18903	0.186043	0.279375	0.192891	1	PDE4B
GO:0090322	regulation of superoxide metabolic process	1/114	34/18903	0.186043	0.279375	0.192891	1	FPR2
GO:0110110	positive regulation of animal organ morphogenesis	1/114	34/18903	0.186043	0.279375	0.192891	1	EDN1
GO:1901797	negative regulation of signal transduction by p53 class mediator	1/114	34/18903	0.186043	0.279375	0.192891	1	SNAI1
GO:1905207	regulation of cardiocyte differentiation	1/114	34/18903	0.186043	0.279375	0.192891	1	TGFB2
GO:0006402	mRNA catabolic process	3/114	248/18903	0.188821	0.283389	0.195662	3	IGF2BP1/SLC11A1/ZFP36
GO:0009132	nucleoside diphosphate metabolic process	2/114	132/18903	0.189304	0.28364	0.195835	2	NT5E/SLC4A4
GO:0048565	digestive tract development	2/114	132/18903	0.189304	0.28364	0.195835	2	CXCL8/TGFB2
GO:0070304	positive regulation of stress-activated protein kinase signaling cascade	2/114	132/18903	0.189304	0.28364	0.195835	2	IL1B/TGFB2
GO:0001893	maternal placenta development	1/114	35/18903	0.190961	0.284857	0.196675	1	PTGS2
GO:0002719	negative regulation of cytokine production involved in immune response	1/114	35/18903	0.190961	0.284857	0.196675	1	TGFB2
GO:0010737	protein kinase A signaling	1/114	35/18903	0.190961	0.284857	0.196675	1	EDN1
GO:0043276	anoikis	1/114	35/18903	0.190961	0.284857	0.196675	1	ITGA5
GO:0043372	positive regulation of CD4-positive, alpha-beta T cell differentiation	1/114	35/18903	0.190961	0.284857	0.196675	1	NLRP3
GO:0071398	cellular response to fatty acid	1/114	35/18903	0.190961	0.284857	0.196675	1	EDN1
GO:0090050	positive regulation of cell migration involved in sprouting angiogenesis	1/114	35/18903	0.190961	0.284857	0.196675	1	PTGS2
GO:0090075	relaxation of muscle	1/114	35/18903	0.190961	0.284857	0.196675	1	PDE4B
GO:0001101	response to acid chemical	2/114	133/18903	0.191482	0.285477	0.197104	2	CEBPB/EDN1
GO:0001909	leukocyte mediated cytotoxicity	2/114	134/18903	0.193665	0.288571	0.19924	2	HLA-H/TREM1
GO:0001569	branching involved in blood vessel morphogenesis	1/114	36/18903	0.195849	0.28911	0.199612	1	EDN1
GO:0009119	ribonucleoside metabolic process	1/114	36/18903	0.195849	0.28911	0.199612	1	NT5E
GO:0010613	positive regulation of cardiac muscle hypertrophy	1/114	36/18903	0.195849	0.28911	0.199612	1	EDN1
GO:0019934	cGMP-mediated signaling	1/114	36/18903	0.195849	0.28911	0.199612	1	THBS1
GO:0030224	monocyte differentiation	1/114	36/18903	0.195849	0.28911	0.199612	1	CSF2
GO:0031646	positive regulation of nervous system process	1/114	36/18903	0.195849	0.28911	0.199612	1	ITGAX
GO:0033280	response to vitamin D	1/114	36/18903	0.195849	0.28911	0.199612	1	PTGS2
GO:0035909	aorta morphogenesis	1/114	36/18903	0.195849	0.28911	0.199612	1	TGFB2
GO:0045589	regulation of regulatory T cell differentiation	1/114	36/18903	0.195849	0.28911	0.199612	1	IL4I1
GO:0048261	negative regulation of receptor-mediated endocytosis	1/114	36/18903	0.195849	0.28911	0.199612	1	ITGB3
GO:0050869	negative regulation of B cell activation	1/114	36/18903	0.195849	0.28911	0.199612	1	INHBA
GO:0051930	regulation of sensory perception of pain	1/114	36/18903	0.195849	0.28911	0.199612	1	EDN1
GO:0051931	regulation of sensory perception	1/114	36/18903	0.195849	0.28911	0.199612	1	EDN1
GO:0060323	head morphogenesis	1/114	36/18903	0.195849	0.28911	0.199612	1	NOG
GO:0071711	basement membrane organization	1/114	36/18903	0.195849	0.28911	0.199612	1	NTN4
GO:0098810	neurotransmitter reuptake	1/114	36/18903	0.195849	0.28911	0.199612	1	ITGB3
GO:1903580	positive regulation of ATP metabolic process	1/114	36/18903	0.195849	0.28911	0.199612	1	SLC4A4
GO:0034101	erythrocyte homeostasis	2/114	137/18903	0.20023	0.29387	0.202899	2	INHBA/ZFP36
GO:0002335	mature B cell differentiation	1/114	37/18903	0.200708	0.29387	0.202899	1	IL6
GO:0003176	aortic valve development	1/114	37/18903	0.200708	0.29387	0.202899	1	SNAI1
GO:0007588	excretion	1/114	37/18903	0.200708	0.29387	0.202899	1	EDN1
GO:0008207	C21-steroid hormone metabolic process	1/114	37/18903	0.200708	0.29387	0.202899	1	ADM
GO:0010923	negative regulation of phosphatase activity	1/114	37/18903	0.200708	0.29387	0.202899	1	TGFB2
GO:0010934	macrophage cytokine production	1/114	37/18903	0.200708	0.29387	0.202899	1	TGFB2
GO:0010935	regulation of macrophage cytokine production	1/114	37/18903	0.200708	0.29387	0.202899	1	TGFB2
GO:0014742	positive regulation of muscle hypertrophy	1/114	37/18903	0.200708	0.29387	0.202899	1	EDN1
GO:0048846	axon extension involved in axon guidance	1/114	37/18903	0.200708	0.29387	0.202899	1	SEMA3B
GO:0051385	response to mineralocorticoid	1/114	37/18903	0.200708	0.29387	0.202899	1	EDN1
GO:0055023	positive regulation of cardiac muscle tissue growth	1/114	37/18903	0.200708	0.29387	0.202899	1	EDN1
GO:0060416	response to growth hormone	1/114	37/18903	0.200708	0.29387	0.202899	1	GDF15
GO:1902284	neuron projection extension involved in neuron projection guidance	1/114	37/18903	0.200708	0.29387	0.202899	1	SEMA3B
GO:1904358	positive regulation of telomere maintenance via telomere lengthening	1/114	37/18903	0.200708	0.29387	0.202899	1	PKIB
GO:0014706	striated muscle tissue development	3/114	257/18903	0.202629	0.296522	0.204729	3	EDN1/NOG/TGFB2
GO:0017148	negative regulation of translation	3/114	258/18903	0.204178	0.298627	0.206183	3	C8orf88/IGF2BP1/ZFP36
GO:0003158	endothelium development	2/114	139/18903	0.204623	0.299115	0.20652	2	IL1B/ITGAX
GO:0030851	granulocyte differentiation	1/114	38/18903	0.205538	0.299317	0.206659	1	CSF2
GO:0043368	positive T cell selection	1/114	38/18903	0.205538	0.299317	0.206659	1	IL6
GO:0043516	regulation of DNA damage response, signal transduction by p53 class mediator	1/114	38/18903	0.205538	0.299317	0.206659	1	SNAI1
GO:0045746	negative regulation of Notch signaling pathway	1/114	38/18903	0.205538	0.299317	0.206659	1	MAGEA1
GO:0048741	skeletal muscle fiber development	1/114	38/18903	0.205538	0.299317	0.206659	1	DNER
GO:0140448	signaling receptor ligand precursor processing	1/114	38/18903	0.205538	0.299317	0.206659	1	MME
GO:1902229	regulation of intrinsic apoptotic signaling pathway in response to DNA damage	1/114	38/18903	0.205538	0.299317	0.206659	1	SNAI1
GO:0042157	lipoprotein metabolic process	2/114	140/18903	0.206823	0.300864	0.207727	2	ITGB3/OLR1
GO:1903313	positive regulation of mRNA metabolic process	2/114	140/18903	0.206823	0.300864	0.207727	2	IGF2BP1/ZFP36
GO:0006470	protein dephosphorylation	3/114	261/18903	0.208842	0.303198	0.209339	3	DUSP1/DUSP6/PTPRR
GO:0034976	response to endoplasmic reticulum stress	3/114	261/18903	0.208842	0.303198	0.209339	3	CEBPB/CXCL8/THBS1
GO:0034754	cellular hormone metabolic process	2/114	141/18903	0.209026	0.303198	0.209339	2	ADM/IL4I1
GO:0001990	regulation of systemic arterial blood pressure by hormone	1/114	39/18903	0.210339	0.303198	0.209339	1	EDN1
GO:0009595	detection of biotic stimulus	1/114	39/18903	0.210339	0.303198	0.209339	1	NLRP3
GO:0030279	negative regulation of ossification	1/114	39/18903	0.210339	0.303198	0.209339	1	SRGN
GO:0032350	regulation of hormone metabolic process	1/114	39/18903	0.210339	0.303198	0.209339	1	ADM
GO:0032438	melanosome organization	1/114	39/18903	0.210339	0.303198	0.209339	1	RAB32
GO:0042755	eating behavior	1/114	39/18903	0.210339	0.303198	0.209339	1	GDF15
GO:0043618	regulation of transcription from RNA polymerase II promoter in response to stress	1/114	39/18903	0.210339	0.303198	0.209339	1	CEBPB
GO:0044060	regulation of endocrine process	1/114	39/18903	0.210339	0.303198	0.209339	1	INHBA
GO:0045066	regulatory T cell differentiation	1/114	39/18903	0.210339	0.303198	0.209339	1	IL4I1
GO:0045616	regulation of keratinocyte differentiation	1/114	39/18903	0.210339	0.303198	0.209339	1	ZFP36
GO:0045730	respiratory burst	1/114	39/18903	0.210339	0.303198	0.209339	1	SLC11A1
GO:0046621	negative regulation of organ growth	1/114	39/18903	0.210339	0.303198	0.209339	1	NOG
GO:0051569	regulation of histone H3-K4 methylation	1/114	39/18903	0.210339	0.303198	0.209339	1	NNMT
GO:0097242	amyloid-beta clearance	1/114	39/18903	0.210339	0.303198	0.209339	1	MME
GO:0035107	appendage morphogenesis	2/114	142/18903	0.211231	0.303835	0.209778	2	NOG/TGFB2
GO:0035108	limb morphogenesis	2/114	142/18903	0.211231	0.303835	0.209778	2	NOG/TGFB2
GO:0042552	myelination	2/114	142/18903	0.211231	0.303835	0.209778	2	ITGAX/TG
GO:1903900	regulation of viral life cycle	2/114	142/18903	0.211231	0.303835	0.209778	2	CXCL8/PTX3
GO:0055123	digestive system development	2/114	143/18903	0.213439	0.306847	0.211858	2	CXCL8/TGFB2
GO:1904062	regulation of cation transmembrane transport	4/114	394/18903	0.214513	0.30696	0.211936	4	BPIFA1/EDN1/ITGB3/PDE4B
GO:0003352	regulation of cilium movement	1/114	40/18903	0.215111	0.30696	0.211936	1	CATSPER1
GO:0009187	cyclic nucleotide metabolic process	1/114	40/18903	0.215111	0.30696	0.211936	1	PDE4B
GO:0016233	telomere capping	1/114	40/18903	0.215111	0.30696	0.211936	1	PKIB
GO:0035886	vascular associated smooth muscle cell differentiation	1/114	40/18903	0.215111	0.30696	0.211936	1	ADM
GO:0042307	positive regulation of protein import into nucleus	1/114	40/18903	0.215111	0.30696	0.211936	1	PTGS2
GO:0045740	positive regulation of DNA replication	1/114	40/18903	0.215111	0.30696	0.211936	1	EREG
GO:0048246	macrophage chemotaxis	1/114	40/18903	0.215111	0.30696	0.211936	1	THBS1
GO:0048753	pigment granule organization	1/114	40/18903	0.215111	0.30696	0.211936	1	RAB32
GO:0140467	integrated stress response signaling	1/114	40/18903	0.215111	0.30696	0.211936	1	CEBPB
GO:1900016	negative regulation of cytokine production involved in inflammatory response	1/114	40/18903	0.215111	0.30696	0.211936	1	MEFV
GO:1903115	regulation of actin filament-based movement	1/114	40/18903	0.215111	0.30696	0.211936	1	PDE4B
GO:1904994	regulation of leukocyte adhesion to vascular endothelial cell	1/114	40/18903	0.215111	0.30696	0.211936	1	IL6
GO:2000758	positive regulation of peptidyl-lysine acetylation	1/114	40/18903	0.215111	0.30696	0.211936	1	PIWIL2
GO:0007272	ensheathment of neurons	2/114	144/18903	0.215649	0.307402	0.212241	2	ITGAX/TG
GO:0008366	axon ensheathment	2/114	144/18903	0.215649	0.307402	0.212241	2	ITGAX/TG
GO:0098656	anion transmembrane transport	3/114	266/18903	0.216668	0.308691	0.213132	3	SLC11A1/SLC4A4/SLC7A2
GO:0031644	regulation of nervous system process	2/114	145/18903	0.217861	0.310064	0.214079	2	EDN1/ITGAX
GO:0045089	positive regulation of innate immune response	2/114	145/18903	0.217861	0.310064	0.214079	2	EREG/FPR2
GO:0051924	regulation of calcium ion transport	3/114	268/18903	0.219816	0.311095	0.214791	3	ITGB3/PDE4B/PTGS2
GO:0001914	regulation of T cell mediated cytotoxicity	1/114	41/18903	0.219854	0.311095	0.214791	1	HLA-H
GO:0014912	negative regulation of smooth muscle cell migration	1/114	41/18903	0.219854	0.311095	0.214791	1	SERPINE1
GO:0030513	positive regulation of BMP signaling pathway	1/114	41/18903	0.219854	0.311095	0.214791	1	CCN1
GO:0032733	positive regulation of interleukin-10 production	1/114	41/18903	0.219854	0.311095	0.214791	1	IL6
GO:0042119	neutrophil activation	1/114	41/18903	0.219854	0.311095	0.214791	1	CXCL8
GO:0042417	dopamine metabolic process	1/114	41/18903	0.219854	0.311095	0.214791	1	TGFB2
GO:0045454	cell redox homeostasis	1/114	41/18903	0.219854	0.311095	0.214791	1	SLC11A1
GO:0060421	positive regulation of heart growth	1/114	41/18903	0.219854	0.311095	0.214791	1	EDN1
GO:0070050	neuron cellular homeostasis	1/114	41/18903	0.219854	0.311095	0.214791	1	IL6
GO:0120178	steroid hormone biosynthetic process	1/114	41/18903	0.219854	0.311095	0.214791	1	ADM
GO:0050671	positive regulation of lymphocyte proliferation	2/114	146/18903	0.220075	0.311244	0.214894	2	IL1B/IL6
GO:0032868	response to insulin	3/114	269/18903	0.221393	0.312944	0.216068	3	ADM/IL1B/SOCS3
GO:0008584	male gonad development	2/114	147/18903	0.222291	0.313884	0.216717	2	INHBA/TGFB2
GO:1903038	negative regulation of leukocyte cell-cell adhesion	2/114	147/18903	0.222291	0.313884	0.216717	2	CEBPB/IL4I1
GO:0046546	development of primary male sexual characteristics	2/114	148/18903	0.224509	0.315614	0.217911	2	INHBA/TGFB2
GO:0009167	purine ribonucleoside monophosphate metabolic process	1/114	42/18903	0.224569	0.315614	0.217911	1	NT5E
GO:0010907	positive regulation of glucose metabolic process	1/114	42/18903	0.224569	0.315614	0.217911	1	NNMT
GO:0014904	myotube cell development	1/114	42/18903	0.224569	0.315614	0.217911	1	DNER
GO:0021983	pituitary gland development	1/114	42/18903	0.224569	0.315614	0.217911	1	NOG
GO:0050691	regulation of defense response to virus by host	1/114	42/18903	0.224569	0.315614	0.217911	1	IL1B
GO:0050999	regulation of nitric-oxide synthase activity	1/114	42/18903	0.224569	0.315614	0.217911	1	IL1B
GO:0071354	cellular response to interleukin-6	1/114	42/18903	0.224569	0.315614	0.217911	1	IL6
GO:0090051	negative regulation of cell migration involved in sprouting angiogenesis	1/114	42/18903	0.224569	0.315614	0.217911	1	THBS1
GO:0032946	positive regulation of mononuclear cell proliferation	2/114	149/18903	0.226729	0.318317	0.219778	2	IL1B/IL6
GO:0050796	regulation of insulin secretion	2/114	149/18903	0.226729	0.318317	0.219778	2	IL1B/IL6
GO:0007612	learning	2/114	150/18903	0.22895	0.319537	0.22062	2	NOG/PTGS2
GO:0034614	cellular response to reactive oxygen species	2/114	150/18903	0.22895	0.319537	0.22062	2	EDN1/IL6
GO:0043535	regulation of blood vessel endothelial cell migration	2/114	150/18903	0.22895	0.319537	0.22062	2	PTGS2/THBS1
GO:0002251	organ or tissue specific immune response	1/114	43/18903	0.229256	0.319537	0.22062	1	IL6
GO:0002347	response to tumor cell	1/114	43/18903	0.229256	0.319537	0.22062	1	IL4I1
GO:0007595	lactation	1/114	43/18903	0.229256	0.319537	0.22062	1	APLN
GO:0016266	O-glycan processing	1/114	43/18903	0.229256	0.319537	0.22062	1	GALNT15
GO:0016339	calcium-dependent cell-cell adhesion via plasma membrane cell adhesion molecules	1/114	43/18903	0.229256	0.319537	0.22062	1	PCDHB9
GO:0021879	forebrain neuron differentiation	1/114	43/18903	0.229256	0.319537	0.22062	1	INHBA
GO:0043507	positive regulation of JUN kinase activity	1/114	43/18903	0.229256	0.319537	0.22062	1	EDN1
GO:0045622	regulation of T-helper cell differentiation	1/114	43/18903	0.229256	0.319537	0.22062	1	NLRP3
GO:0051150	regulation of smooth muscle cell differentiation	1/114	43/18903	0.229256	0.319537	0.22062	1	EREG
GO:0071364	cellular response to epidermal growth factor stimulus	1/114	43/18903	0.229256	0.319537	0.22062	1	ZFP36
GO:0071548	response to dexamethasone	1/114	43/18903	0.229256	0.319537	0.22062	1	EDN1
GO:0001894	tissue homeostasis	3/114	275/18903	0.230907	0.321671	0.222093	3	IL6/ITGB3/PTGS2
GO:0071456	cellular response to hypoxia	2/114	151/18903	0.231173	0.321876	0.222235	2	EDN1/PTGS2
GO:0007043	cell-cell junction assembly	2/114	152/18903	0.233398	0.323688	0.223486	2	IL1B/SNAI1
GO:0072006	nephron development	2/114	152/18903	0.233398	0.323688	0.223486	2	ITGB3/NOG
GO:0001504	neurotransmitter uptake	1/114	44/18903	0.233915	0.323688	0.223486	1	ITGB3
GO:0009126	purine nucleoside monophosphate metabolic process	1/114	44/18903	0.233915	0.323688	0.223486	1	NT5E
GO:0014014	negative regulation of gliogenesis	1/114	44/18903	0.233915	0.323688	0.223486	1	NOG
GO:0014075	response to amine	1/114	44/18903	0.233915	0.323688	0.223486	1	EDN1
GO:0032689	negative regulation of interferon-gamma production	1/114	44/18903	0.233915	0.323688	0.223486	1	INHBA
GO:0042181	ketone biosynthetic process	1/114	44/18903	0.233915	0.323688	0.223486	1	ADM
GO:0045214	sarcomere organization	1/114	44/18903	0.233915	0.323688	0.223486	1	EDN1
GO:0072538	T-helper 17 type immune response	1/114	44/18903	0.233915	0.323688	0.223486	1	IL6
GO:1904706	negative regulation of vascular associated smooth muscle cell proliferation	1/114	44/18903	0.233915	0.323688	0.223486	1	APLN
GO:1905521	regulation of macrophage migration	1/114	44/18903	0.233915	0.323688	0.223486	1	THBS1
GO:0034763	negative regulation of transmembrane transport	2/114	154/18903	0.23785	0.328077	0.226516	2	IL1B/THBS1
GO:0051092	positive regulation of NF-kappaB transcription factor activity	2/114	154/18903	0.23785	0.328077	0.226516	2	IL1B/NLRP3
GO:0006775	fat-soluble vitamin metabolic process	1/114	45/18903	0.238546	0.328077	0.226516	1	SNAI1
GO:0030501	positive regulation of bone mineralization	1/114	45/18903	0.238546	0.328077	0.226516	1	CCN1
GO:0030517	negative regulation of axon extension	1/114	45/18903	0.238546	0.328077	0.226516	1	SEMA3B
GO:0042551	neuron maturation	1/114	45/18903	0.238546	0.328077	0.226516	1	NTN4
GO:0043620	regulation of DNA-templated transcription in response to stress	1/114	45/18903	0.238546	0.328077	0.226516	1	CEBPB
GO:0046427	positive regulation of receptor signaling pathway via JAK-STAT	1/114	45/18903	0.238546	0.328077	0.226516	1	IL6
GO:0048512	circadian behavior	1/114	45/18903	0.238546	0.328077	0.226516	1	CSF2
GO:0070741	response to interleukin-6	1/114	45/18903	0.238546	0.328077	0.226516	1	IL6
GO:1904646	cellular response to amyloid-beta	1/114	45/18903	0.238546	0.328077	0.226516	1	FPR2
GO:2000516	positive regulation of CD4-positive, alpha-beta T cell activation	1/114	45/18903	0.238546	0.328077	0.226516	1	NLRP3
GO:0002920	regulation of humoral immune response	1/114	46/18903	0.243149	0.333049	0.229949	1	IL1B
GO:0007094	mitotic spindle assembly checkpoint signaling	1/114	46/18903	0.243149	0.333049	0.229949	1	DUSP1
GO:0044788	modulation by host of viral process	1/114	46/18903	0.243149	0.333049	0.229949	1	PTX3
GO:0046596	regulation of viral entry into host cell	1/114	46/18903	0.243149	0.333049	0.229949	1	PTX3
GO:0060443	mammary gland morphogenesis	1/114	46/18903	0.243149	0.333049	0.229949	1	AREG
GO:0071173	spindle assembly checkpoint signaling	1/114	46/18903	0.243149	0.333049	0.229949	1	DUSP1
GO:0071174	mitotic spindle checkpoint signaling	1/114	46/18903	0.243149	0.333049	0.229949	1	DUSP1
GO:1900271	regulation of long-term synaptic potentiation	1/114	46/18903	0.243149	0.333049	0.229949	1	MME
GO:0090316	positive regulation of intracellular protein transport	2/114	157/18903	0.244538	0.334781	0.231145	2	IL1B/PTGS2
GO:0034249	negative regulation of cellular amide metabolic process	3/114	285/18903	0.246927	0.336751	0.232505	3	C8orf88/IGF2BP1/ZFP36
GO:0001774	microglial cell activation	1/114	47/18903	0.247725	0.336751	0.232505	1	IL6
GO:0002701	negative regulation of production of molecular mediator of immune response	1/114	47/18903	0.247725	0.336751	0.232505	1	TGFB2
GO:0006110	regulation of glycolytic process	1/114	47/18903	0.247725	0.336751	0.232505	1	SLC4A4
GO:0007622	rhythmic behavior	1/114	47/18903	0.247725	0.336751	0.232505	1	CSF2
GO:0008542	visual learning	1/114	47/18903	0.247725	0.336751	0.232505	1	NOG
GO:0031018	endocrine pancreas development	1/114	47/18903	0.247725	0.336751	0.232505	1	IL6
GO:0031577	spindle checkpoint signaling	1/114	47/18903	0.247725	0.336751	0.232505	1	DUSP1
GO:0036230	granulocyte activation	1/114	47/18903	0.247725	0.336751	0.232505	1	CXCL8
GO:0045601	regulation of endothelial cell differentiation	1/114	47/18903	0.247725	0.336751	0.232505	1	IL1B
GO:0051972	regulation of telomerase activity	1/114	47/18903	0.247725	0.336751	0.232505	1	PKIB
GO:0061647	histone H3-K9 modification	1/114	47/18903	0.247725	0.336751	0.232505	1	PIWIL2
GO:0070849	response to epidermal growth factor	1/114	47/18903	0.247725	0.336751	0.232505	1	ZFP36
GO:0090199	regulation of release of cytochrome c from mitochondria	1/114	47/18903	0.247725	0.336751	0.232505	1	PLAUR
GO:0036294	cellular response to decreased oxygen levels	2/114	159/18903	0.249001	0.338315	0.233585	2	EDN1/PTGS2
GO:0060537	muscle tissue development	4/114	422/18903	0.250644	0.339511	0.23441	4	DNER/EDN1/NOG/TGFB2
GO:0051147	regulation of muscle cell differentiation	2/114	160/18903	0.251234	0.339511	0.23441	2	EDN1/EREG
GO:0120254	olefinic compound metabolic process	2/114	160/18903	0.251234	0.339511	0.23441	2	ADM/PTGS2
GO:0034599	cellular response to oxidative stress	3/114	288/18903	0.251768	0.339511	0.23441	3	EDN1/IL6/MMP3
GO:0010959	regulation of metal ion transport	4/114	423/18903	0.25196	0.339511	0.23441	4	BPIFA1/ITGB3/PDE4B/PTGS2
GO:0009299	mRNA transcription	1/114	48/18903	0.252273	0.339511	0.23441	1	EREG
GO:0010171	body morphogenesis	1/114	48/18903	0.252273	0.339511	0.23441	1	NOG
GO:0035305	negative regulation of dephosphorylation	1/114	48/18903	0.252273	0.339511	0.23441	1	TGFB2
GO:0045747	positive regulation of Notch signaling pathway	1/114	48/18903	0.252273	0.339511	0.23441	1	TGFB2
GO:0045776	negative regulation of blood pressure	1/114	48/18903	0.252273	0.339511	0.23441	1	APLN
GO:0045841	negative regulation of mitotic metaphase/anaphase transition	1/114	48/18903	0.252273	0.339511	0.23441	1	DUSP1
GO:0045981	positive regulation of nucleotide metabolic process	1/114	48/18903	0.252273	0.339511	0.23441	1	SLC4A4
GO:0046189	phenol-containing compound biosynthetic process	1/114	48/18903	0.252273	0.339511	0.23441	1	TGFB2
GO:0048483	autonomic nervous system development	1/114	48/18903	0.252273	0.339511	0.23441	1	FN1
[truncated: 698 more rows]

## Sheet: TableS5
ID	Description	GeneRatio	BgRatio	pvalue	p.adjust	qvalue	Count	geneID
GO:0019814	immunoglobulin complex	3/11	166/19869	8.99579e-05	0.00359832	0.0025567	3	IGKV3D-20/IGLC7/IGLV3-9
GO:0071735	IgG immunoglobulin complex	1/11	10/19869	0.00552374	0.0607458	0.0431615	1	IGLC7
GO:0071745	IgA immunoglobulin complex	1/11	10/19869	0.00552374	0.0607458	0.0431615	1	IGLC7
GO:0097470	ribbon synapse	1/11	11/19869	0.00607458	0.0607458	0.0431615	1	PACSIN1
GO:0030137	COPI-coated vesicle	1/11	22/19869	0.0121156	0.0969248	0.0688676	1	PACSIN1
GO:0022627	cytosolic small ribosomal subunit	1/11	45/19869	0.0246391	0.148295	0.105367	1	RPS9
GO:0001917	photoreceptor inner segment	1/11	71/19869	0.0386222	0.148295	0.105367	1	NOS1
GO:0016529	sarcoplasmic reticulum	1/11	73/19869	0.0396902	0.148295	0.105367	1	NOS1
GO:0042571	immunoglobulin complex, circulating	1/11	76/19869	0.0412902	0.148295	0.105367	1	IGLC7
GO:0015935	small ribosomal subunit	1/11	77/19869	0.0418231	0.148295	0.105367	1	RPS9
GO:0000792	heterochromatin	1/11	78/19869	0.0423556	0.148295	0.105367	1	H1-5
GO:0005798	Golgi-associated vesicle	1/11	89/19869	0.0481957	0.148295	0.105367	1	PACSIN1
GO:0016528	sarcoplasm	1/11	89/19869	0.0481957	0.148295	0.105367	1	NOS1
GO:0032587	ruffle membrane	1/11	97/19869	0.0524228	0.149779	0.106422	1	PACSIN1
GO:0022626	cytosolic ribosome	1/11	105/19869	0.0566327	0.151021	0.107304	1	RPS9
GO:0043679	axon terminus	1/11	115/19869	0.0618713	0.153234	0.108877	1	PACSIN1
GO:0044306	neuron projection terminus	1/11	131/19869	0.0701979	0.153234	0.108877	1	PACSIN1
GO:0000786	nucleosome	1/11	133/19869	0.071234	0.153234	0.108877	1	H1-5
GO:0042383	sarcolemma	1/11	136/19869	0.0727862	0.153234	0.108877	1	NOS1
GO:0043197	dendritic spine	1/11	175/19869	0.092751	0.157117	0.111636	1	NOS1
GO:0044309	neuron spine	1/11	176/19869	0.0932578	0.157117	0.111636	1	NOS1
GO:0031256	leading edge membrane	1/11	177/19869	0.0937643	0.157117	0.111636	1	PACSIN1
GO:0001726	ruffle	1/11	178/19869	0.0942705	0.157117	0.111636	1	PACSIN1
GO:0044815	DNA packaging complex	1/11	178/19869	0.0942705	0.157117	0.111636	1	H1-5
GO:0044391	ribosomal subunit	1/11	188/19869	0.0993186	0.15891	0.11291	1	RPS9
GO:0032993	protein-DNA complex	1/11	225/19869	0.117775	0.179597	0.127608	1	H1-5
GO:0005840	ribosome	1/11	232/19869	0.121228	0.179597	0.127608	1	RPS9
GO:0150034	distal axon	1/11	278/19869	0.143614	0.197864	0.140588	1	PACSIN1
GO:0030135	coated vesicle	1/11	310/19869	0.15888	0.197864	0.140588	1	PACSIN1
GO:0014069	postsynaptic density	1/11	321/19869	0.16407	0.197864	0.140588	1	NOS1
GO:0045121	membrane raft	1/11	326/19869	0.16642	0.197864	0.140588	1	NOS1
GO:0032279	asymmetric synapse	1/11	327/19869	0.166889	0.197864	0.140588	1	NOS1
GO:0098857	membrane microdomain	1/11	327/19869	0.166889	0.197864	0.140588	1	NOS1
GO:0099572	postsynaptic specialization	1/11	342/19869	0.173898	0.197864	0.140588	1	NOS1
GO:0031253	cell projection membrane	1/11	344/19869	0.174829	0.197864	0.140588	1	PACSIN1
GO:0098984	neuron to neuron synapse	1/11	351/19869	0.178078	0.197864	0.140588	1	NOS1
GO:0031252	cell leading edge	1/11	421/19869	0.209936	0.220348	0.156563	1	PACSIN1
GO:0005925	focal adhesion	1/11	422/19869	0.210383	0.220348	0.156563	1	RPS9
GO:0030055	cell-substrate junction	1/11	432/19869	0.214839	0.220348	0.156563	1	RPS9
GO:0009897	external side of plasma membrane	1/11	462/19869	0.22807	0.22807	0.16205	1	IGLC7

## Sheet: TableS6
ID	Description	GeneRatio	BgRatio	pvalue	p.adjust	qvalue	Count	geneID
GO:0070820	tertiary granule	12/117	164/19869	2.41826e-10	5.07835e-08	4.07287e-08	12	FOLR3/FPR2/GPR84/HBB/ITGAX/MCEMP1/OLR1/PPBP/PTX3/SLC11A1/SLC2A3/TNFAIP6
GO:0031091	platelet alpha granule	9/117	91/19869	3.26129e-09	2.90927e-07	2.33325e-07	9	FGA/FN1/ITGB3/PPBP/SERPINE1/SRGN/TGFB2/THBS1/TIMP1
GO:0030667	secretory granule membrane	14/117	313/19869	4.64644e-09	2.90927e-07	2.33325e-07	14	ADGRG3/ANPEP/FCGR2A/FPR2/GPR84/HLA-H/ITGAX/ITGB3/MCEMP1/MME/OLR1/PLAUR/SLC11A1/SLC2A3
GO:0031093	platelet alpha granule lumen	8/117	67/19869	5.54146e-09	2.90927e-07	2.33325e-07	8	FGA/FN1/PPBP/SERPINE1/SRGN/TGFB2/THBS1/TIMP1
GO:0062023	collagen-containing extracellular matrix	15/117	433/19869	3.87659e-08	1.62817e-06	1.3058e-06	15	ADAMTS3/ADAMTSL4/CCN1/FGA/FN1/GDF15/L1CAM/NTN4/SEMA3B/SERPINE1/TGFB2/TGFBI/THBS1/TIMP1/VTN
GO:0070821	tertiary granule membrane	7/117	73/19869	2.42116e-07	8.47406e-06	6.79624e-06	7	FPR2/GPR84/ITGAX/MCEMP1/OLR1/SLC11A1/SLC2A3
GO:0005788	endoplasmic reticulum lumen	12/117	312/19869	3.20379e-07	9.61137e-06	7.70836e-06	12	ADAMTSL4/CCN1/EDN1/FGA/FN1/FSTL3/IL6/PLAUR/PTGS2/THBS1/TIMP1/VTN
GO:0042581	specific granule	9/117	160/19869	4.46803e-07	1.17286e-05	9.40637e-06	9	ADGRG3/FOLR3/FPR2/GPR84/MCEMP1/OLR1/PLAUR/PTX3/SLC2A3
GO:0035579	specific granule membrane	7/117	91/19869	1.1023e-06	2.57203e-05	2.06278e-05	7	ADGRG3/FPR2/GPR84/MCEMP1/OLR1/PLAUR/SLC2A3
GO:0098636	protein complex involved in cell adhesion	5/117	52/19869	1.35375e-05	0.000284287	0.000228	5	ITGA5/ITGAX/ITGB3/PLAUR/VTN
GO:1904724	tertiary granule lumen	5/117	55/19869	1.78671e-05	0.0003411	0.000273564	5	FOLR3/HBB/PPBP/PTX3/TNFAIP6
GO:0034774	secretory granule lumen	10/117	322/19869	2.09588e-05	0.000358644	0.000287634	10	FGA/FN1/FOLR3/PPBP/PTX3/SERPINE1/SRGN/TGFB2/THBS1/TIMP1
GO:0060205	cytoplasmic vesicle lumen	10/117	325/19869	2.26891e-05	0.000358644	0.000287634	10	FGA/FN1/FOLR3/PPBP/PTX3/SERPINE1/SRGN/TGFB2/THBS1/TIMP1
GO:0031983	vesicle lumen	10/117	327/19869	2.39096e-05	0.000358644	0.000287634	10	FGA/FN1/FOLR3/PPBP/PTX3/SERPINE1/SRGN/TGFB2/THBS1/TIMP1
GO:0031838	haptoglobin-hemoglobin complex	3/117	11/19869	3.17242e-05	0.000444139	0.000356202	3	HBA1/HBA2/HBB
GO:0030139	endocytic vesicle	10/117	343/19869	3.58732e-05	0.000470836	0.000377613	10	AREG/EREG/HBA1/HBA2/HBB/HBEGF/HLA-DRB4/HLA-H/RAB32/SLC11A1
GO:0005833	hemoglobin complex	3/117	12/19869	4.21173e-05	0.000520272	0.000417261	3	HBA1/HBA2/HBB
GO:0030666	endocytic vesicle membrane	7/117	194/19869	0.000152267	0.00177645	0.00142472	7	AREG/EREG/HBEGF/HLA-DRB4/HLA-H/RAB32/SLC11A1
GO:0072562	blood microparticle	6/117	145/19869	0.000219062	0.00242121	0.00194182	6	FGA/FN1/HBA1/HBA2/HBB/VTN
GO:0005604	basement membrane	5/117	99/19869	0.000299026	0.00313977	0.00251811	5	FN1/NTN4/TGFBI/TIMP1/VTN
GO:0071682	endocytic vesicle lumen	3/117	23/19869	0.000323388	0.00323388	0.00259359	3	HBA1/HBA2/HBB
GO:0101003	ficolin-1-rich granule membrane	4/117	61/19869	0.000460043	0.00439132	0.00352186	4	FPR2/ITGAX/SLC11A1/SLC2A3
GO:0008305	integrin complex	3/117	31/19869	0.000793119	0.00699507	0.00561008	3	ITGA5/ITGAX/ITGB3
GO:0101002	ficolin-1-rich granule	6/117	185/19869	0.000799436	0.00699507	0.00561008	6	FPR2/HBB/ITGAX/SLC11A1/SLC2A3/TNFAIP6
GO:0030669	clathrin-coated endocytic vesicle membrane	4/117	72/19869	0.000862971	0.00724896	0.0058137	4	AREG/EREG/HBEGF/HLA-DRB4
GO:0030133	transport vesicle	9/117	423/19869	0.000899109	0.00726204	0.00582419	9	AREG/EDN1/GALNT15/HLA-DRB4/HLA-H/MME/PDE4B/PTPRN/SYN1
GO:0009897	external side of plasma membrane	9/117	462/19869	0.0016563	0.0128823	0.0103317	9	ANPEP/FGA/FOLR3/HLA-H/ITGA5/ITGAX/ITGB3/NT5E/THBS1
GO:1904090	peptidase inhibitor complex	2/117	11/19869	0.00182638	0.0136978	0.0109857	2	SERPINE1/VTN
GO:0045334	clathrin-coated endocytic vesicle	4/117	90/19869	0.00197636	0.0143116	0.011478	4	AREG/EREG/HBEGF/HLA-DRB4
GO:0098637	protein complex involved in cell-matrix adhesion	2/117	14/19869	0.00298713	0.0209099	0.0167699	2	PLAUR/VTN
GO:0061702	inflammasome complex	2/117	18/19869	0.00494571	0.0335032	0.0268697	2	MEFV/NLRP3
GO:0012507	ER to Golgi transport vesicle membrane	3/117	63/19869	0.00611287	0.0401157	0.032173	3	AREG/HLA-DRB4/HLA-H
GO:0030662	coated vesicle membrane	5/117	198/19869	0.00636534	0.0405067	0.0324866	5	AREG/EREG/HBEGF/HLA-DRB4/HLA-H
GO:0030665	clathrin-coated vesicle membrane	4/117	132/19869	0.00774183	0.0478172	0.0383496	4	AREG/EREG/HBEGF/HLA-DRB4
GO:0030136	clathrin-coated vesicle	5/117	211/19869	0.00826538	0.0495923	0.0397732	5	AREG/EDN1/EREG/HBEGF/HLA-DRB4
GO:0042611	MHC protein complex	2/117	25/19869	0.00944072	0.0550709	0.0441671	2	HLA-DRB4/HLA-H
GO:0030135	coated vesicle	6/117	310/19869	0.0101428	0.0561184	0.0450072	6	AREG/EDN1/EREG/HBEGF/HLA-DRB4/HLA-H
GO:0030658	transport vesicle membrane	5/117	222/19869	0.0101548	0.0561184	0.0450072	5	AREG/HLA-DRB4/HLA-H/PTPRN/SYN1
GO:0030670	phagocytic vesicle membrane	3/117	77/19869	0.0106115	0.0571389	0.0458257	3	HLA-H/RAB32/SLC11A1
GO:0071556	integral component of lumenal side of endoplasmic reticulum membrane	2/117	29/19869	0.0125825	0.0644471	0.0516869	2	HLA-DRB4/HLA-H
GO:0098553	lumenal side of endoplasmic reticulum membrane	2/117	29/19869	0.0125825	0.0644471	0.0516869	2	HLA-DRB4/HLA-H
GO:0031225	anchored component of membrane	4/117	169/19869	0.0178225	0.0880176	0.0705905	4	FOLR3/NT5E/PLAUR/SYN1
GO:0098576	lumenal side of membrane	2/117	35/19869	0.0180226	0.0880176	0.0705905	2	HLA-DRB4/HLA-H
GO:0030134	COPII-coated ER to Golgi transport vesicle	3/117	95/19869	0.0186105	0.0888228	0.0712364	3	AREG/HLA-DRB4/HLA-H
GO:0043025	neuronal cell body	7/117	497/19869	0.0277319	0.128989	0.10345	7	DNER/IGF2BP1/L1CAM/MME/PTPRN/SLC2A3/TGFB2
GO:0005891	voltage-gated calcium channel complex	2/117	45/19869	0.028869	0.128989	0.10345	2	CATSPER1/PDE4B
GO:0022627	cytosolic small ribosomal subunit	2/117	45/19869	0.028869	0.128989	0.10345	2	HBA1/HBA2
GO:0098802	plasma membrane signaling receptor complex	5/117	319/19869	0.0405033	0.177202	0.142117	5	CSF2/IL6/ITGA5/ITGAX/ITGB3
GO:0005793	endoplasmic reticulum-Golgi intermediate compartment	3/117	133/19869	0.0439582	0.188392	0.151092	3	ANPEP/AREG/FN1
GO:0045335	phagocytic vesicle	3/117	139/19869	0.0489916	0.205765	0.165024	3	HLA-H/RAB32/SLC11A1
GO:0035580	specific granule lumen	2/117	62/19869	0.0517142	0.212941	0.17078	2	FOLR3/PTX3
GO:0034704	calcium channel complex	2/117	69/19869	0.0624934	0.244673	0.196229	2	CATSPER1/PDE4B
GO:0005614	interstitial matrix	1/117	11/19869	0.0629158	0.244673	0.196229	1	ADAMTSL4
GO:1905370	serine-type endopeptidase complex	1/117	11/19869	0.0629158	0.244673	0.196229	1	PLAUR
GO:0033391	chromatoid body	1/117	12/19869	0.0684369	0.250902	0.201225	1	PIWIL2
GO:0043256	laminin complex	1/117	12/19869	0.0684369	0.250902	0.201225	1	NTN4
GO:0098993	anchored component of synaptic vesicle membrane	1/117	12/19869	0.0684369	0.250902	0.201225	1	SYN1
GO:0005802	trans-Golgi network	4/117	262/19869	0.0692969	0.250902	0.201225	4	HLA-DRB4/MME/RAB32/TGFBI
GO:0044194	cytolytic granule	1/117	13/19869	0.0739258	0.25874	0.207511	1	SRGN
GO:1905286	serine-type peptidase complex	1/117	13/19869	0.0739258	0.25874	0.207511	1	PLAUR
GO:0015935	small ribosomal subunit	2/117	77/19869	0.0756459	0.26042	0.208858	2	HBA1/HBA2
GO:0010369	chromocenter	1/117	14/19869	0.0793827	0.264609	0.212218	1	PIWIL2
GO:0036128	CatSper complex	1/117	14/19869	0.0793827	0.264609	0.212218	1	CATSPER1
GO:0005791	rough endoplasmic reticulum	2/117	80/19869	0.0807864	0.26508	0.212596	2	EDN1/VTN
GO:0010494	cytoplasmic stress granule	2/117	84/19869	0.0878031	0.27999	0.224554	2	IGF2BP1/ZFP36
GO:0001726	ruffle	3/117	178/19869	0.0879969	0.27999	0.224554	3	ITGA5/ITGB3/MEFV
GO:0000930	gamma-tubulin complex	1/117	16/19869	0.0902008	0.282719	0.226742	1	PDE4B
GO:0031092	platelet alpha granule membrane	1/117	17/19869	0.0955626	0.290843	0.233257	1	ITGB3
GO:0042613	MHC class II protein complex	1/117	17/19869	0.0955626	0.290843	0.233257	1	HLA-DRB4
GO:0031527	filopodium membrane	1/117	18/19869	0.100893	0.297603	0.238679	1	ITGB3
GO:0044214	spanning component of plasma membrane	1/117	18/19869	0.100893	0.297603	0.238679	1	SLC4A4
GO:0005925	focal adhesion	5/117	422/19869	0.104062	0.297603	0.238679	5	ITGA5/ITGB3/L1CAM/MME/PLAUR
GO:0031362	anchored component of external side of plasma membrane	1/117	20/19869	0.111461	0.297603	0.238679	1	FOLR3
GO:0033162	melanosome membrane	1/117	20/19869	0.111461	0.297603	0.238679	1	RAB32
GO:0045009	chitosome	1/117	20/19869	0.111461	0.297603	0.238679	1	RAB32
GO:0090741	pigment granule membrane	1/117	20/19869	0.111461	0.297603	0.238679	1	RAB32
GO:0000932	P-body	2/117	97/19869	0.111754	0.297603	0.238679	2	IGF2BP1/ZFP36
GO:0032587	ruffle membrane	2/117	97/19869	0.111754	0.297603	0.238679	2	ITGA5/ITGB3
GO:0030055	cell-substrate junction	5/117	432/19869	0.111956	0.297603	0.238679	5	ITGA5/ITGB3/L1CAM/MME/PLAUR
GO:0019898	extrinsic component of membrane	4/117	316/19869	0.116567	0.302434	0.242554	4	FOLR3/PLAUR/SOCS3/SYN1
GO:0044233	mitochondria-associated endoplasmic reticulum membrane	1/117	21/19869	0.116698	0.302434	0.242554	1	RAB32
GO:0030027	lamellipodium	3/117	203/19869	0.118093	0.302434	0.242554	3	IGF2BP1/ITGB3/MEFV
GO:0005811	lipid droplet	2/117	102/19869	0.121374	0.303602	0.24349	2	FABP4/G0S2
GO:0031258	lamellipodium membrane	1/117	22/19869	0.121905	0.303602	0.24349	1	ITGB3
GO:0008021	synaptic vesicle	3/117	208/19869	0.124524	0.303602	0.24349	3	MME/PDE4B/SYN1
GO:0044295	axonal growth cone	1/117	23/19869	0.127081	0.303602	0.24349	1	L1CAM
GO:0022626	cytosolic ribosome	2/117	105/19869	0.127242	0.303602	0.24349	2	HBA1/HBA2
GO:0031233	intrinsic component of external side of plasma membrane	1/117	24/19869	0.132228	0.303602	0.24349	1	FOLR3
GO:0030175	filopodium	2/117	108/19869	0.133175	0.303602	0.24349	2	IGF2BP1/ITGB3
GO:0042470	melanosome	2/117	110/19869	0.137165	0.303602	0.24349	2	ITGB3/RAB32
GO:0048770	pigment granule	2/117	110/19869	0.137165	0.303602	0.24349	2	ITGB3/RAB32
GO:0043186	P granule	1/117	25/19869	0.137344	0.303602	0.24349	1	PIWIL2
GO:0045495	pole plasm	1/117	25/19869	0.137344	0.303602	0.24349	1	PIWIL2
GO:0060293	germ plasm	1/117	25/19869	0.137344	0.303602	0.24349	1	PIWIL2
GO:0089717	spanning component of membrane	1/117	25/19869	0.137344	0.303602	0.24349	1	SLC4A4
GO:0070382	exocytic vesicle	3/117	226/19869	0.148668	0.325212	0.260821	3	MME/PDE4B/SYN1
GO:0005721	pericentric heterochromatin	1/117	28/19869	0.152513	0.326814	0.262107	1	SNAI1
GO:0031528	microvillus membrane	1/117	28/19869	0.152513	0.326814	0.262107	1	ITGB3
GO:0005942	phosphatidylinositol 3-kinase complex	1/117	29/19869	0.157511	0.334114	0.267961	1	SOCS3
GO:0031968	organelle outer membrane	3/117	235/19869	0.161271	0.337828	0.27094	3	BCL2A1/PTGS2/RAB32
GO:0005640	nuclear outer membrane	1/117	30/19869	0.162479	0.337828	0.27094	1	PTGS2
GO:0019867	outer membrane	3/117	237/19869	0.164115	0.337884	0.270985	3	BCL2A1/PTGS2/RAB32
GO:1904813	ficolin-1-rich granule lumen	2/117	124/19869	0.165773	0.337985	0.271065	2	HBB/TNFAIP6
GO:0097228	sperm principal piece	1/117	33/19869	0.17721	0.357486	0.286706	1	CATSPER1
GO:0036464	cytoplasmic ribonucleoprotein granule	3/117	248/19869	0.18002	0.357486	0.286706	3	IGF2BP1/PIWIL2/ZFP36
GO:0044306	neuron projection terminus	2/117	131/19869	0.180445	0.357486	0.286706	2	MME/PTPRN
GO:0098791	Golgi apparatus subcompartment	4/117	387/19869	0.19448	0.38169	0.306117	4	HLA-DRB4/MME/RAB32/TGFBI
GO:0035770	ribonucleoprotein granule	3/117	265/19869	0.205372	0.399334	0.320268	3	IGF2BP1/PIWIL2/ZFP36
GO:0000795	synaptonemal complex	1/117	40/19869	0.210592	0.402039	0.322437	1	SYN1
GO:0099086	synaptonemal structure	1/117	40/19869	0.210592	0.402039	0.322437	1	SYN1
GO:0045178	basal part of cell	3/117	272/19869	0.216044	0.408732	0.327805	3	AQP9/EDN1/SLC4A4
GO:0098563	intrinsic component of synaptic vesicle membrane	1/117	42/19869	0.21988	0.408818	0.327874	1	SYN1
GO:0036126	sperm flagellum	2/117	150/19869	0.221108	0.408818	0.327874	2	CATSPER1/IL4I1
GO:0150034	distal axon	3/117	278/19869	0.225285	0.408818	0.327874	3	IGF2BP1/L1CAM/PTPRN
GO:0005769	early endosome	4/117	414/19869	0.227598	0.408818	0.327874	4	DNER/HLA-H/MME/RAB32
GO:0043204	perikaryon	2/117	154/19869	0.229776	0.408818	0.327874	2	PTPRN/SLC2A3
GO:0031902	late endosome membrane	2/117	155/19869	0.231946	0.408818	0.327874	2	HLA-DRB4/SLC11A1
GO:0005765	lysosomal membrane	4/117	418/19869	0.232626	0.408818	0.327874	4	ANPEP/DRAM1/HLA-DRB4/HLA-H
GO:0098852	lytic vacuole membrane	4/117	418/19869	0.232626	0.408818	0.327874	4	ANPEP/DRAM1/HLA-DRB4/HLA-H
GO:0001772	immunological synapse	1/117	45/19869	0.23361	0.408818	0.327874	1	IL4I1
GO:0031252	cell leading edge	4/117	421/19869	0.236415	0.410308	0.329069	4	IGF2BP1/ITGA5/ITGB3/MEFV
GO:0044232	organelle membrane contact site	1/117	48/19869	0.247101	0.425337	0.341123	1	RAB32
GO:0030176	integral component of endoplasmic reticulum membrane	2/117	164/19869	0.251533	0.429446	0.344418	2	HLA-DRB4/HLA-H
GO:0097729	9+2 motile cilium	2/117	165/19869	0.253713	0.429675	0.344602	2	CATSPER1/IL4I1
GO:0097225	sperm midpiece	1/117	50/19869	0.255963	0.430018	0.344877	1	IL4I1
GO:0030426	growth cone	2/117	167/19869	0.258075	0.430125	0.344962	2	IGF2BP1/L1CAM
GO:0060076	excitatory synapse	1/117	52/19869	0.264722	0.437729	0.351061	1	PDE4B
GO:0031227	intrinsic component of endoplasmic reticulum membrane	2/117	172/19869	0.268984	0.441302	0.353927	2	HLA-DRB4/HLA-H
GO:0030427	site of polarized growth	2/117	173/19869	0.271166	0.441433	0.354032	2	IGF2BP1/L1CAM
GO:0031312	extrinsic component of organelle membrane	1/117	54/19869	0.273379	0.441612	0.354175	1	SYN1
GO:0043197	dendritic spine	2/117	175/19869	0.27553	0.441689	0.354237	2	IGF2BP1/PDE4B
GO:0044309	neuron spine	2/117	176/19869	0.277711	0.441813	0.354336	2	IGF2BP1/PDE4B
GO:0031256	leading edge membrane	2/117	177/19869	0.279892	0.441935	0.354434	2	ITGA5/ITGB3
GO:0005774	vacuolar membrane	4/117	461/19869	0.288177	0.45162	0.362201	4	ANPEP/DRAM1/HLA-DRB4/HLA-H
GO:0035577	azurophil granule membrane	1/117	58/19869	0.29039	0.451718	0.36228	1	HLA-H
GO:0045121	membrane raft	3/117	326/19869	0.301328	0.462367	0.370821	3	MME/OLR1/PTGS2
GO:0098857	membrane microdomain	3/117	327/19869	0.302937	0.462367	0.370821	3	MME/OLR1/PTGS2
GO:0044391	ribosomal subunit	2/117	188/19869	0.303841	0.462367	0.370821	2	HBA1/HBA2
GO:0046658	anchored component of plasma membrane	1/117	62/19869	0.307007	0.463824	0.371989	1	FOLR3
GO:0005637	nuclear inner membrane	1/117	63/19869	0.311101	0.466651	0.374256	1	PTGS2
GO:0005741	mitochondrial outer membrane	2/117	207/19869	0.344839	0.512991	0.411422	2	BCL2A1/RAB32
GO:0098685	Schaffer collateral - CA1 synapse	1/117	72/19869	0.34688	0.512991	0.411422	1	SYN1
GO:0016529	sarcoplasmic reticulum	1/117	73/19869	0.35074	0.515072	0.413091	1	THBS1
GO:0048786	presynaptic active zone	1/117	75/19869	0.358392	0.522655	0.419172	1	SYN1
GO:0016324	apical plasma membrane	3/117	368/19869	0.368956	0.530276	0.425284	3	FN1/ITGB3/SLC22A4
GO:0000792	heterochromatin	1/117	78/19869	0.369703	0.530276	0.425284	1	SNAI1
GO:0000794	condensed nuclear chromosome	1/117	79/19869	0.373429	0.530276	0.425284	1	SYN1
GO:0034703	cation channel complex	2/117	222/19869	0.376668	0.530276	0.425284	2	CATSPER1/PDE4B
GO:0033116	endoplasmic reticulum-Golgi intermediate compartment membrane	1/117	80/19869	0.377133	0.530276	0.425284	1	AREG
GO:0098858	actin-based cell projection	2/117	223/19869	0.378769	0.530276	0.425284	2	IGF2BP1/ITGB3
GO:0005901	caveola	1/117	82/19869	0.384477	0.531185	0.426013	1	PTGS2
GO:1905369	endopeptidase complex	1/117	82/19869	0.384477	0.531185	0.426013	1	PLAUR
GO:0016323	basolateral plasma membrane	2/117	229/19869	0.391311	0.537093	0.430751	2	AQP9/SLC4A4
GO:0005840	ribosome	2/117	232/19869	0.39754	0.5421	0.434767	2	HBA1/HBA2
GO:0016528	sarcoplasm	1/117	89/19869	0.40951	0.55482	0.444969	1	THBS1
GO:0031514	motile cilium	2/117	244/19869	0.42216	0.566276	0.454156	2	CATSPER1/IL4I1
GO:0005902	microvillus	1/117	93/19869	0.423359	0.566276	0.454156	1	ITGB3
GO:0000775	chromosome, centromeric region	2/117	250/19869	0.434279	0.577019	0.462772	2	CEBPB/SNAI1
GO:0055038	recycling endosome membrane	1/117	97/19869	0.436885	0.577019	0.462772	1	HLA-H
GO:0009925	basal plasma membrane	2/117	254/19869	0.442283	0.580496	0.465561	2	AQP9/SLC4A4
GO:0032588	trans-Golgi network membrane	1/117	101/19869	0.450097	0.584073	0.46843	1	HLA-DRB4
GO:0031300	intrinsic component of organelle membrane	3/117	420/19869	0.450944	0.584073	0.46843	3	HLA-DRB4/HLA-H/SYN1
GO:0005903	brush border	1/117	102/19869	0.453352	0.584073	0.46843	1	MME
GO:0005796	Golgi lumen	1/117	106/19869	0.466181	0.596939	0.478748	1	VTN
GO:0045177	apical part of cell	3/117	435/19869	0.473851	0.603083	0.483676	3	FN1/ITGB3/SLC22A4
GO:0000793	condensed chromosome	2/117	273/19869	0.479437	0.606517	0.486429	2	CEBPB/SYN1
GO:0044853	plasma membrane raft	1/117	113/19869	0.487917	0.606623	0.486515	1	PTGS2
GO:0030672	synaptic vesicle membrane	1/117	114/19869	0.49095	0.606623	0.486515	1	SYN1
GO:0099501	exocytic vesicle membrane	1/117	114/19869	0.49095	0.606623	0.486515	1	SYN1
GO:0005776	autophagosome	1/117	115/19869	0.493965	0.606623	0.486515	1	MEFV
GO:0043679	axon terminus	1/117	115/19869	0.493965	0.606623	0.486515	1	PTPRN
GO:1905368	peptidase complex	1/117	118/19869	0.502904	0.61401	0.492439	1	PLAUR
GO:0005770	late endosome	2/117	288/19869	0.507694	0.616276	0.494257	2	HLA-DRB4/SLC11A1
GO:0034702	ion channel complex	2/117	296/19869	0.522357	0.630431	0.505609	2	CATSPER1/PDE4B
GO:0016363	nuclear matrix	1/117	126/19869	0.525982	0.631179	0.506209	1	CEBPB
GO:0030018	Z disc	1/117	130/19869	0.53712	0.640882	0.513991	1	PDE4B
GO:0001669	acrosomal vesicle	1/117	133/19869	0.545303	0.646969	0.518873	1	IL4I1
GO:0014069	postsynaptic density	2/117	321/19869	0.566282	0.665335	0.533602	2	PDE4B/SYN1
GO:0031674	I band	1/117	143/19869	0.571556	0.665335	0.533602	1	PDE4B
GO:0032279	asymmetric synapse	2/117	327/19869	0.576388	0.665335	0.533602	2	PDE4B/SYN1
GO:0001650	fibrillar center	1/117	145/19869	0.576624	0.665335	0.533602	1	SNAI1
GO:0034399	nuclear periphery	1/117	145/19869	0.576624	0.665335	0.533602	1	CEBPB
GO:0099572	postsynaptic specialization	2/117	342/19869	0.600905	0.678393	0.544075	2	PDE4B/SYN1
GO:0005766	primary lysosome	1/117	155/19869	0.601083	0.678393	0.544075	1	HLA-H
GO:0042582	azurophil granule	1/117	155/19869	0.601083	0.678393	0.544075	1	HLA-H
GO:0099699	integral component of synaptic membrane	1/117	155/19869	0.601083	0.678393	0.544075	1	ITGB3
GO:0031253	cell projection membrane	2/117	344/19869	0.604093	0.678393	0.544075	2	ITGA5/ITGB3
GO:0098862	cluster of actin-based cell projections	1/117	159/19869	0.61047	0.681908	0.546894	1	MME
GO:0098984	neuron to neuron synapse	2/117	351/19869	0.615101	0.683445	0.548127	2	PDE4B/SYN1
GO:0005875	microtubule associated complex	1/117	166/19869	0.626373	0.688683	0.552327	1	MEFV
GO:0099240	intrinsic component of synaptic membrane	1/117	166/19869	0.626373	0.688683	0.552327	1	ITGB3
GO:0000779	condensed chromosome, centromeric region	1/117	174/19869	0.643761	0.704114	0.564703	1	CEBPB
GO:1902495	transmembrane transporter complex	2/117	379/19869	0.656812	0.714666	0.573166	2	CATSPER1/PDE4B
GO:0031901	early endosome membrane	1/117	183/19869	0.662365	0.716993	0.575032	1	HLA-H
GO:0098687	chromosomal region	2/117	388/19869	0.669438	0.720207	0.577609	2	CEBPB/SNAI1
GO:0031301	integral component of organelle membrane	2/117	390/19869	0.672193	0.720207	0.577609	2	HLA-DRB4/HLA-H
GO:0055037	recycling endosome	1/117	198/19869	0.691254	0.734227	0.588854	1	HLA-H
GO:1990351	transporter complex	2/117	405/19869	0.692271	0.734227	0.588854	2	CATSPER1/PDE4B
GO:0030017	sarcomere	1/117	214/19869	0.719371	0.759135	0.60883	1	PDE4B
GO:0030016	myofibril	1/117	233/19869	0.749479	0.786953	0.63114	1	PDE4B
GO:0043292	contractile fiber	1/117	242/19869	0.762601	0.796747	0.638995	1	PDE4B
GO:0000228	nuclear chromosome	1/117	249/19869	0.772333	0.798965	0.640774	1	SYN1
GO:0090575	RNA polymerase II transcription regulator complex	1/117	249/19869	0.772333	0.798965	0.640774	1	CEBPB
GO:0045211	postsynaptic membrane	1/117	269/19869	0.798013	0.821484	0.658834	1	ITGB3
GO:0061695	transferase complex, transferring phosphorus-containing groups	1/117	295/19869	0.827148	0.847323	0.679557	1	SOCS3
GO:0031965	nuclear membrane	1/117	305/19869	0.837209	0.853465	0.684483	1	PTGS2
GO:0098978	glutamatergic synapse	1/117	324/19869	0.854751	0.867139	0.69545	1	ITGB3
GO:0097060	synaptic membrane	1/117	378/19869	0.895019	0.903625	0.724712	1	ITGB3
GO:0005874	microtubule	1/117	466/19869	0.938271	0.94276	0.756098	1	MEFV
GO:0005635	nuclear envelope	1/117	488/19869	0.945966	0.945966	0.758669	1	PTGS2

## Sheet: TableS7
ID	Description	GeneRatio	BgRatio	pvalue	p.adjust	qvalue	Count	geneID
GO:0048306	calcium-dependent protein binding	2/9	81/18432	0.000673077	0.0242308	0.012753	2	NOS1/S100A7A
GO:0070513	death domain binding	1/9	11/18432	0.00535945	0.065718	0.0345884	1	DAPL1
GO:1901338	catecholamine binding	1/9	13/18432	0.00633115	0.065718	0.0345884	1	ADRA2B
GO:0010181	FMN binding	1/9	15/18432	0.007302	0.065718	0.0345884	1	NOS1
GO:0016709	oxidoreductase activity, acting on paired donors, with incorporation or reduction of molecular oxygen, NAD(P)H as one donor, and incorporation of one atom of oxygen	1/9	40/18432	0.0193667	0.0878037	0.0462125	1	NOS1
GO:0017080	sodium channel regulator activity	1/9	40/18432	0.0193667	0.0878037	0.0462125	1	NOS1
GO:0031492	nucleosomal DNA binding	1/9	40/18432	0.0193667	0.0878037	0.0462125	1	H1-5
GO:0008227	G protein-coupled amine receptor activity	1/9	51/18432	0.0246338	0.0878037	0.0462125	1	ADRA2B
GO:0050661	NADP binding	1/9	53/18432	0.0255887	0.0878037	0.0462125	1	NOS1
GO:0016597	amino acid binding	1/9	54/18432	0.0260659	0.0878037	0.0462125	1	NOS1
GO:0097110	scaffold protein binding	1/9	66/18432	0.0317756	0.0878037	0.0462125	1	NOS1
GO:0019843	rRNA binding	1/9	67/18432	0.0322501	0.0878037	0.0462125	1	RPS9
GO:0031491	nucleosome binding	1/9	70/18432	0.0336722	0.0878037	0.0462125	1	H1-5
GO:0043621	protein self-association	1/9	71/18432	0.0341459	0.0878037	0.0462125	1	S100A7A
GO:0034987	immunoglobulin receptor binding	1/9	79/18432	0.0379276	0.0910261	0.0479085	1	IGLC7
GO:0050660	flavin adenine dinucleotide binding	1/9	87/18432	0.0416961	0.0938162	0.0493769	1	NOS1
GO:0030527	structural constituent of chromatin	1/9	99/18432	0.0473243	0.0975601	0.0513474	1	H1-5
GO:0004497	monooxygenase activity	1/9	104/18432	0.0496606	0.0975601	0.0513474	1	NOS1
GO:0031490	chromatin DNA binding	1/9	118/18432	0.0561755	0.0975601	0.0513474	1	H1-5
GO:0042826	histone deacetylase binding	1/9	128/18432	0.0608046	0.0975601	0.0513474	1	H1-5
GO:0044325	transmembrane transporter binding	1/9	128/18432	0.0608046	0.0975601	0.0513474	1	NOS1
GO:0043177	organic acid binding	1/9	137/18432	0.0649535	0.0975601	0.0513474	1	NOS1
GO:0020037	heme binding	1/9	139/18432	0.0658733	0.0975601	0.0513474	1	NOS1
GO:0099106	ion channel regulator activity	1/9	140/18432	0.0663328	0.0975601	0.0513474	1	NOS1
GO:0016247	channel regulator activity	1/9	145/18432	0.0686277	0.0975601	0.0513474	1	NOS1
GO:0046906	tetrapyrrole binding	1/9	149/18432	0.07046	0.0975601	0.0513474	1	NOS1
GO:0003823	antigen binding	1/9	171/18432	0.0804806	0.100921	0.0531161	1	IGLC7
GO:0031406	carboxylic acid binding	1/9	171/18432	0.0804806	0.100921	0.0531161	1	NOS1
GO:0003735	structural constituent of ribosome	1/9	176/18432	0.0827445	0.100921	0.0531161	1	RPS9
GO:0016705	oxidoreductase activity, acting on paired donors, with incorporation or reduction of molecular oxygen	1/9	179/18432	0.0841005	0.100921	0.0531161	1	NOS1
GO:0005516	calmodulin binding	1/9	200/18432	0.0935427	0.10863	0.0571738	1	NOS1
GO:0005125	cytokine activity	1/9	237/18432	0.109969	0.123715	0.065113	1	IL19
GO:0045182	translation regulator activity	1/9	407/18432	0.182089	0.198642	0.104549	1	RPS9
GO:0005543	phospholipid binding	1/9	474/18432	0.209053	0.218518	0.11501	1	PACSIN1
GO:0048018	receptor ligand activity	1/9	491/18432	0.215768	0.218518	0.11501	1	IL19
GO:0030546	signaling receptor activator activity	1/9	498/18432	0.218518	0.218518	0.11501	1	IL19

## Sheet: TableS8
ID	Description	GeneRatio	BgRatio	pvalue	p.adjust	qvalue	Count	geneID
GO:0048018	receptor ligand activity	23/116	491/18432	4.20515e-14	9.01086e-12	7.3972e-12	23	ADM/APLN/AREG/CCL20/CCL3L1/CSF2/CXCL2/CXCL3/CXCL8/EDN1/EREG/GDF15/HBEGF/IL11/IL1B/IL6/INHBA/OSM/PPBP/SEMA3B/TG/TGFB2/TIMP1
GO:0030546	signaling receptor activator activity	23/116	498/18432	5.66721e-14	9.01086e-12	7.3972e-12	23	ADM/APLN/AREG/CCL20/CCL3L1/CSF2/CXCL2/CXCL3/CXCL8/EDN1/EREG/GDF15/HBEGF/IL11/IL1B/IL6/INHBA/OSM/PPBP/SEMA3B/TG/TGFB2/TIMP1
GO:0005125	cytokine activity	17/116	237/18432	1.3344e-13	1.41446e-11	1.16116e-11	17	AREG/CCL20/CCL3L1/CSF2/CXCL2/CXCL3/CXCL8/EDN1/GDF15/IL11/IL1B/IL6/INHBA/OSM/PPBP/TGFB2/TIMP1
GO:0008083	growth factor activity	12/116	162/18432	4.40754e-10	3.50399e-08	2.8765e-08	12	AREG/CSF2/EREG/GDF15/HBEGF/IL11/IL6/INHBA/OSM/PPBP/TGFB2/TIMP1
GO:0005126	cytokine receptor binding	14/116	273/18432	1.84316e-09	1.17225e-07	9.62321e-08	14	CCL20/CCL3L1/CSF2/CXCL2/CXCL3/CXCL8/IL11/IL1B/IL6/ITGA5/ITGB3/OSM/PPBP/TGFB2
GO:0005178	integrin binding	10/116	156/18432	5.34052e-08	2.83047e-06	2.32359e-06	10	CCN1/FN1/IBSP/IL1B/ITGA5/ITGAX/ITGB3/TGFBI/THBS1/VTN
GO:0070851	growth factor receptor binding	9/116	140/18432	2.48858e-07	1.13053e-05	9.28073e-06	9	AREG/CSF2/EREG/HBEGF/IL11/IL1B/IL6/ITGA5/ITGB3
GO:0008009	chemokine activity	6/116	49/18432	6.11709e-07	2.43154e-05	1.9961e-05	6	CCL20/CCL3L1/CXCL2/CXCL3/CXCL8/PPBP
GO:0050840	extracellular matrix binding	6/116	56/18432	1.37034e-06	4.84188e-05	3.9748e-05	6	CCN1/ITGB3/NTN4/TGFBI/THBS1/VTN
GO:0045236	CXCR chemokine receptor binding	4/116	18/18432	4.25704e-06	0.000135374	0.000111131	4	CXCL2/CXCL3/CXCL8/PPBP
GO:0042379	chemokine receptor binding	6/116	71/18432	5.59848e-06	0.000161847	0.000132863	6	CCL20/CCL3L1/CXCL2/CXCL3/CXCL8/PPBP
GO:0001664	G protein-coupled receptor binding	10/116	289/18432	1.45152e-05	0.000384652	0.000315769	10	ADM/APLN/CCL20/CCL3L1/CXCL2/CXCL3/CXCL8/EDN1/PPBP/PROK2
GO:0005539	glycosaminoglycan binding	9/116	237/18432	1.90694e-05	0.000466467	0.000382932	9	ADAMTS3/CCN1/CXCL8/FN1/HBEGF/NLRP3/THBS1/TNFAIP6/VTN
GO:0031720	haptoglobin binding	3/116	10/18432	2.82224e-05	0.000641051	0.000526252	3	HBA1/HBA2/HBB
GO:0001968	fibronectin binding	4/116	31/18432	4.10947e-05	0.000871207	0.000715191	4	FSTL3/ITGB3/THBS1/TNFAIP6
GO:0005154	epidermal growth factor receptor binding	4/116	33/18432	5.29272e-05	0.00105193	0.000863549	4	AREG/EREG/HBEGF/ITGA5
GO:0005344	oxygen carrier activity	3/116	14/18432	8.40475e-05	0.00148484	0.00121893	3	HBA1/HBA2/HBB
GO:0030297	transmembrane receptor protein tyrosine kinase activator activity	3/116	14/18432	8.40475e-05	0.00148484	0.00121893	3	AREG/EREG/HBEGF
GO:0008201	heparin binding	7/116	171/18432	0.000104383	0.00174704	0.00143418	7	ADAMTS3/CCN1/CXCL8/FN1/HBEGF/THBS1/VTN
GO:0004601	peroxidase activity	4/116	55/18432	0.000396552	0.00630518	0.00517605	4	HBA1/HBA2/HBB/PTGS2
GO:0016684	oxidoreductase activity, acting on peroxide as acceptor	4/116	57/18432	0.000454869	0.00688802	0.00565451	4	HBA1/HBA2/HBB/PTGS2
GO:0005201	extracellular matrix structural constituent	6/116	173/18432	0.000793376	0.0114679	0.00941422	6	CCN1/FGA/FN1/TGFBI/THBS1/VTN
GO:0030296	protein tyrosine kinase activator activity	3/116	30/18432	0.000871124	0.0120442	0.00988735	3	AREG/EREG/HBEGF
GO:0005518	collagen binding	4/116	69/18432	0.000939485	0.0124482	0.010219	4	FN1/TGFBI/THBS1/VTN
GO:0005179	hormone activity	5/116	122/18432	0.00104508	0.0132934	0.0109128	5	ADM/APLN/EDN1/INHBA/TG
GO:1901681	sulfur compound binding	7/116	270/18432	0.00160762	0.0196624	0.0161413	7	ADAMTS3/CCN1/CXCL8/FN1/HBEGF/THBS1/VTN
GO:0008330	protein tyrosine/threonine phosphatase activity	2/116	10/18432	0.00170968	0.0201362	0.0165302	2	DUSP1/DUSP6
GO:0002020	protease binding	5/116	139/18432	0.00186309	0.0206356	0.0169402	5	ADAMTSL4/FN1/ITGB3/SERPINE1/TIMP1
GO:0019825	oxygen binding	3/116	39/18432	0.00188186	0.0206356	0.0169402	3	HBA1/HBA2/HBB
GO:0016209	antioxidant activity	4/116	85/18432	0.00203727	0.021595	0.0177278	4	HBA1/HBA2/HBB/PTGS2
GO:0015144	carbohydrate transmembrane transporter activity	3/116	43/18432	0.00249525	0.0255964	0.0210126	3	AQP9/PPBP/SLC2A3
GO:0017017	MAP kinase tyrosine/serine/threonine phosphatase activity	2/116	13/18432	0.00292709	0.0290879	0.0238789	2	DUSP1/DUSP6
GO:0005161	platelet-derived growth factor receptor binding	2/116	14/18432	0.00340093	0.0318087	0.0261124	2	ITGA5/ITGB3
GO:0005172	vascular endothelial growth factor receptor binding	2/116	14/18432	0.00340093	0.0318087	0.0261124	2	ITGA5/ITGB3
GO:0033549	MAP kinase phosphatase activity	2/116	18/18432	0.00562491	0.0511063	0.0419542	2	DUSP1/DUSP6
GO:0008237	metallopeptidase activity	5/116	184/18432	0.00617183	0.0545179	0.0447548	5	ADAMTS3/ANPEP/CPA4/MME/MMP3
GO:0030246	carbohydrate binding	6/116	275/18432	0.00790419	0.0679334	0.0557679	6	GALNT15/OLR1/PTX3/SIGLEC12/SLC2A3/VTN
GO:0017134	fibroblast growth factor binding	2/116	23/18432	0.00911275	0.0762594	0.0626028	2	ITGB3/THBS1
GO:0005355	glucose transmembrane transporter activity	2/116	24/18432	0.00990061	0.0787098	0.0646145	2	PPBP/SLC2A3
GO:0015149	hexose transmembrane transporter activity	2/116	24/18432	0.00990061	0.0787098	0.0646145	2	PPBP/SLC2A3
GO:0030247	polysaccharide binding	2/116	25/18432	0.0107176	0.0831269	0.0682406	2	PTX3/VTN
GO:0043177	organic acid binding	4/116	137/18432	0.0110183	0.0834239	0.0684844	4	FOLR3/HBA1/HBA2/HBB
GO:0070696	transmembrane receptor protein serine/threonine kinase binding	2/116	26/18432	0.0115634	0.083639	0.0686609	2	GDF15/INHBA
GO:0020037	heme binding	4/116	139/18432	0.0115727	0.083639	0.0686609	4	HBA1/HBA2/HBB/PTGS2
GO:0019887	protein kinase regulator activity	5/116	218/18432	0.0122949	0.0848408	0.0696475	5	AREG/EREG/HBEGF/PKIB/SOCS3
GO:0015145	monosaccharide transmembrane transporter activity	2/116	27/18432	0.0124376	0.0848408	0.0696475	2	PPBP/SLC2A3
GO:0001618	virus receptor activity	3/116	77/18432	0.0126759	0.0848408	0.0696475	3	ANPEP/ITGA5/ITGB3
GO:0019955	cytokine binding	4/116	144/18432	0.0130365	0.0848408	0.0696475	4	ITGB3/NOG/THBS1/ZFP36
GO:0140272	exogenous protein binding	3/116	78/18432	0.0131235	0.0848408	0.0696475	3	ANPEP/ITGA5/ITGB3
GO:0043236	laminin binding	2/116	28/18432	0.0133397	0.0848408	0.0696475	2	NTN4/THBS1
GO:0051119	sugar transmembrane transporter activity	2/116	29/18432	0.0142695	0.0881659	0.0723772	2	PPBP/SLC2A3
GO:0046906	tetrapyrrole binding	4/116	149/18432	0.0146135	0.0881659	0.0723772	4	HBA1/HBA2/HBB/PTGS2
GO:0033218	amide binding	7/116	408/18432	0.0146943	0.0881659	0.0723772	7	ANPEP/FOLR3/FPR2/HLA-H/INHBA/MME/TGFB2
GO:0140104	molecular carrier activity	3/116	83/18432	0.0154966	0.0912576	0.0749152	3	HBA1/HBA2/HBB
GO:0033612	receptor serine/threonine kinase binding	2/116	31/18432	0.0162105	0.093726	0.0769415	2	GDF15/INHBA
GO:0042277	peptide binding	6/116	330/18432	0.0180853	0.101857	0.0836165	6	ANPEP/FPR2/HLA-H/INHBA/MME/TGFB2
GO:0019956	chemokine binding	2/116	33/18432	0.0182574	0.101857	0.0836165	2	ITGB3/ZFP36
GO:0019207	kinase regulator activity	5/116	246/18432	0.0197186	0.108113	0.0887518	5	AREG/EREG/HBEGF/PKIB/SOCS3
GO:0072341	modified amino acid binding	3/116	94/18432	0.0215161	0.112187	0.0920966	3	FOLR3/MME/THBS1
GO:0043394	proteoglycan binding	2/116	36/18432	0.0215201	0.112187	0.0920966	2	FN1/THBS1
GO:0071855	neuropeptide receptor binding	2/116	36/18432	0.0215201	0.112187	0.0920966	2	APLN/EDN1
GO:0004725	protein tyrosine phosphatase activity	3/116	98/18432	0.0239793	0.121038	0.0993629	3	DUSP1/DUSP6/PTPRR
GO:0008238	exopeptidase activity	3/116	98/18432	0.0239793	0.121038	0.0993629	3	ANPEP/CPA4/MME
GO:0008138	protein tyrosine/serine/threonine phosphatase activity	2/116	44/18432	0.0312825	0.155435	0.1276	2	DUSP1/DUSP6
GO:0004222	metalloendopeptidase activity	3/116	112/18432	0.0337509	0.16512	0.13555	3	ADAMTS3/MME/MMP3
GO:0048020	CCR chemokine receptor binding	2/116	47/18432	0.0353155	0.170156	0.139685	2	CCL20/CCL3L1
GO:0030295	protein kinase activator activity	3/116	115/18432	0.0360758	0.171226	0.140563	3	AREG/EREG/HBEGF
GO:0019209	kinase activator activity	3/116	121/18432	0.0409669	0.188892	0.155065	3	AREG/EREG/HBEGF
GO:0061980	regulatory RNA binding	2/116	51/18432	0.0409859	0.188892	0.155065	2	PIWIL2/SOCS3
GO:0042826	histone deacetylase binding	3/116	128/18432	0.0470738	0.21385	0.175554	3	CEBPB/MAGEA1/MAGEA6
GO:0019838	growth factor binding	3/116	132/18432	0.0507539	0.22732	0.186612	3	CCN1/ITGB3/THBS1
GO:0001786	phosphatidylserine binding	2/116	61/18432	0.0565069	0.249491	0.204812	2	MME/THBS1
GO:0061134	peptidase regulator activity	4/116	232/18432	0.0589696	0.249491	0.204812	4	FN1/SERPINE1/SPINK6/TIMP1
GO:0005114	type II transforming growth factor beta receptor binding	1/116	10/18432	0.0611958	0.249491	0.204812	1	TGFB2
GO:0005381	iron ion transmembrane transporter activity	1/116	10/18432	0.0611958	0.249491	0.204812	1	SLC11A1
GO:0005384	manganese ion transmembrane transporter activity	1/116	10/18432	0.0611958	0.249491	0.204812	1	SLC11A1
GO:0008190	eukaryotic initiation factor 4E binding	1/116	10/18432	0.0611958	0.249491	0.204812	1	C8orf88
GO:1990247	N6-methyladenosine-containing RNA binding	1/116	10/18432	0.0611958	0.249491	0.204812	1	IGF2BP1
GO:0008235	metalloexopeptidase activity	2/116	66/18432	0.0649194	0.25106	0.2061	2	ANPEP/CPA4
GO:0005536	glucose binding	1/116	11/18432	0.0671073	0.25106	0.2061	1	SLC2A3
GO:0008603	cAMP-dependent protein kinase regulator activity	1/116	11/18432	0.0671073	0.25106	0.2061	1	PKIB
GO:0015651	quaternary ammonium group transmembrane transporter activity	1/116	11/18432	0.0671073	0.25106	0.2061	1	SLC22A4
GO:0019864	IgG binding	1/116	11/18432	0.0671073	0.25106	0.2061	1	FCGR2A
GO:0070697	activin receptor binding	1/116	11/18432	0.0671073	0.25106	0.2061	1	INHBA
GO:1901612	cardiolipin binding	1/116	11/18432	0.0671073	0.25106	0.2061	1	MME
GO:0004860	protein kinase inhibitor activity	2/116	70/18432	0.0719314	0.260767	0.214069	2	PKIB/SOCS3
GO:0004875	complement receptor activity	1/116	12/18432	0.0729819	0.260767	0.214069	1	FPR2
GO:0046790	virion binding	1/116	12/18432	0.0729819	0.260767	0.214069	1	PTX3
GO:0055056	D-glucose transmembrane transporter activity	1/116	12/18432	0.0729819	0.260767	0.214069	1	SLC2A3
GO:0005542	folic acid binding	1/116	13/18432	0.0788198	0.265032	0.21757	1	FOLR3
GO:0008253	5'-nucleotidase activity	1/116	13/18432	0.0788198	0.265032	0.21757	1	NT5E
GO:0015166	polyol transmembrane transporter activity	1/116	13/18432	0.0788198	0.265032	0.21757	1	AQP9
GO:0031994	insulin-like growth factor I binding	1/116	13/18432	0.0788198	0.265032	0.21757	1	ITGB3
GO:0035259	nuclear glucocorticoid receptor binding	1/116	13/18432	0.0788198	0.265032	0.21757	1	CEBPB
GO:0019210	kinase inhibitor activity	2/116	74/18432	0.0791762	0.265032	0.21757	2	PKIB/SOCS3
GO:0042578	phosphoric ester hydrolase activity	5/116	365/18432	0.0807897	0.266988	0.219176	5	DUSP1/DUSP6/NT5E/PDE4B/PTPRR
GO:0017018	myosin phosphatase activity	2/116	76/18432	0.082881	0.266988	0.219176	2	DUSP1/DUSP6
GO:0015250	water channel activity	1/116	14/18432	0.0846212	0.266988	0.219176	1	AQP9
GO:0005041	low-density lipoprotein particle receptor activity	1/116	15/18432	0.0903865	0.266988	0.219176	1	OLR1
GO:0008252	nucleotidase activity	1/116	15/18432	0.0903865	0.266988	0.219176	1	NT5E
GO:0036041	long-chain fatty acid binding	1/116	15/18432	0.0903865	0.266988	0.219176	1	FABP4
GO:0048185	activin binding	1/116	15/18432	0.0903865	0.266988	0.219176	1	FSTL3
GO:0070700	BMP receptor binding	1/116	15/18432	0.0903865	0.266988	0.219176	1	GDF15
GO:1901611	phosphatidylglycerol binding	1/116	15/18432	0.0903865	0.266988	0.219176	1	MME
GO:0031406	carboxylic acid binding	3/116	171/18432	0.0933975	0.266988	0.219176	3	FABP4/FOLR3/SIGLEC12
GO:0038024	cargo receptor activity	2/116	82/18432	0.094302	0.266988	0.219176	2	OLR1/VTN
GO:0008191	metalloendopeptidase inhibitor activity	1/116	16/18432	0.0961157	0.266988	0.219176	1	TIMP1
GO:0016641	oxidoreductase activity, acting on the CH-NH2 group of donors, oxygen as acceptor	1/116	16/18432	0.0961157	0.266988	0.219176	1	IL4I1
GO:0022841	potassium ion leak channel activity	1/116	16/18432	0.0961157	0.266988	0.219176	1	KCNK13
GO:0046935	1-phosphatidylinositol-3-kinase regulator activity	1/116	16/18432	0.0961157	0.266988	0.219176	1	SOCS3
GO:0016791	phosphatase activity	4/116	276/18432	0.0967085	0.266988	0.219176	4	DUSP1/DUSP6/NT5E/PTPRR
GO:0001540	amyloid-beta binding	2/116	85/18432	0.100174	0.266988	0.219176	2	FPR2/TGFB2
GO:0015171	amino acid transmembrane transporter activity	2/116	85/18432	0.100174	0.266988	0.219176	2	SLC22A4/SLC7A2
GO:0004721	phosphoprotein phosphatase activity	3/116	177/18432	0.100955	0.266988	0.219176	3	DUSP1/DUSP6/PTPRR
GO:0004115	3',5'-cyclic-AMP phosphodiesterase activity	1/116	17/18432	0.101809	0.266988	0.219176	1	PDE4B
GO:0005001	transmembrane receptor protein tyrosine phosphatase activity	1/116	17/18432	0.101809	0.266988	0.219176	1	PTPRR
GO:0005149	interleukin-1 receptor binding	1/116	17/18432	0.101809	0.266988	0.219176	1	IL1B
GO:0005324	long-chain fatty acid transporter activity	1/116	17/18432	0.101809	0.266988	0.219176	1	FABP4
GO:0005372	water transmembrane transporter activity	1/116	17/18432	0.101809	0.266988	0.219176	1	AQP9
GO:0019198	transmembrane receptor protein phosphatase activity	1/116	17/18432	0.101809	0.266988	0.219176	1	PTPRR
GO:0030169	low-density lipoprotein particle binding	1/116	17/18432	0.101809	0.266988	0.219176	1	THBS1
GO:0004857	enzyme inhibitor activity	5/116	395/18432	0.104122	0.266988	0.219176	5	PKIB/SERPINE1/SOCS3/SPINK6/TIMP1
GO:0004866	endopeptidase inhibitor activity	3/116	180/18432	0.104823	0.266988	0.219176	3	SERPINE1/SPINK6/TIMP1
GO:0003756	protein disulfide isomerase activity	1/116	18/18432	0.107467	0.266988	0.219176	1	ITGB3
GO:0015174	basic amino acid transmembrane transporter activity	1/116	18/18432	0.107467	0.266988	0.219176	1	SLC7A2
GO:0016864	intramolecular oxidoreductase activity, transposing S-S bonds	1/116	18/18432	0.107467	0.266988	0.219176	1	ITGB3
GO:0030228	lipoprotein particle receptor activity	1/116	18/18432	0.107467	0.266988	0.219176	1	OLR1
GO:0042834	peptidoglycan binding	1/116	18/18432	0.107467	0.266988	0.219176	1	NLRP3
GO:0004653	polypeptide N-acetylgalactosaminyltransferase activity	1/116	19/18432	0.11309	0.268377	0.220316	1	GALNT15
GO:0005452	solute:inorganic anion antiporter activity	1/116	19/18432	0.11309	0.268377	0.220316	1	SLC4A4
GO:0005520	insulin-like growth factor binding	1/116	19/18432	0.11309	0.268377	0.220316	1	ITGB3
GO:0022840	leak channel activity	1/116	19/18432	0.11309	0.268377	0.220316	1	KCNK13
GO:0022842	narrow pore channel activity	1/116	19/18432	0.11309	0.268377	0.220316	1	KCNK13
GO:0035014	phosphatidylinositol 3-kinase regulator activity	1/116	19/18432	0.11309	0.268377	0.220316	1	SOCS3
GO:0030414	peptidase inhibitor activity	3/116	187/18432	0.114072	0.268704	0.220584	3	SERPINE1/SPINK6/TIMP1
GO:0015297	antiporter activity	2/116	93/18432	0.116303	0.269566	0.221293	2	SLC11A1/SLC4A4
GO:0008514	organic anion transmembrane transporter activity	3/116	190/18432	0.118129	0.269566	0.221293	3	SLC2A3/SLC4A4/SLC7A2
GO:0000979	RNA polymerase II core promoter sequence-specific DNA binding	1/116	20/18432	0.118677	0.269566	0.221293	1	CEBPB
GO:0016638	oxidoreductase activity, acting on the CH-NH2 group of donors	1/116	20/18432	0.118677	0.269566	0.221293	1	IL4I1
GO:0051139	metal cation:proton antiporter activity	1/116	20/18432	0.118677	0.269566	0.221293	1	SLC11A1
GO:0061135	endopeptidase regulator activity	3/116	194/18432	0.12362	0.278204	0.228384	3	SERPINE1/SPINK6/TIMP1
GO:0001846	opsonin binding	1/116	21/18432	0.12423	0.278204	0.228384	1	PTX3
GO:0004867	serine-type endopeptidase inhibitor activity	2/116	98/18432	0.126696	0.280055	0.229903	2	SERPINE1/SPINK6
GO:0015106	bicarbonate transmembrane transporter activity	1/116	22/18432	0.129747	0.280055	0.229903	1	SLC4A4
GO:0030742	GTP-dependent protein binding	1/116	22/18432	0.129747	0.280055	0.229903	1	RAB32
GO:0033691	sialic acid binding	1/116	22/18432	0.129747	0.280055	0.229903	1	SIGLEC12
GO:0004722	protein serine/threonine phosphatase activity	2/116	101/18432	0.133034	0.280055	0.229903	2	DUSP1/DUSP6
GO:0008093	cytoskeletal anchor activity	1/116	23/18432	0.135231	0.280055	0.229903	1	SYN1
GO:0030215	semaphorin receptor binding	1/116	23/18432	0.135231	0.280055	0.229903	1	SEMA3B
GO:0030552	cAMP binding	1/116	23/18432	0.135231	0.280055	0.229903	1	PDE4B
GO:0035035	histone acetyltransferase binding	1/116	23/18432	0.135231	0.280055	0.229903	1	CEBPB
GO:0004114	3',5'-cyclic-nucleotide phosphodiesterase activity	1/116	24/18432	0.14068	0.280055	0.229903	1	PDE4B
GO:0005160	transforming growth factor beta receptor binding	1/116	24/18432	0.14068	0.280055	0.229903	1	TGFB2
GO:0005540	hyaluronic acid binding	1/116	24/18432	0.14068	0.280055	0.229903	1	TNFAIP6
GO:0008483	transaminase activity	1/116	24/18432	0.14068	0.280055	0.229903	1	BCAT1
GO:0016702	oxidoreductase activity, acting on single donors with incorporation of molecular oxygen, incorporation of two atoms of oxygen	1/116	24/18432	0.14068	0.280055	0.229903	1	PTGS2
GO:0019865	immunoglobulin binding	1/116	24/18432	0.14068	0.280055	0.229903	1	FCGR2A
GO:0019957	C-C chemokine binding	1/116	24/18432	0.14068	0.280055	0.229903	1	ZFP36
GO:0005112	Notch binding	1/116	25/18432	0.146095	0.280055	0.229903	1	DNER
GO:0005227	calcium activated cation channel activity	1/116	25/18432	0.146095	0.280055	0.229903	1	CATSPER1
GO:0015271	outward rectifier potassium channel activity	1/116	25/18432	0.146095	0.280055	0.229903	1	KCNK13
GO:0016701	oxidoreductase activity, acting on single donors with incorporation of molecular oxygen	1/116	25/18432	0.146095	0.280055	0.229903	1	PTGS2
GO:0016769	transferase activity, transferring nitrogenous groups	1/116	25/18432	0.146095	0.280055	0.229903	1	BCAT1
GO:0050431	transforming growth factor beta binding	1/116	25/18432	0.146095	0.280055	0.229903	1	THBS1
GO:0001848	complement binding	1/116	26/18432	0.151476	0.280055	0.229903	1	PTX3
GO:0004112	cyclic-nucleotide phosphodiesterase activity	1/116	26/18432	0.151476	0.280055	0.229903	1	PDE4B
GO:0004190	aspartic-type endopeptidase activity	1/116	26/18432	0.151476	0.280055	0.229903	1	CTSE
GO:0030507	spectrin binding	1/116	26/18432	0.151476	0.280055	0.229903	1	PTPRN
GO:0035925	mRNA 3'-UTR AU-rich region binding	1/116	26/18432	0.151476	0.280055	0.229903	1	ZFP36
GO:0048027	mRNA 5'-UTR binding	1/116	26/18432	0.151476	0.280055	0.229903	1	IGF2BP1
GO:0070006	metalloaminopeptidase activity	1/116	26/18432	0.151476	0.280055	0.229903	1	ANPEP
GO:0072349	modified amino acid transmembrane transporter activity	1/116	26/18432	0.151476	0.280055	0.229903	1	SLC22A4
GO:0023026	MHC class II protein complex binding	1/116	27/18432	0.156824	0.286609	0.235283	1	HLA-DRB4
GO:0070001	aspartic-type peptidase activity	1/116	27/18432	0.156824	0.286609	0.235283	1	CTSE
GO:0016645	oxidoreductase activity, acting on the CH-NH group of donors	1/116	28/18432	0.162138	0.289663	0.23779	1	IL4I1
GO:0043495	protein-membrane adaptor activity	1/116	28/18432	0.162138	0.289663	0.23779	1	SYN1
GO:0045499	chemorepellent activity	1/116	28/18432	0.162138	0.289663	0.23779	1	SEMA3B
GO:0051019	mitogen-activated protein kinase binding	1/116	28/18432	0.162138	0.289663	0.23779	1	DUSP1
GO:0004181	metallocarboxypeptidase activity	1/116	29/18432	0.167419	0.295774	0.242807	1	CPA4
GO:0015101	organic cation transmembrane transporter activity	1/116	29/18432	0.167419	0.295774	0.242807	1	SLC22A4
GO:0005451	monovalent cation:proton antiporter activity	1/116	30/18432	0.172667	0.298414	0.244974	1	SLC11A1
GO:0015299	solute:proton antiporter activity	1/116	30/18432	0.172667	0.298414	0.244974	1	SLC11A1
GO:0071813	lipoprotein particle binding	1/116	30/18432	0.172667	0.298414	0.244974	1	THBS1
GO:0071814	protein-lipid complex binding	1/116	30/18432	0.172667	0.298414	0.244974	1	THBS1
GO:0071889	14-3-3 protein binding	1/116	31/18432	0.177882	0.304122	0.24966	1	ZFP36
GO:0140323	solute:anion antiporter activity	1/116	31/18432	0.177882	0.304122	0.24966	1	SLC4A4
GO:0031369	translation initiation factor binding	1/116	32/18432	0.183065	0.306393	0.251524	1	C8orf88
GO:0051427	hormone receptor binding	1/116	32/18432	0.183065	0.306393	0.251524	1	FABP4
GO:0090482	vitamin transmembrane transporter activity	1/116	32/18432	0.183065	0.306393	0.251524	1	SLC2A3
GO:0140828	metal cation:monoatomic cation antiporter activity	1/116	32/18432	0.183065	0.306393	0.251524	1	SLC11A1
GO:0030291	protein serine/threonine kinase inhibitor activity	1/116	33/18432	0.188215	0.313364	0.257247	1	PKIB
GO:0008376	acetylgalactosaminyltransferase activity	1/116	34/18432	0.193333	0.318549	0.261504	1	GALNT15
GO:0043015	gamma-tubulin binding	1/116	34/18432	0.193333	0.318549	0.261504	1	PDE4B
GO:0097718	disordered domain specific binding	1/116	35/18432	0.198419	0.325244	0.267	1	FN1
GO:0015291	secondary active transmembrane transporter activity	3/116	246/18432	0.202182	0.32845	0.269631	3	SLC11A1/SLC22A4/SLC4A4
GO:0023023	MHC protein complex binding	1/116	36/18432	0.203474	0.32845	0.269631	1	HLA-DRB4
GO:0042887	amide transmembrane transporter activity	1/116	36/18432	0.203474	0.32845	0.269631	1	AQP9
GO:0030551	cyclic nucleotide binding	1/116	37/18432	0.208496	0.331509	0.272143	1	PDE4B
GO:0035198	miRNA binding	1/116	37/18432	0.208496	0.331509	0.272143	1	SOCS3
GO:0042605	peptide antigen binding	1/116	37/18432	0.208496	0.331509	0.272143	1	HLA-H
GO:0004177	aminopeptidase activity	1/116	39/18432	0.218448	0.343893	0.282309	1	ANPEP
GO:0046915	transition metal ion transmembrane transporter activity	1/116	39/18432	0.218448	0.343893	0.282309	1	SLC11A1
GO:0008194	UDP-glycosyltransferase activity	2/116	142/18432	0.224913	0.352327	0.289233	2	GALNT15/HAS1
GO:0015293	symporter activity	2/116	145/18432	0.231869	0.361444	0.296716	2	SLC22A4/SLC4A4
GO:0015298	solute:cation antiporter activity	1/116	42/18432	0.233143	0.361655	0.29689	1	SLC11A1
GO:0008528	G protein-coupled peptide receptor activity	2/116	147/18432	0.236515	0.365105	0.299722	2	FPR2/GPR84
GO:0001046	core promoter sequence-specific DNA binding	1/116	44/18432	0.242787	0.367648	0.30181	1	CEBPB
GO:0004180	carboxypeptidase activity	1/116	44/18432	0.242787	0.367648	0.30181	1	CPA4
GO:0005245	voltage-gated calcium channel activity	1/116	44/18432	0.242787	0.367648	0.30181	1	CATSPER1
GO:0022839	ion gated channel activity	1/116	44/18432	0.242787	0.367648	0.30181	1	CATSPER1
GO:0022843	voltage-gated cation channel activity	2/116	151/18432	0.24582	0.370478	0.304133	2	CATSPER1/KCNK13
GO:0016504	peptidase activator activity	1/116	45/18432	0.247564	0.371345	0.304845	1	FN1
GO:0001653	peptide receptor activity	2/116	153/18432	0.250479	0.372207	0.305552	2	FPR2/GPR84
GO:0005506	iron ion binding	2/116	153/18432	0.250479	0.372207	0.305552	2	HBA1/HBA2
GO:0001784	phosphotyrosine residue binding	1/116	46/18432	0.252311	0.373185	0.306355	1	SOCS3
GO:0022853	active ion transmembrane transporter activity	3/116	278/18432	0.255175	0.375674	0.308399	3	SLC11A1/SLC22A4/SLC4A4
GO:0005044	scavenger receptor activity	1/116	47/18432	0.257028	0.376658	0.309206	1	VTN
GO:0015026	coreceptor activity	1/116	48/18432	0.261716	0.381769	0.313402	1	ITGB3
GO:0005504	fatty acid binding	1/116	49/18432	0.266374	0.385032	0.31608	1	FABP4
GO:0070888	E-box binding	1/116	49/18432	0.266374	0.385032	0.31608	1	SNAI1
GO:0016860	intramolecular oxidoreductase activity	1/116	51/18432	0.275604	0.39657	0.325552	1	ITGB3
GO:0046943	carboxylic acid transmembrane transporter activity	2/116	165/18432	0.278463	0.396856	0.325787	2	SLC22A4/SLC7A2
GO:0017046	peptide hormone binding	1/116	52/18432	0.280175	0.396856	0.325787	1	INHBA
GO:0004175	endopeptidase activity	4/116	426/18432	0.280644	0.396856	0.325787	4	ADAMTS3/CTSE/MME/MMP3
GO:0005342	organic acid transmembrane transporter activity	2/116	166/18432	0.280794	0.396856	0.325787	2	SLC22A4/SLC7A2
GO:1901618	organic hydroxy compound transmembrane transporter activity	1/116	53/18432	0.284718	0.400621	0.328878	1	AQP9
GO:0005080	protein kinase C binding	1/116	55/18432	0.293719	0.411058	0.337446	1	ITGB3
GO:0046873	metal ion transmembrane transporter activity	4/116	436/18432	0.294721	0.411058	0.337446	4	CATSPER1/KCNK13/SLC11A1/SLC4A4
GO:0008509	anion transmembrane transporter activity	3/116	303/18432	0.297832	0.413583	0.339519	3	SLC2A3/SLC4A4/SLC7A2
GO:0045309	protein phosphorylated amino acid binding	1/116	58/18432	0.30701	0.424475	0.34846	1	SOCS3
GO:0070063	RNA polymerase binding	1/116	59/18432	0.311385	0.42866	0.351896	1	ZFP36
GO:0008080	N-acetyltransferase activity	1/116	62/18432	0.324347	0.444579	0.364964	1	SAT1
GO:0015179	L-amino acid transmembrane transporter activity	1/116	66/18432	0.341253	0.463754	0.380705	1	SLC7A2
GO:0097110	scaffold protein binding	1/116	66/18432	0.341253	0.463754	0.380705	1	TREM1
GO:0016758	hexosyltransferase activity	2/116	195/18432	0.347865	0.470728	0.38643	2	GALNT15/HAS1
GO:0030276	clathrin binding	1/116	69/18432	0.353657	0.476538	0.3912	1	DNER
GO:0005244	voltage-gated ion channel activity	2/116	201/18432	0.361523	0.483044	0.39654	2	CATSPER1/KCNK13
GO:0022832	voltage-gated channel activity	2/116	201/18432	0.361523	0.483044	0.39654	2	CATSPER1/KCNK13
GO:0004521	endoribonuclease activity	1/116	72/18432	0.365829	0.484724	0.39792	1	PIWIL2
GO:0048029	monosaccharide binding	1/116	72/18432	0.365829	0.484724	0.39792	1	SLC2A3
GO:0015370	solute:sodium symporter activity	1/116	76/18432	0.381706	0.503662	0.413467	1	SLC4A4
GO:0030971	receptor tyrosine kinase binding	1/116	77/18432	0.385614	0.506716	0.415973	1	ITGAX
GO:0033293	monocarboxylic acid binding	1/116	81/18432	0.401	0.522614	0.429025	1	FABP4
GO:0048306	calcium-dependent protein binding	1/116	81/18432	0.401	0.522614	0.429025	1	SYN1
GO:0030165	PDZ domain binding	1/116	82/18432	0.404786	0.525396	0.431308	1	SLC22A4
GO:0042562	hormone binding	1/116	87/18432	0.423365	0.54534	0.44768	1	INHBA
GO:0008081	phosphoric diester hydrolase activity	1/116	88/18432	0.427011	0.54534	0.44768	1	PDE4B
GO:0016407	acetyltransferase activity	1/116	88/18432	0.427011	0.54534	0.44768	1	SAT1
GO:0016410	N-acyltransferase activity	1/116	88/18432	0.427011	0.54534	0.44768	1	SAT1
GO:0051219	phosphoprotein binding	1/116	92/18432	0.441369	0.561311	0.460792	1	SOCS3
GO:0003730	mRNA 3'-UTR binding	2/116	238/18432	0.443047	0.561311	0.460792	2	IGF2BP1/ZFP36
GO:0051213	dioxygenase activity	1/116	93/18432	0.444902	0.561424	0.460884	1	PTGS2
GO:0005249	voltage-gated potassium channel activity	1/116	99/18432	0.465642	0.582969	0.478571	1	KCNK13
GO:0008170	N-methyltransferase activity	1/116	99/18432	0.465642	0.582969	0.478571	1	NNMT
GO:0051087	chaperone binding	1/116	105/18432	0.485613	0.605587	0.497139	1	FN1
GO:0022804	active transmembrane transporter activity	3/116	417/18432	0.489929	0.608583	0.499598	3	SLC11A1/SLC22A4/SLC4A4
GO:0015294	solute:cation symporter activity	1/116	109/18432	0.498514	0.616838	0.506375	1	SLC4A4
GO:0016757	glycosyltransferase activity	2/116	267/18432	0.502841	0.619781	0.508791	2	GALNT15/HAS1
GO:0031490	chromatin DNA binding	1/116	118/18432	0.52638	0.644992	0.529487	1	CEBPB
GO:0005262	calcium channel activity	1/116	119/18432	0.52938	0.644992	0.529487	1	CATSPER1
GO:1990782	protein tyrosine kinase binding	1/116	119/18432	0.52938	0.644992	0.529487	1	ITGAX
GO:0004540	ribonuclease activity	1/116	122/18432	0.538267	0.650832	0.534282	1	PIWIL2
GO:0005267	potassium channel activity	1/116	122/18432	0.538267	0.650832	0.534282	1	KCNK13
GO:0031072	heat shock protein binding	1/116	124/18432	0.544099	0.655392	0.538025	1	ZFP36
GO:0004519	endonuclease activity	1/116	125/18432	0.546988	0.656385	0.53884	1	PIWIL2
GO:0044325	transmembrane transporter binding	1/116	128/18432	0.555545	0.664148	0.545213	1	PDE4B
GO:0015085	calcium ion transmembrane transporter activity	1/116	135/18432	0.574894	0.684705	0.562089	1	CATSPER1
GO:0015078	proton transmembrane transporter activity	1/116	136/18432	0.577589	0.685349	0.562616	1	SLC11A1
GO:0016922	nuclear receptor binding	1/116	139/18432	0.585573	0.692239	0.568273	1	CEBPB
GO:0044389	ubiquitin-like protein ligase binding	2/116	318/18432	0.597551	0.703483	0.577503	2	CEBPB/PTPRN
GO:0061630	ubiquitin protein ligase activity	2/116	322/18432	0.604387	0.703483	0.577503	2	LONRF3/MEFV
GO:0015267	channel activity	3/116	494/18432	0.604768	0.703483	0.577503	3	AQP9/CATSPER1/KCNK13
GO:0001227	DNA-binding transcription repressor activity, RNA polymerase II-specific	2/116	323/18432	0.606082	0.703483	0.577503	2	CEBPB/SNAI1
GO:0022803	passive transmembrane transporter activity	3/116	495/18432	0.606145	0.703483	0.577503	3	AQP9/CATSPER1/KCNK13
GO:0140375	immune receptor activity	1/116	148/18432	0.608639	0.703514	0.577529	1	FPR2
GO:0019842	vitamin binding	1/116	149/18432	0.611122	0.703514	0.577529	1	FOLR3
GO:0001217	DNA-binding transcription repressor activity	2/116	327/18432	0.612809	0.703514	0.577529	2	CEBPB/SNAI1
GO:0052689	carboxylic ester hydrolase activity	1/116	152/18432	0.618477	0.706794	0.580222	1	TNFAIP6
GO:0061659	ubiquitin-like protein ligase activity	2/116	334/18432	0.624373	0.706794	0.580222	2	LONRF3/MEFV
GO:0015081	sodium ion transmembrane transporter activity	1/116	156/18432	0.62807	0.706794	0.580222	1	SLC4A4
GO:0016853	isomerase activity	1/116	156/18432	0.62807	0.706794	0.580222	1	ITGB3
GO:0015079	potassium ion transmembrane transporter activity	1/116	158/18432	0.632777	0.706794	0.580222	1	KCNK13
GO:0015103	inorganic anion transmembrane transporter activity	1/116	159/18432	0.635108	0.706794	0.580222	1	SLC4A4
GO:0043021	ribonucleoprotein complex binding	1/116	159/18432	0.635108	0.706794	0.580222	1	PIWIL2
GO:0022836	gated channel activity	2/116	341/18432	0.63567	0.706794	0.580222	2	CATSPER1/KCNK13
GO:0046982	protein heterodimerization activity	2/116	341/18432	0.63567	0.706794	0.580222	2	BCL2A1/CEBPB
GO:0005319	lipid transporter activity	1/116	161/18432	0.639726	0.708159	0.581342	1	FABP4
GO:0008757	S-adenosylmethionine-dependent methyltransferase activity	1/116	162/18432	0.642014	0.708159	0.581342	1	NNMT
GO:0005261	cation channel activity	2/116	346/18432	0.643578	0.708159	0.581342	2	CATSPER1/KCNK13
GO:0003823	antigen binding	1/116	171/18432	0.661962	0.725876	0.595886	1	HLA-H
GO:0004252	serine-type endopeptidase activity	1/116	174/18432	0.668364	0.730377	0.599581	1	MMP3
GO:0016705	oxidoreductase activity, acting on paired donors, with incorporation or reduction of molecular oxygen	1/116	179/18432	0.678767	0.739205	0.606828	1	PTGS2
GO:0008022	protein C-terminus binding	1/116	181/18432	0.682837	0.7411	0.608384	1	FN1
GO:0008236	serine-type peptidase activity	1/116	192/18432	0.704325	0.761821	0.625395	1	MMP3
GO:0017171	serine hydrolase activity	1/116	196/18432	0.711776	0.767271	0.629868	1	MMP3
GO:0004518	nuclease activity	1/116	208/18432	0.73303	0.787512	0.646484	1	PIWIL2
GO:0008168	methyltransferase activity	1/116	212/18432	0.739763	0.792069	0.650226	1	NNMT
GO:0016747	acyltransferase activity, transferring groups other than amino-acyl groups	1/116	221/18432	0.754303	0.804928	0.660781	1	SAT1
GO:0016741	transferase activity, transferring one-carbon groups	1/116	225/18432	0.760504	0.808831	0.663986	1	NNMT
GO:0003779	actin binding	2/116	439/18432	0.767169	0.81282	0.66726	2	MEFV/SYN1
GO:0004842	ubiquitin-protein transferase activity	2/116	441/18432	0.769367	0.81282	0.66726	2	LONRF3/MEFV
GO:0005216	ion channel activity	2/116	446/18432	0.774785	0.815833	0.669734	2	CATSPER1/KCNK13
GO:0016746	acyltransferase activity	1/116	248/18432	0.793265	0.830964	0.682155	1	SAT1
GO:0019787	ubiquitin-like protein transferase activity	2/116	465/18432	0.79438	0.830964	0.682155	2	LONRF3/MEFV
GO:0005543	phospholipid binding	2/116	474/18432	0.803131	0.8366	0.686782	2	MME/THBS1
GO:0140297	DNA-binding transcription factor binding	2/116	476/18432	0.805031	0.8366	0.686782	2	CEBPB/NLRP3
GO:0003924	GTPase activity	1/116	331/18432	0.878603	0.910084	0.747107	1	RAB32
GO:0030674	protein-macromolecule adaptor activity	1/116	347/18432	0.890475	0.918566	0.75407	1	SYN1
GO:0061629	RNA polymerase II-specific DNA-binding transcription factor binding	1/116	350/18432	0.892569	0.918566	0.75407	1	CEBPB
GO:0015631	tubulin binding	1/116	375/18432	0.908545	0.931271	0.764499	1	PDE4B
GO:0005525	GTP binding	1/116	379/18432	0.910873	0.931271	0.764499	1	RAB32
GO:0140098	catalytic activity, acting on RNA	1/116	384/18432	0.9137	0.931271	0.764499	1	PIWIL2
GO:0019001	guanyl nucleotide binding	1/116	401/18432	0.922664	0.934417	0.767082	1	RAB32
GO:0032561	guanyl ribonucleotide binding	1/116	401/18432	0.922664	0.934417	0.767082	1	RAB32
GO:0045182	translation regulator activity	1/116	407/18432	0.925602	0.934417	0.767082	1	IGF2BP1
GO:0001228	DNA-binding transcription activator activity, RNA polymerase II-specific	1/116	468/18432	0.949854	0.954137	0.783271	1	CEBPB
GO:0001216	DNA-binding transcription activator activity	1/116	472/18432	0.951137	0.954137	0.783271	1	CEBPB
GO:0060090	molecular adaptor activity	1/116	492/18432	0.957079	0.957079	0.785686	1	SYN1

## Sheet: TableS9
ID	Description	GeneRatio	BgRatio	pvalue	p.adjust	qvalue	Count	geneID
hsa00220	Arginine biosynthesis	1/5	22/8577	0.0127623	0.144087	0.12892	1	NOS1
hsa00330	Arginine and proline metabolism	1/5	50/8577	0.0288165	0.144087	0.12892	1	NOS1
hsa04730	Long-term depression	1/5	60/8577	0.0344992	0.144087	0.12892	1	NOS1
hsa04970	Salivary secretion	1/5	93/8577	0.0530638	0.144087	0.12892	1	NOS1
hsa04657	IL-17 signaling pathway	1/5	94/8577	0.0536219	0.144087	0.12892	1	S100A7A
hsa04713	Circadian entrainment	1/5	97/8577	0.0552946	0.144087	0.12892	1	NOS1
hsa04061	Viral protein interaction with cytokine and cytokine receptor	1/5	100/8577	0.0569648	0.144087	0.12892	1	IL19
hsa04926	Relaxin signaling pathway	1/5	129/8577	0.0729893	0.144087	0.12892	1	NOS1
hsa04371	Apelin signaling pathway	1/5	139/8577	0.0784642	0.144087	0.12892	1	NOS1
hsa04145	Phagosome	1/5	152/8577	0.0855429	0.144087	0.12892	1	NOS1
hsa04630	JAK-STAT signaling pathway	1/5	166/8577	0.0931173	0.144087	0.12892	1	IL19
hsa03010	Ribosome	1/5	167/8577	0.0936564	0.144087	0.12892	1	RPS9
hsa04022	cGMP-PKG signaling pathway	1/5	167/8577	0.0936564	0.144087	0.12892	1	ADRA2B
hsa05171	Coronavirus disease - COVID-19	1/5	232/8577	0.128152	0.183075	0.163804	1	RPS9
hsa04020	Calcium signaling pathway	1/5	253/8577	0.13907	0.185426	0.165908	1	NOS1
hsa04060	Cytokine-cytokine receptor interaction	1/5	297/8577	0.16159	0.201987	0.180726	1	IL19
hsa05014	Amyotrophic lateral sclerosis	1/5	364/8577	0.194975	0.215506	0.192822	1	NOS1
hsa04080	Neuroactive ligand-receptor interaction	1/5	367/8577	0.196444	0.215506	0.192822	1	ADRA2B
hsa05010	Alzheimer disease	1/5	384/8577	0.204731	0.215506	0.192822	1	NOS1
hsa05022	Pathways of neurodegeneration - multiple diseases	1/5	476/8577	0.248401	0.248401	0.222253	1	NOS1

## Sheet: TableS10
ID	Description	GeneRatio	BgRatio	pvalue	p.adjust	qvalue	Count	geneID
hsa05323	Rheumatoid arthritis	12/75	93/8577	1.90585e-11	3.20182e-09	2.18671e-09	12	CCL20/CCL3L1/CSF2/CXCL2/CXCL3/CXCL8/HLA-DRB4/IL11/IL1B/IL6/MMP3/TGFB2
hsa04668	TNF signaling pathway	11/75	114/8577	3.36892e-09	2.82989e-07	1.9327e-07	11	CCL20/CEBPB/CSF2/CXCL2/CXCL3/EDN1/IL1B/IL6/MMP3/PTGS2/SOCS3
hsa04657	IL-17 signaling pathway	10/75	94/8577	7.08667e-09	3.91982e-07	2.67707e-07	10	CCL20/CEBPB/CSF2/CXCL2/CXCL3/CXCL8/IL1B/IL6/MMP3/PTGS2
hsa05144	Malaria	8/75	50/8577	9.33291e-09	3.91982e-07	2.67707e-07	8	CXCL8/HBA1/HBA2/HBB/IL1B/IL6/TGFB2/THBS1
hsa04640	Hematopoietic cell lineage	9/75	99/8577	1.68472e-07	5.66067e-06	3.86599e-06	9	ANPEP/CSF2/HLA-DRB4/IL11/IL1B/IL6/ITGA5/ITGB3/MME
hsa04060	Cytokine-cytokine receptor interaction	14/75	297/8577	2.19365e-07	6.14222e-06	4.19487e-06	14	CCL20/CCL3L1/CSF2/CXCL2/CXCL3/CXCL8/GDF15/IL11/IL1B/IL6/INHBA/OSM/PPBP/TGFB2
hsa05146	Amoebiasis	8/75	102/8577	2.65172e-06	6.36413e-05	4.34643e-05	8	CSF2/CXCL2/CXCL3/CXCL8/FN1/IL1B/IL6/TGFB2
hsa05143	African trypanosomiasis	5/75	37/8577	1.56556e-05	0.000328768	0.000224534	5	HBA1/HBA2/HBB/IL1B/IL6
hsa05135	Yersinia infection	8/75	137/8577	2.36693e-05	0.000375737	0.000256612	8	CXCL8/FCGR2A/FN1/IL1B/IL6/ITGA5/MEFV/NLRP3
hsa04061	Viral protein interaction with cytokine and cytokine receptor	7/75	100/8577	2.46018e-05	0.000375737	0.000256612	7	CCL20/CCL3L1/CXCL2/CXCL3/CXCL8/IL6/PPBP
hsa04933	AGE-RAGE signaling pathway in diabetic complications	7/75	100/8577	2.46018e-05	0.000375737	0.000256612	7	CXCL8/EDN1/FN1/IL1B/IL6/SERPINE1/TGFB2
hsa05417	Lipid and atherosclerosis	9/75	215/8577	9.88095e-05	0.00138333	0.000944757	9	CCL3L1/CXCL2/CXCL3/CXCL8/IL1B/IL6/MMP3/NLRP3/OLR1
hsa04512	ECM-receptor interaction	6/75	89/8577	0.00011946	0.00144679	0.000988093	6	FN1/IBSP/ITGA5/ITGB3/THBS1/VTN
hsa05134	Legionellosis	5/75	56/8577	0.000120565	0.00144679	0.000988093	5	CXCL2/CXCL3/CXCL8/IL1B/IL6
hsa05171	Coronavirus disease - COVID-19	9/75	232/8577	0.000176231	0.00197379	0.00134801	9	CSF2/CXCL8/FCGR2A/FGA/HBEGF/IL1B/IL6/MMP3/NLRP3
hsa05142	Chagas disease	6/75	102/8577	0.000253095	0.0026575	0.00181496	6	CCL3L1/CXCL8/IL1B/IL6/SERPINE1/TGFB2
hsa04064	NF-kappa B signaling pathway	6/75	104/8577	0.000281303	0.00277994	0.00189858	6	BCL2A1/CXCL2/CXCL3/CXCL8/IL1B/PTGS2
hsa05205	Proteoglycans in cancer	8/75	205/8577	0.000396876	0.00370417	0.00252979	8	FN1/HBEGF/ITGA5/ITGB3/PLAUR/TGFB2/THBS1/VTN
hsa05133	Pertussis	5/75	76/8577	0.000509138	0.00450185	0.00307457	5	CXCL8/IL1B/IL6/ITGA5/NLRP3
hsa05140	Leishmaniasis	5/75	77/8577	0.000540818	0.00454287	0.00310259	5	FCGR2A/HLA-DRB4/IL1B/PTGS2/TGFB2
hsa04610	Complement and coagulation cascades	5/75	86/8577	0.000896918	0.00717535	0.00490046	5	FGA/ITGAX/PLAUR/SERPINE1/VTN
hsa05152	Tuberculosis	7/75	180/8577	0.000951526	0.0072662	0.0049625	7	CEBPB/FCGR2A/HLA-DRB4/IL1B/IL6/ITGAX/TGFB2
hsa04151	PI3K-Akt signaling pathway	10/75	359/8577	0.00106443	0.00771155	0.00526666	10	AREG/EREG/FN1/IBSP/IL6/ITGA5/ITGB3/OSM/THBS1/VTN
hsa05410	Hypertrophic cardiomyopathy	5/75	90/8577	0.00110165	0.00771155	0.00526666	5	EDN1/IL6/ITGA5/ITGB3/TGFB2
hsa04621	NOD-like receptor signaling pathway	7/75	186/8577	0.00115266	0.00774587	0.0052901	7	CXCL2/CXCL3/CXCL8/IL1B/IL6/MEFV/NLRP3
hsa05202	Transcriptional misregulation in cancer	7/75	193/8577	0.00142806	0.00915466	0.00625224	7	BCL2A1/CEBPB/CSF2/CXCL8/DUSP6/IL6/MMP3
hsa05167	Kaposi sarcoma-associated herpesvirus infection	7/75	194/8577	0.00147128	0.00915466	0.00625224	7	CSF2/CXCL2/CXCL3/CXCL8/IL6/PTGS2/ZFP36
hsa04145	Phagosome	6/75	152/8577	0.00206593	0.0123956	0.00846566	6	FCGR2A/HLA-DRB4/ITGA5/ITGB3/OLR1/THBS1
hsa01523	Antifolate resistance	3/75	30/8577	0.00220053	0.0127479	0.00870627	3	FOLR3/IL1B/IL6
hsa05321	Inflammatory bowel disease	4/75	65/8577	0.00244024	0.0136654	0.00933286	4	HLA-DRB4/IL1B/IL6/TGFB2
hsa05120	Epithelial cell signaling in Helicobacter pylori infection	4/75	70/8577	0.00319804	0.0173313	0.0118365	4	CXCL2/CXCL3/CXCL8/HBEGF
hsa05164	Influenza A	6/75	171/8577	0.00371819	0.0195205	0.0133317	6	CXCL8/HLA-DRB4/IL1B/IL6/NLRP3/SOCS3
hsa04623	Cytosolic DNA-sensing pathway	4/75	75/8577	0.00410263	0.0208861	0.0142643	4	IL1B/IL6/MEFV/NLRP3
hsa04380	Osteoclast differentiation	5/75	128/8577	0.00513198	0.025358	0.0173184	5	FCGR2A/IL1B/ITGB3/SOCS3/TGFB2
hsa05219	Bladder cancer	3/75	41/8577	0.00539395	0.0258909	0.0176824	3	CXCL8/HBEGF/THBS1
hsa05332	Graft-versus-host disease	3/75	42/8577	0.00577276	0.0269395	0.0183986	3	HLA-DRB4/IL1B/IL6
hsa04940	Type I diabetes mellitus	3/75	43/8577	0.00616716	0.0280022	0.0191243	3	HLA-DRB4/IL1B/PTPRN
hsa04062	Chemokine signaling pathway	6/75	192/8577	0.00651631	0.0288089	0.0196753	6	CCL20/CCL3L1/CXCL2/CXCL3/CXCL8/PPBP
hsa04936	Alcoholic liver disease	5/75	142/8577	0.00791096	0.034078	0.0232738	5	CXCL2/CXCL3/CXCL8/IL1B/IL6
hsa04510	Focal adhesion	6/75	203/8577	0.0084801	0.0356164	0.0243245	6	FN1/IBSP/ITGA5/ITGB3/THBS1/VTN
hsa04620	Toll-like receptor signaling pathway	4/75	104/8577	0.0128421	0.0513685	0.0350825	4	CCL3L1/CXCL8/IL1B/IL6
hsa04625	C-type lectin receptor signaling pathway	4/75	104/8577	0.0128421	0.0513685	0.0350825	4	IL1B/IL6/NLRP3/PTGS2
hsa05163	Human cytomegalovirus infection	6/75	225/8577	0.0136313	0.0532572	0.0363724	6	CCL3L1/CXCL8/IL1B/IL6/ITGB3/PTGS2
hsa04350	TGF-beta signaling pathway	4/75	108/8577	0.0145829	0.0549299	0.0375148	4	INHBA/NOG/TGFB2/THBS1
hsa04630	JAK-STAT signaling pathway	5/75	166/8577	0.0148587	0.0549299	0.0375148	5	CSF2/IL11/IL6/OSM/SOCS3
hsa04066	HIF-1 signaling pathway	4/75	109/8577	0.0150403	0.0549299	0.0375148	4	EDN1/IL6/SERPINE1/TIMP1
hsa04010	MAPK signaling pathway	7/75	301/8577	0.0158058	0.0564975	0.0385854	7	AREG/DUSP1/DUSP6/EREG/IL1B/PTPRR/TGFB2
hsa04614	Renin-angiotensin system	2/75	23/8577	0.0169518	0.0593311	0.0405206	2	ANPEP/MME
hsa05221	Acute myeloid leukemia	3/75	67/8577	0.0206277	0.0707236	0.0483012	3	BCL2A1/CSF2/DUSP6
hsa05165	Human papillomavirus infection	7/75	331/8577	0.025164	0.084208	0.0575105	7	FN1/IBSP/ITGA5/ITGB3/PTGS2/THBS1/VTN
hsa04613	Neutrophil extracellular trap formation	5/75	191/8577	0.0255631	0.084208	0.0575105	5	AQP9/FCGR2A/FGA/FPR2/ITGB3
hsa05130	Pathogenic Escherichia coli infection	5/75	198/8577	0.0292653	0.0945493	0.0645731	5	CXCL8/FCGR2A/IL1B/IL6/NLRP3
hsa05418	Fluid shear stress and atherosclerosis	4/75	139/8577	0.0331495	0.105078	0.0717635	4	DUSP1/EDN1/IL1B/ITGB3
hsa04012	ErbB signaling pathway	3/75	85/8577	0.0380706	0.118442	0.0808908	3	AREG/EREG/HBEGF
hsa05210	Colorectal cancer	3/75	86/8577	0.0392056	0.119755	0.0817877	3	AREG/EREG/TGFB2
hsa00760	Nicotinate and nicotinamide metabolism	2/75	37/8577	0.0412643	0.123793	0.0845453	2	NNMT/NT5E
hsa05166	Human T-cell leukemia virus 1 infection	5/75	222/8577	0.0444639	0.131052	0.0895027	5	CSF2/HLA-DRB4/IL6/TGFB2/ZFP36
hsa04932	Non-alcoholic fatty liver disease	4/75	155/8577	0.0464483	0.13454	0.0918851	4	CXCL8/IL1B/IL6/SOCS3
hsa04218	Cellular senescence	4/75	156/8577	0.0473654	0.134871	0.0921112	4	CXCL8/IL6/SERPINE1/TGFB2
hsa05150	Staphylococcus aureus infection	3/75	96/8577	0.0514885	0.141805	0.0968464	3	FCGR2A/FPR2/HLA-DRB4
hsa05414	Dilated cardiomyopathy	3/75	96/8577	0.0514885	0.141805	0.0968464	3	ITGA5/ITGB3/TGFB2
hsa05206	MicroRNAs in cancer	6/75	310/8577	0.0533866	0.14466	0.0987969	6	IGF2BP1/ITGA5/ITGB3/PTGS2/TGFB2/THBS1
hsa05131	Shigellosis	5/75	247/8577	0.0645655	0.172175	0.117588	5	CSF2/CXCL8/IL1B/ITGA5/NLRP3
hsa00280	Valine, leucine and isoleucine degradation	2/75	48/8577	0.0657545	0.172605	0.117882	2	BCAT1/IL4I1
hsa04672	Intestinal immune network for IgA production	2/75	49/8577	0.0681751	0.174075	0.118886	2	HLA-DRB4/IL6
hsa04659	Th17 cell differentiation	3/75	108/8577	0.0683867	0.174075	0.118886	3	HLA-DRB4/IL1B/IL6
hsa00270	Cysteine and methionine metabolism	2/75	52/8577	0.07561	0.189589	0.129481	2	BCAT1/IL4I1
hsa05320	Autoimmune thyroid disease	2/75	53/8577	0.0781437	0.193061	0.131852	2	HLA-DRB4/TG
hsa04923	Regulation of lipolysis in adipocytes	2/75	58/8577	0.0911986	0.222049	0.15165	2	FABP4/PTGS2
hsa04611	Platelet activation	3/75	124/8577	0.0942959	0.22631	0.15456	3	FCGR2A/FGA/ITGB3
hsa00360	Phenylalanine metabolism	1/75	16/8577	0.131205	0.310457	0.212029	1	IL4I1
hsa04024	cAMP signaling pathway	4/75	225/8577	0.133767	0.312122	0.213166	4	EDN1/HCAR2/HCAR3/PDE4B
hsa04115	p53 signaling pathway	2/75	74/8577	0.136569	0.313683	0.214232	2	SERPINE1/THBS1
hsa03320	PPAR signaling pathway	2/75	75/8577	0.139552	0.313683	0.214232	2	FABP4/OLR1
hsa04810	Regulation of actin cytoskeleton	4/75	229/8577	0.140037	0.313683	0.214232	4	FN1/ITGA5/ITGAX/ITGB3
hsa05100	Bacterial invasion of epithelial cells	2/75	77/8577	0.145561	0.317589	0.2169	2	FN1/ITGA5
hsa05412	Arrhythmogenic right ventricular cardiomyopathy	2/75	77/8577	0.145561	0.317589	0.2169	2	ITGA5/ITGB3
hsa01210	2-Oxocarboxylic acid metabolism	1/75	19/8577	0.153842	0.331351	0.226299	1	BCAT1
hsa04390	Hippo signaling pathway	3/75	157/8577	0.157901	0.33579	0.22933	3	AREG/SERPINE1/TGFB2
hsa05161	Hepatitis B	3/75	162/8577	0.168504	0.349707	0.238835	3	CXCL8/IL6/TGFB2
hsa00770	Pantothenate and CoA biosynthesis	1/75	21/8577	0.168609	0.349707	0.238835	1	BCAT1
hsa05132	Salmonella infection	4/75	249/8577	0.173077	0.354597	0.242175	4	CXCL8/IL1B/IL6/NLRP3
hsa04976	Bile secretion	2/75	89/8577	0.182622	0.366242	0.250128	2	AQP9/SLC4A4
hsa04964	Proximal tubule bicarbonate reclamation	1/75	23/8577	0.183121	0.366242	0.250128	1	SLC4A4
hsa05222	Small cell lung cancer	2/75	92/8577	0.192103	0.379685	0.259309	2	FN1/PTGS2
hsa04360	Axon guidance	3/75	182/8577	0.212797	0.415697	0.283903	3	L1CAM/NTN4/SEMA3B
hsa04928	Parathyroid hormone synthesis, secretion and action	2/75	106/8577	0.237059	0.455726	0.311241	2	HBEGF/PDE4B
hsa05310	Asthma	1/75	31/8577	0.238713	0.455726	0.311241	1	HLA-DRB4
hsa04931	Insulin resistance	2/75	108/8577	0.243544	0.459724	0.313972	2	IL6/SOCS3
hsa05145	Toxoplasmosis	2/75	111/8577	0.253287	0.472802	0.322904	2	HLA-DRB4/TGFB2
hsa04726	Serotonergic synapse	2/75	115/8577	0.266293	0.490533	0.335013	2	DUSP1/PTGS2
hsa00350	Tyrosine metabolism	1/75	36/8577	0.271545	0.490533	0.335013	1	IL4I1
hsa00512	Mucin type O-glycan biosynthesis	1/75	36/8577	0.271545	0.490533	0.335013	1	GALNT15
hsa00250	Alanine, aspartate and glutamate metabolism	1/75	37/8577	0.277942	0.496747	0.339257	1	IL4I1
hsa05330	Allograft rejection	1/75	38/8577	0.284283	0.502732	0.343345	1	HLA-DRB4
hsa04216	Ferroptosis	1/75	41/8577	0.302979	0.529891	0.361893	1	SAT1
hsa00230	Purine metabolism	2/75	128/8577	0.308511	0.529891	0.361893	2	NT5E/PDE4B
hsa00380	Tryptophan metabolism	1/75	42/8577	0.309103	0.529891	0.361893	1	IL4I1
hsa04068	FoxO signaling pathway	2/75	131/8577	0.318206	0.539985	0.368787	2	IL6/TGFB2
hsa04142	Lysosome	2/75	132/8577	0.321431	0.540004	0.3688	2	CTSE/SLC11A1
hsa04270	Vascular smooth muscle contraction	2/75	134/8577	0.327871	0.54505	0.372246	2	ADM/EDN1
hsa04930	Type II diabetes mellitus	1/75	46/8577	0.333074	0.54505	0.372246	1	SOCS3
hsa05322	Systemic lupus erythematosus	2/75	137/8577	0.337502	0.54505	0.372246	2	FCGR2A/HLA-DRB4
hsa00514	Other types of O-glycan biosynthesis	1/75	47/8577	0.338937	0.54505	0.372246	1	GALNT15
hsa05162	Measles	2/75	138/8577	0.340703	0.54505	0.372246	2	IL1B/IL6
hsa04371	Apelin signaling pathway	2/75	139/8577	0.343901	0.54505	0.372246	2	APLN/SERPINE1
hsa00330	Arginine and proline metabolism	1/75	50/8577	0.356223	0.559304	0.381981	1	SAT1
hsa04913	Ovarian steroidogenesis	1/75	51/8577	0.361886	0.562933	0.38446	1	PTGS2
hsa00480	Glutathione metabolism	1/75	57/8577	0.394843	0.599292	0.409291	1	ANPEP
hsa00240	Pyrimidine metabolism	1/75	58/8577	0.40017	0.599292	0.409291	1	NT5E
hsa04080	Neuroactive ligand-receptor interaction	4/75	367/8577	0.40068	0.599292	0.409291	4	ADM/APLN/EDN1/FPR2
hsa04514	Cell adhesion molecules	2/75	158/8577	0.403586	0.599292	0.409291	2	HLA-DRB4/L1CAM
hsa04370	VEGF signaling pathway	1/75	59/8577	0.405451	0.599292	0.409291	1	PTGS2
hsa04217	Necroptosis	2/75	159/8577	0.406663	0.599292	0.409291	2	IL1B/NLRP3
hsa05416	Viral myocarditis	1/75	60/8577	0.410685	0.599958	0.409746	1	HLA-DRB4
hsa00590	Arachidonic acid metabolism	1/75	61/8577	0.415875	0.602302	0.411346	1	PTGS2
hsa05010	Alzheimer disease	4/75	384/8577	0.434493	0.623887	0.426088	4	IL1B/IL6/MME/PTGS2
hsa04664	Fc epsilon RI signaling pathway	1/75	68/8577	0.45096	0.627658	0.428664	1	CSF2
hsa04920	Adipocytokine signaling pathway	1/75	69/8577	0.455799	0.627658	0.428664	1	SOCS3
hsa04924	Renin secretion	1/75	69/8577	0.455799	0.627658	0.428664	1	EDN1
hsa05204	Chemical carcinogenesis - DNA adducts	1/75	69/8577	0.455799	0.627658	0.428664	1	PTGS2
hsa05211	Renal cell carcinoma	1/75	69/8577	0.455799	0.627658	0.428664	1	TGFB2
hsa04917	Prolactin signaling pathway	1/75	70/8577	0.460597	0.629107	0.429654	1	SOCS3
hsa04622	RIG-I-like receptor signaling pathway	1/75	71/8577	0.465352	0.630477	0.430589	1	CXCL8
hsa01230	Biosynthesis of amino acids	1/75	75/8577	0.483964	0.641177	0.437897	1	BCAT1
hsa04918	Thyroid hormone synthesis	1/75	75/8577	0.483964	0.641177	0.437897	1	TG
hsa05212	Pancreatic cancer	1/75	76/8577	0.488516	0.641177	0.437897	1	TGFB2
hsa05220	Chronic myeloid leukemia	1/75	76/8577	0.488516	0.641177	0.437897	1	TGFB2
hsa04612	Antigen processing and presentation	1/75	78/8577	0.497502	0.64791	0.442495	1	HLA-DRB4
hsa01521	EGFR tyrosine kinase inhibitor resistance	1/75	79/8577	0.501936	0.648656	0.443005	1	IL6
hsa01232	Nucleotide metabolism	1/75	85/8577	0.527743	0.675606	0.46141	1	NT5E
hsa05169	Epstein-Barr virus infection	2/75	202/8577	0.530833	0.675606	0.46141	2	HLA-DRB4/IL6
hsa04015	Rap1 signaling pathway	2/75	210/8577	0.551971	0.685271	0.468011	2	ITGB3/THBS1
hsa05032	Morphine addiction	1/75	91/8577	0.552229	0.685271	0.468011	1	PDE4B
hsa04658	Th1 and Th2 cell differentiation	1/75	92/8577	0.556187	0.685271	0.468011	1	HLA-DRB4
hsa04520	Adherens junction	1/75	93/8577	0.56011	0.685271	0.468011	1	SNAI1
hsa04912	GnRH signaling pathway	1/75	93/8577	0.56011	0.685271	0.468011	1	HBEGF
hsa04666	Fc gamma R-mediated phagocytosis	1/75	97/8577	0.575462	0.685271	0.468011	1	FCGR2A
hsa05215	Prostate cancer	1/75	97/8577	0.575462	0.685271	0.468011	1	MMP3
hsa01522	Endocrine resistance	1/75	98/8577	0.579217	0.685271	0.468011	1	HBEGF
hsa04750	Inflammatory mediator regulation of TRP channels	1/75	98/8577	0.579217	0.685271	0.468011	1	IL1B
hsa05231	Choline metabolism in cancer	1/75	98/8577	0.579217	0.685271	0.468011	1	SLC22A4
hsa04916	Melanogenesis	1/75	101/8577	0.590286	0.692281	0.472799	1	EDN1
hsa04972	Pancreatic secretion	1/75	102/8577	0.593911	0.692281	0.472799	1	SLC4A4
hsa04974	Protein digestion and absorption	1/75	103/8577	0.597505	0.692281	0.472799	1	MME
hsa04935	Growth hormone synthesis, secretion and action	1/75	120/8577	0.65401	0.745873	0.509399	1	SOCS3
hsa04660	T cell receptor signaling pathway	1/75	121/8577	0.657078	0.745873	0.509399	1	CSF2
hsa04919	Thyroid hormone signaling pathway	1/75	121/8577	0.657078	0.745873	0.509399	1	ITGB3
hsa04926	Relaxin signaling pathway	1/75	129/8577	0.680678	0.766553	0.523523	1	EDN1
hsa04650	Natural killer cell mediated cytotoxicity	1/75	132/8577	0.689108	0.766553	0.523523	1	CSF2
hsa05020	Prion disease	2/75	272/8577	0.693047	0.766553	0.523523	2	IL1B/IL6
hsa04210	Apoptosis	1/75	136/8577	0.700008	0.766553	0.523523	1	BCL2A1
hsa04910	Insulin signaling pathway	1/75	137/8577	0.702674	0.766553	0.523523	1	SOCS3
hsa04915	Estrogen signaling pathway	1/75	137/8577	0.702674	0.766553	0.523523	1	HBEGF
hsa04120	Ubiquitin mediated proteolysis	1/75	142/8577	0.715654	0.773428	0.528218	1	SOCS3
hsa04550	Signaling pathways regulating pluripotency of stem cells	1/75	143/8577	0.718183	0.773428	0.528218	1	INHBA
hsa04072	Phospholipase D signaling pathway	1/75	148/8577	0.730495	0.774378	0.528867	1	CXCL8
hsa04723	Retrograde endocannabinoid signaling	1/75	148/8577	0.730495	0.774378	0.528867	1	PTGS2
hsa05226	Gastric cancer	1/75	149/8577	0.732893	0.774378	0.528867	1	TGFB2
hsa01240	Biosynthesis of cofactors	1/75	153/8577	0.742276	0.776664	0.530429	1	BCAT1
hsa04921	Oxytocin signaling pathway	1/75	154/8577	0.744571	0.776664	0.530429	1	PTGS2
hsa04110	Cell cycle	1/75	157/8577	0.751334	0.776664	0.530429	1	TGFB2
hsa05160	Hepatitis C	1/75	158/8577	0.753549	0.776664	0.530429	1	SOCS3
hsa05225	Hepatocellular carcinoma	1/75	168/8577	0.774656	0.79355	0.541961	1	TGFB2
hsa05022	Pathways of neurodegeneration - multiple diseases	3/75	476/8577	0.794259	0.8087	0.552307	3	IL1B/IL6/PTGS2
hsa05415	Diabetic cardiomyopathy	1/75	203/8577	0.835415	0.84548	0.577427	1	TGFB2
hsa04144	Endocytosis	1/75	250/8577	0.892293	0.897636	0.613047	1	FOLR3
hsa05012	Parkinson disease	1/75	266/8577	0.906821	0.906821	0.61932	1	DUSP1
